# Supplementary material for: Escherichia coli Deletion Mutants Illuminate Trade-Offs between Growth Rate and Flux through a Foreign Anabolic Pathway
Source: PLoS One. 2014 Feb 4;9(2):e88159. doi: 10.1371/journal.pone.0088159 (PMC3913754; doi:10.1371/journal.pone.0088159)
Supplement: Table S1 — Lux Keio parameters. The lux/Keio strains were propagated three times in 384 well microtiter plates, the luminescence and optical density at 600 nm were measured every 30 minutes, and the maximum growth rate (max V OD), integrated optical density (area under growth curve, int OD), integrated luminescence (area under luminescence curve, int lum), maximum optical density at 600 nm (max OD), maximum luminescence (max lum) were calculated for each technical replicate. (XLSX) [file pone.0088159.s001.xlsx]

## Sheet: Sheet1
Strain and location											Replicate 1							Replicate 2							Replicate 3							Average	St Err	Average	St Err	Average	St Err	Average	St Err		average		average		max V OD	corrected
JW_ID	ECK_ID	B_ID	Gene	plate384	plate96	row96	column96	row384	column384		max V OD	int OD	int lum	max OD	max lum	lum/OD		max V OD	int OD	int lum	max OD	max lum	lum/OD		max V OD	int OD	int lum	max OD	max lum	lum/OD		int OD		int lum		max OD		max lum			max V OD	std error	lum/OD	std error	Correction	max V OD
JW1950	ECK1963	b1967	hchA	1	1	1	A	1	A		0.971	49775.3	1806998400	0.528	45190	85587.1		1.119	62029.3	282703500	0.537	5840	10875.2		1.228	70790.3	152049600	0.604	3441	5697.02		60865	6094.38	747250500	5.31215e+08	0.556333	0.0239745	18157	13534.2		1.106	0.0744737	34053.1	25810.3	0.740584	0.819086
JW0807	ECK0813	b0823	ybiW	1	3	1	A	2	A		0.97	49872.5	1848381300	0.464	48171	103817		0.586	40696.7	2595228300	0.346	58693	169633		0.855	58803.3	2006937900	0.51	45629	89468.6		49790.8	5227.07	2150182500	2.27182e+08	0.44	0.0488399	50831	3998.91		0.803667	0.113784	120973	24680.1	0.740584	0.595183
JW3701	ECK3716	b3723	bglG	1	1	2	A	3	A		0.755	41447.1	3533449500	0.418	86863	207806		0.567	34764	6523591500	0.319	142665	447226		0.675	41595.1	7113946500	0.39	169838	435482		39268.7	2252.76	5723662500	1.10829e+09	0.375667	0.0294637	133122	24423.4		0.665667	0.0544712	363505	77923	0.740584	0.492982
JW1228	ECK1235	b1241	adhE	1	3	2	A	4	A		0.01	13818.4	107263800	0.082	2300	28048.8		-0.03	13377	186156900	0.081	3583	44234.6		0.361	29273.9	1430293500	0.251	36580	145737		18823.1	5226.97	574571400	4.28467e+08	0.138	0.0565007	14154.3	11218.9		0.113667	0.124205	72673.5	36829.4	0.740584	0.0841797
JW3905	ECK3926	b3934	cytR	1	1	3	A	5	A		0.013	13643	72249300	0.08	1561	19512.5		0.015	12776.2	90934200	0.078	1331	17064.1		0.833	47710.3	3036775500	0.467	72091	154370		24709.9	11503	1066653000	9.85076e+08	0.208333	0.129335	24994.3	23548.4		0.287	0.273001	63649	45366.2	0.740584	0.212548
JW1692	ECK1700	b1702	pps	1	3	3	A	6	A		1.407	77224.2	93677400	0.679	2243	3303.39		0.699	49505.9	485061300	0.404	7209	17844.1		0.853	60575	269738100	0.471	4956	10522.3		62435.1	8055.45	282825600	1.13172e+08	0.518	0.0827909	4802.67	1435.61		0.986333	0.21498	10556.6	4197.57	0.740584	0.730463
JW1328	ECK1330	b1334	fnr	1	1	4	A	7	A		0.016	13847.2	53527500	0.082	956	11658.5		0.476	33366.1	4764312900	0.303	85350	281683		0.835	45944.3	2149905600	0.451	49063	108787		31052.5	9337.55	2322582000	1.36262e+09	0.278667	0.107214	45123	24442		0.442333	0.237023	134043	78965.6	0.740584	0.327585
JW2273	ECK2272	b2278	nuoL	1	3	4	A	8	A		0.281	30188.7	1261120500	0.24	19325	80520.8		0.248	24745.3	2152166400	0.188	28969	154090		0.337	32919.6	2125040400	0.259	39133	151093		29284.5	2402.62	1846109100	2.92599e+08	0.229	0.0212211	29142.3	5718.73		0.288667	0.0259765	128568	24039.2	0.740584	0.213782
JW0430	ECK0434	b0440	hupB	1	1	5	A	9	A		1.059	63788.7	414588600	0.539	9456	17543.6		0.965	64662.1	603022500	0.508	10822	21303.1		0.954	67662	597906900	0.552	13368	24217.4		65370.9	1172.96	538506000	6.19763e+07	0.533	0.0130512	11215.3	1146.29		0.992667	0.0333183	21021.4	1931.7	0.740584	0.735153
JW5875	ECK2281	b2287	nuoB	1	3	5	A	10	A		0.476	44678.2	3070431900	0.377	53993	143218		0.381	37234.8	4755552300	0.291	78733	270560		0.499	52606	5150923200	0.412	97802	237383		44839.7	4438.01	4325635800	6.37896e+08	0.36	0.035949	76842.7	12681.8		0.452	0.0361156	217054	38140.1	0.740584	0.334744
JW3205	ECK3225	b3236	mdh	1	3	6	A	12	A		1.116	56546	1012082400	0.531	29399	55365.3		2.209	61659.2	1676152800	0.69	43198	62605.8		1.037	61936.8	1550844900	0.549	43085	78479.1		60047.3	1752.5	1413026700	2.0371e+08	0.59	0.0502693	38560.7	4580.95		1.454	0.378188	65483.4	6825.72	0.740584	1.07681
JW0662	ECK0664	b0676	nagC	1	1	7	A	13	A		1.527	78178.9	134635500	0.651	2995	4600.61		1.426	81685	183525300	0.648	3342	5157.41		1.351	78056	192283200	0.626	4184	6683.71		79306.6	1189.71	170148000	1.79353e+07	0.641667	0.00788106	3507	353.01		1.43467	0.0509913	5480.58	622.668	0.740584	1.06249
JW3923	ECK3942	b3951	pflD	1	3	7	A	14	A		0.995	57430	1062928800	0.541	26503	48988.9		0.729	50752.4	1531558800	0.445	31097	69880.9		0.986	69346.7	1615932000	0.589	33069	56144.3		59176.4	5438.26	1403473200	1.72005e+08	0.525	0.042332	30223	1945.16		0.903333	0.0872054	58338	6129.93	0.740584	0.668994
JW3877	ECK3899	b3906	rhaR	1	1	8	A	15	A		0.925	56119.9	1295442000	0.514	32925	64056.4		0.759	46408.9	2088471600	0.414	47016	113565		0.82	59867.9	1566206100	0.512	35146	68644.5		54132.2	4010.39	1650039900	2.32734e+08	0.48	0.0330051	38362.3	4374.08		0.834667	0.0484779	82088.7	15793.9	0.740584	0.618141
JW4112	ECK4147	b4151	frdD	1	3	8	A	16	A		1.15	43681.8	426644100	0.573	7621	13300.2		0.496	28906.1	1177614000	0.345	20879	60518.8		1.204	83726.1	148066200	0.637	3186	5001.57		52104.7	16376	584108100	3.07456e+08	0.518333	0.088614	10562	5315		0.95	0.227535	26273.5	17289.4	0.740584	0.703555
JW1316	ECK1319	b1323	tyrR	1	1	9	A	17	A		0.935	55436.4	1755861300	0.506	45938	90786.6		0.708	45353.2	2771728200	0.391	65746	168148		0.722	53216.5	2259810900	0.445	54698	122917		51335.4	3058.94	2262466800	2.93259e+08	0.447333	0.0332181	55460.7	5730.78		0.788333	0.0734446	127284	22438.9	0.740584	0.583827
JW5917	ECK2211	b2218	rcsC	1	1	10	A	19	A		0.661	42734.6	3102916500	0.425	64160	150965		0.683	40550.9	4268738700	0.381	82650	216929		0.827	49314	3334947300	0.471	75343	159964		44199.8	2633.62	3568867500	3.56288e+08	0.425667	0.0259829	74051	5376.55		0.723667	0.0520555	175953	20652.3	0.740584	0.535936
JW1115	ECK1115	b1129	phoQ	1	3	10	A	20	A		1.249	52307.3	527490900	0.542	10146	18719.6		1.069	51395.4	598378500	0.504	11092	22007.9		0.975	58133.4	1137762900	0.532	22876	43000		53945.4	2110.51	754544100	1.92699e+08	0.526	0.0113725	14704.7	4094.78		1.09767	0.0803852	27909.2	7604.9	0.740584	0.812914
JW0111	ECK0114	b0115	aceF	1	1	11	A	21	A		0.704	48093.9	3953047500	0.449	88709	197570		0.515	40124.6	6046565400	0.337	123919	367712		0.525	51410.2	6469628400	0.407	140254	344604		46542.9	3348.89	5489747100	7.77995e+08	0.397667	0.0326667	117627	15208.7		0.581333	0.0614012	303296	53281.9	0.740584	0.430526
JW1872	ECK1884	b1883	cheB	1	3	11	A	22	A		0.925	57336.5	1374900300	0.521	32357	62105.6		0.781	48913.9	2165199300	0.418	47272	113091		0.884	63821.2	1925513100	0.531	42337	79730.7		56690.5	4315.45	1821870900	2.33951e+08	0.49	0.0361156	40655.3	4386.92		0.863333	0.0428343	84975.7	14950	0.740584	0.639371
JW0711	ECK0710	b0721	sdhC	1	1	12	A	23	A		0.77	46533.3	1459156500	0.464	34305	73933.2		0.797	43705.3	2855709900	0.407	61682	151553		0.803	50963.8	2621701800	0.47	62126	132183		47067.5	2112.3	2312189400	4.31833e+08	0.447	0.0200749	52704.3	9200.56		0.79	0.0101489	119223	23325	0.740584	0.585061
JW2213	ECK2212	b2219	atoS	1	3	12	A	24	A		0.877	51052.2	1138075200	0.487	29449	60470.2		0.475	38343.3	1520097300	0.331	33254	100465		0.842	55121	178647300	0.502	4062	8091.63		48172.2	5052.85	945606600	3.99022e+08	0.44	0.0546717	22255	9162.58		0.731333	0.128564	56342.4	26745.7	0.740584	0.541614
JW2757	ECK2780	b2786	barA	1	5	1	A	1	B		1.112	63244.1	1548819000	0.619	43572	70391		0.817	51406.2	1962711000	0.492	44120	89674.8		1.124	61487.8	851749200	0.587	23186	39499.1		58712.7	3688.26	1454426400	3.24161e+08	0.566	0.0381357	36959.3	6888.48		1.01767	0.100393	66521.6	14613.1	0.740584	0.753668
JW3959	ECK3987	b3995	rsd	1	7	1	A	2	B		0.908	58012.5	1038498300	0.521	25506	48955.9		0.805	55717.8	358847100	0.445	6738	15141.6		0.884	67387.3	303665400	0.546	6668	12212.5		60372.5	3569.39	567003600	2.36285e+08	0.504	0.0303699	12970.7	6267.7		0.865667	0.0311145	25436.6	11790	0.861677	0.745925
JW3644	ECK3660	b3669	uhpA	1	5	2	A	3	B		0.812	51539.5	1596879000	0.466	34681	74422.7		0.523	39873.8	2407941900	0.322	42072	130658		0.783	67152.2	2292950700	0.512	43372	84710.9		52855.2	7902.04	2099257200	2.53373e+08	0.433333	0.0572286	40041.7	2706.48		0.706	0.0918822	96597.4	17287.5	0.861677	0.608344
JW2142	ECK2148	b2155	cirA	1	7	2	A	4	B		0.967	56263.7	402627600	0.491	8871	18067.2		0.699	53871.4	503792100	0.425	9721	22872.9		0.846	63981.1	554049000	0.515	12325	23932		58038.7	3050.39	486822900	4.45274e+07	0.477	0.0269072	10305.7	1039.05		0.837333	0.0774862	21624.1	1804.52	0.861677	0.721511
JW4074	ECK4106	b4113	basR	1	5	3	A	5	B		0.589	38760.4	2760442200	0.38	67392	177347		-0.059	13267.9	302046300	0.083	4762	57373.5		0.727	44509.9	4027687200	0.409	97813	239152		32179.4	9600.32	2363391900	1.09367e+09	0.290667	0.10417	56655.7	27392.7		0.419	0.242297	157957	53362.9	0.861677	0.361043
JW0755	ECK0761	b0772	ybhC	1	7	3	A	6	B		-0.04	13987.4	120770100	0.084	1882	22404.8		0.33	30352.7	12849960600	0.267	223067	835457		0.731	47263.7	3229500600	0.432	73162	169356		30534.6	9606.45	5400077100	3.83152e+09	0.261	0.100504	99370.3	65181.4		0.340333	0.222628	342406	250149	0.861677	0.293257
JW1186	ECK1185	b1197	treA	1	5	4	A	7	B		1.021	60147.8	493333200	0.517	12069	23344.3		0.657	51950.2	1042603200	0.405	16310	40271.6		0.839	67805.8	803630700	0.516	17829	34552.3		59968	4577.99	779855700	1.59006e+08	0.479333	0.0371678	15402.7	1723.55		0.839	0.105078	32722.7	4971.38	0.861677	0.722947
JW0855	ECK0862	b0871	poxB	1	5	5	A	9	B		0.618	41420.8	2180285100	0.394	45136	114558		0.413	35268.3	4010685300	0.296	69051	233280		0.597	50889.7	5285441700	0.412	109786	266471		42526.3	4543.26	3825470700	9.01153e+08	0.367333	0.0360432	74657.7	18872.2		0.542667	0.0651161	204770	46112.1	0.861677	0.467603
JW2047	ECK2056	b2062	wza	1	7	5	A	10	B		0.809	50426.5	970323300	0.442	23615	53427.6		0.556	47071.1	1560167100	0.379	28470	75118.7		0.831	59064.8	1386222300	0.494	31314	63388.7		52187.4	3572.48	1305570900	1.74983e+08	0.438333	0.0332482	27799.7	2247.64		0.732	0.0882289	63978.3	6268.63	0.861677	0.630748
JW5478	ECK2930	b2935	tktA	1	5	6	A	11	B		0.687	47992.9	1569924900	0.438	35058	80041.1		0.518	42068.9	2674616400	0.351	49764	141778		0.636	51034.6	2526560100	0.429	54086	126075		47032.1	2632.39	2257033800	3.46203e+08	0.406	0.0276225	46302.7	5759.1		0.613667	0.0500478	115964	18524.9	0.861677	0.528782
JW0401	ECK0405	b0411	tsx	1	5	7	A	13	B		0.857	54521.1	987164100	0.489	23354	47758.7		0.821	60300.6	1464192000	0.531	29575	55696.8		0.785	59061.4	1408554900	0.489	31975	65388.5		57961	1756.78	1286637000	1.50595e+08	0.503	0.014	28301.3	2568.86		0.821	0.0207846	56281.3	5097.69	0.861677	0.707437
JW3043	ECK3062	b3072	aer	1	5	8	A	15	B		0.871	62543.5	463362300	0.52	10915	20990.4		0.689	62149.3	293817600	0.489	5343	10926.4		0.946	74837.5	264955500	0.55	5588	10160		66510.1	4165.25	340711800	6.18886e+07	0.519667	0.01761	7282	1817.88		0.835333	0.0763028	14025.6	3489.42	0.861677	0.719788
JW5896	ECK0757	b0768	ybhD	1	7	8	A	16	B		0.782	53511.8	1238163300	0.461	27632	59939.3		0.567	46646.3	1971006300	0.358	35353	98751.4		0.723	58994.5	1590824700	0.478	32739	68491.6		53050.9	3572.06	1599998100	2.11603e+08	0.432333	0.0374893	31908	2267.26		0.690667	0.0641361	75727.4	11773.7	0.861677	0.595132
JW0100	ECK0103	b0103	coaE	1	5	9	A	17	B		0.822	61427.2	284319900	0.522	6723	12879.3		0.519	52298.7	361663200	0.465	6310	13569.9		0.732	64492.6	304669800	0.52	6697	12878.8		59406.2	3662.24	316884300	2.31473e+07	0.502333	0.0186756	6576.67	133.544		0.691	0.0898387	13109.3	230.271	0.861677	0.595419
JW1587	ECK1590	b1595	ynfL	1	7	9	A	18	B		0.936	48891.2	1731070800	0.472	41157	87197		0.421	34760	2865070800	0.295	49346	167275		0.627	48296	3237147000	0.43	73836	171712		43982.4	4614.39	2611096200	4.52933e+08	0.399	0.0533948	54779.7	9817.04		0.661333	0.149656	142061	27461.9	0.861677	0.569856
JW0560	ECK0563	b0571	cusR	1	5	10	A	19	B		0.849	51857.6	1418405400	0.456	34196	74991.2		0.629	46432.3	2481900300	0.378	46881	124024		0.766	56939.1	2086749900	0.465	45723	98329		51743	3033.59	1995685200	3.10363e+08	0.433	0.0276225	42266.7	4049.16		0.748	0.0641431	99114.7	14159.9	0.861677	0.644534
JW0104	ECK0107	b0108	ppdD	1	7	10	A	20	B		1.033	64363.2	184045500	0.517	3594	6951.64		0.644	53799	304438500	0.419	5143	12274.5		0.978	73006.9	314328600	0.554	6279	11333.9		63723.1	5554.07	267604200	4.18768e+07	0.496667	0.0402754	5005.33	778.143		0.885	0.121541	10186.7	1640.15	0.861677	0.762584
JW0483	ECK0488	b0494	tesA	1	7	11	A	22	B		0.722	48523.1	1728605700	0.444	40124	90369.4		0.601	39055.8	2904254100	0.337	58082	172350		0.647	52124.2	2764692000	0.435	64633	148582		46567.7	3897.17	2465850600	3.70818e+08	0.405333	0.0342653	54279.7	7326.12		0.656667	0.0352625	137100	24352.1	0.861677	0.565835
JW1113	ECK1113	b1127	pepT	1	7	12	A	24	B		1.287	58975.3	1080190800	0.55	28798	52360		0.922	55486.2	1961482500	0.496	48421	97623		1.162	61866.8	1709352000	0.573	50748	88565.4		58776.1	1844.62	1583675100	2.62053e+08	0.539667	0.0228206	42655.7	6961.32		1.12367	0.107095	79516.1	13827.5	0.740584	0.83217
JW1262	ECK1264	b1270	btuR	1	1	2	B	3	C		0.633	40321.3	2141818200	0.384	47672	124146		0.513	35306.6	3447097200	0.313	61063	195089		0.707	55929.2	3145761000	0.472	67598	143216		43852.3	6209.54	2911558800	3.94578e+08	0.389667	0.0459867	58777.7	5864.54		0.617667	0.0565253	154150	21196.9	0.946387	0.584552
JW1268	ECK1271	b1276	acnA	1	3	2	B	4	C		0.661	48956.7	2471976000	0.448	51753	115520		0.527	40451.5	4020491700	0.338	63375	187500		0.686	63276.8	3094474500	0.51	58951	115590		50895	6660	3195647400	4.49871e+08	0.432	0.0502925	58026.3	3386.69		0.624667	0.0493637	139537	23981.6	0.946387	0.591176
JW0824	ECK0830	b0840	deoR	1	1	3	B	5	C		0.883	58456.5	209091600	0.491	3366	6855.4		0.711	55487.7	260802900	0.446	3768	8448.43		0.839	66856.5	356826600	0.537	6960	12960.9		60266.9	3404.43	275573700	4.32822e+07	0.491333	0.02627	4698	1136.94		0.811	0.0515881	9421.57	1828.44	0.946387	0.76752
JW2776	ECK2800	b2805	fucR	1	1	4	B	7	C		0.82	56666.2	200745000	0.471	4381	9301.49		0.613	47942.5	286407000	0.383	4394	11472.6		0.8	63789.4	207311400	0.501	4758	9497.01		56132.7	4582.38	231487800	2.75249e+07	0.451667	0.0354087	4511	123.557		0.744333	0.06592	10090.4	693.414	0.946387	0.704427
JW2274	ECK2273	b2279	nuoK	1	3	4	B	8	C		0.474	41095.8	1337559300	0.367	25991	70820.2		0.27	31373.5	2126569500	0.254	31390	123583		0.415	45473.8	1693616400	0.389	31297	80455		39314.4	4166.7	1719248400	2.28128e+08	0.336667	0.0418184	29559.3	1784.37		0.386333	0.0606089	91619.3	16221.9	0.946387	0.365621
JW2883	ECK2912	b2916	argP	1	1	5	B	9	C		0.849	68494.5	213069600	0.559	4449	7958.86		0.645	64031.1	285074100	0.534	4277	8009.36		0.868	72750	290317500	0.532	5987	11253.8		68425.2	2517.15	262820400	2.49214e+07	0.541667	0.00868588	4904.33	543.606		0.787333	0.0713777	9073.99	1089.98	0.946387	0.745122
JW2283	ECK2282	b2288	nuoA	1	3	5	B	10	C		0.737	44520.8	1292034600	0.415	27380	65975.9		0.462	38061.7	2091511800	0.331	34496	104218		0.716	54753	2274374700	0.461	46209	100236		45778.5	4859.23	1885973700	3.01625e+08	0.402333	0.0380584	36028.3	5489.2		0.638333	0.0883748	90143.3	12138.2	0.946387	0.60411
JW3343	ECK3367	b3380	yhfW	1	3	6	B	12	C		0.831	52629.5	994662000	0.455	22098	48567		0.559	46371.2	2009458800	0.387	36090	93255.8		0.727	60334	1759637700	0.49	37945	77438.8		53111.6	4037.91	1587919500	3.0527e+08	0.444	0.0302379	32044.3	5001.91		0.705667	0.0792408	73087.2	13082.7	0.946387	0.667834
JW3195	ECK3215	b3226	nanR	1	1	7	B	13	C		0.755	55540.3	1572037200	0.482	36125	74948.1		0.486	50711.9	2387505600	0.406	44798	110340		0.529	55291.2	2037131100	0.447	45832	102532		53847.8	1569.58	1998891300	2.36181e+08	0.445	0.0219621	42251.7	3077.84		0.59	0.0834286	95940.2	10735.3	0.946387	0.558368
JW3924	ECK3943	b3952	pflC	1	3	7	B	14	C		0.708	43496	914644800	0.469	14889	31746.3		0.672	64757.6	312569100	0.571	5541	9704.03		0.847	70632.9	250862400	0.514	5216	10147.9		59628.8	8242.79	492692100	2.11727e+08	0.518	0.0295127	8548.67	3171.55		0.742333	0.0533552	17199.4	7274.57	0.946387	0.702535
JW4113	ECK4148	b4152	frdC	1	3	8	B	16	C		0.901	59155.9	666225900	0.485	16771	34579.4		0.715	59219.2	1025660700	0.464	18595	40075.4		0.807	68897	1023858900	0.514	23048	44840.5		62424	3236.53	905248500	1.19512e+08	0.487667	0.0144952	19471.3	1864.24		0.807667	0.0536946	39831.8	2964.62	0.946387	0.764365
JW1610	ECK1613	b1618	uidR	1	1	9	B	17	C		0.662	47534.5	1909972800	0.433	40463	93448		0.428	38048.3	3114168300	0.308	53823	174750		0.649	55615	3394836000	0.459	76655	167004		47065.9	5076.46	2806325700	4.55441e+08	0.4	0.0466083	56980.3	10566.3		0.579667	0.0759261	145067	25906.4	0.946387	0.548589
JW0611	ECK0612	b0619	citA	1	3	9	B	18	C		0.979	56736.4	1307592000	0.513	28344	55251.5		0.455	41423.1	2158298100	0.35	34789	99397.1		0.838	62673.3	2472867000	0.521	49484	94978.9		53611	6330.32	1979585700	3.48052e+08	0.461333	0.0557146	37539	6255.58		0.757333	0.156551	83209.2	14036.9	0.946387	0.71673
JW1116	ECK1116	b1130	phoP	1	3	10	B	20	C		0.705	43542.5	1531203300	0.418	32591	77968.9		0.509	37503.4	2579010300	0.328	46623	142143		0.654	51649.4	2387232000	0.444	52624	118523		44231.8	4098.09	2165815200	3.22099e+08	0.396667	0.0351441	43946	5935.91		0.622667	0.0587093	112878	18739.3	0.946387	0.589284
JW0114	ECK0117	b0118	acnB	1	1	11	B	21	C		0.612	50478.7	1603355400	0.454	31658	69731.3		0.442	41152.5	2645739000	0.338	45498	134609		0.673	59932.4	2115118800	0.491	45792	93262.7		50521.2	5421.34	2121404400	3.00927e+08	0.427667	0.0460881	40982.7	4663.11		0.575667	0.0691142	99201.2	18962.6	0.946387	0.544803
JW1877	ECK1889	b1888	cheA	1	3	11	B	22	C		0.813	51542	1610077500	0.496	35623	71820.6		0.425	35269.7	3966001200	0.299	74878	250428		0.595	46718.6	2884438800	0.406	64908	159872		44510.1	4825.48	2820172500	6.80855e+08	0.400333	0.0569395	58469.7	11780.3		0.611	0.112291	160707	51561.2	0.946387	0.578242
JW0712	ECK0711	b0722	sdhD	1	1	12	B	23	C		0.708	53126.7	1003556700	0.456	22222	48732.5		0.519	39933.7	1653268500	0.339	30732	90654.9		0.799	68246.6	337280400	0.519	7555	14556.8		53769	8179.52	998035200	3.79903e+08	0.438	0.0527352	20169.7	6768.86		0.675333	0.0824628	51314.7	22005.5	0.861677	0.581919
JW2214	ECK2213	b2220	atoC	1	3	12	B	24	C		1.186	38741.1	317572200	0.534	4633	8676.03		0.535	32390.7	707365800	0.363	9558	26330.6		1.22	57266.4	141076800	0.555	3227	5814.41		42799.4	7462.16	388671600	1.67294e+08	0.484	0.060803	5806	1919.4		0.980333	0.222883	13607	6415.19	0.740584	0.726019
JW2993	ECK3016	b3025	qseB	1	5	1	B	1	D		0.825	53176	1132008300	0.479	25157	52519.8		0.713	45081.6	2045539800	0.384	41368	107729		0.941	64283.3	1373283000	0.571	30335	53126.1		54180.3	5565.75	1516943700	2.73321e+08	0.478	0.0539846	32286.7	4780.37		0.826333	0.0658213	71125	18302.9	0.740584	0.611969
JW4253	ECK4283	b4293	fecI	1	7	1	B	2	D		0.936	55888.2	522180900	0.499	12711	25472.9		0.742	49902.9	854692200	0.415	17955	43265.1		1.024	64432.3	766801800	0.553	18077	32689		56741.1	4215.88	714558300	9.94786e+07	0.489	0.0401497	16247.7	1768.68		0.900667	0.0833013	33809	5166.58	0.861677	0.776084
JW3839	ECK3861	b3868	glnG	1	5	2	B	3	D		0.849	53207.6	556410600	0.474	13151	27744.7		0.647	48809.1	892308600	0.398	16568	41628.1		0.82	64614.3	811235700	0.519	17968	34620.4		55543.7	4709.73	753318300	1.01197e+08	0.463667	0.0353097	15895.7	1430.61		0.772	0.0630582	34664.4	4007.86	0.946387	0.730611
JW4085	ECK4117	b4124	dcuR	1	5	3	B	5	D		0.899	55601.6	392877000	0.463	9141	19743		0.624	51000.3	589169700	0.4	10269	25672.5		0.868	68549	497015100	0.519	11788	22712.9		58383.7	5253.39	493020600	5.67e+07	0.460667	0.0343721	10399.3	766.897		0.797	0.0869617	22709.5	1711.71	1	0.797
JW1010	ECK1014	b1024	ycdS	1	7	3	B	6	D		0.951	49277.4	86889600	0.513	1266	2467.84		0.684	53186.9	110977200	0.467	1555	3329.76		1.181	76761.1	81934200	0.589	1560	2648.56		59741.8	8584.15	93267000	8.9699e+06	0.523	0.0355715	1460.33	97.1774		0.938667	0.143604	2815.39	262.427	1	0.938667
JW2034	ECK2043	b2049	cpsB	1	5	4	B	7	D		0.76	43652.6	1020581100	0.464	21295	45894.4		0.517	51016.9	447970500	0.444	7688	17315.3		1.004	73329.4	90829800	0.541	1966	3634.01		55999.7	8921.85	519793800	2.70788e+08	0.483	0.0295691	10316.3	5732.47		0.760333	0.140585	22281.2	12449.6	1	0.760333
JW1088	ECK1088	b1102	fhuE	1	7	4	B	8	D		0.885	54603	257041800	0.457	5252	11492.3		0.674	48135.5	392921100	0.386	6808	17637.3		0.895	60431.8	381017700	0.496	8438	17012.1		54390.1	3551.22	343660200	4.34453e+07	0.446333	0.032199	6832.67	919.802		0.818	0.0720578	15380.6	1952.48	1	0.818
JW1375	ECK1377	b1380	ldhA	1	5	5	B	9	D		0.84	53260.6	451717200	0.442	11637	26328.1		0.552	51435.9	725391000	0.409	12896	31530.6		0.857	64837.5	624485700	0.506	14736	29122.5		56511.3	4196.29	600531300	7.99056e+07	0.452333	0.0284742	13089.7	899.83		0.749667	0.0989551	28993.7	1503.22	1	0.749667
JW0790	ECK0794	b0805	fiu	1	7	5	B	10	D		0.903	63134.2	451429200	0.504	9804	19452.4		0.524	48299.9	798733800	0.388	13110	33788.7		0.914	73229.8	823110300	0.546	17277	31642.9		61554.6	7239.83	691091100	1.20037e+08	0.479333	0.0472488	13397	2162.04		0.780333	0.128206	28294.6	4464.31	1	0.780333
JW2334	ECK2331	b2337	yfcT	1	5	6	B	11	D		0.652	44752.5	1372089600	0.41	30302	73907.3		0.465	39073.4	2368040400	0.332	40594	122271		0.739	54494.2	2352612600	0.464	48532	104595		46106.7	4502.8	2030914200	3.29442e+08	0.402	0.0383145	39809.3	5277.15		0.618667	0.0808338	100258	14128.8	1	0.618667
JW3113	ECK3132	b3144	yraJ	1	7	6	B	12	D		0.564	42186.2	1513477800	0.395	28788	72881		0.303	34149.5	2844035100	0.297	45027	151606		0.506	48691.6	1908297900	0.407	39491	97029.5		41675.8	4205.7	2088603600	3.94537e+08	0.366333	0.0348393	37768.7	4766.24		0.457667	0.0791251	107172	23284.9	1	0.457667
JW2096	ECK2102	b2109	yehB	1	5	7	B	13	D		0.675	49149.7	1175004900	0.42	24503	58340.5		0.5	44777.4	1910777400	0.359	31766	88484.7		0.617	56009.4	1701029700	0.446	33755	75683.9		49978.9	3268.79	1595604000	2.18843e+08	0.408333	0.0257833	30008	2811.75		0.597333	0.0514663	74169.7	8734.75	1	0.597333
JW2824	ECK2854	b2856	ygeL	1	7	7	B	14	D		0.529	40035.4	2024582400	0.374	39374	105278		0.394	36832.5	2470181400	0.308	42351	137503		0.552	45527	2508651000	0.399	53428	133905		40798.3	2538.72	2334471600	1.55342e+08	0.360333	0.0271437	45051	4275.75		0.491667	0.0492826	125562	10195	1	0.491667
JW1874	ECK1886	b1885	tap	1	5	8	B	15	D		0.71	49334.3	1198997100	0.432	25947	60062.5		0.487	43592.4	2083710600	0.346	39093	112986		0.667	58768.7	2107056600	0.455	42593	93611		50565.1	4424.02	1796588100	2.98871e+08	0.411	0.0331713	35877.7	5067.09		0.621333	0.0683041	88886.3	15459.1	1	0.621333
JW0243	ECK0255	b0253	ykfA	1	5	9	B	17	D		0.936	58756.6	378025200	0.495	9249	18684.8		0.66	52090.5	626635800	0.419	11657	27821		0.824	65678.8	523105200	0.518	12357	23855.2		58841.9	3922.83	509255400	7.2101e+07	0.477333	0.0299128	11087.7	941.28		0.806667	0.0801443	23453.7	2645.01	1	0.806667
JW1337	ECK1340	b1343	dbpA	1	7	9	B	18	D		1.435	61155.4	507679200	0.567	14858	26204.6		0.595	45714	689069700	0.389	12038	30946		0.799	54587.4	469302300	0.454	10177	22416.3		53818.9	4474.08	555350400	6.77713e+07	0.47	0.0520032	12357.7	1360.71		0.943	0.252951	26522.3	2467.44	1	0.943
JW3367	ECK3391	b3404	envZ	1	5	10	B	19	D		0.631	50834.2	2164397400	0.418	43852	104909		0.388	40062	3468431700	0.309	58740	190097		0.682	60852.2	2893183200	0.484	60522	125045		50582.8	6002.95	2842004100	3.77311e+08	0.403667	0.051024	54371.3	5284.76		0.567	0.0907028	140017	25705.8	1	0.567
JW0145	ECK0148	b0149	mrcB	1	7	10	B	20	D		0.896	55101.2	2267815500	0.516	52162	101089		0.518	42274	4024801800	0.359	75993	211680		0.748	56439.6	3283713000	0.493	76101	154363		51271.6	4515.36	3192110100	5.09262e+08	0.456	0.0489524	68085.3	7961.73		0.720667	0.109972	155711	31931.8	1	0.720667
JW2497	ECK2509	b2513	yfgM	1	5	11	B	21	D		1.191	69515.9	509193000	0.592	12235	20667.2		0.918	64436.8	888160500	0.528	17422	32996.2		1.137	77346.5	752959800	0.62	17883	28843.5		70433.1	3754.82	716771100	1.10885e+08	0.58	0.0272274	15846.7	1810.73		1.082	0.0834686	27502.3	3621.7	1	1.082
JW2629	ECK2646	b2649	ypjB	1	5	12	B	23	D		0.832	49692.8	2019538800	0.475	45595	95989.5		0.735	44518.9	2971635300	0.386	55703	144308		0.836	53002.1	3188925000	0.46	76972	167330		49071.3	2468.51	2726699700	3.59101e+08	0.440333	0.0275096	59423.3	9246.8		0.801	0.0330202	135876	21021.5	0.861677	0.690203
JW2201	ECK2205	b2213	ada	1	1	1	C	1	E		0.672	46256.8	1142406000	0.421	26268	62394.3		0.68	46008.9	1943909100	0.405	42376	104632		0.968	62916.6	1699632900	0.561	43893	78240.6		51727.4	5595.02	1595316000	2.3718e+08	0.462333	0.0495491	37512.3	5639.2		0.773333	0.0973607	81755.7	12319	0.740584	0.572718
JW0885	ECK0893	b0902	pflA	1	3	1	C	2	E		0.937	54993.4	231589800	0.486	4537	9335.39		0.778	51891.3	379222200	0.435	6257	14383.9		1.008	65966.8	340540200	0.544	6926	12731.6		57617.2	4269.76	317117400	4.41977e+07	0.488333	0.0314872	5906.67	711.543		0.907667	0.0679959	12150.3	1486.08	0.861677	0.782115
JW4094	ECK4127	b4133	cadC	1	1	2	C	3	E		0.676	43375.8	1331614800	0.417	28901	69307		0.449	34628.2	2262946500	0.306	42971	140428		0.648	49210.9	1839523500	0.445	37978	85343.8		42405	4237.56	1811361600	2.69221e+08	0.389333	0.0424434	36616.7	4118.3		0.591	0.0714586	98359.6	21537.7	0.946387	0.559315
JW1413	ECK1409	b1416	gapC	1	3	2	C	4	E		0.82	53146	490246200	0.452	11675	25829.6		0.557	48459.7	811855800	0.378	15072	39873		0.842	64359.7	736231500	0.502	17613	35085.7		55321.8	4717.11	679444500	9.70855e+07	0.444	0.0360185	14786.7	1720.08		0.739667	0.0915539	33596.1	4121.82	1	0.739667
JW2361	ECK2360	b2364	dsdC	1	1	3	C	5	E		0.635	40884.7	2387425500	0.407	48929	120219		0.428	33576.5	3616026300	0.303	63087	208208		0.646	55264	4655790900	0.462	101445	219578		43241.7	6370.59	3553080900	6.55577e+08	0.390667	0.0466202	71153.7	15687.4		0.569667	0.0709045	182668	31396.8	1	0.569667
JW1841	ECK1853	b1852	zwf	1	3	3	C	6	E		0.752	53751.5	259893900	0.469	4427	9439.23		0.512	45176.3	390259800	0.374	5555	14852.9		0.701	61424.7	340336800	0.496	7066	14246		53450.9	4692.92	330163500	3.79756e+07	0.446333	0.036997	5682.67	764.483		0.655	0.073	12846	1712.4	1	0.655
JW2805	ECK2835	b2837	galR	1	1	4	C	7	E		0.966	52369.1	456701400	0.432	11337	26243.1		0.574	43002.6	699253200	0.354	12921	36500		0.852	57833.5	674597700	0.453	18993	41927.2		51068.4	4330.41	610184100	7.70707e+07	0.413	0.0301164	14417	2333.24		0.797333	0.116415	34890.1	4598.61	1	0.797333
JW2275	ECK2274	b2280	nuoJ	1	3	4	C	8	E		0.589	41019.8	1533861000	0.384	30717	79992.2		0.434	34922.5	2321642700	0.296	39050	131926		0.613	49162.7	1747545300	0.427	39124	91625.3		41701.6	4124.9	1867683000	2.35213e+08	0.369	0.038553	36297	2790.08		0.545333	0.0560961	101181	15734.8	1	0.545333
JW4221	ECK4257	b4264	idnR	1	1	5	C	9	E		0.731	55898.5	1279573200	0.452	30366	67181.4		0.546	47557.8	1774494000	0.389	31989	82233.9		0.685	58091.2	1787339700	0.446	39761	89150.2		53849.2	3208.74	1613802300	1.67156e+08	0.429	0.0200749	34038.7	2899.27		0.654	0.0556088	79521.9	6485.2	1	0.654
JW2385	ECK2384	b2388	glk	1	3	5	C	10	E		0.89	51871.1	589154400	0.456	14675	32182		0.563	44747	1054809900	0.368	20403	55442.9		0.795	57143	1054319400	0.48	24835	51739.6		51253.7	3591.7	899427900	1.55137e+08	0.434667	0.0340457	19971	2940.88		0.749333	0.0971191	46454.8	7216.04	1	0.749333
JW4079	ECK4111	b4118	melR	1	1	6	C	11	E		0.851	60887.9	324290700	0.507	7258	14315.6		0.581	51308.4	498744900	0.403	8436	20933		0.871	73672.7	386352000	0.559	8544	15284.4		61956.3	6478.1	403129200	5.10545e+07	0.489667	0.0458597	8079.33	411.848		0.767667	0.0935117	16844.3	2063.37	1	0.767667
JW3349	ECK3373	b3386	rpe	1	3	6	C	12	E		0.765	51253.7	607038300	0.456	13980	30657.9		0.303	37761.9	1623963600	0.321	24564	76523.4		0.576	54956.5	589860900	0.466	11957	25658.8		47990.7	5224.9	940287600	3.41874e+08	0.414333	0.0467559	16833.7	3909.04		0.548	0.134101	44280	16186.1	1	0.548
JW0019	ECK0021	b0020	nhaR	1	1	7	C	13	E		0.643	50000.2	654028200	0.425	14963	35207.1		0.508	46723.7	1170405900	0.365	20203	55350.7		0.661	56962.5	921478500	0.458	20875	45578.6		51228.8	3018.86	915304200	1.49097e+08	0.416	0.0272213	18680.3	1868.76		0.604	0.0482804	45378.8	5815.82	1	0.604
JW3928	ECK3947	b3956	ppc	1	3	7	C	14	E		0.672	46404	525036600	0.418	12040	28803.8		0.438	37631.8	929100600	0.305	17492	57350.8		0.678	54897.5	806530500	0.46	17341	37697.8		46311.1	4984.39	753555900	1.19613e+08	0.394333	0.0462829	15624.3	1792.7		0.596	0.079019	41284.2	8433.64	1	0.596
JW4024	ECK4055	b4063	soxR	1	1	8	C	15	E		0.74	51892	916869600	0.462	20146	43606.1		0.465	40308.8	1687939200	0.331	29473	89042.3		0.656	58346.6	1594709100	0.481	33602	69858.6		50182.5	5276.75	1399839300	2.4298e+08	0.424667	0.0471534	27740.3	3979.85		0.620333	0.0813641	67502.3	13169.1	1	0.620333
JW4114	ECK4149	b4153	frdB	1	3	8	C	16	E		0.635	41677.5	1609162200	0.396	32778	82772.7		0.44	37384.6	3052701000	0.311	52315	168215		0.681	52234.7	2026932300	0.447	48128	107669		43765.6	4412.16	2229598500	4.28857e+08	0.384667	0.0396667	44407	5938.8		0.585333	0.07387	119552	25370.8	1	0.585333
JW4287	ECK4315	b4324	uxuR	1	1	9	C	17	E		0.731	52279.8	1147043700	0.451	25477	56490		0.503	40136	2198053800	0.326	37603	115347		0.665	58781.9	1929241800	0.47	38677	82291.5		50399.2	5464.1	1758113100	3.15235e+08	0.415667	0.0451676	33919	4232.37		0.633	0.0677348	84709.4	17033.4	1	0.633
JW0612	ECK0613	b0620	citB	1	3	9	C	18	E		0.737	52238.9	1051284600	0.451	22599	50108.6		0.639	49518.5	1298554200	0.397	23623	59503.8		0.709	61061.9	1590894900	0.487	32632	67006.2		54273.1	3484.06	1313577900	1.55953e+08	0.445	0.0261534	26284.7	3187.4		0.695	0.0291433	58872.9	4888.08	1	0.695
JW0078	ECK0081	b0080	fruR	1	1	10	C	19	E		0.91	54033.7	525447900	0.476	12525	26313		0.573	45075.8	938265300	0.362	17540	48453		0.868	61657.4	718896600	0.507	17258	34039.4		53588.9	4791.86	727536600	1.19248e+08	0.448333	0.0440845	15774.3	1626.7		0.783667	0.106029	36268.5	6487.72	1	0.783667
JW1212	ECK1215	b1221	narL	1	3	10	C	20	E		1.104	72940.1	125534700	0.591	2793	4725.89		0.726	59792.5	204928200	0.486	3705	7623.46		1.042	78245.3	176082300	0.593	3924	6617.2		70326	5484.88	168848400	2.32026e+07	0.556667	0.035338	3474	346.319		0.957333	0.117043	6322.18	849.363	1	0.957333
JW0324	ECK0330	b0333	prpC	1	1	11	C	21	E		0.809	52723.9	1199023200	0.459	28654	62427		0.615	45093.2	1996102800	0.366	39672	108393		0.769	58807.3	1707203700	0.476	40031	84098.7		52208.1	3967.31	1634109900	2.32981e+08	0.433667	0.0341874	36119	3733.94		0.731	0.0591383	84973.1	13276.6	1	0.731
JW1899	ECK1913	b1914	uvrY	1	3	11	C	22	E		0.8	52294.2	974677500	0.452	23100	51106.2		0.616	44157.6	1826982900	0.362	35526	98138.1		0.814	59469.5	1550148300	0.482	36092	74879.7		51973.8	4423.06	1450602900	2.51023e+08	0.432	0.0360555	31572.7	4239.48		0.743333	0.0637948	74708	13577.2	0.946387	0.703481
JW0713	ECK0712	b0723	sdhA	1	1	12	C	23	E		0.847	48528.5	1874671200	0.461	45156	97952.3		0.723	44194.1	3794904900	0.379	71935	189802		0.802	51995.7	3544327800	0.453	84152	185766		48239.5	2256.75	3071301300	6.02672e+08	0.431	0.0261024	67081	11515.8		0.790667	0.0362415	157840	29966.6	0.861677	0.681299
JW2366	ECK2365	b2369	evgA	1	3	12	C	24	E		1.113	61621.7	724906800	0.514	20430	39747.1		0.907	55995.8	1160696700	0.467	28841	61758		1.133	62978.4	1184274900	0.549	30871	56231.3		60198.6	2137.58	1023292800	1.49348e+08	0.51	0.0237557	26714	3196.18		1.051	0.0722311	52578.8	6611.26	0.740584	0.778354
JW2994	ECK3017	b3026	qseC	1	5	1	C	1	F		1.041	58594.8	148002300	0.509	2450	4813.36		0.956	58022.4	269937000	0.498	3911	7853.41		1.155	67514.2	242038800	0.58	5235	9025.86		61377.1	3073	219992700	3.68851e+07	0.529	0.025697	3865.33	804.284		1.05067	0.0576493	7230.88	1255.25	0.740584	0.778107
JW2556	ECK2570	b2572	rseA	1	7	1	C	2	F		0.637	41657.9	2271745800	0.417	47910	114892		0.402	33138.3	4196801700	0.3	81083	270277		0.742	48395.2	3429998100	0.449	76894	171256		41063.8	4414.32	3299515200	5.59532e+08	0.388667	0.0452855	68629	10429.8		0.593667	0.100513	185475	45415.6	0.861677	0.511549
JW3840	ECK3862	b3869	glnL	1	5	2	C	3	F		0.838	51651.5	614807100	0.441	15008	34031.7		0.566	44229.1	1236552300	0.363	26421	72785.1		0.942	60865.7	881839800	0.493	19390	39330.6		52248.8	4811.84	911066400	1.80076e+08	0.432333	0.0377771	20273	3324.1		0.782	0.112095	48715.8	12131.5	0.946387	0.740075
JW2784	ECK2809	b2813	mltA	1	7	2	C	4	F		0.954	57432.1	476911800	0.539	11840	21966.6		0.593	31087.6	1952588700	0.337	34048	101033		1.017	66277.7	134147700	0.522	2931	5614.94		51599.1	10568.9	854549400	5.57865e+08	0.466	0.0646864	16273	9252.13		0.854667	0.132091	42871.4	29461.2	1	0.854667
JW4086	ECK4118	b4125	dcuS	1	5	3	C	5	F		1.034	59633.1	202642200	0.508	3518	6925.2		0.666	52099.7	328528800	0.419	4333	10341.3		0.885	69461.6	298911600	0.548	6464	11795.6		60398.1	5026.52	276694200	3.80003e+07	0.491667	0.0381241	4771.67	878.265		0.861667	0.106871	9687.37	1443.49	1	0.861667
JW3556	ECK3573	b3584	yiaT	1	7	3	C	6	F		0.594	40116	1767777300	0.394	34523	87621.8		0.34	32294.5	2946559500	0.281	46054	163893		0.828	60193	920530800	0.508	23470	46200.8		44201.2	8308.58	1878289200	5.87469e+08	0.394333	0.0655295	34682.3	6519.93		0.587333	0.140913	99238.6	34467.8	1	0.587333
JW3730	ECK3745	b3751	rbsB	1	5	4	C	7	F		0.912	48677.9	1095694200	0.453	25794	56940.4		0.457	36746	2141430300	0.312	37995	121779		0.939	68538.6	1863489600	0.552	40064	72579.7		51320.9	9272.38	1700204700	3.12723e+08	0.439	0.0696348	34617.7	4452.08		0.769333	0.156361	83766.3	19535.1	1	0.769333
JW2121	ECK2126	b2133	dld	1	5	5	C	9	F		0.942	60538.1	295087500	0.5	6640	13280		0.569	49506.2	446137200	0.388	7898	20355.7		0.933	83453.8	342043200	0.619	7551	12198.7		64499.4	9997.96	361089300	4.46321e+07	0.502333	0.0666942	7363	375.122		0.814667	0.122861	15278.1	2557.89	1	0.814667
JW0561	ECK0564	b0572	cusC	1	7	5	C	10	F		0.534	38156.9	1569333600	0.366	29430	80409.8		0.422	36706.9	2006972100	0.311	33736	108476		0.872	64342.8	1082942100	0.527	26606	50485.8		46402.2	8980.06	1553082600	2.66868e+08	0.401333	0.0648083	29924	2073.02		0.609333	0.135254	79790.5	16743.2	1	0.609333
JW2342	ECK2339	b2345	yfdF	1	5	6	C	11	F		1.052	65535.4	210619800	0.546	4601	8426.74		0.665	55328.2	340933500	0.45	6036	13413.3		0.996	79359	269185500	0.626	6407	10234.8		66740.9	6963.23	273579600	3.76824e+07	0.540667	0.0508768	5681.33	550.681		0.904333	0.120754	10691.6	1457.51	1	0.904333
JW2044	ECK2053	b2059	wcaA	1	5	7	C	13	F		0.926	60645.9	119162700	0.499	2754	5519.04		0.767	62231.6	206027100	0.491	3453	7032.59		0.87	76963	158602500	0.57	3461	6071.93		66613.5	5194.95	161264100	2.51109e+07	0.52	0.0251064	3222.67	234.345		0.854333	0.046563	6207.85	442.178	1	0.854333
JW1788	ECK1797	b1799	yeaT	1	7	8	C	16	F		0.587	40681.1	1545244200	0.377	31320	83076.9		0.361	32364.9	3280342500	0.274	56257	205318		0.791	57570.6	1560058200	0.49	37648	76832.7		43538.9	7415.22	2128548300	5.75913e+08	0.380333	0.0623761	41741.7	7484.03		0.579667	0.124184	121742	41826.4	1	0.579667
JW0058	ECK0060	b0059	hepA	1	7	9	C	18	F		1.08	70202.5	71081100	0.639	1528	2391.24		0.95	73588.9	115391700	0.637	2046	3211.93		0.789	70743.1	101619900	0.544	2152	3955.88		71511.5	1050.36	96030900	1.30931e+07	0.606667	0.0313387	1908.67	192.777		0.939667	0.0841632	3186.35	451.855	1	0.939667
JW3393	ECK3416	b3430	glgC	1	5	10	C	19	F		1.001	61115.1	109233900	0.493	2690	5456.39		0.659	51160.4	168840000	0.404	3241	8022.28		0.754	60928.6	142146000	0.463	3500	7559.4		57734.7	3287.59	140073300	1.7238e+07	0.453333	0.0261428	3143.67	238.838		0.804667	0.101925	7012.69	789.538	1	0.804667
JW0157	ECK0160	b0161	degP	1	7	10	C	20	F		0.943	60013.3	122659200	0.5	2985	5970		0.586	53366.4	179982900	0.421	3249	7717.34		1.018	71342.9	159853500	0.569	3868	6797.89		61574.2	5247.73	154165200	1.67906e+07	0.496667	0.0427564	3367.33	261.677		0.849	0.13327	6828.41	504.644	1	0.849
JW0627	ECK0625	b0632	dacA	1	7	11	C	22	F		0.783	44076.7	1905350400	0.443	39350	88826.2		0.606	37433.4	3470535900	0.346	67764	195850		0.749	49090.1	2899728900	0.441	61115	138583		43533.4	3375.95	2758538400	4.57312e+08	0.41	0.0320052	56076.3	8580.6		0.712667	0.0542289	141086	30920.4	0.946387	0.674458
JW1172	ECK1171	b1183	umuD	1	7	12	C	24	F		1	51878.8	1535358600	0.512	30741	60041		0.901	48150.5	2211615900	0.46	40892	88895.7		1.047	61983.1	2267917200	0.563	43025	76421		54004.1	4132.1	2004963900	2.35364e+08	0.511667	0.029734	38219.3	3789.53		0.982667	0.0430284	75119.2	8355.01	0.740584	0.727747
JW4077	ECK4109	b4116	adiY	1	1	1	D	1	G		0.989	39989.7	1020072600	0.478	22110	46255.2		0.751	45627.8	2661330600	0.45	50075	111278		0.838	51828.2	1995400800	0.506	42224	83446.6		45815.2	3418.77	1892268000	4.76588e+08	0.478	0.0161658	38136.3	8327.51		0.859333	0.0695278	80326.5	18835.1	0.740584	0.636409
JW0886	ECK0894	b0903	pflB	1	3	1	D	2	G		0.795	59553.2	1016960400	0.525	19579	37293.3		0.675	51722.7	2252157300	0.441	35998	81628.1		0.921	80262.9	1567305900	0.614	24202	39416.9		63846.3	8513.88	1612141200	3.57275e+08	0.526667	0.0499478	26593	4888.2		0.797	0.0710211	52779.5	14437.3	0.861677	0.686757
JW1966	ECK1982	b1987	cbl	1	1	2	D	3	G		0.701	51240.7	1135538100	0.464	24469	52734.9		0.558	43430.8	1885862700	0.366	35869	98002.7		0.784	61231.8	1484920800	0.508	30822	60673.2		51967.8	5151.53	1502107200	2.1677e+08	0.446	0.0419682	30386.7	3298.09		0.681	0.0660025	70470.3	13955.7	0.946387	0.64449
JW5906	ECK1409	b1417	gapC	1	3	2	D	4	G		0.827	54707.4	851573700	0.481	18753	38987.5		0.526	42845.9	1447468200	0.352	26247	74565.3		0.821	69522.8	1230938100	0.545	25804	47346.8		55692	7716.65	1176660000	1.74148e+08	0.459333	0.0567578	23601.3	2427.54		0.724667	0.0993484	53633.2	10740.6	1	0.724667
JW3046	ECK3065	b3075	ebgR	1	1	3	D	5	G		0.973	84378.2	166831200	0.695	3692	5312.23		0.653	69983.8	265832100	0.579	4267	7369.6		0.982	97835.9	221411700	0.757	5033	6648.61		84066	8041.73	218025000	2.86292e+07	0.677	0.0521664	4330.67	388.42		0.869333	0.108198	6443.48	602.703	1	0.869333
JW1843	ECK1855	b1854	pykA	1	3	3	D	6	G		0.778	49175.5	430812000	0.433	9855	22759.8		0.561	43021.3	803999700	0.356	14090	39578.7		0.946	76706	756785700	0.591	17465	29551.6		56300.9	10356.1	663865800	1.17321e+08	0.46	0.0691689	13803.3	2201.49		0.761667	0.11144	30630	4885.03	1	0.761667
JW2138	ECK2144	b2151	galS	1	1	4	D	7	G		0.687	50920.2	897226200	0.448	19344	43178.6		0.423	38082	1513584900	0.314	25885	82436.3		0.869	75147.5	1281906900	0.572	25384	44377.6		54716.5	10867	1230906000	1.79745e+08	0.444667	0.0744968	23537.7	2101.82		0.659667	0.129472	56664.2	12890.7	1	0.659667
JW2276	ECK2275	b2281	nuoI	1	3	4	D	8	G		0.589	40606.8	1606247100	0.386	32712	84746.1		0.426	35393.8	2852925300	0.306	50121	163794		0.858	70760.4	903066300	0.549	22879	41674		48920.3	11023.3	1787412900	5.70118e+08	0.413667	0.071499	35237.3	7964.81		0.624333	0.125953	96738.1	35759.3	1	0.624333
JW3746	ECK3765	b3773	ilvY	1	1	5	D	9	G		0.699	51680.5	914760000	0.45	20056	44568.9		0.513	39933.5	1454033700	0.334	25648	76790.4		0.842	77501.1	1298942100	0.601	26483	44064.9		56371.7	11095.6	1222578600	1.60289e+08	0.461667	0.0772967	24062.3	2017.62		0.684667	0.0952441	55141.4	10825.5	1	0.684667
JW2447	ECK2458	b2463	maeB	1	3	5	D	10	G		0.821	53355.5	644455800	0.473	15671	33131.1		0.563	43161.8	1141875900	0.365	22115	60589		0.884	76537.6	800812800	0.59	19392	32867.8		57685	9874.97	862381500	1.46856e+08	0.476	0.0649692	19059.3	1867.64		0.756	0.0981988	42196	9196.85	1	0.756
JW3909	ECK3930	b3938	metJ	1	1	6	D	11	G		0.836	54986.4	173206800	0.468	3887	8305.56		0.576	51197.9	251719200	0.42	4636	11038.1		0.918	80813.3	212509800	0.616	4513	7326.3		62332.6	9304.88	212478600	2.26646e+07	0.501333	0.058984	4345.33	231.901		0.776667	0.103088	8889.98	1110.63	1	0.776667
JW3366	ECK3390	b3403	pck	1	3	6	D	12	G		0.928	61906.3	87194700	0.504	2014	3996.03		0.669	53875.1	176741100	0.43	3277	7620.93		1.654	98490.8	134022600	0.712	2913	4091.29		71424.1	13730.5	132652800	2.58589e+07	0.548667	0.0844143	2734.67	375.342		1.08367	0.294805	5236.08	1192.74	1	1.08367
JW0109	ECK0112	b0113	pdhR	1	1	7	D	13	G		0.698	50351.9	464469300	0.448	10599	23658.5		0.552	46274.3	832124700	0.396	14711	37149		0.738	72909	801834300	0.573	16743	29219.9		56511.8	8282.7	699476100	1.17828e+08	0.472333	0.0525241	14017.7	1807.18		0.662667	0.0565253	30009.1	3914.32	1	0.662667
JW3974	ECK4006	b4014	aceB	1	3	7	D	14	G		0.781	54425	656620200	0.478	14291	29897.5		0.48	40845.2	1286916300	0.337	22481	66709.2		0.833	76040.2	1033221600	0.579	20628	35626.9		57103.4	10247.8	992252700	1.831e+08	0.464667	0.0701768	19133.3	2479.55		0.698	0.110029	44077.9	11435.9	1	0.698
JW4023	ECK4054	b4062	soxS	1	1	8	D	15	G		0.751	51110	700578000	0.43	15754	36637.2		0.555	45177.8	1000557000	0.373	18495	49584.5		0.732	74380.1	956271600	0.559	21787	38975		56889.3	8911.48	885802200	9.34903e+07	0.454	0.0550182	18678.7	1744		0.679333	0.0624082	41732.2	3983.7	1	0.679333
JW4115	ECK4150	b4154	frdA	1	3	8	D	16	G		0.824	53757.7	399411000	0.442	9731	22015.8		0.621	48545.3	748301400	0.387	13456	34770		0.896	81936.1	669999600	0.616	16611	26965.9		61413	10371.3	605904000	1.05692e+08	0.481667	0.0690177	13266	1988.36		0.780333	0.0823333	27917.3	3712.42	1	0.780333
JW2396	ECK2399	b2405	xapR	1	1	9	D	17	G		0.948	64827.9	80491500	0.507	1836	3621.3		0.713	55760.2	163760400	0.431	2960	6867.75		0.854	74821.1	134504100	0.562	3206	5704.63		65136.4	5504.55	126252000	2.43892e+07	0.5	0.0379781	2667.33	421.689		0.838333	0.0682894	5397.89	949.635	1	0.838333
JW1702	ECK1710	b1712	ihfA	1	1	10	D	19	G		0.777	50040.1	242641800	0.434	5408	12460.8		0.591	42246.4	335088900	0.348	5971	17158		0.822	58582.7	305143200	0.481	7079	14717.3		50289.8	4717.52	294291300	2.72332e+07	0.421	0.0389401	6152.67	490.854		0.73	0.0707036	14778.7	1356.32	1	0.73
JW1213	ECK1216	b1222	narX	1	3	10	D	20	G		1.044	61001.3	706173300	0.529	15970	30189		0.689	53806.8	1371042900	0.441	25054	56811.8		1.085	73090.9	1144820700	0.59	26571	45035.6		62633	5626.31	1074012300	1.95169e+08	0.52	0.0432474	22531.7	3309.93		0.939333	0.125725	44012.1	7702.35	1	0.939333
JW0419	ECK0423	b0429	cyoD	1	1	11	D	21	G		0.877	54979.7	560540700	0.461	12925	28036.9		0.664	46098.1	1207559700	0.394	22958	58269		0.86	59031.8	1137557700	0.503	27120	53916.5		53369.9	3819.42	968552700	2.05004e+08	0.452667	0.0317403	21001	4212.95		0.800333	0.0683431	46740.8	9435.99	1	0.800333
JW1951	ECK1964	b1968	yedV	1	3	11	D	22	G		0.833	60197.4	165240900	0.639	3328	5208.14		0.617	40434.9	606445200	0.484	9276	19165.3		1.017	84078.2	155489400	0.649	3189	4913.71		61570.2	12617.4	309058500	1.4872e+08	0.590667	0.0534114	5264.33	2006.23		0.822333	0.115593	9762.38	4702.22	0.946387	0.778246
JW0714	ECK0713	b0724	sdhB	1	1	12	D	23	G		0.82	57791.4	937102500	0.512	20419	39880.9		0.708	51896.2	1667194200	0.428	29763	69539.7		0.899	65874.6	1498935600	0.553	29783	53857.1		58520.8	4051.65	1367744100	2.20731e+08	0.497667	0.0367892	26655	3118.01		0.809	0.0554106	54425.9	8566.5	0.861677	0.697097
JW2367	ECK2366	b2370	evgS	1	3	12	D	24	G		1.083	61418.9	1093990500	0.559	27394	49005.4		0.983	54369.9	1819863000	0.485	42910	88474.2		1.021	64000.7	1557731700	0.577	36213	62760.8		59929.8	2878.14	1490528400	2.12218e+08	0.540333	0.0281504	35505.7	4493.02		1.029	0.0291433	66746.8	11566.7	0.740584	0.762061
JW3169	ECK3191	b3202	rpoN	1	5	1	D	1	H		1.068	47728.8	156849300	0.485	1808	3727.84		1.056	54641.4	248931900	0.518	3197	6171.81		1.219	55415	317336400	0.566	5975	10556.5		52595.1	2443.36	241039200	4.64964e+07	0.523	0.023516	3660	1224.98		1.11433	0.0524479	6818.73	1997.64	0.740584	0.825257
JW4252	ECK4282	b4292	fecR	1	7	1	D	2	H		0.908	59038.2	415395000	0.546	9251	16943.2		0.622	38576.2	1891791000	0.374	34034	91000		1.141	72967.1	183591000	0.6	4046	6743.33		56860.5	9987.35	830259000	5.34968e+08	0.506667	0.0681404	15777	9251.33		0.890333	0.150083	38228.9	26549.4	0.861677	0.76718
JW3882	ECK3904	b3911	cpxA	1	5	2	D	3	H		0.792	51692.2	1256463000	0.441	27476	62303.9		0.487	42739.1	1703322900	0.357	30377	85089.6		0.739	56727.4	2409442200	0.474	62751	132386		50386.2	4090.52	1789742700	3.3563e+08	0.424	0.0348281	40201.3	11305.9		0.672667	0.0940857	93259.9	20639.3	0.946387	0.636603
JW2671	ECK2696	b2701	mltB	1	7	2	D	4	H		1.002	55782.2	214333200	0.474	4929	10398.7		0.705	53864.9	368670600	0.428	6212	14514		1.063	81063.4	375570900	0.584	9095	15573.6		63570.2	8764.1	319524900	5.26336e+07	0.495333	0.0462793	6745.33	1231.83		0.923333	0.110578	13495.5	1578.29	1	0.923333
JW4361	ECK4390	b4398	creB	1	5	3	D	5	H		0.613	41678	1175816700	0.405	25420	62765.4		0.359	33901.3	2938910400	0.301	56576	187960		0.896	69321.9	911050200	0.557	21495	38590.7		48300.4	10747.8	1675259100	6.36432e+08	0.421	0.0743326	34497	11097.5		0.622667	0.155094	96438.7	46289.8	1	0.622667
JW1795	ECK1804	b1806	yeaY	1	7	3	D	6	H		0.955	62348.7	266979600	0.502	6118	12187.3		0.562	47603.3	490490100	0.379	8282	21852.2		1.028	95349	368693100	0.734	8557	11658		68433.7	14114.8	375387600	6.46087e+07	0.538333	0.104077	7652.33	771.263		0.848333	0.144709	15232.5	3313.39	1	0.848333
JW1235	ECK1237	b1243	oppA	1	5	4	D	7	H		0.968	55126	306688500	0.477	7979	16727.5		0.646	48942.1	530353800	0.393	10517	26760.8		1.052	88897.6	393742800	0.665	9480	14255.6		64321.9	12416.8	410261700	6.50927e+07	0.511667	0.0804101	9325.33	736.728		0.888667	0.123733	19248	3823.59	1	0.888667
JW2462	ECK2473	b2477	nlpB	1	7	4	D	8	H		0.813	48077.6	728002800	0.43	17934	41707		0.536	42480.7	1318059000	0.358	24303	67885.5		0.9	80080.3	1076997600	0.598	24544	41043.5		56879.5	11712.3	1041019800	1.71282e+08	0.462	0.0711056	22260.3	2164.29		0.749667	0.109746	50212	8838.82	1	0.749667
JW3580	ECK3595	b3605	lldD	1	5	5	D	9	H		1.088	70315.8	119353500	0.596	2527	4239.93		0.845	62926.3	187686900	0.503	3172	6306.16		1.082	93529	168699600	0.698	3373	4832.38		75590.4	9219.49	158580000	2.03647e+07	0.599	0.0563116	3024	255.184		1.005	0.0800187	5126.16	614.29	1	1.005
JW3996	ECK4028	b4036	lamB	1	7	5	D	10	H		0.919	59407.5	319841100	0.493	7436	15083.2		0.703	53836.4	535815900	0.426	10582	24840.4		0.945	85726.7	451790100	0.633	10035	15853.1		66323.5	9833.99	435815700	6.28561e+07	0.517333	0.0609818	9351	970.433		0.855667	0.0767014	18592.2	3131.98	1	0.855667
JW0120	ECK0123	b0124	gcd	1	7	7	D	14	H		0.812	53914.1	647129700	0.476	15683	32947.5		0.598	45255.8	1203711300	0.383	21594	56381.2		0.854	77401.4	998677800	0.605	22404	37031.4		58857.1	9603.11	949839600	1.62516e+08	0.488	0.0643661	19893.7	2118.28		0.754667	0.0792661	42120	7227.39	1	0.754667
JW0945	ECK0953	b0962	helD	1	5	8	D	15	H		0.925	53957.9	293377500	0.46	6734	14639.1		0.624	43046.1	479727000	0.356	9379	26345.5		0.956	74740.5	447488100	0.573	10623	18539.3		57248.2	9296.11	406864200	5.75015e+07	0.463	0.0626605	8912	1146.68		0.835	0.105879	19841.3	3441.48	1	0.835
JW2144	ECK2150	b2157	yeiE	1	7	8	D	16	H		0.58	39936.7	1407321900	0.375	28635	76360		0.434	36192.8	2588060700	0.309	47706	154388		0.835	70295	723636900	0.541	18498	34192.2		48808.2	10797.7	1573006500	5.44551e+08	0.408333	0.0690153	31613	8562.09		0.616333	0.117176	88313.5	35208.6	1	0.616333
JW0144	ECK0147	b0148	hrpB	1	7	9	D	18	H		0.952	61275.1	285070500	0.499	6536	13098.2		0.644	54906.9	484634700	0.425	8835	20788.2		0.951	85545.9	438422400	0.637	10163	15954.5		67242.6	9334.44	402709200	6.03132e+07	0.520333	0.0621217	8511.33	1059.46		0.849	0.1025	16613.6	2244.26	1	0.849
JW2486	ECK2497	b2501	ppk	1	5	10	D	19	H		0.765	58609	553921200	0.493	11906	24150.1		0.479	45206.5	970430400	0.362	15826	43718.2		0.935	82852.6	794142000	0.634	17200	27129.3		62222.7	11016.7	772831200	1.20707e+08	0.496333	0.0785373	14977.3	1586.06		0.726333	0.133048	31665.9	6087.23	1	0.726333
JW0227	ECK0238	b0237	pepD	1	7	10	D	20	H		0.949	59365.2	189810000	0.476	4670	9810.92		0.586	47893.4	366738300	0.364	7430	20412.1		0.981	71448.5	255099600	0.561	6368	11351.2		59569	6800.53	270549300	5.16557e+07	0.467	0.0570468	6156	803.764		0.838667	0.126671	13858.1	3307.04	1	0.838667
JW0823	ECK0829	b0839	dacC	1	7	11	D	22	H		0.82	59814.6	732026700	0.528	16840	31893.9		0.674	50080.9	1389789900	0.431	26529	61552.2		0.906	64086.2	128986200	0.496	2916	5879.03		57993.9	4144.19	750267600	3.64077e+08	0.485	0.0285365	15428.3	6852.93		0.8	0.0677151	33108.4	16082.9	0.946387	0.75711
JW1181	ECK1180	b1192	ldcA	1	7	12	D	24	H		0.111	19677.2	47700000	0.146	1090	7465.75		0.132	26115	215752500	0.199	3053	15341.7		1.294	67994.1	68783400	0.603	1522	2524.05		37928.8	15147.1	110745300	5.28552e+07	0.316	0.144313	1888.33	595.537		0.512333	0.39088	8443.84	3732.32	0.740584	0.379426
JW0553	ECK0556	b0564	appY	1	1	1	E	1	I		0.81	44106.7	1747470600	0.459	38339	83527.2		0.831	41558.9	2411990100	0.421	49701	118055		1.38	67320.4	83079000	0.633	1925	3041.07		50995.3	8195.59	1414179900	6.92644e+08	0.504333	0.0652619	29988.3	14409.9		1.007	0.186598	68207.6	34073.7	0.740584	0.745768
JW1724	ECK1733	b1735	chbR	1	1	2	E	3	I		0.723	45452.1	606699900	0.427	14639	34283.4		0.626	42741	1060214400	0.385	22145	57519.5		0.837	59058.4	1085753700	0.502	27844	55466.1		49083.8	5048.34	917556000	1.55603e+08	0.438	0.0342199	21542.7	3823.83		0.728667	0.0609763	49089.7	7426.84	0.946387	0.689601
JW3232	ECK3251	b3264	envR	1	1	3	E	5	I		0.736	46311.4	428755500	0.425	9597	22581.2		0.588	43391.1	602611200	0.385	10679	27737.7		0.957	79362.9	792102600	0.624	18287	29306.1		56355.1	11534.7	607823100	1.04922e+08	0.478	0.0739076	12854.3	2734.23		0.760333	0.107214	26541.6	2031.33	1	0.760333
JW2011	ECK2024	b2029	gnd	1	3	3	E	6	I		0.631	45994.4	1078608600	0.405	25488	62933.3		0.433	38150.4	2052195300	0.317	40591	128047		0.909	75236.4	1512031500	0.591	32941	55737.7		53127.1	11284.2	1547611800	2.81613e+08	0.437667	0.0807658	33006.7	4359.98		0.657667	0.138055	82239.5	22997.9	1	0.657667
JW2277	ECK2276	b2282	nuoH	1	3	4	E	8	I		0.632	44983.1	1516265100	0.387	32356	83607.2		0.481	38907.3	2592034200	0.312	47822	153276		0.769	79375.9	2266687800	0.584	48240	82602.7		54422.1	12599.6	2124995700	3.18526e+08	0.427667	0.0811097	42806	5226.39		0.627333	0.0831712	106495	23392	1	0.627333
JW0075	ECK0078	b0076	leuO	1	1	5	E	9	I		0.807	53525.8	239898600	0.455	5416	11903.3		0.625	48924.2	389837700	0.393	7133	18150.1		0.943	91125.4	334805400	0.676	7528	11136.1		64525.1	13366.3	321513900	4.37909e+07	0.508	0.0858856	6692.33	648.274		0.791667	0.0921183	13729.8	2221.21	1	0.791667
JW2448	ECK2459	b2464	talA	1	3	5	E	10	I		0.954	51550.5	589221900	0.477	15368	32218		0.692	42003.4	1391768100	0.374	27039	72296.8		0.951	80590.2	1049225400	0.63	26364	41847.6		58048	11603.2	1010071800	2.32501e+08	0.493667	0.0743692	22923.7	3782.86		0.865667	0.0868377	48787.5	12078.9	1	0.865667
JW3804	ECK3822	b3828	metR	1	1	6	E	11	I		0.693	48975.1	303191100	0.44	6112	13890.9		0.407	40263.8	433177200	0.353	6683	18932		0.659	79854.8	729910800	0.637	12246	19224.5		56364.6	12011.3	488759700	1.26279e+08	0.476667	0.0840086	8347	1956.46		0.586333	0.0902022	17349.1	1731.17	1	0.586333
JW3587	ECK3602	b3612	gpmI	1	3	6	E	12	I		0.962	66749.9	109021500	0.522	2403	4603.45		0.686	58226.5	191196000	0.444	3409	7677.93		1.07	100331	153498600	0.765	3385	4424.84		75102.4	12852	151238700	2.37486e+07	0.577	0.0966592	3065.67	331.406		0.906	0.114333	5568.74	1055.85	1	0.906
JW0244	ECK0256	b0254	perR	1	1	7	E	13	I		0.7	51577.6	775953900	0.462	17469	37811.7		0.632	48006.1	1397304900	0.428	26469	61843.5		0.828	78760.7	1222770600	0.608	24988	41098.7		59448.1	9711.18	1132009800	1.8502e+08	0.499333	0.0552127	22975.3	2786.16		0.72	0.0574572	46917.9	7522.84	1	0.72
JW3975	ECK4007	b4015	aceA	1	3	7	E	14	I		0.983	64887.1	142514100	0.533	3275	6144.47		0.675	56802.8	308230200	0.454	5322	11722.5		1.073	91235	273862800	0.676	6208	9183.43		70975	10395.4	241535700	5.0495e+07	0.554333	0.0649675	4935	868.514		0.910333	0.120501	9016.79	1612.38	1	0.910333
JW2644	ECK2663	b2669	stpA	1	1	8	E	15	I		0.965	86251	100712700	0.681	2183	3205.58		0.771	69424.8	165760200	0.567	2976	5248.68		0.991	101221	174077100	0.766	3847	5022.19		85632.4	9184.06	146850000	2.31933e+07	0.671333	0.0576493	3002	480.531		0.909	0.069407	4492.15	646.599	1	0.909
JW4346	ECK4375	b4383	deoB	1	3	8	E	16	I		0.932	67063.1	134561700	0.522	2750	5268.2		0.681	55613.2	253210500	0.424	4297	10134.4		0.943	92181.8	165222900	0.681	3792	5568.28		71619.4	10799.4	184331700	3.55586e+07	0.542333	0.0748829	3613	455.461		0.852	0.0855589	6990.31	1574.45	1	0.852
JW3254	ECK3279	b3292	zntR	1	1	9	E	17	I		0.794	54335.2	831641400	0.473	19282	40765.3		0.574	43433.2	1701799200	0.354	31480	88926.6		0.855	80619.5	1231263000	0.637	26200	41130.3		59462.6	11036.6	1254901200	2.51471e+08	0.488	0.0820386	25654	3531.83		0.741	0.0853366	56940.7	15993.3	1	0.741
JW0683	ECK0683	b0695	kdpD	1	3	9	E	18	I		0.926	59935.8	266916600	0.499	7098	14224.4		0.543	48243.7	898148700	0.372	19556	52569.9		0.867	80331.9	146448000	0.595	3444	5788.24		62837.1	9375.98	437171100	2.33098e+08	0.488667	0.0645816	10032.7	4877.1		0.778667	0.119058	24194.2	14395.3	1	0.778667
JW3732	ECK3747	b3753	rbsR	1	1	10	E	19	I		0.932	63880.3	223781400	0.5	5555	11110		0.684	51995.8	389778300	0.409	8036	19647.9		0.908	88215.9	352632600	0.675	8893	13174.8		68030.7	10659.8	322064100	5.02977e+07	0.528	0.0780534	7494.67	1000.89		0.841333	0.0789712	14644.2	2571.86	1	0.841333
JW1223	ECK1230	b1235	rssB	1	3	10	E	20	I		0.822	58843.5	1426556700	0.49	45322	92493.9		0.682	52844.8	2837899800	0.42	71291	169740		0.941	74673.7	1659938400	0.576	49653	86203.1		62120.7	6511.01	1974798300	4.36778e+08	0.495333	0.0451122	55422	8032.4		0.815	0.0748487	116146	26858.8	1	0.815
JW0420	ECK0424	b0430	cyoC	1	1	11	E	21	I		0.897	57391.6	146587500	0.466	3416	7330.47		0.75	52206.7	253566000	0.418	5035	12045.5		0.983	65133.8	196303500	0.519	4515	8699.42		58244	3756.01	198819000	3.09076e+07	0.467667	0.0291681	4322	477.224		0.876667	0.0680253	9358.45	1400.42	1	0.876667
JW0715	ECK0714	b0726	sucA	1	1	12	E	23	I		0.764	51457.4	1028402100	0.464	23306	50228.4		0.792	49631.4	1948601700	0.43	40094	93241.9		0.863	59839.2	1433516400	0.512	32047	62591.8		53642.7	3142.79	1470173400	2.6627e+08	0.468667	0.0237861	31815.7	4847.66		0.806333	0.0294637	68687.4	12785.5	0.861677	0.694799
JW2453	ECK2464	b2469	narQ	1	3	12	E	24	I		1.106	62462	284546700	0.548	7921	14454.4		0.997	59812.2	397813500	0.496	9371	18893.1		1.069	62992.6	318558600	0.55	8341	15165.5		61755.6	983.7	333639600	3.35555e+07	0.531333	0.0176761	8544.33	430.749		1.05733	0.0320017	16171	1376.47	0.740584	0.783044
JW5536	ECK3200	b3210	arcB	1	5	1	E	1	J		0.917	49880.5	1171399500	0.597	23509	39378.6		0.981	52188.8	1620180900	0.601	30987	51559.1		1.439	54504.5	151825500	0.621	2616	4212.56		52191.3	1334.84	981135300	4.34422e+08	0.606333	0.00742369	19037.3	8489.7		1.11233	0.164375	31716.7	14194.5	0.740584	0.823776
JW3883	ECK3905	b3912	cpxR	1	5	2	E	3	J		0.733	43767.8	1287297000	0.415	27838	67079.5		0.611	40193.9	1971534600	0.35	39703	113437		0.766	56387	1674854100	0.464	37128	80017.2		46782.9	4911.62	1644561900	1.98102e+08	0.409667	0.0330168	34889.7	3603.34		0.703333	0.0471393	86844.6	13810.8	0.946387	0.665626
JW4362	ECK4391	b4399	creC	1	5	3	E	5	J		0.672	49144	1010367900	0.442	21383	48377.8		0.482	41634.7	1657777500	0.351	30081	85700.9		0.88	81692.2	1488651300	0.616	30115	48888		57490.3	12293.6	1385598900	1.93864e+08	0.469667	0.0777396	27193	2905.02		0.678	0.114932	60988.9	12356.9	1	0.678
JW3474	ECK3490	b3506	slp	1	7	3	E	6	J		0.541	39743.3	1474677000	0.378	28858	76343.9		0.378	32644.3	2826502200	0.285	48135	168895		0.95	76132.5	827323200	0.588	21068	35829.9		49506.7	13469.7	1709500800	5.88936e+08	0.417	0.0896158	32687	8044.7		0.623	0.170136	93689.5	39379.4	1	0.623
JW3077	ECK3097	b3106	yhaK	1	5	4	E	7	J		0.815	59036.8	523404000	0.487	10948	22480.5		0.632	50901.3	967409100	0.408	17463	42801.5		0.984	95988.1	668053800	0.702	14031	19987.2		68642.1	13873.2	719622300	1.30741e+08	0.532333	0.0878452	14147.3	1881.62		0.810333	0.10164	28423	7225.15	1	0.810333
JW0940	ECK0948	b0957	ompA	1	7	4	E	8	J		0.626	45658.7	1329165900	0.411	27791	67618		0.458	36984	2569007700	0.318	46169	145186		0.864	78434.4	1753863300	0.599	35321	58966.6		53692.3	12621.9	1884012300	3.63779e+08	0.442667	0.0826485	36427	5334.01		0.649333	0.117781	90590.1	27411.7	1	0.649333
JW0675	ECK0676	b0688	pgm	1	5	5	E	9	J		0.711	44468.1	1091580300	0.411	24433	59447.7		0.532	35011.5	2059863300	0.312	38670	123942		0.887	79160.9	1260860400	0.633	27686	43737.8		52880.2	13420.9	1470768000	2.98574e+08	0.452	0.0949052	30263	4307.12		0.71	0.102481	75709.3	24539.2	1	0.71
JW1499	ECK1498	b1505	ydeT	1	7	5	E	10	J		0.616	46043.6	1680977700	0.426	36562	85826.3		0.36	33508.3	2126533500	0.289	36730	127093		1.081	85781.1	479154600	0.654	12365	18906.7		55111	15756.2	1428888600	4.91978e+08	0.456333	0.106452	28552.3	8093.81		0.685667	0.211029	77275.5	31522.1	1	0.685667
JW0564	ECK0567	b0575	cusA	1	5	6	E	11	J		0.639	40451.8	1272140100	0.383	26569	69370.8		0.655	44481	1507797900	0.393	29601	75320.6		1.003	79578.1	573206400	0.626	14624	23361		54837	12425.1	1117714800	2.80625e+08	0.467333	0.0793858	23598	4571.57		0.765667	0.118757	56017.5	16418.3	1	0.765667
JW2762	ECK2785	b2791	yqcB	1	7	6	E	12	J		0.652	42519.8	1254727800	0.404	26092	64584.2		0.484	36099	2091760200	0.312	36135	115817		0.897	74091.4	939234600	0.574	23895	41628.9		50903.4	11741.2	1428574200	3.43873e+08	0.43	0.076742	28707.3	3767.6		0.677667	0.119912	74010.1	21928.8	1	0.677667
JW5905	ECK1406	b1413	hrpA	1	5	8	E	15	J		0.891	57636.9	177815700	0.486	3764	7744.86		0.727	50218.6	356982300	0.411	6366	15489.1		0.973	86689.4	269909100	0.643	5676	8827.37		64848.3	11128.6	268235700	5.17277e+07	0.513333	0.0683528	5268.67	778.255		0.863667	0.0723172	10687.1	2421.23	1	0.863667
JW0318	ECK0324	b0326	yahL	1	5	9	E	17	J		0.914	66250.9	188127000	0.511	4340	8493.15		0.664	49413.3	335131200	0.391	6477	16565.2		0.922	88235.9	249523200	0.652	5834	8947.85		67966.7	11239.9	257593800	4.26279e+07	0.518	0.0754255	5550.33	632.994		0.833333	0.0846982	11335.4	2618.2	1	0.833333
JW1645	ECK1649	b1653	lhr	1	7	9	E	18	J		0.975	63712	173728800	0.507	4347	8573.96		0.659	46522.6	357149700	0.383	7344	19174.9		0.991	86484.1	229818600	0.662	5522	8341.39		65572.9	11573.4	253565700	5.4264e+07	0.517333	0.0807059	5737.67	871.854		0.875	0.108099	12030.1	3573.05	1	0.875
JW2293	ECK2290	b2296	ackA	1	5	10	E	19	J		0.802	54101.6	344306700	0.476	7392	15529.4		0.566	44842.6	655509600	0.373	11612	31131.4		1.027	81016.6	411679800	0.645	9705	15046.5		59986.9	10849.2	470498700	9.45279e+07	0.498	0.0792864	9569.67	1220.09		0.798333	0.133092	20569.1	5282.97	1	0.798333
JW0322	ECK0328	b0330	prpR	1	7	10	E	20	J		0.575	40714.5	1139233500	0.381	22347	58653.5		0.362	32316.8	2442853800	0.281	43392	154420		0.872	75926.9	807921000	0.599	20011	33407.3		49652.7	13358.9	1463336100	4.9901e+08	0.420333	0.0938817	28583.3	7434.98		0.603	0.147888	82160.3	36857.5	1	0.603
JW2585	ECK2601	b2604	yfiN	1	5	11	E	21	J		0.874	66078.4	251351100	0.517	5253	10160.5		0.669	56757	481547700	0.434	8254	19018.4		0.96	73668	331991100	0.56	7816	13957.1		65501.1	4890.31	354963300	6.74374e+07	0.503667	0.036979	7107.67	935.914		0.834333	0.086314	14378.7	2565.73	1	0.834333
JW0840	ECK0847	b0856	potH	1	7	11	E	22	J		0.687	43521.7	1233487800	0.426	24400	57277		0.548	42136.3	3062540700	0.378	60211	159288		0.703	49931.7	1783744200	0.447	38335	85760.6		45196.6	2401.12	2026590900	5.41784e+08	0.417	0.0204206	40982	10422.1		0.646	0.0492172	100775	30390	0.946387	0.611366
JW2633	ECK2652	b2658	yqaD	1	5	12	E	23	J		1.312	72131.9	280266300	0.624	6538	10477.6		0.843	62799.8	502120800	0.511	9725	19031.3		1.008	72451.7	408686400	0.579	9380	16200.3		69127.8	3165.34	397024500	6.43088e+07	0.571333	0.0328448	8547.67	1009.76		1.05433	0.137356	15236.4	2515.85	0.861677	0.908495
JW1264	ECK1266	b1272	sohB	1	7	12	E	24	J		1.359	55417.9	98569800	0.551	2448	4442.83		1.163	55565.9	140384700	0.519	2260	4354.53		1.124	59772	61731000	0.544	1520	2794.12		56918.6	1427.33	100228500	2.27205e+07	0.538	0.00971253	2076	283.248		1.21533	0.0727102	3863.83	535.461	0.740584	0.900056
JW3206	ECK3226	b3237	argR	1	1	1	F	1	K		0.718	48053.1	1254648600	0.458	24568	53641.9		0.721	53390	1828841400	0.476	35914	75449.6		1.024	63769.4	1642207500	0.588	37689	64096.9		55070.8	4614.1	1575232500	1.69104e+08	0.507333	0.0406667	32723.7	4109.9		0.821	0.101504	64396.1	6297.11	0.740584	0.608019
JW0960	ECK0969	b0978	appC	1	3	1	F	2	K		0.781	48166.5	1057457700	0.442	25252	57131.2		0.61	39150.1	1729331100	0.338	35181	104086		0.981	61441.7	1163315700	0.517	28568	55257.3		49586.1	6474.05	1316701500	2.08566e+08	0.432333	0.0518984	29667	2918.45		0.790667	0.107207	72158.1	15973	0.861677	0.681299
JW5702	ECK3345	b3357	crp	1	1	2	F	3	K		0.684	50031.8	658213200	0.448	14418	32183		0.609	46326.6	1020822300	0.391	20769	53117.6		0.719	63115.3	1147907700	0.514	25148	48926.1		53157.9	5092.29	942314400	1.46712e+08	0.451	0.0355387	20111.7	3114.87		0.670667	0.0324465	44742.3	6395.12	0.946387	0.63471
JW1603	ECK1606	b1611	fumC	1	3	2	F	4	K		0.822	63272.7	323847900	0.528	6315	11960.2		0.65	50138.4	1176092100	0.416	21823	52459.1		0.84	78598.4	215789400	0.59	4564	7735.59		64003.2	8223.83	571909800	3.03697e+08	0.511333	0.0509161	10900.7	5484.51		0.770667	0.0605567	24051.7	14256	1	0.770667
JW0555	ECK0558	b0566	envY	1	1	3	F	5	K		0.466	37639.3	1610017200	0.363	28601	78790.6		0.378	32704.9	2464997400	0.294	42046	143014		0.838	74566.5	1549217700	0.6	32952	54920		48303.6	13208.5	1874744100	2.95648e+08	0.419	0.0926661	34533	3960.92		0.560667	0.140974	92241.4	26304.7	1	0.560667
JW2198	ECK2202	b2210	mqo	1	3	3	F	6	K		0.789	56516.7	491234400	0.483	10347	21422.4		0.693	46904.7	790039800	0.385	15164	39387		0.908	89982.1	631284300	0.677	14022	20712		64467.8	13055.4	637519500	8.6314e+07	0.515	0.0857982	13177.7	1453.22		0.796667	0.0621834	27173.8	6110.06	1	0.796667
JW0895	ECK0903	b0912	ihfB	1	1	4	F	7	K		0.652	52496.5	1129517100	0.469	22449	47865.7		0.556	41742.8	2086794900	0.365	36544	100121		0.782	83524.9	1354910400	0.651	24582	37760.4		59254.7	12525.8	1523740800	2.88948e+08	0.495	0.0835783	27858.3	4386.27		0.663333	0.0654862	61915.5	19324	1	0.663333
JW2278	ECK2277	b2283	nuoG	1	3	4	F	8	K		0.593	43137.7	1472472900	0.388	30503	78616		0.48	36905.7	2148974100	0.335	36844	109982		0.809	81224.7	1345847400	0.643	31417	48860		53756	13851.7	1655764800	2.49299e+08	0.455333	0.0950725	32921.3	1979		0.627333	0.0965131	79152.7	17646.5	1	0.627333
JW0872	ECK0880	b0889	lrp	1	1	5	F	9	K		0.73	53698.1	860436900	0.479	18787	39221.3		0.628	45526.1	1562365800	0.399	27636	69263.2		0.685	83529.8	1496539800	0.644	31971	49644.4		60918	11549.4	1306447500	2.23813e+08	0.507333	0.0721303	26131.3	3879.54		0.681	0.0295127	52709.6	8806.72	1	0.681
JW2449	ECK2460	b2465	tktB	1	3	5	F	10	K		1.057	67049.5	145586700	0.559	3115	5572.45		0.824	58463	221093100	0.47	3735	7946.81		1.011	94576.5	186868800	0.705	4045	5737.59		73363	10892.5	184516200	2.18285e+07	0.578	0.0685006	3631.67	273.394		0.964	0.0712484	6418.95	765.416	1	0.964
JW0337	ECK0343	b0346	mhpR	1	1	6	F	11	K		0.672	45549.5	1021468500	0.418	21814	52186.6		0.555	39264.8	1941177600	0.333	33125	99474.5		0.766	78928.4	1335783600	0.61	26687	43749.2		54580.9	12308.2	1432809900	2.69893e+08	0.453667	0.0819275	27208.7	3275.61		0.664333	0.061031	65136.8	17340.8	1	0.664333
JW3887	ECK3908	b3916	pfkA	1	3	6	F	12	K		0.745	51944.9	347272200	0.464	8138	17538.8		0.641	43188.8	648640800	0.382	11997	31405.8		0.725	78999.3	513210600	0.649	11241	17320.5		58044.3	10778.1	503041200	8.71461e+07	0.498333	0.0789648	10458.7	1180.68		0.703667	0.0318608	22088.3	4659.13	1	0.703667
JW4063	ECK4095	b4102	phnF	1	1	7	F	13	K		0.739	52464.8	735886800	0.464	16470	35495.7		0.621	43604.7	1500454800	0.371	26626	71768.2		0.864	82722.1	1021455000	0.642	20420	31806.9		59597.2	11842	1085932200	2.23054e+08	0.492333	0.0795033	21172	2955.8		0.741333	0.0701578	46356.9	12750.2	1	0.741333
JW3985	ECK4017	b4025	pgi	1	3	7	F	14	K		0.835	54145.5	376058700	0.481	7505	15602.9		0.62	49799.2	1054712700	0.419	16392	39121.7		0.759	81519.4	1432806300	0.642	26659	41524.9		61821.4	9928.59	954525900	3.09142e+08	0.514	0.0664555	16852	5534.07		0.738	0.0629471	32083.2	8269.29	1	0.738
JW3089	ECK3107	b3118	tdcA	1	1	8	F	15	K		0.72	51642.5	793593900	0.453	17054	37646.8		0.574	43361.6	1870309800	0.363	34054	93812.7		0.763	81068.2	1452992400	0.615	27849	45282.9		58690.8	11441.2	1372298700	3.13429e+08	0.477	0.0737292	26319	4966.75		0.685667	0.0571965	58914.1	17588	1	0.685667
JW4358	ECK4387	b4395	ytjC	1	3	8	F	16	K		1.019	63323.9	317014200	0.542	7267	13407.7		0.727	59349.3	544330800	0.478	10718	22422.6		0.923	95810	471940200	0.711	10813	15208.2		72827.8	11548.3	444428400	6.7047e+07	0.577	0.0695006	9599.33	1166.49		0.889667	0.085925	17012.8	2754.36	1	0.889667
JW0198	ECK0208	b0208	yafC	1	1	9	F	17	K		0.812	54075.2	695016000	0.477	15716	32947.6		0.689	45752.7	1367903700	0.39	27431	70335.9		0.85	82647.9	1018236600	0.629	22617	35957.1		60825.3	11172.7	1027052100	1.94296e+08	0.498667	0.0698387	21921.3	3399.67		0.783667	0.0485878	46413.5	11992.7	1	0.783667
JW0797	ECK0801	b0812	dps	1	3	9	F	18	K		0.69	49768.3	933962400	0.447	19471	43559.3		0.472	39029.7	1903157100	0.327	35007	107055		0.723	75216.7	1180458000	0.584	23593	40399		54671.5	10730.1	1339192500	2.90822e+08	0.452667	0.0742436	26023.7	4646.61		0.628333	0.078745	63671.1	21711.1	1	0.628333
JW1901	ECK1915	b1916	sdiA	1	1	10	F	19	K		0.791	54585.4	807596100	0.483	17291	35799.2		0.581	42755.3	1546617600	0.357	29497	82624.6		0.913	84231.2	1171888200	0.644	25070	38928.6		60523.9	12335.7	1175367300	2.13344e+08	0.494667	0.0830549	23952.7	3567.58		0.761667	0.0969559	52450.8	15113.9	1	0.761667
JW1600	ECK1603	b1608	rstA	1	3	10	F	20	K		0.873	59721.9	215618400	0.521	4770	9155.47		0.671	40474	969789600	0.396	16373	41346		1.098	83299.4	174201300	0.624	3745	6001.6		61165.1	12383.7	453203100	2.5857e+08	0.513667	0.06592	8296	4049.33		0.880667	0.123324	18834.3	11292.6	1	0.880667
JW0421	ECK0425	b0431	cyoB	1	1	11	F	21	K		0.679	47010.2	952596000	0.416	20379	48988		0.448	37653.5	1759118400	0.311	35114	112907		0.77	62247.2	1284515100	0.515	29417	57120.4		48970.3	7166.93	1332076500	2.34034e+08	0.414	0.0588982	28303.3	4289.92		0.632333	0.0958372	73005	20088.5	1	0.632333
JW2063	ECK2074	b2078	baeS	1	3	11	F	22	K		0.904	58589.4	389960100	0.476	8832	18554.6		0.787	54436.8	694290600	0.431	13335	30939.7		0.978	63197.5	776890800	0.521	17560	33704.4		58741.2	2530.13	620380500	1.17652e+08	0.476	0.0259808	13242.3	2519.98		0.889667	0.0556008	27732.9	4658.03	1	0.889667
JW0716	ECK0715	b0727	sucB	1	1	12	F	23	K		1.141	71056.3	55091700	0.575	1106	1923.48		0.951	68941	114507000	0.556	1606	2888.49		1.082	72177.8	87741900	0.542	2002	3693.73		70725	948.939	85780200	1.71797e+07	0.557667	0.00956266	1571.33	259.233		1.058	0.0561456	2835.23	511.72	0.861677	0.911654
JW2538	ECK2551	b2554	yfhA	1	3	12	F	24	K		1.313	54942	205652700	0.602	4609	7656.15		0.508	34085.9	1164284100	0.375	18744	49984		1.429	74936.9	41320800	0.616	949	1540.58		54654.9	11793.5	470419200	3.50161e+08	0.531	0.0781046	8100.67	5425.54		1.08333	0.289609	19726.9	15231.2	0.740584	0.802299
JW3368	ECK3392	b3405	ompR	1	5	1	F	1	L		0.011	12427	112804200	0.075	1980	26400		0.022	13313.7	194800500	0.081	3211	39642		0.027	14305.3	119163600	0.085	2441	28717.6		13348.7	542.501	142256100	2.63363e+07	0.0803333	0.00290593	2544	359.071		0.02	0.00472582	31586.5	4082.91	0.740584	0.0148117
JW1656	ECK1660	b1664	ydhQ	1	7	1	F	2	L		0.619	38756.2	1853898300	0.408	41062	100642		0.315	27443.7	3545396100	0.235	68237	290370		0.761	49367.5	1866437100	0.459	39315	85653.6		38522.5	6329.94	2421910500	5.61754e+08	0.367333	0.0677848	49538	9363.09		0.565	0.13155	158889	65883	0.861677	0.486848
JW3967	ECK3995	b4003	zraS	1	5	2	F	3	L		0.655	45604.3	1701613800	0.452	30191	66794.2		0.489	37134.8	2620065600	0.336	43257	128741		0.609	55902.5	2051680500	0.488	38589	79075.8		46213.9	5426.34	2124453300	2.67619e+08	0.425333	0.0458597	37345.7	3822.72		0.584333	0.0494818	91537	18936.9	1	0.584333
JW0731	ECK0730	b0741	pal	1	7	2	F	4	L		0.508	37327.8	1820124900	0.376	31313	83279.3		0.425	34191.4	2617783200	0.312	43525	139503		0.701	60549.1	2021607900	0.515	39917	77508.7		44022.8	8312.64	2153172000	2.39476e+08	0.401	0.0599194	38251.7	3622.3		0.544667	0.0817564	100097	19773.4	1	0.544667
JW4364	ECK4393	b4401	arcA	1	5	3	F	5	L		0.744	46842.8	302616900	0.427	5943	13918		0.597	43104.9	447001200	0.37	7908	21373		0.903	84227	452155500	0.619	9436	15243.9		58058.2	13128.8	400591200	4.90097e+07	0.472	0.0753193	7762.33	1010.97		0.748	0.0883572	16845	2296.12	1	0.748
JW1644	ECK1648	b1652	rnt	1	5	4	F	7	L		0.677	45403.7	1380406500	0.429	29669	69158.5		0.545	37248.9	2619656100	0.344	50903	147974		0.887	79521	1923048900	0.627	41382	66000		54057.9	12947.4	1974370500	3.5866e+08	0.466667	0.0838378	40651.3	6140.61		0.703	0.0995791	94377.4	26813.7	1	0.703
JW2203	ECK2207	b2215	ompC	1	7	4	F	8	L		0.782	54086.7	2298230100	0.454	61360	135154		0.467	44447	4569422400	0.347	94557	272499		0.875	84405.8	2466835200	0.629	61928	98454.7		60979.8	12039	3111495900	7.30586e+08	0.476667	0.0821915	72615	10972.2		0.708	0.123454	168702	52968.3	1	0.708
JW0710	ECK0709	b0720	gltA	1	5	5	F	9	L		0.688	48012.9	1090677600	0.443	23647	53379.2		0.537	41367.3	2051446500	0.363	38504	106072		0.852	82281.2	1395794700	0.634	28709	45282.3		57220.5	12676.4	1512639600	2.83437e+08	0.48	0.0803886	30286.7	4360.79		0.692333	0.0909585	68244.4	19057.5	1	0.692333
JW4275	ECK4303	b4312	fimB	1	7	5	F	10	L		0.853	51737.6	139903200	0.458	3231	7054.59		0.741	45749.5	267471000	0.398	4758	11954.8		1.034	83867	194776200	0.639	4272	6685.45		60451.4	11834.8	200716800	3.69452e+07	0.498333	0.0724346	4087	450.408		0.876	0.08536	8564.94	1698.27	1	0.876
JW1771	ECK1780	b1782	mipA	1	5	6	F	11	L		0.767	52711.7	762972300	0.472	17805	37722.5		0.578	41698.3	1627704000	0.353	29695	84121.8		0.847	81462.6	910798200	0.629	20279	32240.1		58624.2	11853.5	1100491500	2.67038e+08	0.484667	0.0799257	22593	3622.11		0.730667	0.0797503	51361.4	16456.5	1	0.730667
JW2815	ECK2845	b2847	yqeI	1	7	6	F	12	L		0.908	63665.6	141203700	0.517	3005	5812.38		0.75	55588.7	268821900	0.449	4610	10267.3		0.959	92024.3	232284600	0.689	4742	6882.44		70426.2	11047.9	214103400	3.79452e+07	0.551667	0.0714174	4119	558.302		0.872333	0.0629135	7654.03	1342.63	1	0.872333
JW3285	ECK3310	b3323	gspA	1	5	7	F	13	L		0.88	64576.3	155900700	0.518	3233	6241.31		0.705	54095.4	279410400	0.425	4600	10823.5		0.935	89749.6	215699400	0.665	4046	6084.21		69473.8	10579.8	217003500	3.56601e+07	0.536	0.0698642	3959.67	396.973		0.84	0.0693421	7716.35	1554.25	1	0.84
JW4195	ECK4231	b4236	cybC	1	7	7	F	14	L		1.016	66915.5	94568400	0.536	1453	2710.82		0.8	56906.8	194996700	0.467	3109	6657.39		1.115	88926	159958800	0.684	3264	4771.93		70916.1	9457.11	149841300	2.94292e+07	0.562333	0.0640113	2608.67	579.563		0.977	0.093	4713.38	1139.65	1	0.977
JW0764	ECK0770	b0781	moaA	1	5	8	F	15	L		0.956	66946.6	88739100	0.546	1725	3159.34		0.687	47306.5	193347900	0.439	3238	7375.85		0.977	89358.9	141795000	0.652	2824	4331.29		67870.7	12148.3	141294000	3.0199e+07	0.545667	0.061488	2595.67	451.44		0.873333	0.0933637	4955.49	1256.58	1	0.873333
JW3557	ECK3574	b3585	yiaU	1	7	8	F	16	L		0.889	59593.4	189835200	0.5	4300	8600		0.669	50973.2	322370100	0.41	6090	14853.7		1.053	91877.3	285876000	0.674	6429	9538.58		67481.3	12449.2	266027100	3.95258e+07	0.528	0.0774855	5606.33	660.457		0.870333	0.111243	10997.4	1947.07	1	0.870333
JW0110	ECK0113	b0114	aceE	1	5	9	F	17	L		0.603	47312	1093395600	0.416	23710	56995.2		0.507	39685.6	2259532800	0.334	42373	126865		0.773	74298.5	1900453500	0.556	40137	72188.8		53765.4	10500	1751127300	3.44815e+08	0.435333	0.0648108	35406.7	5883.85		0.627667	0.0777717	85349.8	21216.1	1	0.627667
JW3753	ECK3772	b3780	rhlB	1	7	9	F	18	L		1.037	66601.5	136916100	0.521	2930	5623.8		0.774	51431.9	253081800	0.422	4865	11528.4		1.063	88034.2	234330300	0.674	5126	7605.34		68689.2	10617.6	208109400	3.60059e+07	0.539	0.0733008	4307	692.61		0.958	0.0923057	8252.53	1734.97	1	0.958
JW2369	ECK2368	b2372	yfdV	1	5	10	F	19	L		0.895	57913.6	420429600	0.483	9400	19461.7		0.691	50407.7	634019400	0.411	13215	32153.3		1.008	89488.4	504369900	0.668	11414	17086.8		65936.6	11973.6	519606300	6.21269e+07	0.520667	0.0765427	11343	1101.87		0.864667	0.0927583	22900.6	4676.86	1	0.864667
JW0427	ECK0431	b0437	clpP	1	7	10	F	20	L		0.563	44381.2	1830429000	0.406	33909	83519.7		0.422	34814	3097912500	0.297	57581	193875		0.617	65717.6	2059960500	0.517	43132	83427.5		48304.3	9134.19	2329434000	3.8991e+08	0.406667	0.0635094	44874	6888.8		0.534	0.0581292	120274	36800.6	1	0.534
JW0866	ECK0873	b0882	clpA	1	7	11	F	22	L		0.845	54630.8	1013298300	0.487	23457	48166.3		0.876	51451.7	1641350700	0.449	36152	80516.7		1.194	70158.5	1569075300	0.591	39816	67370.6		58747	5779.1	1407908100	1.98405e+08	0.509	0.0424421	33141.7	4956.5		0.971667	0.111526	65351.2	9393.17	0.946387	0.919573
JW3721	ECK3737	b3743	asnC	1	1	1	G	1	M		0.491	34242.6	1797246000	0.345	31902	92469.6		0.491	32146.9	2590289100	0.311	44968	144592		1.061	64160	1207973700	0.576	25644	44520.8		43516.5	10339.5	1865169600	4.00483e+08	0.410667	0.0832473	34171.3	5692.59		0.681	0.19	93860.7	28896.3	0.740584	0.504338
JW0961	ECK0970	b0979	appB	1	3	1	G	2	M		0.842	56199.5	824189400	0.516	13714	26577.5		0.621	47143.3	1391468400	0.4	20092	50230		1.031	70777.7	1191850200	0.6	22811	38018.3		58040.2	6884.45	1135836000	1.66137e+08	0.505333	0.0579808	18872.3	2695.96		0.831333	0.118477	38275.3	6829.09	0.861677	0.716341
JW1023	ECK1026	b1040	csgD	1	1	2	G	3	M		0.598	37569.2	1661995800	0.397	30235	76158.7		0.455	29203.2	2783033100	0.283	45021	159085		0.824	58585.8	2346816600	0.5	44829	89658		41786	8740.15	2263948500	3.26257e+08	0.393333	0.0626693	40028.3	4896.98		0.625667	0.107416	108300	25689.4	0.946387	0.592123
JW1604	ECK1607	b1612	fumA	1	3	2	G	4	M		0.522	37331.4	1373510700	0.383	25885	67584.9		0.375	32863.4	3627160200	0.294	65255	221956		0.68	58072.9	2378700000	0.498	47434	95249		42755.9	7766.37	2459790300	6.51835e+08	0.391667	0.0590489	46191.3	11382.1		0.525667	0.088065	128263	47522.1	1	0.525667
JW1176	ECK1175	b1187	fadR	1	1	3	G	5	M		0.858	67700.3	134644500	0.528	2253	4267.05		0.82	69620.7	232210800	0.565	3628	6421.24		1.005	93802.2	200606400	0.701	3714	5298.15		77041.1	8398.89	189153900	2.87412e+07	0.598	0.0525959	3198.33	473.318		0.894333	0.0564102	5328.81	622.051	1	0.894333
JW2271	ECK2270	b2276	nuoN	1	3	3	G	6	M		0.464	37834.8	1764684900	0.355	35354	99588.7		0.407	35930.2	2611955700	0.313	48394	154613		0.628	68165.9	1755469800	0.549	35293	64286		47310.3	10442.3	2044036800	2.83972e+08	0.405667	0.072685	39680.3	4356.87		0.499667	0.0662428	106163	26281.6	1	0.499667
JW1225	ECK1232	b1237	hns	1	1	4	G	7	M		0.475	43482.1	623772900	0.418	11092	26535.9		0.606	37172.4	1352755800	0.335	23836	71152.2		0.592	75661.5	444070800	0.607	6785	11177.9		52105.3	11918.1	806866500	2.77831e+08	0.453333	0.0804826	13904.3	5119.12		0.557667	0.0415304	36288.7	17986.7	1	0.557667
JW2279	ECK2278	b2284	nuoF	1	3	4	G	8	M		0.541	41910.8	961741800	0.387	19393	50111.1		0.466	39019.2	1522890900	0.337	28019	83142.4		0.703	75014.3	1134862200	0.585	24321	41574.4		51981.5	11546.6	1206498300	1.65902e+08	0.436333	0.0757217	23911	2498.54		0.57	0.0699357	58276	12675.1	1	0.57
JW2807	ECK2837	b2839	lysR	1	1	5	G	9	M		0.763	54117.6	328748400	0.488	6653	13633.2		0.571	47516.5	498199500	0.412	8493	20614.1		0.749	81000.1	463563000	0.633	8513	13448.7		60878.1	10239.9	430170300	5.16873e+07	0.511	0.0648254	7886.33	616.694		0.694333	0.061799	15898.6	2358.32	1	0.694333
JW0563	ECK0566	b0574	cusB	1	3	5	G	10	M		0.895	55189.3	136657800	0.522	2910	5574.71		0.448	32262.8	756215100	0.349	11919	34151.9		0.979	91548.9	148642200	0.687	2891	4208.15		59667	17260.2	347171700	2.04551e+08	0.519333	0.0975813	5906.67	3006.17		0.774	0.164794	14644.9	9761.45	1	0.774
JW1967	ECK1983	b1988	nac	1	1	6	G	11	M		0.742	53429.4	872730900	0.477	20560	43102.7		0.585	41428.7	1680145200	0.359	29694	82713.1		0.815	83348.1	1101852000	0.641	23488	36642.7		59402.1	12464.1	1218242700	2.40236e+08	0.492333	0.0817666	24580.7	2692.76		0.714	0.0678552	54152.9	14401.4	1	0.714
JW3890	ECK3911	b3919	tpiA	1	3	6	G	12	M		0.703	47584.4	1390338900	0.445	33954	76301.1		0.554	37425.1	2819499300	0.336	56225	167336		0.746	72854.8	2062150200	0.572	48459	84718.5		52621.4	10533.2	2090662800	4.12809e+08	0.451	0.0681934	46212.7	6526.46		0.667667	0.0581731	109452	29044	1	0.667667
JW4051	ECK4083	b4090	rpiB	1	3	7	G	14	M		0.516	36972.3	1898838000	0.371	37897	102148		0.439	34027.1	3324888900	0.308	59733	193938		0.788	74339.2	1546064100	0.596	36611	61427.9		48446.2	12974.4	2256597000	5.43767e+08	0.425	0.0874128	44747	7502.19		0.581	0.10586	119171	39188	1	0.581
JW4200	ECK4236	b4241	treR	1	1	8	G	15	M		0.674	48409.5	997860600	0.438	20761	47399.5		0.572	39953.7	1910058300	0.343	33420	97434.4		0.705	77539.5	1309798800	0.587	25829	44001.7		55300.9	11384.1	1405905900	2.67677e+08	0.456	0.0710094	26670	3678.45		0.650333	0.040176	62945.2	17272.5	1	0.650333
JW0389	ECK0393	b0399	phoB	1	3	8	G	16	M		0.626	47090.3	526237200	0.408	12436	30480.4		0.584	43716.6	932660100	0.358	18885	52751.4		0.697	76944.7	797691600	0.575	17791	30940.9		55917.2	10558.8	752196300	1.19509e+08	0.447	0.0656074	16370.7	1992.52		0.635667	0.0329764	38057.6	7348.12	1	0.635667
JW0596	ECK0597	b0603	ybdO	1	1	9	G	17	M		0.631	47227.5	897085800	0.417	19480	46714.6		0.557	40310.5	1703150100	0.349	31594	90527.2		0.735	76579.1	1325113200	0.594	26801	45119.5		54705.7	11117.5	1308449700	2.3284e+08	0.453333	0.0730213	25958.3	3522.3		0.641	0.0516269	60787.1	14877.2	1	0.641
JW2676	ECK2702	b2707	srlR	1	1	10	G	19	M		0.744	52838	359816400	0.441	8344	18920.6		0.624	45725.2	602217000	0.381	12893	33839.9		0.803	78844	435822300	0.588	9996	17000		59135.7	10065.8	465951900	7.15783e+07	0.47	0.0614898	10411	1329.48		0.723667	0.0526635	23253.5	5322.15	1	0.723667
JW1601	ECK1604	b1609	rstB	1	3	10	G	20	M		0.881	48056.5	143952300	0.528	2151	4073.86		0.076	14263.4	237178800	0.086	3748	43581.4		1.003	90907.9	162699300	0.672	3171	4718.75		51075.9	22176.8	181276800	2.84701e+07	0.428667	0.176304	3023.33	466.889		0.653333	0.290807	17458	13063	1	0.653333
JW0422	ECK0426	b0432	cyoA	1	1	11	G	21	M		0.819	58378.1	1250116200	0.519	26203	50487.5		0.706	50361.4	2109936600	0.427	42774	100173		0.845	69087.6	1534658400	0.578	30254	52342.6		59275.7	5424.39	1631570400	2.52894e+08	0.508	0.0439356	33077	4987.53		0.79	0.0426654	67667.8	16261.6	1	0.79
JW2181	ECK2185	b2193	narP	1	3	11	G	22	M		0.821	43566.8	859140900	0.522	15359	29423.4		0.702	37084.8	1605492000	0.394	30165	76560.9		1.068	69245.1	139548600	0.574	2921	5088.85		49965.6	9819.7	868060500	4.23205e+08	0.496667	0.0534831	16148.3	7874.56		0.863667	0.107787	37024.4	20979.3	0.946387	0.817363
JW0717	ECK0716	b0728	sucC	1	1	12	G	23	M		0.846	57094.7	622545300	0.469	13532	28852.9		0.81	53688.6	1355211900	0.434	28017	64555.3		1.022	69573.1	876807900	0.563	19883	35316.2		60118.8	4828.32	951521700	2.14776e+08	0.488667	0.0385155	20477.3	4192.01		0.892667	0.0654964	42908.1	10983.2	0.861677	0.76919
JW3624	ECK3639	b3649	rpoZ	1	5	1	G	1	N		0.941	48604.7	228089700	0.47	4651	9895.74		0.682	45368.7	410642100	0.388	7792	20082.5		1.423	67024.2	237907800	0.565	6418	11359.3		53665.9	6744.16	292213200	5.92822e+07	0.474333	0.0511414	6287	909.091		1.01533	0.217113	13779.2	3179.84	0.740584	0.75194
JW1982	ECK1993	b2000	flu	1	7	1	G	2	N		0.763	40486.9	1231880400	0.482	21481	44566.4		0.42	32855.3	1765518300	0.296	27470	92804.1		0.835	76253.8	102039300	0.656	2151	3278.96		49865.3	13376.9	1033146000	4.90378e+08	0.478	0.103942	17034	7639.69		0.672667	0.128032	46883.1	25869.6	0.861677	0.579621
JW3968	ECK3996	b4004	zraR	1	5	2	G	3	N		1.01	69547.1	193558500	0.557	2554	4585.28		0.692	60468.5	300682800	0.475	3935	8284.21		1.143	86575.6	225675000	0.627	4532	7228.07		72197	7652.06	239972100	3.17396e+07	0.553	0.0439242	3673.67	585.759		0.948333	0.133794	6699.19	1100.05	0.946387	0.89749
JW1270	ECK1273	b1278	pgpB	1	7	2	G	4	N		0.563	39974.4	1504074600	0.411	28505	69355.2		0.418	33576.1	2605025700	0.31	45655	147274		0.607	51438.4	1817849700	0.452	37425	82798.7		41663	5225.07	1975650000	3.27465e+08	0.391	0.042194	37195	4952.11		0.529333	0.0570974	99809.4	24047.6	0.946387	0.500954
JW3021	ECK3038	b3049	glgS	1	5	3	G	5	N		0.8	55511.4	720698400	0.47	15211	32363.8		0.59	46169	1166367600	0.379	21571	56915.6		0.705	63467.2	982232100	0.479	19908	41561.6		55049.2	4998.9	956432700	1.29299e+08	0.442667	0.0319392	18896.7	1904.34		0.698333	0.0607134	43613.7	7161.36	0.946387	0.660894
JW0188	ECK0192	b0192	nlpE	1	7	3	G	6	N		0.525	39208.6	1478605500	0.378	30211	79923.3		0.362	34113	2140575300	0.298	37827	126936		0.729	59088.2	1841546700	0.501	38080	76008		44136.6	7619.13	1820242500	1.91391e+08	0.392333	0.0590377	35372.7	2581.87		0.538667	0.106164	94289.2	16362.6	0.946387	0.509787
JW0912	ECK0920	b0929	ompF	1	7	4	G	8	N		0.675	49226.9	926182800	0.441	20388	46231.3		0.655	43349.8	1513185300	0.373	27243	73037.5		0.808	71921.3	1191699900	0.556	22926	41233.8		54832.7	8711.12	1210356000	1.6971e+08	0.456667	0.0534052	23519	2000.96		0.712667	0.048015	53500.9	9874.28	0.946387	0.674458
JW0723	ECK0722	b0734	cydB	1	5	5	G	9	N		0.547	39213.4	1723274100	0.377	35077	93042.4		0.593	42017.4	1752228000	0.389	30838	79275.1		0.761	67211.3	2065302000	0.562	42976	76469.8		49480.7	8902.18	1846934700	1.09503e+08	0.442667	0.0597671	36297	3556.64		0.633667	0.0650367	82929.1	5121.11	0.946387	0.599694
JW5780	ECK4308	b4317	fimD	1	7	5	G	10	N		0.796	53792.3	250867800	0.467	4891	10473.2		0.664	48744.1	367094700	0.399	5174	12967.4		0.856	71700.3	414095400	0.567	7245	12777.8		58078.9	6964.87	344019300	4.85117e+07	0.477667	0.0487898	5770	742.011		0.772	0.0567098	12072.8	801.66	0.946387	0.730611
JW0146	ECK0149	b0150	fhuA	1	5	6	G	11	N		0.714	52997.9	826360200	0.477	19052	39941.3		0.679	45720.9	1501055100	0.385	27418	71215.6		0.718	63831.6	1146087000	0.519	24264	46751.4		54183.5	5261.61	1157834100	1.94856e+08	0.460333	0.0395699	23578	2439.29		0.703667	0.0123873	52636.1	9495.48	0.946387	0.665941
JW3354	ECK3378	b3391	hofQ	1	5	7	G	13	N		0.961	62494	314864100	0.539	6959	12910.9		0.599	46159.4	574677000	0.384	9816	25562.5		1.056	76073.9	582153300	0.598	12664	21177.3		61575.8	8647.76	490564800	8.78769e+07	0.507	0.0638148	9813	1646.89		0.872	0.139228	19883.6	3709.03	0.946387	0.825249
JW0117	ECK0120	b0121	speE	1	5	8	G	15	N		0.53	42596.1	304026300	0.37	6721	18164.9		0.465	39815.8	539110800	0.33	10153	30766.7		0.669	58320.7	514636200	0.473	11399	24099.4		46910.9	5761.1	452591100	7.46176e+07	0.391	0.042595	9424.33	1398.71		0.554667	0.0601674	24343.6	3639.88	0.946387	0.524929
JW3689	ECK3704	b3711	yidZ	1	7	8	G	16	N		0.716	52522.2	944997300	0.459	19315	42080.6		0.7	50096.7	1741590900	0.423	32966	77933.8		0.925	77979.1	1174102200	0.608	24447	40208.9		60199.3	8917.43	1286896800	2.36772e+08	0.496667	0.0566284	25576	3980.93		0.780333	0.0724806	53407.8	12274.9	0.946387	0.738497
JW0112	ECK0115	b0116	lpd	1	5	9	G	17	N		0.667	47678.3	1120567500	0.427	23269	54494.1		0.594	40805.5	2159095500	0.354	39522	111644		0.856	66684.6	1759388400	0.543	35437	65261.5		51722.8	7739.53	1679683800	3.02434e+08	0.441333	0.0550283	32742.7	4881.41		0.705667	0.0780648	77133.2	17533.1	0.946387	0.667834
JW2560	ECK2574	b2576	srmB	1	7	9	G	18	N		1.097	74373.8	168139800	0.57	3775	6622.81		0.694	58567.1	290798100	0.459	5641	12289.8		1.047	87143.3	256554000	0.667	5665	8493.25		73361.4	8264.75	238497300	3.65413e+07	0.565333	0.0600897	5027	626.038		0.946	0.126824	9135.27	1667.11	0.946387	0.895282
JW2373	ECK2372	b2376	ypdI	1	5	10	G	19	N		0.936	64904.6	251054100	0.546	5459	9998.17		0.771	62595.4	387882900	0.489	7311	14950.9		0.967	88157.2	305808300	0.662	6380	9637.46		71885.7	8162.99	314915100	3.97607e+07	0.565667	0.0508997	6383.33	534.629		0.891333	0.0608285	11528.9	1714.2	0.946387	0.843546
JW0428	ECK0432	b0438	clpX	1	7	10	G	20	N		0.593	49511.6	1120638600	0.407	19929	48965.6		0.608	49014.7	1869162300	0.398	31816	79939.7		0.518	56962	1707183000	0.438	30157	68851.6		51829.4	2570.28	1565661300	2.27371e+08	0.414333	0.0121152	27300.7	3716.82		0.573	0.0278388	65919	9060.89	0.946387	0.54228
JW0915	ECK0923	b0932	pepN	1	7	11	G	22	N		0.845	74596.9	574915500	0.671	11070	16497.8		0.982	72234.1	1178010900	0.67	21813	32556.7		0.962	86681.5	861316200	0.735	17008	23140.1		77837.5	4474.31	871414200	1.74172e+08	0.692	0.0215019	16630.3	3106.98		0.929667	0.0427252	24064.9	4658.82	0.946387	0.879824
JW0449	ECK0454	b0460	hha	1	5	12	G	23	N		0.67	41023.8	2067426000	0.468	35591	76049.1		0.61	38639	6513986700	0.374	121430	324679		1.116	74628.8	105162300	0.595	2139	3594.96		51430.5	11619.6	2895525000	1.89583e+09	0.479	0.0640338	53053.3	35526		0.798667	0.159609	134774	97228.7	0.861677	0.688193
JW0305	ECK0311	b0313	betI	1	1	1	H	1	O		0.743	51619.8	944170200	0.47	20497	43610.6		0.612	44582.9	1739612700	0.383	34378	89759.8		1.35	70987.2	1041456600	0.653	25172	38548.2		55730	7894.45	1241746500	2.50512e+08	0.502	0.0795676	26682.3	4077.64		0.901667	0.227334	57306.2	16292.5	0.740584	0.66776
JW1122	ECK1122	b1136	icd	1	3	1	H	2	O		0.753	48474.3	855781200	0.431	19385	44976.8		0.745	48888.9	1107888300	0.445	23348	52467.4		0.88	63538.9	1096422300	0.543	25655	47246.8		53634	4953.89	1020030600	8.21914e+07	0.473	0.0352326	22796	1830.92		0.792667	0.0437277	48230.3	2217.57	0.861677	0.683023
JW5894	ECK0335	b0338	cynR	1	1	2	H	3	O		0.653	49171.1	928666800	0.445	18836	42328.1		0.482	39101.4	1738485900	0.318	28678	90182.4		0.829	62262.6	1233346500	0.523	26678	51009.6		50178.4	6705.01	1300166400	2.3615e+08	0.428667	0.0597392	24730.7	3003.35		0.654667	0.100174	61173.3	14719.4	0.861677	0.564111
JW1666	ECK1672	b1676	pykF	1	3	2	H	4	O		0.623	47445.1	1516701600	0.47	28805	61287.2		0.379	16963.7	425844000	0.189	10220	54074.1		1.04	76484.7	134883900	0.622	2683	4313.5		46964.5	17183.9	692476500	4.20585e+08	0.427	0.126832	13902.7	7762.33		0.680667	0.19298	39891.6	17910.5	0.861677	0.586515
JW3229	ECK3248	b3261	fis	1	1	3	H	5	O		0.867	57243.4	204403500	0.5	4239	8478		0.731	53923	283289400	0.447	5475	12248.3		0.903	68099.1	301082400	0.554	7062	12747.3		59755.2	4280.68	262925100	2.97082e+07	0.500333	0.0308887	5592	817.027		0.833667	0.0523747	11157.9	1347.66	0.861677	0.718351
JW2272	ECK2271	b2277	nuoM	1	3	3	H	6	O		0.532	41543.7	1034666100	0.387	21372	55224.8		0.477	39769.2	1905276600	0.347	34319	98902		0.648	55175.1	1372170600	0.48	27641	57585.4		45496	4866.59	1437371100	2.53429e+08	0.404667	0.0393968	27777.3	3738.1		0.552333	0.0503995	70570.7	14182	0.861677	0.475933
JW3964	ECK3992	b4000	hupA	1	1	4	H	7	O		0.703	54010.3	477624600	0.462	10206	22090.9		0.584	44634.1	886092300	0.369	15949	43222.2		0.808	63243.4	774050400	0.516	15831	30680.2		53962.6	5372.12	712589100	1.21853e+08	0.449	0.0429302	13995.3	1894.97		0.698333	0.0647053	31997.8	6135.55	0.861677	0.601738
JW2280	ECK2279	b2285	nuoE	1	3	4	H	8	O		0.551	44065.9	860909400	0.392	17983	45875		0.543	45325.7	1722745800	0.39	30511	78233.3		0.828	63554.6	1835561700	0.561	39669	70711.2		50982.1	6296.77	1473072300	3.07809e+08	0.447667	0.0566696	29387.7	6285.35		0.640667	0.0936951	64939.9	9776.62	0.861677	0.552048
JW1612	ECK1615	b1620	malI	1	1	5	H	9	O		0.464	38441.8	2908845900	0.362	59407	164108		0.232	31288	7664379300	0.26	123907	476565		0.405	41626.6	4933222200	0.348	113080	324943		37118.8	3056.92	5168815800	1.37785e+09	0.323333	0.0319235	98798	19942		0.367	0.0696156	321872	90211.8	0.861677	0.316235
JW2943	ECK2970	b2976	glcB	1	3	5	H	10	O		0.62	44927.5	3192579900	0.424	75999	179243		0.683	37650.9	3041067600	0.392	54350	138648		0.477	42647.5	7126577100	0.366	147499	403003		41741.9	2148.81	4453408200	1.3373e+09	0.394	0.016773	92616	28144.1		0.593333	0.0609435	240298	82192.1	0.861677	0.511262
JW3918	ECK3938	b3946	fsaB	1	3	6	H	12	O		0.737	53397.5	1027872900	0.476	23571	49518.9		0.663	47192.3	1944112500	0.4	34678	86695		0.787	60238.3	1666833300	0.5	33368	66736		53609.4	3767.53	1546272900	2.71278e+08	0.458667	0.0301404	30539	3504.46		0.729	0.0360185	67650	10741.5	0.861677	0.628163
JW1650	ECK1654	b1658	purR	1	1	7	H	13	O		1.127	70439.8	248004000	0.595	5269	8855.46		0.839	62977.8	401234400	0.51	6527	12798		1.012	73040.1	653439600	0.596	13485	22625.8		68819.2	3015.65	434226000	1.18196e+08	0.567	0.0285015	8427	2554.94		0.992667	0.0836985	14759.8	4094.39	0.861677	0.855358
JW4083	ECK4115	b4122	fumB	1	3	7	H	14	O		0.759	56183.7	1041260400	0.501	23943	47790.4		0.607	42893.4	2020642200	0.365	37415	102507		0.804	64202.3	1524725100	0.547	32249	58956.1		54426.5	6213.79	1528875900	2.82731e+08	0.471	0.0546382	31202.3	3924.09		0.723333	0.0595996	69751.1	16692	0.861677	0.62328
JW4356	ECK4385	b4393	trpR	1	1	8	H	15	O		1.036	66746.9	180612000	0.554	3311	5976.53		0.675	50233.1	300737700	0.417	4652	11155.9		1.119	79141.4	345321900	0.591	7115	12038.9		65373.8	8373.29	275557200	4.91863e+07	0.520667	0.0529224	5026	1113.93		0.943333	0.136289	9723.78	1890.88	0.861677	0.812849
JW0390	ECK0394	b0400	phoR	1	3	8	H	16	O		0.507	36891.9	2081441700	0.36	39442	109561		0.441	33327.7	3081108600	0.3	54973	183243		0.545	45670.3	2308622400	0.4	46622	116555		38630	3667.45	2490390900	3.02552e+08	0.353333	0.0290593	47012.3	4487.66		0.497667	0.0303827	136453	23482	0.861677	0.428828
JW0624	ECK0622	b0629	ybeF	1	1	9	H	17	O		0.644	48285.4	1095246900	0.433	22131	51110.9		0.552	42642.5	1869295500	0.363	32661	89975.2		0.735	60829.7	1549308600	0.503	28401	56463.2		50585.9	5374.71	1504617000	2.24563e+08	0.433	0.0404145	27731	3058.15		0.643667	0.0528278	65849.8	12161.3	0.861677	0.554633
JW0980	ECK0986	b0995	torR	1	3	9	H	18	O		1.179	67848.3	725811300	0.614	17841	29057		1.05	62281.2	1383627600	0.553	27777	50229.7		1.01	74725.8	1306437300	0.61	26360	43213.1		68285.1	3599.1	1138625400	2.07606e+08	0.592333	0.0197005	23992.7	3102.91		1.07967	0.0509913	40833.3	6226.77	0.861677	0.930324
JW0007	ECK0008	b0008	talB	1	1	10	H	19	O		0.769	53762.7	484930800	0.463	11279	24360.7		0.717	50081.8	882568800	0.428	20035	46810.7		0.775	59657.9	783568800	0.492	18388	37374		54500.8	2788.91	717022800	1.19513e+08	0.461	0.0185023	16567.3	2686.57		0.753667	0.018415	36181.8	6508.13	0.861677	0.649417
JW1871	ECK1883	b1882	cheY	1	3	10	H	20	O		0.682	46294.4	2070434700	0.435	42339	97331		0.737	46197.3	3515475600	0.402	77513	192818		0.774	60195.7	2520294300	0.5	56051	112102		50895.8	4650.04	2702068200	4.26934e+08	0.445667	0.0287885	58634.3	10235.7		0.731	0.026727	134084	29675.2	0.861677	0.629886
JW0506	ECK0511	b0518	fdrA	1	1	11	H	21	O		0.734	50654.3	1433815200	0.449	32605	72616.9		0.591	42045.2	2690812800	0.358	57554	160765		0.805	60066.9	1665758700	0.498	36607	73508		50922.1	5204.14	1930128900	3.86191e+08	0.435	0.0410163	42255.3	7736.08		0.71	0.0629312	102297	29235.4	0.861677	0.611791
JW2205	ECK2210	b2217	rcsB	1	3	11	H	22	O		0.798	52083.1	1044393300	0.462	25703	55634.2		0.739	45860.7	2001352500	0.398	48093	120837		0.902	60924.8	1490953500	0.517	38251	73986.5		52956.2	4370.49	1512233100	2.76455e+08	0.459	0.0343851	37349	6479.15		0.813	0.047648	83485.8	19412.4	0.861677	0.700543
JW0739	ECK0745	b0756	galM	1	1	12	H	23	O		0.774	52666.1	961089300	0.468	19597	41873.9		0.617	43184.4	2039917500	0.369	43581	118106		0.954	65353.1	1233980100	0.558	26965	48324.4		53734.6	6421.81	1411662300	3.23855e+08	0.465	0.0545802	30047.7	7093.08		0.781667	0.097359	69434.7	24406.6	0.861677	0.673544
JW3643	ECK3659	b3668	uhpB	1	5	1	H	1	P		0.902	50001.9	1439766900	0.449	32415	72193.8		0.668	43198.3	2130543900	0.386	46770	121166		1.32	64777.8	1350781200	0.609	34008	55842.4		52659.3	6369.58	1640364000	2.46432e+08	0.481333	0.0663735	37731	4542.84		0.963333	0.190698	83067.3	19625.4	0.740584	0.713429
JW1502	ECK1502	b1509	ydeU	1	7	1	H	2	P		0.89	55571.9	1060552800	0.481	24753	51461.5		0.626	44188	2006882100	0.361	40095	111066		1.002	64415.4	1212822000	0.559	28236	50511.6		54725.1	5854.48	1426752300	2.93377e+08	0.467	0.0575847	31028	4643.66		0.839333	0.111459	71013.2	20028.5	0.740584	0.621597
JW4073	ECK4105	b4112	basS	1	5	2	H	3	P		0.95	57604.1	165978000	0.498	3048	6120.48		0.819	58290.2	211046400	0.47	3162	6727.66		1.017	65945.2	223638300	0.55	4863	8841.82		60613.2	2673.34	200220900	1.75031e+07	0.506	0.0234379	3691	586.923		0.928667	0.0581445	7229.99	824.756	0.740584	0.687756
JW0554	ECK0557	b0565	ompT	1	7	2	H	4	P		0.871	22697.9	960327900	0.457	26818	58682.7		0.663	26174.1	1665112500	0.386	39843	103220		1.081	61124.4	126552600	0.518	2896	5590.73		36665.5	12270.6	917331000	4.44664e+08	0.453667	0.0381415	23185.7	10819.2		0.871667	0.120667	55831.2	28219.2	0.740584	0.645542
JW2341	ECK2338	b2344	fadL	1	7	3	H	6	P		0.727	52317.4	1055863800	0.47	24664	52476.6		0.64	46812.8	1736903700	0.398	34163	85836.7		0.796	63484.1	1245969000	0.531	25347	47734.5		54204.8	4904.24	1346245500	2.02892e+08	0.466333	0.0384375	28058	3058.86		0.721	0.0451331	62015.9	11988.8	0.740584	0.533961
JW2294	ECK2291	b2297	pta	1	5	4	H	7	P		0.856	56996.1	1292918400	0.547	28786	52625.2		0.511	38110.5	2358986400	0.34	44401	130591		0.746	53976.1	1287289800	0.482	27615	57292.5		49694.2	5857.11	1646398200	3.56298e+08	0.456333	0.0611183	33600.7	5410.74		0.704333	0.101749	80169.6	25246.7	0.740584	0.521618
JW1371	ECK1372	b1377	ompN	1	7	4	H	8	P		0.688	50862.9	1297092600	0.453	28550	63024.3		0.608	44008.9	2229914700	0.368	43465	118111		0.825	61190.5	1611784800	0.523	33752	64535.4		52020.8	4993.56	1712930700	2.7399e+08	0.448	0.0448144	35255.7	4370.74		0.707	0.0633588	81890.4	18115.8	0.740584	0.523593
JW4276	ECK4304	b4313	fimE	1	7	5	H	10	P		0.733	52251	5936604300	0.51	134186	263110		0.514	40884.9	1646919900	0.362	30619	84582.9		0.645	49729.4	1638914400	0.453	35730	78874.2		47621.8	3446.19	3074146200	1.43123e+09	0.441667	0.0430981	66845	33702.8		0.630667	0.0636248	142189	60482.9	0.740584	0.467062
JW3703	ECK3718	b3725	pstB	1	5	6	H	11	P		0.878	44514.3	1481680800	0.462	39429	85344.2		0.735	39177.4	6590718000	0.408	136094	333564		0.747	48212.3	3236739300	0.435	74679	171676		43968	2622.39	3769712700	1.49873e+09	0.435	0.0155885	83400.7	28243.5		0.786667	0.0457979	196861	72752.9	0.740584	0.582593
JW2818	ECK2848	b2850	ygeF	1	7	6	H	12	P		0.851	59532	1332787500	0.481	31041	64534.3		0.686	50158.1	2210823000	0.391	39260	100409		0.973	67177.4	2183837400	0.553	44509	80486.4		58955.8	4921.51	1909149300	2.88286e+08	0.475	0.0468615	38270	3919.26		0.836667	0.0831592	81810	10377.3	0.740584	0.619622
JW3454	ECK3472	b3487	yhiI	1	5	7	H	13	P		1.599	80816.7	101178900	0.634	1940	3059.94		1.111	64279.7	199730700	0.527	2689	5102.47		1.64	99346.7	182408400	0.77	3694	4797.4		81481	10128.4	161106000	3.03779e+07	0.643667	0.0703144	2774.33	508.131		1.45	0.169913	4319.94	636.125	0.740584	1.07385
JW3896	ECK3917	b3925	glpX	1	7	7	H	14	P		0.846	42616.7	815651100	0.448	18391	41051.3		0.754	36531.5	3803948100	0.369	68577	185846		0.864	54946.3	2164145400	0.505	52696	104349		44698.2	5416.79	2261248200	8.64012e+08	0.440667	0.0394307	46554.7	14809.3		0.821333	0.0340653	110415	41908.4	0.740584	0.608266
JW0530	ECK0533	b0542	renD	1	5	8	H	15	P		1.162	63856.6	268400700	0.551	5996	10882		0.872	59418.4	424181700	0.484	6537	13506.2		1.133	75890.3	399098700	0.606	8556	14118.8		66388.4	4920.67	363893700	4.82924e+07	0.547	0.0352751	7029.67	778.982		1.05567	0.0922141	12835.7	992.703	0.740584	0.78181
JW4290	ECK4318	b4327	yjiE	1	7	8	H	16	P		1.085	63582.2	119429100	0.529	2339	4421.55		0.647	44987.5	1415811600	0.446	26544	59515.7		1.149	69101.8	165519000	0.565	3601	6373.45		59223.8	7294.33	566919900	4.24654e+08	0.513333	0.0352341	10828	7866.44		0.960333	0.157752	23436.9	18048.2	0.740584	0.711208
JW4191	ECK4227	b4232	fbp	1	5	9	H	17	P		0.86	55001.2	1064034000	0.483	26186	54215.3		0.772	56851.7	1253280600	0.462	25487	55166.7		0.903	67061	1203559200	0.537	26957	50199.3		59638	3749.76	1173624600	5.6644e+07	0.494	0.0223383	26210	424.522		0.845	0.038553	53193.7	1522.22	0.740584	0.625793
JW1797	ECK1806	b1808	yoaA	1	7	9	H	18	P		0.665	42102.5	1096735500	0.405	23443	57884		0.596	44131.1	6134206500	0.425	103352	243181		0.689	61268.6	3989304000	0.548	67936	123971		49167.4	6078.85	3740082000	1.45952e+09	0.459333	0.0447077	64910.3	23117.3		0.65	0.0278747	141679	54218.5	0.740584	0.48138
JW2421	ECK2423	b2428	yfeU	1	5	10	H	19	P		1.061	59780.5	329784300	0.521	7725	14827.3		1.051	63413.9	482655600	0.499	8730	17495		1.031	69667	463152600	0.571	9839	17231.2		64287.2	2887.19	425197500	4.80377e+07	0.530333	0.0213021	8764.67	610.505		1.04767	0.00881917	16517.8	848.699	0.740584	0.775885
JW0429	ECK0433	b0439	lon	1	7	10	H	20	P		1.195	86890	1042074900	0.793	23563	29713.7		1.094	85066.2	1831257000	0.752	34964	46494.7		0.987	93571.5	1291319100	0.806	26756	33196		88509.2	2585.3	1388217000	2.32912e+08	0.783667	0.016272	28427.7	3395.66		1.092	0.0600528	36468.2	5113.06	0.740584	0.808718
JW2621	ECK2636	b2640	yfjV	1	5	11	H	21	P		1.08	57217.5	427870800	0.594	8959	15082.5		0.735	36310.8	2970856800	0.575	63006	109576		1.214	78108.6	117994500	0.607	2400	3953.87		57212.3	12066	1172240700	9.03746e+08	0.592	0.00929157	24788.3	19202.4		1.00967	0.142677	42870.7	33506.9	0.740584	0.747743
JW0957	ECK0966	b0975	hyaD	1	7	11	H	22	P		0.972	51480.8	880878600	0.498	22158	44494		0.84	47973.5	1939289400	0.434	42852	98737.3		1.109	64394.9	1287154800	0.577	29794	51636		54616.4	4992.98	1369107600	3.08272e+08	0.503	0.0413562	31601.3	6041.81		0.973667	0.0776581	64955.8	17016.1	0.740584	0.721082
JW1058	ECK1056	b1071	flgM	1	5	12	H	23	P		1.089	62399.8	987692400	0.542	28256	52132.8		0.889	57254.2	1515051900	0.486	36073	74224.3		1.273	75145.9	1064091600	0.637	26375	41405		64933.3	5317.95	1188945300	1.64538e+08	0.555	0.0440719	30234.7	2969.24		1.08367	0.110883	55920.7	9661.55	0.740584	0.802546
JW1431	ECK1429	b1435	ydcP	1	7	12	H	24	P		1.192	65005.1	1255970700	0.551	35398	64243.2		0.971	57308.8	1910721600	0.467	53782	115165		1.225	73368	1128481200	0.607	31210	51416.8		65227.3	4637.21	1431724500	2.4231e+08	0.541667	0.0406831	40130	6932.24		1.12933	0.0797378	76941.6	19467	0.740584	0.836366
JW1489	ECK1488	b1494	pqqL	2	9	1	A	1	A		0.668	46365.6	2931137100	0.368	60420	164185		0.969	59835.4	2571289200	0.476	61440	129076		0.876	61470	1843188300	0.487	44311	90987.7		55890.3	4785.7	2448538200	3.20005e+08	0.443667	0.0379664	55390.3	5547.49		0.837667	0.08898	128083	21136	0.740584	0.620363
JW2445	ECK2456	b2461	eutP	2	11	1	A	2	A		0.531	37759.5	2134137600	0.325	42768	131594		1.002	57586.9	2184870600	0.515	52526	101992		0.935	63308	1616765400	0.537	37332	69519.6		52884.8	7740.87	1978591200	1.81505e+08	0.459	0.0673003	44208.7	4444.89		0.822667	0.14711	101035	17925.7	0.740584	0.609254
JW2712	ECK2737	b2742	nlpD	2	9	3	A	5	A		0.721	55060.1	452164500	0.419	9520	22720.8		1.108	67517.3	451092600	0.538	11963	22236.1		0.957	71863	435455100	0.54	11704	21674.1		64813.5	5035.45	446237400	5.40002e+06	0.499	0.0400042	11062.3	774.783		0.928667	0.112612	22210.3	302.428	0.740584	0.687756
JW2608	ECK2623	b2627	yfjK	2	11	3	A	6	A		0.572	36447.9	3135924900	0.333	59788	179544		0.831	49051.9	3255535800	0.458	75814	165533		0.822	55126.3	2429816400	0.484	53081	109671		46875.4	5500.7	2940425700	2.57629e+08	0.425	0.0466083	62894.3	6743.75		0.741667	0.0848731	151583	21342.3	0.740584	0.549266
JW3100	ECK3119	b3131	agaR	2	9	4	A	7	A		0.529	37833.1	2845880100	0.334	51112	153030		0.878	55820.2	2891151000	0.511	67040	131194		0.949	61449.4	2153688300	0.531	47917	90239.2		51700.9	7121.77	2630239800	2.38634e+08	0.458667	0.0626001	55356.3	5914.19		0.785333	0.129795	124821	18404.1	0.740584	0.581605
JW2624	ECK2639	b2643	yfjX	2	11	4	A	8	A		0.683	49121.1	1709523900	0.415	33653	81091.6		1.125	71335.9	1917090000	0.581	45708	78671.3		0.884	62954.2	1863702900	0.528	41527	78649.6		61137.1	6476.9	1830105600	6.22294e+07	0.508	0.0489524	40296	3533.99		0.897333	0.127768	79470.8	810.4	0.740584	0.664551
JW3903	ECK3924	b3932	hslV	2	9	5	A	9	A		0.58	40438.4	2225407500	0.357	42810	119916		0.888	51282.2	2123082900	0.483	48767	100967		0.933	59922.8	1559268000	0.523	35430	67743.8		50547.8	5636.63	1969252800	2.0711e+08	0.454333	0.0500178	42335.7	3857.36		0.800333	0.11093	96208.9	15247.5	0.740584	0.592714
JW2702	ECK2727	b2732	ygbA	2	11	5	A	10	A		0.805	56817.1	492360300	0.472	9052	19178		1.561	90617.2	483129900	0.669	11664	17435		1.177	77114.6	455056200	0.592	11326	19131.8		74849.6	9822.76	476848800	1.12174e+07	0.577667	0.0573188	10680.7	820.158		1.181	0.218248	18581.6	573.45	0.740584	0.87463
JW3495	ECK3512	b3527	yhjJ	2	9	6	A	11	A		0.705	47927.7	2881404000	0.421	61961	147176		1.002	64451.5	2453140800	0.565	61929	109609		0.932	64392.7	2059484400	0.55	52384	95243.6		58924	5498.16	2464676400	2.37338e+08	0.512	0.0457056	58758	3187.01		0.879667	0.0896406	117343	15482.2	0.740584	0.651467
JW1560	ECK1562	b1568	ydfX	2	11	6	A	12	A		0.864	58163.2	2843255700	0.499	68630	137535		0.88	55633.9	3039102900	0.488	79198	162291		0.783	56827.2	2447028900	0.505	63345	125436		56874.8	730.551	2776462500	1.74149e+08	0.497333	0.00497773	70391	4660.3		0.842333	0.0300241	141754	10846.3	0.740584	0.623819
JW4132	ECK4170	b4174	hflK	2	9	7	A	13	A		1.142	60370.7	2360146500	0.54	60075	111250		1.231	69928.4	2377735200	0.618	64799	104853		1.184	79168.7	2165546700	0.669	55767	83358.7		69822.6	5426.76	2301142800	6.79879e+07	0.609	0.03751	60213.7	2608.24		1.18567	0.0257056	99820.5	8435.5	0.740584	0.878086
JW1599	ECK1602	b1607	ydgC	2	11	7	A	14	A		0.897	53821.6	1741595400	0.482	37895	78620.3		1.373	71573.9	1726772400	0.645	44547	69065.1		1.181	73911.5	1663141500	0.646	40445	62608.4		66435.7	6343.03	1710503100	2.40643e+07	0.591	0.0545008	40962.3	1937.61		1.15033	0.138262	70097.9	4651.02	0.740584	0.851918
JW2169	ECK2175	b2181	yejG	2	9	8	A	15	A		0.583	35817.5	3354046200	0.35	77061	220174		0.882	47276.2	2957717700	0.442	77919	176287		0.799	57503.7	2510403300	0.492	60253	122465		46865.8	6263.63	2940722400	2.43687e+08	0.428	0.0415853	71744.3	5751		0.754667	0.0891148	172976	28254.7	0.740584	0.558894
JW1659	ECK1665	b1669	ydhT	2	11	8	A	16	A		1.032	54572	695209500	0.492	13618	27678.9		1.324	62615.6	857748600	0.548	18264	33328.5		1.111	58806.4	1338297300	0.519	33082	63741.8		58664.7	2323.06	963751800	1.93061e+08	0.519667	0.0161692	21654.7	5868.97		1.15567	0.0872016	41583	11198.8	0.740584	0.855868
JW2238	ECK2236	b2244	yfaD	2	9	9	A	17	A		0.742	43086.2	2792454300	0.415	66524	160299		0.983	53484.3	2738645100	0.52	75591	145367		0.873	59950.3	2103226200	0.528	50208	95090.9		52173.6	4912.19	2544775200	2.2132e+08	0.487667	0.0364067	64107.7	7426.38		0.866	0.0696587	133586	19724.1	0.740584	0.641346
JW2270	ECK2269	b2275	yfbP	2	9	10	A	19	A		0.933	48778.4	2423430000	0.444	52573	118408		1.556	70323.8	2158103700	0.626	56685	90551.1		0.934	60445.6	2577707100	0.523	56632	108283		59849.3	6226.78	2386413600	1.22535e+08	0.531	0.0526909	55296.7	1361.92		1.141	0.2075	105747	8140.83	0.740584	0.845006
JW1800	ECK1809	b1811	yoaH	2	11	10	A	20	A		0.743	38118.1	2662524900	0.41	58242	142054		1.487	73384.6	115700400	0.644	2648	4111.8		0.848	59548.7	618804900	0.549	12656	23052.8		57017.1	10259	1132343400	7.78753e+08	0.534333	0.0679469	24515.3	17109		1.026	0.232484	56406.1	43171.4	0.740584	0.759839
JW2352	ECK2350	b2356	yfdM	2	9	11	A	21	A		0.814	41852.2	573013800	0.406	10996	27083.7		1.218	51052.8	929568600	0.522	19238	36854.4		0.814	49794.1	1209304800	0.466	21283	45671.7		47566.4	2880.08	903962400	1.84127e+08	0.464667	0.033493	17172.3	3144.09		0.948667	0.134667	36536.6	5368.23	0.740584	0.702567
JW1835	ECK1847	b1846	yebE	2	11	11	A	22	A		0.906	45417.3	1093550400	0.426	25728	60394.4		1.416	64083.1	1327153500	0.571	38637	67665.5		0.847	56349.4	1231457400	0.492	29486	59930.9		55283.2	5414.63	1217387100	6.78014e+07	0.496333	0.0419139	31283.7	3833.37		1.05633	0.180638	62663.6	2504.53	0.740584	0.782304
JW2394	ECK2393	b2399	yfeD	2	9	12	A	23	A		1.082	62861.5	743638500	0.529	17779	33608.7		1.801	78356	925346700	0.704	27956	39710.2		1.189	73424.4	676968300	0.618	17061	27606.8		71547.3	4570.29	781984500	7.42199e+07	0.617	0.0505206	20932	3518.11		1.35733	0.223973	33641.9	3494	0.740584	1.00522
JW1894	ECK1905	b1906	yecH	2	11	12	A	24	A		1.223	59616	2339926200	0.539	62664	116260		1.316	59220	2186082000	0.555	67099	120899		1.118	67069.3	1996415100	0.615	57424	93372.4		61968.4	2552.98	2174141100	9.93427e+07	0.569667	0.0231325	62395.7	2796.15		1.219	0.0571927	110177	8508.42	0.740584	0.902772
JW1990	ECK2002	b2008	yeeA	2	13	1	A	1	B		0.614	35970.2	2866717800	0.351	49366	140644		1.014	48600	3910379400	0.521	82982	159274		0.99	61400.4	2175333300	0.549	49370	89927.1		48656.9	7341.13	2984143500	5.04294e+08	0.473667	0.0618636	60572.7	11204.7		0.872667	0.129519	129948	20720.8	0.740584	0.646283
JW1456	ECK1455	b1461	ydcE	2	15	1	A	2	B		0.492	32456.5	2908472400	0.289	51080	176747		0.753	45260.9	1738582200	0.418	37364	89387.6		0.801	48957.2	1965829500	0.422	46614	110460		42224.9	4999.38	2204294700	3.58148e+08	0.376333	0.0436819	45019.3	4038.95		0.682	0.0960052	125532	26320.5	0.861677	0.587664
JW2099	ECK2105	b2112	yehE	2	13	2	A	3	B		0.593	38278.4	2253961800	0.347	40691	117265		1.026	57518	2284607700	0.509	47610	93536.3		0.935	63978.3	2120837400	0.53	46291	87341.5		53258.2	7718.59	2219802300	5.02671e+07	0.462	0.0578187	44864	2120.96		0.851333	0.131811	99381	9119.13	0.861677	0.733574
JW2112	ECK2116	b2124	yehS	2	13	3	A	5	B		0.533	39870.3	2697249600	0.362	49551	136881		0.779	49038.7	2000908800	0.419	44423	106021		0.868	53509.5	1544210100	0.467	37704	80736.6		47472.8	4014.39	2080789500	3.35242e+08	0.416	0.030348	43892.7	3430.2		0.726667	0.100184	107880	16234.2	0.861677	0.626152
JW0282	ECK0287	b0288	ykgJ	2	15	3	A	6	B		0.537	44839.5	2156858100	0.372	39108	105129		0.734	51712.2	2160361800	0.424	42145	99398.6		0.871	65357.7	1754615700	0.529	36425	68856.3		53969.8	6029.7	2023945200	1.34669e+08	0.441667	0.0461748	39226	1652.28		0.714	0.0969347	91128	11258	0.861677	0.615237
JW0986	ECK0992	b1001	yccE	2	13	4	A	7	B		0.412	37554.9	1863874800	0.338	32163	95156.8		0.514	39828	2441152800	0.355	44030	124028		0.632	51064.2	1608116400	0.433	32169	74293.3		42815.7	4176.12	1971048000	2.46375e+08	0.375333	0.029248	36120.7	3954.67		0.519333	0.0635645	97826.1	14419.1	0.861677	0.447498
JW0349	ECK0355	b0358	yaiO	2	15	4	A	8	B		0.536	39643.2	2227348800	0.35	40088	114537		0.726	45379.5	2425825800	0.398	47978	120548		0.812	61325.8	1719806400	0.511	35345	69168.3		48782.8	6486.42	2124327000	2.10219e+08	0.419667	0.0477226	41137	3684.36		0.691333	0.081538	101418	16217.8	0.861677	0.595706
JW0382	ECK0386	b0391	yaiE	2	15	5	A	10	B		0.462	34090	3270357000	0.308	60154	195305		0.67	43694.1	3699212400	0.369	77739	210675		0.729	54694.3	2857552200	0.451	63870	141619		44159.5	5952.48	3275707200	2.42981e+08	0.376	0.0414287	67254.3	5350.96		0.620333	0.080978	182533	20932.7	0.861677	0.534527
JW1101	ECK1101	b1115	ycfT	2	13	6	A	11	B		0.383	35473.9	2631729600	0.293	49599	169280		0.562	42699.7	2529957600	0.351	54137	154236		0.743	59585.1	1632376800	0.497	34869	70159		45919.6	7144.07	2264688000	3.17518e+08	0.380333	0.0606886	46201.7	5815.79		0.562667	0.103924	131225	30840.3	0.861677	0.484837
JW1250	ECK1252	b1258	yciF	2	13	8	A	15	B		0.532	38514.2	2124943200	0.343	40495	118061		1.245	66659	2031192900	0.568	45858	80735.9		0.946	66334.9	2283016500	0.556	51163	92019.8		57169.4	9328.05	2146384200	7.34814e+07	0.489	0.0730821	45838.7	3079.6		0.907667	0.206716	96939	11052.1	0.861677	0.782115
JW0638	ECK0636	b0643	ybeL	2	15	8	A	16	B		0.602	43518.2	2002680900	0.377	39376	104446		0.928	55384.8	1744454700	0.478	41142	86071.1		0.719	58502	1513373400	0.486	32563	67002.1		52468.4	4564.63	1753503000	1.41323e+08	0.447	0.0350761	37693.7	2615.5		0.749667	0.0953491	85839.6	10809.6	0.861677	0.645971
JW5804	ECK1324	b1327	ycjY	2	13	9	A	17	B		0.562	38827.2	2388675600	0.349	47911	137281		0.879	48323.2	2430018000	0.431	59346	137694		0.78	56107.3	1954072800	0.477	44517	93327		47752.6	4996.51	2257588800	1.52227e+08	0.419	0.0374344	50591.3	4485.64		0.740333	0.0936346	122767	14720.6	0.861677	0.637928
JW0691	ECK0690	b0702	ybfB	2	15	9	A	18	B		0.612	39410.6	2249391600	0.346	43394	125416		1.084	59385.5	2463396300	0.508	55259	108778		0.814	57451.7	2632774500	0.485	56362	116210		52082.6	6360.56	2448520800	1.10923e+08	0.446333	0.0506041	51671.7	4151.06		0.836667	0.136725	116801	4812.24	0.861677	0.720936
JW1354	ECK1357	b1359	ydaU	2	13	10	A	19	B		0.647	48686.7	1800800100	0.405	35406	87422.2		0.934	57284.3	1716732900	0.488	40538	83069.7		0.812	63036.9	1420154100	0.508	30485	60009.8		56336	4169.6	1645895700	1.1545e+08	0.467	0.0315331	35476.3	2902.26		0.797667	0.0831592	76833.9	8505.35	0.861677	0.687331
JW0783	ECK0787	b0798	ybiA	2	15	10	A	20	B		0.671	35241.2	859607100	0.408	15070	36936.3		1.113	65236.6	138942900	0.509	3133	6155.21		0.969	66115.4	153140400	0.522	3181	6093.87		55531	10148.1	383896800	2.3789e+08	0.479667	0.0360293	7128	3971.02		0.917667	0.13015	16395.1	10270.6	0.861677	0.790732
JW1408	ECK1404	b1411	ynbD	2	13	11	A	21	B		0.749	47353.9	304673400	0.43	6155	14314		1.196	63501.7	227143800	0.581	5176	8908.78		0.716	54634.9	282465900	0.457	5821	12737.4		55163.5	4668.93	271427700	2.30513e+07	0.489333	0.0464913	5717.33	287.327		0.887	0.154793	11986.7	1604.85	0.861677	0.764307
JW0842	ECK0849	b0858	ybjO	2	15	11	A	22	B		0.76	46159.1	473013000	0.43	10268	23879.1		1.016	47708.4	529968600	0.485	11627	23973.2		0.918	52363.3	366210000	0.47	7695	16372.3		48743.6	1864.28	456397200	4.79975e+07	0.461667	0.0164148	9863.33	1152.96		0.898	0.0745743	21408.2	2518.08	0.861677	0.773786
JW1018	ECK1021	b1035	ycdY	2	15	12	A	24	B		0.862	45866.2	2485891800	0.451	53469	118557		1.368	55220.4	2606143500	0.552	78850	142844		0.947	57323.4	2562426900	0.504	63415	125823		52803.3	3521.31	2551487400	3.5142e+07	0.502333	0.0291681	65244.7	7383.76		1.059	0.156436	129075	7197.24	0.740584	0.784278
JW1755	ECK1764	b1766	sppA	2	9	1	B	1	C		0.523	38559.8	2624417100	0.34	48522	142712		1.175	58539.9	2536459200	0.542	61754	113937		0.922	59251	1844487000	0.522	43432	83203.1		52116.9	6781.65	2335121100	2.46628e+08	0.468	0.0642599	51236	5460.41		0.873333	0.189783	113284	17181.8	0.740584	0.646777
JW2446	ECK2457	b2462	ypfE	2	11	1	B	2	C		0.551	39456.4	2252670300	0.346	41955	121257		0.896	56585.8	2274874200	0.493	48031	97426		0.841	57778.7	1948446900	0.487	43879	90100.6		51273.6	5918.62	2158663800	1.05304e+08	0.442	0.0480312	44621.7	1792.87		0.762667	0.107018	102928	9405.45	0.861677	0.657172
JW2325	ECK2322	b2328	mepA	2	9	2	B	3	C		0.515	37415	3517411500	0.333	64658	194168		0.741	50835.2	3305059200	0.439	68104	155134		0.724	55916.6	2707574400	0.474	57872	122093		48055.6	5518.83	3176681700	2.42432e+08	0.415333	0.0423884	63544.7	3005.72		0.66	0.0726659	157132	20830.3	0.946387	0.624615
JW2723	ECK2748	b2753	iap	2	9	3	B	5	C		0.652	50487.7	2656557000	0.44	49233	111893		0.759	56920.9	3099042000	0.474	60967	128622		0.835	67666.2	2626144200	0.555	55798	100537		58358.2	5010.83	2793914400	1.52816e+08	0.489667	0.0341093	55332.7	3395.3		0.748667	0.0530796	113684	8156.87	0.946387	0.708528
JW2609	ECK2624	b2628	yfjL	2	11	3	B	6	C		0.578	37940.4	2583421200	0.332	49087	147852		0.789	47012.2	2507208300	0.397	50226	126514		0.842	55953.7	1788337800	0.476	39367	82703.8		46968.8	5200.04	2292989100	2.53283e+08	0.401667	0.0416347	46226.7	3445.56		0.736333	0.0806315	119023	19176.1	0.946387	0.696856
JW3098	ECK3117	b3129	sohA	2	9	4	B	7	C		0.536	38819.7	2336633100	0.342	44082	128895		0.665	41852.8	2659041000	0.364	51343	141052		0.843	53491.1	1902873600	0.46	41283	89745.7		44721.2	4471.53	2299515900	2.19074e+08	0.388667	0.0362277	45569.3	2997.78		0.681333	0.0889988	119898	15479	0.946387	0.644805
JW2627	ECK2643	b2646	ypjF	2	11	4	B	8	C		0.71	56736.7	455496300	0.439	8078	18400.9		0.817	64334.1	482126400	0.476	9548	20058.8		0.793	67635.9	396724500	0.501	8759	17483		62902.2	3226.75	444782400	2.52287e+07	0.472	0.0180093	8795	424.734		0.773333	0.0324157	18647.6	753.726	0.946387	0.731873
JW3869	ECK3891	b3898	frvX	2	9	5	B	9	C		0.588	42082	2091519900	0.367	36731	100084		0.751	48633.4	2344560300	0.408	44482	109025		0.815	59686.8	1910027700	0.509	40515	79597.2		50134.1	5137.16	2115369300	1.26004e+08	0.428	0.042194	40576	2237.73		0.718	0.0675747	96235.4	8710.19	0.946387	0.679506
JW2719	ECK2744	b2749	ygbE	2	11	5	B	10	C		0.348	32697.5	5149449900	0.297	86201	290239		0.496	39687.8	5964066000	0.323	108524	335988		0.547	49628.3	5462722800	0.383	111229	290415		40671.2	4912.2	5525412900	2.37239e+08	0.334333	0.0254646	101985	7930.37		0.463667	0.0596778	305547	15220.3	0.946387	0.438808
JW3465	ECK3483	b3498	prlC	2	9	6	B	11	C		0.449	40940.9	1663630200	0.347	29490	84985.6		0.722	52147.8	1863905400	0.426	34071	79978.9		0.765	62212.2	1428921000	0.494	28610	57915		51767	6143.45	1652152200	1.257e+08	0.422333	0.0424748	30723.7	1692.84		0.645333	0.0989484	74293.1	8315.65	0.946387	0.610735
JW1563	ECK1565	b1571	ydfA	2	11	6	B	12	C		0.64	59880.5	355431600	0.5	6145	12290		0.699	69754.5	285819300	0.57	5576	9782.46		0.882	83215.7	244814400	0.642	5130	7990.65		70950.2	6762.77	295355100	3.22864e+07	0.570667	0.0409932	5617	293.722		0.740333	0.0728522	10021	1246.83	0.946387	0.700642
JW4133	ECK4171	b4175	hflC	2	9	7	B	13	C		0.441	39994.7	2190335400	0.338	41929	124050		0.752	51898.9	1970352000	0.445	41218	92624.7		0.787	62833.6	1485192600	0.495	33848	68379.8		51575.7	6594.99	1881960000	2.083e+08	0.426	0.0463069	38998.3	2583.33		0.66	0.109965	95018.3	16115.2	0.946387	0.624615
JW1617	ECK1621	b1625	ydgT	2	11	7	B	14	C		0.507	38515.1	1600581600	0.356	29284	82258.4		0.901	67527	219999600	0.501	4597	9175.65		0.975	70203.8	206349300	0.537	4481	8344.51		58748.6	10146.2	675643500	4.62486e+08	0.464667	0.0553183	12787.3	8248.4		0.794333	0.145246	33259.5	24500.6	0.946387	0.751747
JW2219	ECK2218	b2225	yfaP	2	9	8	B	15	C		0.405	31642.5	2840407200	0.296	48931	165307		0.867	48439.9	1391584500	0.42	32480	77333.3		0.783	52051.8	1400127300	0.454	34323	75601.3		44044.7	6288.17	1877373000	4.81523e+08	0.39	0.0480139	38578	5203.77		0.685	0.142084	106081	29617.6	0.946387	0.648275
JW1662	ECK1668	b1672	ydhW	2	11	8	B	16	C		1.166	72138.9	746045100	0.597	14911	24976.5		1.031	74850	873411300	0.575	18330	31878.3		0.847	71509.4	847911600	0.528	18112	34303		72832.8	1024.87	822456000	3.89081e+07	0.566667	0.0203497	17117.7	1105.13		1.01467	0.0924488	30385.9	2793.81	0.946387	0.960267
JW5964	ECK2237	b4543	ypaA	2	9	9	B	17	C		0.533	40871.2	1467960300	0.348	27527	79100.6		0.866	59230.3	1497135600	0.497	30929	62231.4		0.651	57360.3	1000746000	0.465	20949	45051.6		52487.3	5833.09	1321947300	1.60821e+08	0.436667	0.0452855	26468.3	2929.2		0.683333	0.0974788	62127.9	9829.22	0.946387	0.646698
JW1749	ECK1758	b1760	ynjH	2	11	9	B	18	C		0.622	40874.5	1978461000	0.375	36340	96906.7		0.919	55707.7	2351187900	0.439	47923	109164		0.812	58885.7	2226159000	0.487	45765	93973.3		51822.6	5550.42	2185269300	1.09522e+08	0.433667	0.0324414	43342.7	3556.32		0.784333	0.0868453	100015	4652.39	0.946387	0.742283
JW2288	ECK2285	b2291	yfbR	2	9	10	B	19	C		0.708	41361	2189237400	0.379	40487	106826		0.982	53915.9	2270598300	0.458	47186	103026		0.845	58768.7	1962289800	0.494	37155	75212.6		51348.5	5186.52	2140708500	9.22493e+07	0.443667	0.0339624	41609.3	2949.57		0.845	0.079097	95021.5	9965.04	0.946387	0.799697
JW1809	ECK1818	b1820	yobD	2	11	10	B	20	C		0.794	56368.7	482209200	0.453	9759	21543		1.086	70450.1	392150700	0.555	8909	16052.3		0.943	71767.3	408987900	0.53	9240	17434		66195.4	4928.02	427782600	2.7644e+07	0.512667	0.0306938	9302.67	247.366		0.941	0.0842991	18343.1	1648.95	0.946387	0.89055
JW2355	ECK2352	b2358	yfdO	2	9	11	B	21	C		0.579	38421.4	2167146000	0.353	43334	122759		0.7	45828.2	2622910500	0.406	60186	148241		0.664	52040.6	2176958700	0.446	47604	106735		45430.1	3936.58	2322338400	1.50313e+08	0.401667	0.0269341	50374.7	5058.16		0.647667	0.0358717	125912	12085	0.946387	0.612943
JW1837	ECK1849	b1848	yebG	2	11	11	B	22	C		0.636	42190.7	2099480400	0.367	36542	99569.5		0.731	49811.6	2353243500	0.41	45312	110517		0.719	54384	2437434900	0.457	41059	89844.6		48795.4	3556.41	2296719600	1.0157e+08	0.411333	0.0259893	40971	2532.06		0.695333	0.0298682	99977.1	5971.1	0.946387	0.658054
JW2412	ECK2414	b2419	yfeK	2	9	12	B	23	C		0.697	49270.6	684561600	0.43	14643	34053.5		1.576	73614.1	541746900	0.624	12254	19637.8		0.895	62733.2	543498300	0.524	12739	24311.1		61872.6	7040.51	589935600	4.73157e+07	0.526	0.0560119	13212	729.069		1.056	0.266209	26000.8	4246.34	0.861677	0.909931
JW1900	ECK1914	b1915	yecF	2	11	12	B	24	C		0.881	43679.3	2773002600	0.439	66744	152036		1.179	46219.9	2225059200	0.541	56797	104985		0.934	61779.3	622899900	0.555	16516	29758.6		50559.5	5657.63	1873653900	6.45071e+08	0.511667	0.0365574	46685.7	15355.7		0.998	0.0917842	95593.4	35609.6	0.740584	0.739103
JW1995	ECK2007	b2013	yeeE	2	13	1	B	1	D		0.842	52588.3	230744700	0.448	4396	9812.5		-0.013	13953.1	169837200	0.084	3213	38250		1.279	74971.3	166556700	0.629	3941	6265.5		47170.9	17821.5	189046200	2.08707e+07	0.387	0.160257	3850	344.52		0.702667	0.379419	18109.3	10122.3	0.740584	0.520384
JW1468	ECK1466	b1472	yddL	2	15	1	B	2	D		0.532	37589.8	1475876700	0.313	26657	85166.1		0.52	31495.8	2079760500	0.308	45262	146955		0.729	53489.4	1132930800	0.431	28741	66684.5		40858.3	6555.99	1562856000	2.76764e+08	0.350667	0.0401926	33553.3	5885.16		0.593667	0.0677553	99601.7	24270.1	0.861677	0.511549
JW2105	ECK2109	b2118	yehI	2	13	2	B	3	D		0.649	41021.4	2453562000	0.375	41461	110563		0.837	48093.1	2609701200	0.449	46600	103786		0.868	57504.2	2027314800	0.496	40221	81090.7		48872.9	4774.14	2363526000	1.74043e+08	0.44	0.0352184	42760.7	1952.76		0.784667	0.0684211	98479.9	8911.91	0.946387	0.742598
JW1545	ECK1547	b1553	ydfP	2	15	2	B	4	D		0.534	38269.1	2395104300	0.35	43035	122957		0.718	42636.2	2890872000	0.412	50726	123121		0.757	56629.7	2013573600	0.472	41461	87841.1		45845	5537.76	2433183300	2.53969e+08	0.411333	0.0352199	45074	2862.29		0.669667	0.0687613	111307	11732.8	1	0.669667
JW0988	ECK0994	b1003	yccJ	2	13	4	B	7	D		0.441	40768.5	1791836100	0.347	31606	91083.6		0.656	50986	2083470300	0.431	37140	86171.7		0.817	58191	1761573600	0.496	33855	68256		49981.8	5054.46	1878960000	1.02628e+08	0.424667	0.043129	34200.3	1606.83		0.638	0.108914	81837.1	6936.99	1	0.638
JW0355	ECK0360	b0363	yaiP	2	15	4	B	8	D		0.389	34890	2543545800	0.307	44860	146124		0.636	44277.8	2515478400	0.386	47029	121837		0.726	51736	1820368800	0.448	36910	82388.4		43634.6	4873.62	2293131000	2.3652e+08	0.380333	0.0408017	42933	3075.9		0.583667	0.100741	116783	18571.5	1	0.583667
JW0394	ECK0398	b0404	yajB	2	15	5	B	10	D		0.375	33197.8	2411082000	0.298	39072	131114		0.631	42587.8	2067166800	0.364	42559	116920		0.816	54245.2	1420897500	0.469	34160	72835.8		43343.6	6087.6	1966382100	2.9025e+08	0.377	0.0497896	38597	2436.19		0.607333	0.127855	106957	17545.6	1	0.607333
JW0503	ECK0508	b0515	ylbA	2	15	6	B	12	D		0.429	37715.7	1578222900	0.318	29195	91808.2		0.795	52268.8	1871898300	0.449	36955	82305.1		0.918	65218.1	1616045400	0.557	35199	63193.9		51734.2	7943.75	1688722200	9.22366e+07	0.441333	0.0690998	33783	2349.34		0.714	0.146857	79102.4	8414.02	1	0.714
JW1167	ECK1166	b1178	ycgK	2	13	7	B	13	D		0.388	32257	2637996300	0.279	45774	164065		0.796	48059.6	2592735300	0.413	52188	126363		0.787	62332.5	1977179400	0.518	43508	83992.3		47549.7	8685.79	2402637000	2.1313e+08	0.403333	0.0691624	47156.7	2599.32		0.657	0.134525	124807	23128	1	0.657
JW0556	ECK0559	b0567	ybcH	2	15	7	B	14	D		0.657	46773.1	1566019800	0.405	30292	74795.1		0.77	54677.7	1914323400	0.444	37767	85060.8		0.848	65126.4	1657528200	0.504	33536	66539.7		55525.7	5315.09	1712623800	1.04252e+08	0.451	0.0287924	33865	2164.11		0.758333	0.0554447	75465.2	5357.08	1	0.758333
JW1251	ECK1253	b1259	yciG	2	13	8	B	15	D		0.312	30404.8	2081869200	0.272	34361	126327		0.713	44491.5	2150346600	0.388	46588	120072		0.756	50657.4	1880349300	0.433	44096	101838		41851.2	5993.62	2037521700	8.10343e+07	0.364333	0.0479595	41681.7	3730.35		0.593667	0.141379	116079	7345.83	1	0.593667
JW0640	ECK0638	b0645	ybeR	2	15	8	B	16	D		0.552	48288.8	1678661100	0.42	30629	72926.2		0.882	58188.8	1835852400	0.495	35593	71905.1		0.802	62840.6	1743521400	0.521	33419	64144		56439.4	4290.85	1752678300	4.56076e+07	0.478667	0.0302783	33213.7	1436.66		0.745333	0.099387	69658.4	2772.93	1	0.745333
JW1326	ECK1328	b1332	ynaJ	2	13	9	B	17	D		0.454	35757.4	2138687100	0.32	40727	127272		0.952	51904.1	1964542500	0.455	43949	96591.2		0.8	57170.4	1818195300	0.488	39817	81592.2		48277.3	6441.89	1973808300	9.26339e+07	0.421	0.0513907	41497.7	1253.5		0.735333	0.147351	101818	13443.1	1	0.735333
JW0693	ECK0692	b0704	ybfC	2	15	9	B	18	D		0.473	42077.7	2847275100	0.367	50816	138463		0.702	51846	3839992200	0.445	75058	168670		0.614	57194.3	3355839900	0.45	65230	144956		50372.7	4425.53	3347702400	2.86602e+08	0.420667	0.0268721	63701.3	7039.68		0.596333	0.0666942	150696	9180.11	1	0.596333
JW0787	ECK0791	b0802	ybiJ	2	15	10	B	20	D		0.65	43265	1927810800	0.389	40066	102997		0.866	49389.3	2099334600	0.456	48975	107401		0.817	56795.7	1607498100	0.494	35203	71261.1		49816.7	3911.81	1878214500	1.4413e+08	0.446333	0.0306938	41414.7	4032.42		0.777667	0.0653818	93886.6	11384	1	0.777667
JW1411	ECK1407	b1414	ydcF	2	13	11	B	21	D		0.696	42420.3	1789503300	0.385	39702	103122		0.843	48837.6	2015105400	0.444	49462	111401		0.769	53208	1735641900	0.462	41079	88915.6		48155.3	3132.76	1846750200	8.56015e+07	0.430333	0.0232546	43414.3	3049.85		0.769333	0.0424356	101146	6565.71	1	0.769333
JW0860	ECK0867	b0876	ybjD	2	15	11	B	22	D		0.675	38634.5	1753776900	0.403	31984	79364.8		1.161	64167.2	220438800	0.538	4827	8972.12		0.979	65646.4	188246700	0.538	4047	7522.3		56149.3	8767.84	720820800	5.16562e+08	0.493	0.045	13619.3	9185.09		0.938333	0.141762	31953.1	23709.5	0.946387	0.888026
JW1432	ECK1430	b1436	yncJ	2	13	12	B	23	D		0.653	43258.4	2709852300	0.388	58238	150098		1.013	57281.7	3015468000	0.497	75788	152491		0.737	51944.1	2384159400	0.448	55803	124560		50828.1	4086.45	2703159900	1.82274e+08	0.444333	0.031519	63276.3	6295.2		0.801	0.108738	142383	8938.13	0.861677	0.690203
JW1818	ECK1828	b1829	htpX	2	9	1	C	1	E		0.535	41252.8	1934756100	0.353	36606	103700		1.043	61263.2	1751409900	0.557	43693	78443.4		0.964	65395.8	1286812800	0.563	31178	55378.3		55970.6	7454.95	1657659600	1.92829e+08	0.491	0.0690217	37159	3623.33		0.847333	0.157823	79173.8	13954	0.740584	0.627522
JW2450	ECK2461	b2466	ypfG	2	11	1	C	2	E		0.525	39521.6	2547259200	0.361	46312	128288		0.825	56937.3	2817996300	0.481	57979	120538		0.758	58108.3	2501148600	0.499	54094	108405		51522.4	6009.92	2622134700	9.88313e+07	0.447	0.0433128	52795	3430.03		0.702667	0.0909145	119077	5786.13	0.861677	0.605472
JW2382	ECK2381	b2385	ypdF	2	9	2	C	3	E		0.585	43991.2	2375420400	0.41	45293	110471		0.741	46854.4	2494327500	0.423	48497	114650		0.857	56719.1	1737149400	0.5	37314	74628		49188.2	3855.07	2202299100	2.35094e+08	0.444333	0.0280852	43701.3	3324.9		0.727667	0.0788021	99916.3	12701.6	0.946387	0.688654
JW2570	ECK2584	b2586	yfiM	2	11	2	C	4	E		0.513	42215.5	2143193400	0.354	36744	103797		0.745	53728.7	2350876500	0.433	41677	96251.7		0.717	59998.2	2073114000	0.468	39761	84959.4		51980.8	5207.3	2189061300	8.33984e+07	0.418333	0.0337161	39394	1435.81		0.658333	0.0731148	95002.6	5473.58	1	0.658333
JW2789	ECK2817	b2821	ptr	2	9	3	C	5	E		0.567	50646.2	2061066600	0.437	34534	79025.2		0.822	60703.7	2182728600	0.499	37379	74907.8		0.799	67358.7	1772600400	0.559	33200	59391.8		59569.5	4857.68	2005465200	1.21614e+08	0.498333	0.0352199	35037.7	1232.38		0.729333	0.0814378	71108.3	5977.6	1	0.729333
JW2610	ECK2625	b2629	yfjM	2	11	3	C	6	E		0.49	40444.1	2560073400	0.352	44142	125403		0.72	46721.3	2455192800	0.401	44688	111441		0.847	57592.9	1779878700	0.499	35392	70925.9		48252.8	5009.3	2265048300	2.44467e+08	0.417333	0.0432139	41407.3	3011.79		0.685667	0.104477	102590	16337.2	1	0.685667
JW3127	ECK3146	b3158	yhbU	2	9	4	C	7	E		0.523	38554.7	2521386000	0.345	44234	128214		0.746	48422.9	2655729900	0.402	48335	120236		0.861	57670.4	1863140400	0.504	37957	75311.5		48216	5519.21	2346752100	2.44896e+08	0.417	0.0465081	43508.7	3017.74		0.71	0.0992186	107921	16466.5	1	0.71
JW2631	ECK2650	b4462	ygaR	2	11	4	C	8	E		0.473	41656.1	1769076900	0.348	33469	96175.3		0.726	53684.3	2045920500	0.411	39476	96048.7		0.772	59397.9	1625066100	0.472	33873	71764.8		51579.5	5228.62	1813354500	1.23491e+08	0.410333	0.0357973	35606	1938.51		0.657	0.0929534	87996.3	8115.8	1	0.657
JW3823	ECK3839	b3847	pepQ	2	9	5	C	9	E		0.403	31383.1	3270133800	0.281	57664	205210		0.661	42023.4	1790033400	0.37	39375	106419		0.711	42970.7	2217912300	0.389	49739	127864		38792.4	3714.73	2426026500	4.39757e+08	0.346667	0.0332883	48926	5295.21		0.591667	0.0954312	146498	30001.8	1	0.591667
JW3434	ECK3453	b3469	zntA	2	9	6	C	11	E		0.45	39287.5	1372889700	0.336	24195	72008.9		0.723	52603.8	1789955100	0.425	35094	82574.1		0.862	60718.3	1562431500	0.52	35862	68965.4		50869.9	6246.99	1575092100	1.20563e+08	0.427	0.0531256	31717	3767.53		0.678333	0.121013	74516.1	4123.67	1	0.678333
JW1565	ECK1567	b1573	ydfC	2	11	6	C	12	E		0.567	51698.1	444123000	0.422	7287	17267.8		0.833	62308.6	586677600	0.465	10592	22778.5		1.012	71477	507017700	0.535	10335	19317.8		61827.9	5714.75	512606100	4.12467e+07	0.474	0.0329292	9404.67	1061.43		0.804	0.129276	19788	1608.09	1	0.804
JW4217	ECK4253	b4260	pepA	2	9	7	C	13	E		0.271	31745.3	2996740800	0.262	43305	165286		0.424	40897.6	3709451700	0.337	63405	188145		0.463	48577	3045012300	0.389	54640	140463		40406.6	4865.07	3250401600	2.29948e+08	0.329333	0.0368616	53783.3	5818.16		0.386	0.0585918	164631	13768.7	1	0.386
JW1618	ECK1622	b1626	ydgK	2	11	7	C	14	E		0.438	39485.2	1900544400	0.326	31238	95822.1		0.787	59187.4	1895410800	0.45	36068	80151.1		0.875	66256.3	1437167700	0.517	28291	54721.5		54976.3	8009.83	1744374300	1.5361e+08	0.431	0.0559494	31865.7	2266.86		0.7	0.13344	76898.2	11975.7	1	0.7
JW2220	ECK2219	b2226	yfaQ	2	9	8	C	15	E		0.365	32517	2154619800	0.292	35610	121952		0.635	41709.8	1981602000	0.362	40853	112854		0.781	49022.6	2035905300	0.43	46414	107940		41083.1	4775.03	2057375700	5.10866e+07	0.361333	0.0398386	40959	3119.3		0.593667	0.121854	114248	4104.74	1	0.593667
JW1675	ECK1682	b1685	ydiH	2	11	8	C	16	E		0.654	54287.5	340894800	0.451	6000	13303.8		0.986	65606.7	388818900	0.498	7547	15154.6		1.082	73534.9	383610600	0.561	7880	14046.3		64476.4	5584.94	371108100	1.51813e+07	0.503333	0.031866	7142.33	579.2		0.907333	0.129663	14168.2	537.759	1	0.907333
JW2239	ECK2238	b2245	yfaU	2	9	9	C	17	E		0.494	44565	1477570500	0.376	26991	71784.6		0.793	54283.8	1640466000	0.436	32041	73488.5		0.813	61167.3	1418615100	0.51	28144	55184.3		53338.7	4815.91	1512217200	6.63444e+07	0.440667	0.0387528	29058.7	1527.86		0.7	0.103162	66819.1	5838.17	1	0.7
JW2296	ECK2293	b2299	yfcD	2	9	10	C	19	E		0.579	46276.9	1741582800	0.384	32559	84789.1		0.866	55264.7	1746661500	0.465	36192	77832.3		0.83	56443.8	1365453000	0.493	28482	57772.8		52661.8	3210.53	1617899100	1.26232e+08	0.447333	0.032682	32411	2226.92		0.758333	0.0902669	73464.7	8098.89	1	0.758333
JW1814	ECK1823	b1825	yebO	2	11	10	C	20	E		0.832	56452.5	865491300	0.483	17574	36385.1		1.151	67855.1	470416500	0.576	10567	18345.5		1.006	65775.9	454362300	0.545	10025	18394.5		63361.1	3506.08	596756700	1.34447e+08	0.534667	0.0273394	12722	2431.04		0.996333	0.0922141	24375	6005.05	1	0.996333
JW2357	ECK2354	b2360	yfdQ	2	9	11	C	21	E		0.857	58622.6	615641400	0.485	12673	26129.9		1.035	65225.2	681052500	0.523	15862	30328.9		0.976	68914.9	557191800	0.556	12138	21830.9		64254.2	3010.54	617961900	3.57743e+07	0.521333	0.0205129	13557.7	1162.47		0.956	0.0523482	26096.6	2453.2	1	0.956
JW2425	ECK2427	b2432	yfeY	2	9	12	C	23	E		0.681	46741.9	1871430300	0.408	35661	87404.4		1.035	57770.1	2075838300	0.521	48799	93664.1		0.854	59444.8	1494985500	0.518	31315	60453.7		54652.3	3984.64	1814084700	1.70112e+08	0.482333	0.0371768	38591.7	5255.61		0.856667	0.1022	80507.4	10188.4	0.861677	0.73817
JW1913	ECK1927	b1928	yedD	2	11	12	C	24	E		0.874	46335.9	2994223500	0.481	68411	142227		1.811	79454.5	208939500	0.715	5880	8223.78		1.143	72057.3	356668200	0.637	9390	14741		65949.2	10036.5	1186610400	9.04812e+08	0.611	0.0687895	27893.7	20284		1.276	0.278543	55063.8	43622	0.740584	0.944985
JW2058	ECK2067	b2073	yegL	2	13	1	C	1	F		0.563	39295.6	1905103800	0.349	34777	99647.6		0.86	51178.9	2312199900	0.512	50183	98013.7		0.992	59547.3	1423961100	0.541	32703	60449.2		50007.3	5875.44	1880421600	2.56709e+08	0.467333	0.059756	39221	5513.6		0.805	0.126858	86036.8	12802.5	0.740584	0.59617
JW1469	ECK1467	b1473	yddG	2	15	1	C	2	F		0.508	34715.2	2380053600	0.328	43900	133841		1.068	64087	1313942400	0.595	30323	50963		0.868	50233.1	1660011300	0.452	40206	88951.3		49678.4	8483.46	1784669100	3.14008e+08	0.458333	0.0771413	38143	4052.81		0.814667	0.163843	91251.9	23952.6	0.861677	0.70198
JW2106	ECK2110	b4541	yehK	2	13	2	C	3	F		0.522	35317.7	2521488600	0.336	46214	137542		0.815	46549.3	2085255000	0.427	44961	105295		0.903	47957	1744553700	0.44	41601	94547.7		43274.7	3999.19	2117099100	2.24846e+08	0.401	0.0327159	44258.7	1377.18		0.746667	0.11517	112461	12918.2	0.946387	0.706636
JW0239	ECK0252	b0250	ykfB	2	15	2	C	4	F		0.615	46614.7	1461520800	0.439	26148	59562.6		0.969	63565	297148500	0.503	5278	10493		0.963	68176.4	226797300	0.548	4525	8257.3		59452	6555.25	661822200	4.00365e+08	0.496667	0.0316245	11983.7	7085.5		0.849	0.117013	26104.3	16741.6	1	0.849
JW0284	ECK0289	b0290	yagW	2	15	3	C	6	F		0.401	37863.9	2271451500	0.321	39258	122299		0.701	47796.8	2295710100	0.389	41941	107817		0.664	56375.9	1889242200	0.461	38616	83765.7		47345.5	5348.72	2152134600	1.31633e+08	0.390333	0.04042	39938.3	1018.34		0.588667	0.0944393	104627	11237.4	1	0.588667
JW0356	ECK0361	b0364	yaiS	2	15	4	C	8	F		0.424	35580.4	2241655200	0.317	38784	122347		0.607	42092.3	2167139700	0.362	43659	120605		0.788	49344.8	2100556800	0.432	48023	111164		42339.2	3975.36	2169783900	4.07531e+07	0.370333	0.0334581	43488.7	2668.43		0.606333	0.105078	118039	3473.8	1	0.606333
JW1050	ECK1048	b1063	yceB	2	13	5	C	9	F		0.521	43417	1792377900	0.376	29850	79388.3		0.817	55794.4	1719941400	0.47	30172	64195.7		0.833	61174.8	1556433000	0.519	29087	56044.3		53462.1	5257.21	1689584100	6.97822e+07	0.455	0.0419563	29703	321.721		0.723667	0.101439	66542.8	6840.24	1	0.723667
JW0400	ECK0404	b0410	yajD	2	15	5	C	10	F		0.355	32270.1	2549022300	0.294	41531	141262		0.688	44296.7	1705423500	0.378	35429	93727.5		0.768	46810.8	1596732300	0.407	38767	95250.6		41125.9	4486.96	1950392700	3.00955e+08	0.359667	0.0338838	38575.7	1764.09		0.603667	0.12646	110080	15597.1	1	0.603667
JW1133	ECK1133	b1147	ymfL	2	13	6	C	11	F		0.509	39965.5	2269054800	0.353	40836	115683		0.744	47617.5	2548549800	0.405	48704	120257		0.803	57829.9	2136288600	0.499	44477	89132.3		48471	5174.65	2317964400	1.21496e+08	0.419	0.0427239	44672.3	2273.39		0.685333	0.0897967	108357	9702.76	1	0.685333
JW0508	ECK0512	b0519	ylbE	2	15	6	C	12	F		0.447	38367.1	1748917800	0.322	29169	90587		0.66	45652.9	1879594200	0.388	33916	87412.4		0.626	57096.5	1473147900	0.453	28714	63386.3		47038.8	5450.96	1700553300	1.19797e+08	0.387667	0.0378168	30599.7	1663.36		0.577667	0.0660665	80461.9	8586.83	1	0.577667
JW1183	ECK1182	b1194	ycgR	2	13	7	C	13	F		0.527	37226.8	1986355800	0.349	30242	86653.3		0.814	49167.9	2566337400	0.44	44318	100723		1.037	66621.1	2155586400	0.566	44666	78915.2		51005.2	8534.98	2236093200	1.72197e+08	0.451667	0.0629135	39742	4751.06		0.792667	0.14761	88763.7	6383.12	1	0.792667
JW0562	ECK0565	b0573	cusF	2	15	7	C	14	F		0.498	41666.6	877500000	0.357	14037	39319.3		0.578	39437.1	2643935400	0.355	48485	136577		0.736	48882.9	2611616400	0.437	49345	112918		43328.8	2850.61	2044350600	5.835e+08	0.383	0.0270062	37289	11628.7		0.604	0.0699238	96271.5	29283.7	1	0.604
JW0641	ECK0639	b0646	djlB	2	15	8	C	16	F		0.442	39072.4	1614463200	0.342	27806	81304.1		0.724	45740.4	1733899500	0.403	31778	78853.6		0.902	60207.4	1545247800	0.538	29931	55633.8		48340.1	6238.07	1631203500	5.50985e+07	0.427667	0.0579089	29838.3	1147.55		0.689333	0.133917	71930.5	8178.99	1	0.689333
JW0694	ECK0693	b4514	ybfQ	2	15	9	C	18	F		0.449	34380.1	2139603300	0.306	39867	130284		0.768	46047.5	1973135700	0.404	41237	102072		0.749	50384.9	1569562200	0.447	32596	72921.7		43604.2	4778.97	1894100400	1.69235e+08	0.385667	0.0417226	37900	2681.33		0.655333	0.103312	101759	16559.9	1	0.655333
JW1359	ECK1363	b1365	ynaK	2	13	10	C	19	F		0.398	33490.1	2677338900	0.3	48282	160940		0.573	41678	2677431600	0.362	60431	166936		0.671	46615	2076954300	0.411	46919	114158		40594.3	3827.37	2477241600	2.00144e+08	0.357667	0.0321161	51877.3	4294.89		0.547333	0.0798464	147345	16683.4	1	0.547333
JW0788	ECK0792	b0803	ybiI	2	15	10	C	20	F		0.381	34028.5	1935854100	0.274	37151	135588		0.661	47308.8	1741198500	0.388	37217	95920.1		0.699	52217.5	1673793900	0.431	37336	86626.5		44518.2	5432.93	1783615500	7.85669e+07	0.364333	0.0468413	37234.7	54.1305		0.580333	0.100269	106045	15013.1	1	0.580333
JW1416	ECK1411	b1419	ydcA	2	13	11	C	21	F		0.612	42188	2030299200	0.381	35397	92905.5		0.802	50468.6	1972461600	0.459	35672	77716.8		0.797	55910.8	1820392200	0.496	32970	66471.8		49522.5	3989.56	1941051000	6.25971e+07	0.445333	0.0338936	34679.7	858.512		0.737	0.0625167	79031.4	7659.02	1	0.737
JW0902	ECK0910	b0919	ycbJ	2	15	11	C	22	F		0.578	38575.2	2790530100	0.363	59890	164986		0.757	46966.4	2759605200	0.423	68385	161667		0.753	52716.9	2349382500	0.463	53580	115724		46086.2	4106.01	2633172600	1.42176e+08	0.416333	0.0290593	60618.3	4289.32		0.696	0.0590113	147459	15896.5	0.946387	0.658685
JW1433	ECK1432	b1438	ydcQ	2	13	12	C	23	F		0.625	37144.4	3246232500	0.367	67135	182929		0.772	41114.2	2596191300	0.39	63318	162354		0.69	41177.8	2464406100	0.376	60328	160447		39812.1	1333.97	2768943300	2.41658e+08	0.377667	0.00669162	63593.7	1969.84		0.695667	0.0425297	168577	7197.36	0.861677	0.59944
JW1043	ECK1041	b1056	yceI	2	15	12	C	24	F		0.911	55348	1376954100	0.463	31097	67164.1		1.64	71901.4	1116748800	0.637	33710	52919.9		1.116	69079	944995500	0.568	25363	44653.2		65442.8	5112.74	1146232800	1.25564e+08	0.556	0.0505866	30056.7	2465.08		1.22233	0.217056	54912.4	6574.28	0.740584	0.905241
JW1819	ECK1829	b1830	prc	2	9	1	D	1	G		0.73	45347.2	2428157700	0.432	51818	119949		1.2	61969	1918151100	0.599	48322	80671.1		0.999	60864.3	1658142000	0.549	40828	74367.9		56060.2	5365.95	2001483600	2.26156e+08	0.526667	0.0494851	46989.3	3241.76		0.976333	0.13615	91662.7	14259.7	0.740584	0.723057
JW2457	ECK2468	b4547	ypfN	2	11	1	D	2	G		0.506	38244.9	1276766100	0.34	23245	68367.6		1.102	62574.4	1103031900	0.565	24103	42660.2		0.948	58999.9	965722500	0.525	20991	39982.9		53273	7584.61	1115173500	8.99955e+07	0.476667	0.0693021	22779.7	927.997		0.852	0.178621	50336.9	9048.44	0.861677	0.734149
JW2476	ECK2487	b2491	hyfR	2	9	2	D	3	G		0.521	40627	2655300600	0.358	48912	136626		0.761	50250.8	2285401500	0.432	44277	102493		0.815	58269.7	1812254400	0.492	35636	72430.9		49715.8	5100.03	2250985500	2.43974e+08	0.427333	0.0387528	42941.7	3890.17		0.699	0.0903549	103850	18543.9	0.946387	0.661525
JW2840	ECK2868	b2872	ygeY	2	9	3	D	5	G		0.415	34837.6	3438324900	0.311	57589	185174		0.7	44815.1	3035394900	0.382	51130	133848		0.917	58785.4	1759839300	0.521	36858	70744.7		46146	6945.1	2744519700	5.05894e+08	0.404667	0.0616721	48525.7	6124.55		0.677333	0.145357	129922	33091.1	1	0.677333
JW2611	ECK2626	b2630	yfjN	2	11	3	D	6	G		0.702	58422.6	401189400	0.484	6519	13469		0.817	66052.7	475306200	0.494	8558	17323.9		1.029	71963.7	399195900	0.55	8444	15352.7		65479.7	3919.47	425230500	2.50445e+07	0.509333	0.0205372	7840.33	661.486		0.849333	0.0957711	15381.9	1112.9	1	0.849333
JW3149	ECK3171	b3182	dacB	2	9	4	D	7	G		0.432	33858.1	2655394200	0.293	49435	168720		0.708	48220.5	2559456000	0.393	50761	129163		0.805	58357.6	1980927900	0.488	43508	89155.7		46812.1	7107.38	2398592700	2.10661e+08	0.391333	0.0562978	47901.3	2229.77		0.648333	0.111732	129013	22968.4	1	0.648333
JW2725	ECK2750	b2755	ygbT	2	11	5	D	10	G		0.553	48147.3	472154400	0.386	8685	22500		0.729	58001.7	443467800	0.439	9287	21154.9		0.949	63319.1	403221600	0.515	9270	18000		56489.3	4444.5	439614600	1.99922e+07	0.446667	0.0374359	9080.67	197.894		0.743667	0.11455	20551.6	1333.6	1	0.743667
JW3412	ECK3431	b3447	ggt	2	9	6	D	11	G		0.455	36403.7	2083852800	0.316	36996	117076		0.75	48923.6	2208052800	0.411	40146	97678.8		0.859	57188.8	2047642200	0.502	41625	82918.3		47505.3	6041.91	2113182600	4.85732e+07	0.409667	0.0536977	39589	1364.99		0.688	0.120674	99224.4	9890.69	1	0.688
JW1567	ECK1570	b1576	ydfD	2	11	6	D	12	G		0.61	56103.3	287834400	0.456	4928	10807		1.001	76030	316530000	0.574	5871	10228.2		1.11	76885.6	272164500	0.61	5580	9147.54		69673	6789.32	292176300	1.29899e+07	0.546667	0.0465093	5459.67	278.79		0.907	0.151797	10060.9	486.298	1	0.907
JW1631	ECK1635	b1639	ydhA	2	11	7	D	14	G		0.582	55586.6	298377000	0.471	5316	11286.6		0.75	62890.8	385452900	0.483	7709	15960.7		0.974	70699.5	321768900	0.53	7077	13352.8		63059	4363.53	335199600	2.60182e+07	0.494667	0.0180031	6700.67	715.968		0.768667	0.113545	13533.4	1352.29	1	0.768667
JW2221	ECK2220	b2227	yfaS	2	9	8	D	15	G		0.446	37260.8	1696298400	0.324	31090	95956.8		0.843	53572.4	1835100900	0.462	37509	81188.3		0.982	61125.8	1523093400	0.543	31606	58206.3		50653	7042.16	1684830900	9.02511e+07	0.443	0.0639296	33401.7	2059.06		0.757	0.160594	78450.5	10983.3	1	0.757
JW1695	ECK1703	b1705	ydiE	2	11	8	D	16	G		0.508	35606.2	1527162300	0.338	25097	74251.5		1.052	74568.2	237321900	0.547	4646	8493.6		1.12	71095.6	220023900	0.558	4508	8078.85		60423.3	12449	661502700	4.32859e+08	0.481	0.0715705	11417	6840.12		0.893333	0.193664	30274.6	21988.7	1	0.893333
JW1766	ECK1775	b1777	yeaC	2	11	9	D	18	G		0.527	47038.8	1081674900	0.395	20044	50744.3		0.948	70659.7	338561100	0.546	7062	12934.1		0.944	67046.7	296893800	0.517	6504	12580.3		61581.7	7345.9	572376600	2.54933e+08	0.486	0.0462637	11203.3	4423.27		0.806333	0.139671	25419.5	12662.8	1	0.806333
JW2302	ECK2299	b2305	yfcI	2	9	10	D	19	G		0.548	40435.6	2060613900	0.35	39587	113106		0.793	50721.4	1934964900	0.447	43032	96268.5		0.864	57308.6	1542927600	0.498	33502	67273.1		49488.5	4909.67	1846168800	1.55899e+08	0.431667	0.0434063	38707	2786.04		0.735	0.0957201	92215.8	13385	1	0.735
JW2358	ECK2355	b2361	yfdR	2	9	11	D	21	G		0.658	46328.8	765514800	0.426	14170	33262.9		0.933	56978.3	841001400	0.484	16718	34541.3		0.883	57128.1	938930400	0.478	21364	44694.6		53478.4	3575.05	848482200	5.02003e+07	0.462667	0.018415	17417.3	2105.96		0.824667	0.0845741	37499.6	3616.36	1	0.824667
JW1857	ECK1869	b1868	yecE	2	11	11	D	22	G		0.787	49186.6	477329400	0.445	9071	20384.3		1.079	70802	570651300	0.549	11556	21049.2		1.238	73658.7	508158900	0.577	11753	20369.2		64549.1	7725.39	518713200	2.74517e+07	0.523667	0.0401553	10793.3	863.042		1.03467	0.132066	20600.9	224.199	0.946387	0.979195
JW2426	ECK2428	b2433	yfeZ	2	9	12	D	23	G		0.635	45731.5	1910343600	0.416	37476	90086.5		1.08	60949.4	1934730000	0.559	42733	76445.4		1.061	61397.2	1662901200	0.563	35641	63305.5		56026	5148.89	1835991600	8.6831e+07	0.512667	0.0483471	38616.7	2125.24		0.925333	0.14527	76612.5	7731.47	0.861677	0.797338
JW1914	ECK1928	b1929	yedE	2	11	12	D	24	G		0.842	43446	2691704700	0.425	58720	138165		1.228	53650.3	2597061600	0.508	75208	148047		0.872	46648.1	1977901200	0.437	48065	109989		47914.8	3013.04	2422222500	2.23834e+08	0.456667	0.0258994	60664.3	7895.59		0.980667	0.12397	132067	11401.8	0.740584	0.726266
JW0242	ECK0254	b0252	yafZ	2	15	2	D	4	H		0.715	50757.4	438320700	0.434	7351	16937.8		1.155	69423	547463700	0.549	10112	18418.9		1.028	74326.5	485987400	0.597	10885	18232.8		64835.6	7180.04	490590600	3.15908e+07	0.526667	0.0483609	9449.33	1072.63		0.966	0.130745	17863.2	465.808	1	0.966
JW0286	ECK0291	b0292	yagY	2	15	3	D	6	H		0.502	34568.5	2673423900	0.318	48966	153981		0.718	44545.8	2868423300	0.38	51187	134703		0.803	60895.2	2451218400	0.512	52986	103488		46669.8	7673.71	2664355200	1.20522e+08	0.403333	0.0572053	51046.3	1162.6		0.674333	0.0895923	130724	14711.2	1	0.674333
JW0366	ECK0370	b0375	yaiV	2	15	4	D	8	H		0.401	32767	2627833500	0.288	46925	162934		0.782	45998.5	2205122400	0.396	46328	116990		0.779	45324.4	1917711900	0.402	45674	113617		41363.3	4302.55	2250222600	2.06231e+08	0.362	0.0370405	46309	361.258		0.654	0.126503	131180	15906.7	1	0.654
JW1054	ECK1052	b1067	yceH	2	13	5	D	9	H		0.483	35219.6	2399998500	0.313	43444	138799		0.736	44550.2	2359712700	0.388	46189	119044		0.833	52908	1735693200	0.469	36961	78808.1		44225.9	5108.78	2165134800	2.15036e+08	0.39	0.0450444	42198	2735.77		0.684	0.104328	112217	17651	1	0.684
JW1134	ECK1134	b1148	ymfM	2	13	6	D	11	H		0.522	38603.3	4219492500	0.324	88598	273451		0.762	50211	3645704700	0.43	78606	182805		0.777	55002.4	2843981100	0.47	65209	138743		47938.9	4868.41	3569726100	3.98889e+08	0.408	0.0435584	77471	6775.63		0.687	0.0826136	198333	39654.4	1	0.687
JW0509	ECK0513	b0520	ylbF	2	15	6	D	12	H		0.544	42065.2	1710051300	0.356	31818	89376.4		0.813	53461.4	1600308900	0.464	32972	71060.3		0.833	59235	1425138300	0.506	29794	58881.4		51587.2	5044.32	1578499500	8.2967e+07	0.442	0.0446766	31528	928.798		0.73	0.093179	73106.1	8862.37	1	0.73
JW1196	ECK1193	b1205	ychH	2	13	7	D	13	H		0.422	36976.8	2141955900	0.318	39501	124217		0.684	50255.9	2107642500	0.42	39507	94064.3		0.831	57559.8	1970759700	0.49	39194	79987.8		48264.1	6024.68	2073452700	5.22932e+07	0.409333	0.0499377	39400.7	103.348		0.645667	0.119614	99423	13046	1	0.645667
JW1265	ECK1267	b1273	yciN	2	13	8	D	15	H		0.588	46722.3	1133044200	0.408	19774	48465.7		0.814	55152.6	1236663000	0.478	23178	48489.5		0.779	58835.4	1139258700	0.501	20807	41530.9		53570.1	3585.16	1169655300	3.35518e+07	0.462333	0.0279662	21253	1007.64		0.727	0.0702306	46162.1	2315.57	1	0.727
JW0643	ECK0641	b0648	ybeU	2	15	8	D	16	H		0.432	36281.6	1690953300	0.319	28627	89739.8		0.704	47531.6	1607184000	0.412	30784	74718.4		0.829	56004.8	1518345900	0.501	29543	58968.1		46606	5712.36	1605494400	4.98346e+07	0.410667	0.0525431	29651.3	625.024		0.655	0.117194	74475.4	8883.87	1	0.655
JW1334	ECK1337	b1340	ydaL	2	13	9	D	17	H		0.522	44070.2	1369925100	0.366	25182	68803.3		0.906	58766.8	1430567100	0.489	28086	57435.6		1.013	67635	1252265400	0.581	25057	43127.4		56824	6871.57	1350919200	5.23412e+07	0.478667	0.0622798	26108.3	989.492		0.813667	0.149069	56455.4	7428.18	1	0.813667
JW1360	ECK1364	b1366	ydaY	2	13	10	D	19	H		0.725	62518.2	265584600	0.505	4689	9285.15		0.952	72411.4	253820700	0.547	5153	9420.48		1.133	74076	223534800	0.577	4651	8060.66		69668.6	3607.31	247646700	1.25251e+07	0.543	0.0208806	4831	161.373		0.936667	0.118029	8922.09	432.486	1	0.936667
JW0924	ECK0932	b0941	ycbT	2	15	11	D	22	H		0.688	45954	2933791200	0.41	61589	150217		0.93	55091.6	2699377200	0.464	65116	140336		0.948	58739.4	2115512100	0.501	50372	100543		53261.7	3802.55	2582893500	2.43291e+08	0.458333	0.0264218	59025.7	4445.01		0.855333	0.0838279	130365	15181.6	0.946387	0.809476
JW1441	ECK1440	b1446	ydcY	2	13	12	D	23	H		0.87	56330.2	1547317800	0.483	28644	59304.3		1.164	62530.8	1634611500	0.57	36497	64029.8		0.952	62242.4	1293760800	0.546	26954	49366.3		60367.8	2020.52	1491896700	1.02223e+08	0.533	0.0259422	30698.3	2940.09		0.995333	0.0875925	57566.8	4321.23	0.861677	0.857656
JW1044	ECK1042	b1057	yceJ	2	15	12	D	24	H		0.818	49502	2326096800	0.434	53662	123645		1.386	61084.3	2224270800	0.578	66836	115633		0.94	58162.1	2037423600	0.522	51354	98379.3		56249.5	3477.6	2195930400	8.4529e+07	0.511333	0.04191	57284	4822.25		1.048	0.172631	112553	7454.5	0.740584	0.776132
JW1834	ECK1846	b1845	ptrB	2	9	1	E	1	I		0.73	46903.9	1973248200	0.407	40870	100418		1.232	62104.8	2010051900	0.585	51485	88008.5		1.249	66650.4	1353089700	0.595	35905	60344.5		58553	5970.56	1778796600	2.13118e+08	0.529	0.0610683	42753.3	4595.08		1.07033	0.170237	82923.6	11844.2	0.740584	0.792672
JW2507	ECK2520	b2523	pepB	2	9	2	E	3	I		0.406	35547.6	2501150400	0.311	45402	145987		0.694	48231.6	2231171100	0.413	42700	103390		0.729	52666.3	1688771700	0.451	33549	74388		45481.8	5129.45	2140364400	2.38868e+08	0.391667	0.0417985	40550.3	3586.51		0.609667	0.102333	107922	20792.7	0.946387	0.576981
JW2584	ECK2600	b2603	yfiR	2	11	2	E	4	I		0.559	40737.3	4399328700	0.346	101115	292240		0.839	55263.7	3491758800	0.443	79200	178781		0.878	56716.1	2298042000	0.454	55091	121346		50905.7	5101.45	3396376500	6.08461e+08	0.414333	0.0343139	78468.7	13291		0.758667	0.100466	197456	50208.7	1	0.758667
JW2903	ECK2931	b2936	yggG	2	9	3	E	5	I		0.498	40622.3	1969495200	0.352	33430	94971.6		0.77	52223.8	2011315500	0.439	33792	76974.9		0.872	56851.1	1668941100	0.494	34650	70141.7		49899.1	4826.9	1883250600	1.07833e+08	0.428333	0.0413374	33957.3	361.756		0.713333	0.11162	80696.1	7405.31	1	0.713333
JW3203	ECK3223	b3234	degQ	2	9	4	E	7	I		0.486	38117.6	1950778800	0.335	32147	95961.2		0.694	46823.1	2031321600	0.395	34055	86215.2		0.925	61620.9	1667416500	0.539	34506	64018.6		48853.9	6860.38	1883172300	1.10355e+08	0.423	0.060531	33569.3	722.986		0.701667	0.126786	82065	9451.65	1	0.701667
JW2645	ECK2664	b2670	ygaW	2	11	4	E	8	I		0.459	38107.3	2792895300	0.337	49001	145404		0.584	40464	3030667200	0.341	57532	168716		0.712	50739.8	2710621800	0.442	56130	126991		43103.7	3878.19	2844728100	9.59553e+07	0.373333	0.0343527	54221	2641.19		0.585	0.0730365	147037	12072.5	1	0.585
JW5595	ECK3788	b3795	yifK	2	9	5	E	9	I		0.575	49172.6	1601960400	0.422	27687	65609		0.782	59675.2	1700262900	0.484	29962	61905		0.875	66828.2	1367972100	0.558	27218	48777.8		58558.7	5127.23	1556731800	9.85537e+07	0.488	0.0393107	28289	847.386		0.744	0.0886623	58763.9	5106.28	1	0.744
JW2726	ECK2751	b2756	ygcH	2	11	5	E	10	I		0.395	38632.3	2893183200	0.33	49775	150833		0.511	45981	3240230400	0.362	59087	163224		0.625	53806.6	2979735300	0.438	58385	133299		46140	4381.16	3037716300	1.04294e+08	0.376667	0.0320278	55749	2993.87		0.510333	0.0663961	149119	8680.94	1	0.510333
JW3359	ECK3383	b3396	mrcA	2	9	6	E	11	I		0.454	39195.9	1589303700	0.332	27763	83623.5		0.722	48505.9	1652401800	0.403	31307	77684.9		0.743	56011.1	1382495400	0.473	27554	58253.7		47904.3	4863.45	1541400300	8.15136e+07	0.402667	0.0407035	28874.7	1217.66		0.639667	0.0930311	73187.4	7661.1	1	0.639667
JW1575	ECK1578	b1583	ynfB	2	11	6	E	12	I		0.559	38749.1	1817591400	0.346	35661	103066		0.877	53326.7	1882699200	0.46	40455	87945.7		0.898	56684.7	1781528400	0.507	41042	80950.7		49586.8	5504.91	1827273000	2.9604e+07	0.437667	0.0477993	39052.7	1704.28		0.778	0.109668	90654.3	6526.34	1	0.778
JW4291	ECK4319	b4328	iadA	2	9	7	E	13	I		0.5	41212.3	1873007100	0.354	33247	93918.1		0.93	56774.9	1890222300	0.487	40369	82893.2		0.825	54406.3	1784604600	0.483	36973	76548.7		50797.9	4841.28	1849278000	3.27163e+07	0.441333	0.0436819	36863	2056.68		0.751667	0.129433	84453.3	5074.43	1	0.751667
JW1637	ECK1641	b1645	ydhK	2	11	7	E	14	I		0.744	61334.7	1091039400	0.518	19930	38474.9		1.11	73400.1	1143448200	0.621	24624	39652.2		1.051	74855.7	1239678000	0.626	28557	45618.2		69863.5	4285.05	1158055200	4.35254e+07	0.588333	0.0351963	24370.3	2493.63		0.968333	0.113452	41248.4	2211.16	1	0.968333
JW2222	ECK2220	b2228	yfaS	2	9	8	E	15	I		0.474	38028.7	1777866300	0.338	35037	103660		0.771	54379.3	1899851400	0.463	37284	80527		0.751	53576.7	1621364400	0.466	32029	68731.8		48661.6	5321.48	1766360700	8.05978e+07	0.422333	0.0421756	34783.3	1522.28		0.665333	0.0958407	84306.2	10258.4	1	0.665333
JW1697	ECK1705	b1707	ydiV	2	11	8	E	16	I		0.496	39663.4	1845315000	0.34	33709	99144.1		0.835	51111.6	1895740200	0.445	41525	93314.6		0.832	54266	1558212300	0.489	34613	70783.2		48347	4436.26	1766422500	1.05118e+08	0.424667	0.0441978	36615.7	2468.5		0.721	0.112503	87747.3	8647.37	1	0.721
JW2250	ECK2249	b2256	yfbH	2	9	9	E	17	I		0.467	38013.9	2164878900	0.329	40765	123906		0.891	53999	2066067000	0.472	46440	98389.8		0.918	57465.4	1670218200	0.513	36293	70746.6		49826.1	5990.25	1967054700	1.51134e+08	0.438	0.0557704	41166	2936.04		0.758667	0.146041	97680.7	15349.8	1	0.758667
JW1776	ECK1785	b1787	yeaK	2	11	9	E	18	I		0.59	47364.8	324385200	0.377	6040	16021.2		1.079	65285.1	279246600	0.506	5849	11559.3		1.054	65168.5	217587600	0.539	4701	8721.71		59272.8	5954.08	273739800	3.09525e+07	0.474	0.0494267	5530	418.151		0.907667	0.158997	12100.7	2124.51	1	0.907667
JW2322	ECK2319	b2325	yfcL	2	9	10	E	19	I		0.495	41331.2	1320509700	0.347	22916	66040.3		0.869	56640.7	1404067500	0.476	28420	59705.9		0.84	56687	1140358500	0.5	22529	45058		51553	5110.92	1288311900	7.78099e+07	0.441	0.0475079	24621.7	1902.45		0.734667	0.120125	56934.7	6213.54	1	0.734667
JW2432	ECK2434	b2439	eutL	2	9	12	E	23	I		0.639	52106.5	1692978300	0.413	34350	83171.9		0.799	54004.3	1547783100	0.444	38163	85952.7		0.835	55608.7	1223456400	0.467	28685	61424		53906.5	1012.17	1488072600	1.38788e+08	0.441333	0.0156454	33732.7	2753.42		0.757667	0.0602366	76849.5	7754.44	0.861677	0.652864
JW1516	ECK1516	b1523	yneG	2	15	1	E	2	J		0.591	41023.6	2063455200	0.363	36311	100030		0.888	50363.3	1974148200	0.5	39834	79668		0.934	61746	1247806800	0.544	26235	48226.1		51044.3	5991.73	1761803400	2.58288e+08	0.469	0.0545008	34126.7	4074.79		0.804333	0.10749	75974.8	15068.2	0.861677	0.693076
JW2108	ECK2112	b2120	yehM	2	13	2	E	3	J		0.485	35868	2657633400	0.327	45819	140119		0.862	47441.3	2206790100	0.447	42786	95718.1		0.879	56422.8	1581599700	0.507	32998	65084.8		46577.4	5949.37	2148674400	3.1198e+08	0.427	0.052915	40534.3	3868.55		0.742	0.128594	100307	21781.8	0.946387	0.702219
JW0259	ECK0267	b0266	yagB	2	15	2	E	4	J		0.549	45846.3	1223374500	0.385	20517	53290.9		0.78	53383.7	1326622500	0.471	23700	50318.5		0.875	61469.7	1123590600	0.512	23726	46339.8		53566.6	4511.03	1224529200	5.86131e+07	0.456	0.037421	22647.7	1065.36		0.734667	0.0967993	49983.1	2013.6	1	0.734667
JW5970	ECK0957	b0966	yccV	2	13	3	E	5	J		0.462	40953.5	1478493900	0.347	24325	70100.9		0.68	51563.6	1704374100	0.445	25981	58384.3		0.844	63104.3	1296879300	0.557	23606	42380.6		51873.8	6396.27	1493249100	1.17865e+08	0.449667	0.0606667	24637.3	703.164		0.662	0.110641	56955.2	8033.98	1	0.662
JW0287	ECK0292	b0293	yagZ	2	15	3	E	6	J		0.427	36988.5	2089878300	0.32	34370	107406		0.734	47743.7	2319228900	0.409	38370	93814.2		0.865	59438.2	1857950100	0.507	40304	79495.1		48056.8	6482.56	2089019100	1.3316e+08	0.412	0.0540031	37681.3	1747.26		0.675333	0.129798	93571.8	8058.18	1	0.675333
JW1006	ECK1011	b1021	ycdP	2	13	4	E	7	J		0.442	42882.6	3352602600	0.375	53037	141432		0.52	49909.1	3213499500	0.429	51280	119534		0.736	61041.1	2527357500	0.518	47915	92500		51277.6	5286.37	3031153200	2.55078e+08	0.440667	0.0416907	50744	1502.69		0.566	0.0879318	117822	14151.4	1	0.566
JW0369	ECK0373	b0378	yaiW	2	15	4	E	8	J		0.655	46344.2	1451577600	0.391	25400	64961.6		0.858	54496.1	1637132400	0.467	32300	69164.9		0.963	66565	1218529800	0.533	27133	50906.2		55801.7	5873.65	1435746600	1.21099e+08	0.463667	0.0410257	28277.7	2072.45		0.825333	0.0903997	61677.6	5520.68	1	0.825333
JW1090	ECK1090	b1104	ycfL	2	13	5	E	9	J		0.504	39469.6	2210568300	0.339	37232	109829		0.618	43119.7	2397292200	0.374	42181	112783		0.841	55820.8	1560436200	0.483	32343	66962.7		46136.7	4955.37	2056098900	2.53625e+08	0.398667	0.0433602	37252	2840		0.654333	0.0989652	96525	14805.7	1	0.654333
JW0455	ECK0460	b0466	ybaM	2	15	5	E	10	J		0.41	32487.4	2316139200	0.305	38086	124872		0.69	46155.7	1638740700	0.394	32800	83248.7		0.855	47819.7	1503963000	0.428	37471	87549.1		42154.3	4857.25	1819614300	2.51293e+08	0.375667	0.0366712	36119	1668.97		0.651667	0.129882	98556.6	13216.2	1	0.651667
JW1136	ECK1136	b1150	ymfR	2	13	6	E	11	J		0.509	42841.3	1471211100	0.366	26627	72751.4		0.778	52534.6	1676039400	0.447	30679	68633.1		0.969	61206.6	1512037800	0.541	32326	59752.3		52194.2	5304.34	1553096100	6.25913e+07	0.451333	0.0505646	29877.3	1693.29		0.752	0.133425	67045.6	3835.54	1	0.752
JW0516	ECK0520	b0527	ybcI	2	15	6	E	12	J		0.517	41817.1	1667215800	0.363	30078	82859.5		0.869	57275.2	1724704200	0.506	33495	66195.7		0.978	60944.1	1569531600	0.546	32600	59707		53345.5	5860.7	1653817200	4.52927e+07	0.471667	0.0555468	32057.7	1023		0.788	0.139105	69587.4	6895.36	1	0.788
JW1204	ECK1201	b1213	ychQ	2	13	7	E	13	J		0.374	33388.7	2095364700	0.308	34238	111162		0.827	51425.7	1790054100	0.448	36820	82187.5		0.81	50101.8	1845186300	0.443	44829	101194		44972.1	5804.28	1910201700	9.39395e+07	0.399667	0.0458561	38629	3188.35		0.670333	0.148248	98181.3	8498.88	1	0.670333
JW0569	ECK0572	b0580	ybdJ	2	15	7	E	14	J		1.045	48656.2	1357903800	0.507	35753	70518.7		0.825	51630.8	1807787700	0.456	37878	83065.8		0.822	47769.6	1766627100	0.432	42171	97618.1		49352.2	1167.68	1644106200	1.43594e+08	0.465	0.0221133	38600.7	1887.62		0.897333	0.0738384	83734.2	7830.03	1	0.897333
JW0667	ECK0669	b0681	ybfM	2	15	8	E	16	J		0.541	42974.8	2301729300	0.37	43627	117911		0.899	58474.9	1697848200	0.518	36056	69606.2		0.889	60880.7	1527485400	0.531	32098	60448.2		54110.1	5610.8	1842354300	2.34894e+08	0.473	0.0516366	37260.3	3382.17		0.776333	0.117702	82655.1	17825	1	0.776333
JW1341	ECK1344	b1347	ydaC	2	13	9	E	17	J		0.49	39023.2	2265658200	0.34	42373	124626		0.828	51630.4	1954998900	0.464	45308	97646.6		0.874	54272.1	1575656100	0.491	35285	71863.5		48308.5	4704.89	1932104400	1.99515e+08	0.431667	0.0464913	40988.7	2975.03		0.730667	0.121064	98045.5	15232.7	1	0.730667
JW0725	ECK0724	b0735	ybgE	2	15	9	E	18	J		0.496	38625.1	1768629600	0.334	31681	94853.3		0.789	48805.8	1662870600	0.434	34707	79970		0.892	53252.9	1359276300	0.48	28653	59693.8		46894.6	4329.46	1596925500	1.22684e+08	0.416	0.0430968	31680.3	1747.64		0.725667	0.11862	78172.4	10189.4	1	0.725667
JW1367	ECK1368	b1373	tfaR	2	13	10	E	19	J		0.606	47655.2	1560945600	0.394	27320	69340.1		0.894	58754.6	1539477900	0.514	30311	58970.8		0.966	62290.9	1384148700	0.561	27202	48488.4		56233.6	4409	1494857400	5.57002e+07	0.489667	0.0497203	28277.7	1017.24		0.822	0.109982	58933.1	6019.39	1	0.822
JW0805	ECK0811	b0821	ybiU	2	15	10	E	20	J		0.524	39567.8	1722061800	0.341	30629	89821.1		0.873	52707.4	1741321800	0.467	34618	74128.5		0.916	51568.7	1628651700	0.471	34774	73830.1		47948	4202.96	1697345100	3.47938e+07	0.426333	0.0426823	33340.3	1356.41		0.771	0.124122	79259.9	5281.3	1	0.771
JW0925	ECK0933	b0942	ycbU	2	15	11	E	22	J		0.676	49324.9	815149800	0.439	16347	37236.9		0.883	54764.7	820135800	0.482	18235	37832		1.052	58242.5	638806500	0.533	14396	27009.4		54110.7	2594.99	758030700	5.96295e+07	0.484667	0.0271682	16326	1108.27		0.870333	0.108726	34026.1	3512.55	0.946387	0.823672
JW1442	ECK1441	b1447	ydcZ	2	13	12	E	23	J		0.658	45505.5	1810695600	0.404	35762	88519.8		0.926	52655	2012647500	0.49	47202	96330.6		0.999	61327.3	1505016000	0.563	33557	59603.9		53162.6	4574.39	1776119700	1.47557e+08	0.485667	0.0459505	38840.3	4229.01		0.861	0.103665	81484.8	11170.4	0.861677	0.741904
JW1074	ECK1074	b1088	yceD	2	15	12	E	24	J		0.785	40955	2444699700	0.405	53426	131916		1.439	66525.3	2430204300	0.635	74478	117288		0.896	58829.7	2132262900	0.531	54988	103556		55436.7	7573.94	2335722300	1.01816e+08	0.523667	0.0664964	60964	6772.03		1.04	0.202057	117587	8188.33	0.740584	0.770207
JW2504	ECK2516	b2520	yfhM	2	11	1	F	2	K		0.583	46243.4	1327122000	0.392	23191	59160.7		0.924	58213.8	1399237200	0.517	29292	56657.6		0.985	65238.8	897705900	0.566	18988	33547.7		56565.3	5545.07	1208021700	1.56548e+08	0.491667	0.051802	23823.7	2991.28		0.830667	0.125079	49788.7	8152.58	0.861677	0.715766
JW2669	ECK2694	b2699	recA	2	9	2	F	3	K		0.553	44041.4	848157300	0.389	15582	40056.6		0.787	49315.9	1004770800	0.436	20666	47399.1		0.921	56183.2	557358300	0.496	11437	23058.5		49846.9	3515.08	803428800	1.31079e+08	0.440333	0.0309641	15895	2668.78		0.753667	0.107532	36838	7208.46	0.946387	0.71326
JW2600	ECK2615	b2619	yfjG	2	11	2	F	4	K		0.474	40849.2	2217150000	0.344	36243	105358		0.704	47625	2048809500	0.402	34629	86141.8		0.793	59194.3	1608980400	0.497	30470	61307.8		49222.9	5355.71	1958313300	1.81301e+08	0.414333	0.0445957	33780.7	1719.65		0.657	0.0950386	84269.1	12750.5	1	0.657
JW2911	ECK2939	b2944	sprT	2	9	3	F	5	K		0.435	36856.3	2165886000	0.318	35565	111840		0.672	45768.8	2182100400	0.391	35325	90345.3		0.871	58216.1	1595061900	0.51	31951	62649		46947.1	6194.1	1981016100	1.93034e+08	0.406333	0.0559534	34280.3	1166.73		0.659333	0.126022	88278	14237.7	1	0.659333
JW2614	ECK2629	b2633	yfjQ	2	11	3	F	6	K		0.431	34699.6	3211982100	0.303	51344	169452		0.55	40525.3	3057780600	0.344	50788	147640		0.779	53477.2	2256875100	0.465	45765	98419.4		42900.7	5549.22	2842212600	2.96035e+08	0.370667	0.048629	49299	1774.27		0.586667	0.102118	138504	21008	1	0.586667
JW2646	ECK2665	b2671	ygaC	2	11	4	F	8	K		0.523	54857.3	528508800	0.447	8562	19154.4		0.625	62197	564898500	0.484	9401	19423.6		0.948	72519.8	512454600	0.545	10342	18976.1		63191.4	5122.88	535287300	1.5514e+07	0.492	0.0285715	9435	514.123		0.698667	0.128097	19184.7	130.042	1	0.698667
JW3670	ECK3686	b3693	dgoK	2	9	5	F	9	K		0.501	43094.2	1496624400	0.371	26372	71083.6		0.617	45719.6	1646362800	0.378	28563	75563.5		0.875	59126.8	1306197900	0.51	26047	51072.5		49313.5	4964.83	1483061700	9.8431e+07	0.419667	0.0452118	26994	790.09		0.664333	0.110528	65906.5	7528.89	1	0.664333
JW3297	ECK3322	b3335	gspO	2	9	6	F	11	K		0.506	39718	2334308400	0.349	41640	119312		0.678	44220.8	2410454700	0.378	45557	120521		0.876	56509.6	1779669900	0.506	37054	73229.2		46816.1	5018	2174811000	1.9879e+08	0.411	0.0482321	41417	2457.14		0.686667	0.106898	104354	15566.4	1	0.686667
JW4352	ECK4381	b4389	radA	2	9	7	F	13	K		0.492	42807.1	2027578500	0.367	37363	101807		0.711	51194.2	2023732800	0.44	43074	97895.5		0.774	57982.1	1553538600	0.506	33419	66045.5		50661.1	4388.77	1868283300	1.57376e+08	0.437667	0.0401428	37952	2802.67		0.659	0.0854576	88582.5	11324.9	1	0.659
JW2223	ECK2221	b2229	yfaT	2	9	8	F	15	K		0.558	47279.7	1389177000	0.395	24634	62364.6		0.899	59331.5	1526999400	0.507	30389	59938.9		0.878	63427.1	1336113900	0.541	25985	48031.4		56679.4	4846.31	1417430100	5.68858e+07	0.481	0.0441059	27002.7	1737.5		0.778333	0.110333	56778.3	4429.13	1	0.778333
JW1711	ECK1720	b1722	ydiY	2	11	8	F	16	K		0.4	37126.3	1589842800	0.305	27813	91190.2		0.763	51382	1656759600	0.445	32409	72829.2		0.847	57153.9	1417594500	0.501	28141	56169.7		48554	5951.87	1554732300	7.1238e+07	0.417	0.0582866	29454.3	1480.36		0.67	0.13716	73396.3	10113.5	1	0.67
JW2252	ECK2251	b4544	yfbW	2	9	9	F	17	K		0.521	42057.3	1753652700	0.359	31726	88373.3		0.797	52250.8	1757362500	0.45	37678	83728.9		0.868	58421.9	1379506500	0.511	29461	57653.6		50910	4771.39	1630173900	1.25338e+08	0.44	0.0441626	32955	2450.35		0.728667	0.105837	76585.3	9560.29	1	0.728667
JW1782	ECK1791	b1793	yoaF	2	11	9	F	18	K		0.659	60380	435631500	0.482	7890	16369.3		1.005	75489.9	391296600	0.58	8446	14562.1		0.977	71176.9	334140300	0.545	7520	13798.2		69015.6	4493.73	387022800	2.93758e+07	0.535667	0.0286725	7952	269.105		0.880333	0.110961	14909.8	762.318	1	0.880333
JW2330	ECK2327	b2333	yfcP	2	9	10	F	19	K		0.554	44056.2	1757955600	0.375	32706	87216		0.832	53112.8	1752801300	0.465	38091	81916.1		0.896	57440.4	1255226400	0.502	27482	54745		51536.5	3943.27	1588661100	1.66724e+08	0.447333	0.0377109	32759.7	3062.67		0.760667	0.104972	74625.7	10057.4	1	0.760667
JW1828	ECK1840	b1839	yebY	2	11	10	F	20	K		0.686	49245.6	1280916000	0.42	24652	58695.2		0.876	57356.6	1520879400	0.468	33935	72510.7		0.962	56700.4	1196871300	0.506	28798	56913		54434.2	2601.21	1332888900	9.70759e+07	0.464667	0.0248819	29128.3	2684.86		0.841333	0.081538	62706.3	4929.1	1	0.841333
JW2372	ECK2371	b2375	yfdX	2	9	11	F	21	K		0.651	37033.2	2227506300	0.369	35195	95379.4		0.907	49602.7	2493032400	0.454	44912	98925.1		0.899	53003	2209582800	0.481	45378	94341		46546.3	4856.77	2310040500	9.16421e+07	0.434667	0.0337458	41828.3	3319.39		0.819	0.0840317	96215.2	1387.74	1	0.819
JW2435	ECK2446	b2451	eutA	2	9	12	F	23	K		0.869	52115.1	1836216000	0.481	41601	86488.6		0.807	52107.8	2001399300	0.461	46626	101141		0.861	58603.6	1354320000	0.51	30890	60568.6		54275.5	2164.04	1730645100	1.94111e+08	0.484	0.0142244	39705.7	4640.39		0.845667	0.0194708	82732.7	11861.8	0.861677	0.728692
JW1940	ECK1955	b1957	yodC	2	11	12	F	24	K		1.224	59773.7	1112404500	0.556	28311	50919.1		1.87	81601.6	1158311700	0.701	33383	47622		1.374	70520.7	1017518400	0.627	27223	43417.9		70632	6301.41	1096078200	4.14552e+07	0.628	0.0418609	29639	1898.16		1.48933	0.195197	47319.6	2170.68	0.740584	1.10298
JW1520	ECK1520	b1527	yneK	2	15	1	F	2	L		0.716	50334.8	307133100	0.418	5665	13552.6		1.04	59233.3	336219300	0.504	5275	10466.3		1.142	68962.9	232748100	0.578	5118	8854.67		59510.3	5379.26	292033500	3.08089e+07	0.5	0.0462313	5352.67	162.61		0.966	0.128421	10957.9	1378.28	0.861677	0.83238
JW0270	ECK0275	b0276	yagJ	2	15	2	F	4	L		0.614	43164.2	1833709500	0.375	29415	78440		0.91	56379.7	2040798600	0.494	37270	75445.3		0.96	60352	1596589200	0.53	33448	63109.4		53298.6	5195.36	1823699100	1.2833e+08	0.466333	0.0468342	33377.7	2267.82		0.828	0.107969	72331.6	4691.42	1	0.828
JW0968	ECK0976	b0985	ymcB	2	13	3	F	5	L		0.601	48244.9	2052693000	0.415	34608	83392.8		0.786	55229.3	2280531600	0.469	36902	78682.3		0.848	63284.6	1684368000	0.552	32099	58150.4		55586.3	4345.23	2005864200	1.73683e+08	0.478667	0.0398427	34536.3	1386.97		0.745	0.0741912	73408.5	7749.29	1	0.745
JW0311	ECK0317	b0319	yahE	2	15	3	F	6	L		0.503	41469.8	2229641100	0.356	34211	96098.3		0.612	45425	2115915300	0.392	32665	83329.1		0.786	58775.8	1574667900	0.517	28503	55131.5		48556.9	5235.51	1973408100	2.02055e+08	0.421667	0.0487864	31793	1704.47		0.633667	0.0824102	78186.3	12102.4	1	0.633667
JW0370	ECK0374	b0379	yaiY	2	15	4	F	8	L		0.61	39766.9	2980565100	0.366	53146	145208		0.644	43981.3	3335774400	0.387	60877	157305		0.764	49763.3	2776970700	0.447	56614	126653		44503.8	2897.54	3031103400	1.6328e+08	0.4	0.0242693	56879	2235.68		0.672667	0.0467095	143055	8913.58	1	0.672667
JW0457	ECK0462	b0468	ybaN	2	15	5	F	10	L		0.487	34078.9	2665257300	0.315	46156	146527		0.773	46447.3	1219009500	0.411	25387	61768.9		0.695	44118.1	2504734200	0.404	53526	132490		41548.1	3794.66	2129667000	4.57681e+08	0.376667	0.0308995	41689.7	8424.41		0.651667	0.0853568	113595	26228.1	1	0.651667
JW1137	ECK1137	b1151	ymfO	2	13	6	F	11	L		0.697	51173.4	290992500	0.441	5017	11376.4		0.836	54838.4	270004500	0.455	5217	11465.9		1.009	60171.1	245149200	0.517	4951	9576.4		55394.3	2612.25	268715400	1.32495e+07	0.471	0.0233524	5061.67	79.9694		0.847333	0.0902447	10806.3	615.467	1	0.847333
JW0535	ECK0538	b0547	ybcN	2	15	6	F	12	L		0.482	42751.9	1381165200	0.36	24172	67144.4		0.672	51590.6	1292898600	0.427	25731	60260		0.824	63613.9	1232170200	0.539	24061	44640.1		52652.1	6045.68	1302078000	4.32553e+07	0.442	0.0522143	24654.7	539.12		0.659333	0.0989298	57348.2	6657.59	1	0.659333
JW0591	ECK0592	b4512	ybdD	2	15	7	F	14	L		0.533	48108.4	1653648300	0.4	29466	73665		0.916	58371.8	1638638100	0.513	31027	60481.5		0.903	60932.2	1462704300	0.535	28968	54145.8		55804.1	3918.2	1584996900	6.12996e+07	0.482667	0.0418184	29820.3	620.224		0.784	0.125556	62764.1	5749.13	1	0.784
JW1288	ECK1290	b1295	ymjA	2	13	8	F	15	L		0.548	42454.3	2188036800	0.377	41333	109637		0.88	54289.8	2111229900	0.483	46736	96761.9		0.883	53486.6	1731983400	0.476	37479	78737.4		50076.9	3818.35	2010416700	1.40971e+08	0.445333	0.0342264	41849.3	2684.71		0.770333	0.11117	95045.3	8961.03	1	0.770333
JW1346	ECK1349	b4526	ydaE	2	13	9	F	17	L		0.443	34922.4	2241519300	0.309	39747	128631		0.775	47127.2	1509269400	0.404	33291	82403.5		0.779	47968.8	2414384100	0.432	56538	130875		43339.5	4215.54	2055057600	2.77419e+08	0.381667	0.0372216	43192	6928.37		0.665667	0.111339	113970	15796.5	1	0.665667
JW0736	ECK0742	b0753	ybgS	2	15	9	F	18	L		0.493	37382.4	2001702600	0.332	35920	108193		0.772	45910.5	1914713100	0.402	40859	101639		0.971	56038.9	1495377900	0.499	34887	69913.8		46444	5392.28	1803931200	1.56307e+08	0.411	0.0484183	37222	1842.79		0.745333	0.138629	93248.6	11819.8	1	0.745333
JW0827	ECK0833	b0843	ybjH	2	15	10	F	20	L		0.62	44768.5	1826148600	0.383	35026	91451.7		0.744	47011.2	2023672500	0.406	41827	103022		0.899	54210.7	1576766700	0.499	33473	67080.2		48663.5	2848.16	1808862600	1.293e+08	0.429333	0.0354605	36775.3	2565.31		0.754333	0.0807059	87184.7	10592.6	1	0.754333
JW1447	ECK1446	b1452	yncE	2	13	12	F	23	L		0.969	50690.5	1839022200	0.492	46630	94776.4		1.027	53354.2	1598338800	0.495	40567	81953.5		0.908	54315.8	1131678000	0.492	26658	54182.9		52786.8	1084.29	1523013000	2.07637e+08	0.493	0.001	37951.7	5911.86		0.968	0.034356	76971	11980.2	0.861677	0.834103
JW1114	ECK1114	b1128	ycfD	2	15	12	F	24	L		1.201	58246.1	281674800	0.522	7373	14124.5		1.89	72390.8	258767100	0.647	7772	12012.4		1.111	57832.6	233641800	0.499	5736	11495		62823.2	4785.3	258027900	1.38709e+07	0.556	0.0459819	6960.33	622.908		1.40067	0.246042	12544	804.27	0.740584	1.03731
JW2005	ECK2018	b2023	hisH	2	9	1	G	1	M		0.642	38608.8	1541362500	0.38	30200	79473.7		1.323	57838	890714700	0.584	19427	33265.4		1.282	57190.4	646747200	0.582	13129	22558.4		51212.4	6304.56	1026274800	2.67e+08	0.515333	0.0676691	20918.7	4984.09		1.08233	0.220485	45099.2	17463	0.740584	0.801559
JW2520	ECK2533	b2536	hcaT	2	11	1	G	2	M		0.69	55518.9	324885600	0.451	5439	12059.9		1.706	92108.5	260035200	0.71	4935	6950.7		1.114	71030.5	263124000	0.593	5794	9770.66		72886	10603.2	282681600	2.11208e+07	0.584667	0.0748829	5389.33	249.212		1.17	0.294627	9593.74	1477.54	0.861677	1.00816
JW2688	ECK2713	b2718	hycH	2	9	2	G	3	M		0.507	43650.6	1930993200	0.37	32770	88567.6		0.817	53937.7	1632353400	0.469	32684	69688.7		0.798	61848.4	1273366800	0.532	25582	48086.5		53145.6	5268.14	1612237800	1.90107e+08	0.457	0.0471487	30345.3	2381.8		0.707333	0.100317	68780.9	11694.7	0.946387	0.669411
JW2603	ECK2619	b2623	yfjH	2	11	2	G	4	M		0.478	41705.5	1912531500	0.362	31252	86331.5		0.696	49799.1	1980057600	0.425	35258	82960		0.772	56859.2	1484877600	0.493	28578	57967.5		49454.6	4377.9	1792488900	1.55036e+08	0.426667	0.0378256	31696	1941.09		0.648667	0.0881085	75753	8945.83	1	0.648667
JW2939	ECK2967	b2972	pppA	2	9	3	G	5	M		0.52	41423.8	2199675600	0.361	37226	103119		0.687	46356.1	2131400700	0.395	37301	94432.9		0.86	55617.7	1642583700	0.487	33717	69234.1		47799.2	4160.47	1991220000	1.75429e+08	0.414333	0.0376357	36081.3	1182.36		0.689	0.0981546	88928.7	10161.5	1	0.689
JW2623	ECK2638	b2642	yfjW	2	11	3	G	6	M		0.596	48993.2	3204935100	0.493	60986	123704		0.663	60130.2	3285828900	0.519	61206	117931		0.799	68994.9	2481358500	0.566	54776	96777.4		59372.8	5786.4	2990707500	2.55743e+08	0.526	0.021362	58989.3	2107.62		0.686	0.0597188	112804	8184.76	1	0.686
JW3930	ECK3949	b3958	argC	2	9	4	G	7	M		0.527	37985.6	1115972100	0.364	18169	49914.8		0.55	45533.3	1666328400	0.39	28770	73769.2		0.679	51792.2	1433243700	0.463	29170	63002.2		45103.7	3991.42	1405181400	1.59493e+08	0.405667	0.0296329	25369.7	3602.18		0.585333	0.0473016	62228.7	6897.02	1	0.585333
JW2647	ECK2666	b2672	ygaM	2	11	4	G	8	M		0.54	44517.3	729158400	0.371	13163	35479.8		0.694	51448.3	1036676700	0.408	19692	48264.7		0.878	54637.7	848977200	0.466	19180	41158.8		50201.1	2987.3	871604100	8.94909e+07	0.415	0.0276466	17345	2096.22		0.704	0.0977002	41634.4	3698.34	1	0.704
JW1547	ECK1549	b1555	ydfR	2	11	5	G	10	M		0.587	55619.6	462249000	0.456	7529	16511		0.64	52961.3	473848200	0.409	8269	20217.6		0.834	59787.2	474630300	0.484	9190	18987.6		56122.7	1986.45	470242500	4.00312e+06	0.449667	0.021881	8329.33	480.437		0.687	0.0750755	18572.1	1090	1	0.687
JW3981	ECK4013	b4021	pepE	2	9	6	G	11	M		0.55	46004.7	1607926500	0.4	29245	73112.5		0.728	51133	1594134900	0.435	30699	70572.4		0.848	56359.8	1268399700	0.496	26573	53574.6		51165.8	2989.31	1490153700	1.10948e+08	0.443667	0.0280496	28839	1208.25		0.708667	0.0865666	65753.2	6133.28	1	0.708667
JW1590	ECK1593	b1598	ydgD	2	11	6	G	12	M		0.637	53151.4	567079200	0.438	11005	25125.6		0.723	61709.1	516151800	0.494	11262	22797.6		0.83	63530.9	508772700	0.515	11998	23297.1		59463.8	3199.72	530667900	1.83298e+07	0.482333	0.0229807	11421.7	297.564		0.73	0.0558241	23740.1	707.596	1	0.73
JW2150	ECK2156	b2163	yeiL	2	9	7	G	13	M		0.508	39601.3	2245316400	0.36	41911	116419		0.753	50034.4	2278876500	0.443	46364	104659		0.734	55141.2	1715283000	0.49	36221	73920.4		48259	4572.99	2079825300	1.82528e+08	0.431	0.0380044	41498.7	2935.28		0.665	0.0786914	98333	12669.6	1	0.665
JW1657	ECK1663	b1667	ydhR	2	11	7	G	14	M		0.581	42857.5	2147671800	0.382	42164	110377		1.032	61949.3	1346181300	0.563	32854	58355.2		0.851	58911.8	1548503100	0.517	33215	64245.6		54572.9	5922.98	1680785400	2.40639e+08	0.487333	0.0543149	36077.7	3044.95		0.821333	0.131035	77659.3	16447	1	0.821333
JW2224	ECK2222	b2230	yfaA	2	9	8	G	15	M		0.671	46765	1978241400	0.426	41350	97065.7		0.87	57574.6	1850464800	0.498	42027	84391.6		0.847	58569.3	1746749700	0.506	38168	75430.8		54303	3779.91	1858485300	6.69461e+07	0.476667	0.0254384	40515	1189.66		0.796	0.0628517	85629.4	6276.05	1	0.796
JW1715	ECK1724	b1726	yniB	2	11	8	G	16	M		0.639	49372.9	1469019600	0.413	30837	74665.9		0.763	57450	1735427700	0.447	41551	92955.3		0.772	55890.9	1742093100	0.454	44777	98627.8		54237.9	2473.79	1648846800	8.99342e+07	0.438	0.0126623	39055	4213.21		0.724667	0.0429121	88749.6	7229.77	1	0.724667
JW1785	ECK1794	b1796	yoaG	2	11	9	G	18	M		0.814	61886.4	260162100	0.48	4779	9956.25		0.994	70817.7	293302800	0.531	5920	11148.8		1.21	68909.2	267183000	0.537	6119	11394.8		67204.4	2715.48	273549300	1.00826e+07	0.516	0.0180831	5606	417.471		1.006	0.114473	10833.3	444.224	1	1.006
JW2332	ECK2329	b2335	yfcR	2	9	10	G	19	M		0.609	43507.9	1696178700	0.376	31632	84127.7		0.775	52271.5	1707941700	0.45	36355	80788.9		0.832	54677	1364220900	0.48	30152	62816.7		50152.1	3393.91	1589447100	1.12664e+08	0.435333	0.0309049	32713	1870.45		0.738667	0.0668888	75911.1	6617.76	1	0.738667
JW1829	ECK1841	b1840	yebZ	2	11	10	G	20	M		0.807	58372.5	1029956400	0.476	21685	45556.7		0.726	54155.8	1384912800	0.414	27606	66681.2		0.908	59178.1	995384700	0.5	22080	44160		57235.4	1557.29	1136751300	1.24481e+08	0.463333	0.0256212	23790.3	1911.24		0.813667	0.0526445	52132.6	7285.43	1	0.813667
JW2387	ECK2386	b2390	ypeC	2	9	11	G	21	M		0.935	49329.6	1684870200	0.482	42848	88896.3		0.843	49506.2	2021127300	0.445	47823	107467		0.955	55723.4	1385800200	0.498	34163	68600.4		51519.8	2102.45	1697265900	1.83508e+08	0.475	0.015695	41611.3	3991.49		0.911	0.0344867	88321.4	11223.6	1	0.911
JW1891	ECK1901	b4537	yecJ	2	11	11	G	22	M		1.239	68119.8	453206700	0.552	11848	21463.8		1.098	66726.6	496587600	0.517	12331	23851.1		1.18	67312	353050200	0.564	8694	15414.9		67386.2	403.888	434281500	4.25024e+07	0.544333	0.0140989	10957.7	1140.39		1.17233	0.0408833	20243.2	2510.61	0.946387	1.10948
JW2443	ECK2454	b2459	eutT	2	9	12	G	23	M		1.075	60346.1	1355997600	0.534	33815	63324		1.05	59909.8	1216614600	0.529	30025	56758		1.103	65225.1	886671900	0.568	20962	36904.9		61827	1703.7	1153094700	1.39155e+08	0.543667	0.012252	28267.3	3813		1.076	0.015308	52329	7941.53	0.861677	0.927164
JW1946	ECK1961	b1963	yedR	2	11	12	G	24	M		1.099	59122.6	442022400	0.525	11104	21150.5		1.71	71170.7	177385500	0.65	4928	7581.54		1.402	70432	145604700	0.625	3563	5700.8		66908.5	3898.76	255004200	9.39581e+07	0.6	0.0381881	6531.67	2319.88		1.40367	0.176382	11477.6	4866.81	0.740584	1.03953
JW1534	ECK1534	b1541	ydfZ	2	15	1	G	2	N		0.579	48112.2	2008233900	0.408	31204	76480.4		1.074	58312.3	1460133900	0.549	34082	62080.1		0.855	57946	1561692600	0.509	32689	64222		54790.2	3340.66	1676686800	1.68346e+08	0.488667	0.0419537	32658.3	830.949		0.836	0.14321	67594.2	4485.92	0.861677	0.720362
JW2110	ECK2114	b2122	yehQ	2	13	2	G	3	N		0.446	33377.4	2420379000	0.319	37929	118900		1.169	56837.7	2236858200	0.55	48312	87840		0.906	47708.6	1760418000	0.444	44213	99578.8		45974.6	6827.68	2139218400	1.9667e+08	0.437667	0.0667591	43484.7	3019.36		0.840333	0.211279	102106	9054.77	0.946387	0.795281
JW0271	ECK0276	b0277	yagK	2	15	2	G	4	N		0.537	38009	2213575200	0.351	36674	104484		0.678	42422.2	2602166400	0.389	44385	114100		0.854	57496.1	1737007200	0.509	36451	71613		45975.8	5899.38	2184249600	2.5018e+08	0.416333	0.0476142	39170	2608.29		0.689667	0.0916958	96732.5	12862.9	0.946387	0.652692
JW0976	ECK0982	b4517	gnsA	2	13	3	G	5	N		0.56	42491.2	2240298000	0.368	37056	100696		0.652	42786.1	2352817800	0.386	42287	109552		0.8	52268.3	1514025900	0.463	32709	70645.8		45848.5	3211.02	2035713900	2.62859e+08	0.405667	0.0291338	37350.7	2768.85		0.670667	0.0699079	93631.1	11773.6	0.946387	0.63471
JW0313	ECK0319	b0321	yahG	2	15	3	G	6	N		0.723	55101.5	545198400	0.456	8959	19646.9		0.983	67763.1	633617100	0.537	12101	22534.5		1.059	67820.1	468618300	0.561	10795	19242.4		63561.6	4230.06	549144600	4.76719e+07	0.518	0.0317648	10618.3	911.308		0.921667	0.101727	20474.6	1036.52	0.946387	0.872253
JW0471	ECK0476	b0482	ybaP	2	15	5	G	10	N		0.511	43744.7	1691310600	0.365	26967	73882.2		0.619	48371.5	1649113200	0.408	27400	67156.9		0.719	52747	1339363800	0.463	24134	52125.3		48287.7	2599.09	1559929200	1.10953e+08	0.412	0.0283608	26167	1024.16		0.616333	0.0600592	64388.1	6431.44	0.946387	0.58329
JW1139	ECK1139	b1153	ymfQ	2	13	6	G	11	N		0.54	39249.4	2132988300	0.363	37539	103413		0.665	47956.3	2219122800	0.423	42336	100085		0.74	52170.3	1686312900	0.465	35186	75668.8		46458.7	3804.38	2012808000	1.6513e+08	0.417	0.0295973	38353.7	2103.84		0.648333	0.0583333	93055.7	8746.38	0.946387	0.613574
JW0537	ECK0540	b0549	ybcO	2	15	6	G	12	N		0.809	63256.2	323974800	0.529	5785	10935.7		1.036	69713.4	383573700	0.572	8330	14562.9		1.057	74368.6	318144600	0.611	6783	11101.5		69112.7	3221.9	341897700	2.09059e+07	0.570667	0.0236807	6966	740.354		0.967333	0.0793984	12200	1182.41	0.946387	0.915472
JW1247	ECK1249	b1255	yciC	2	13	7	G	13	N		0.543	44149	1390978800	0.387	25145	64974.2		0.958	61366.7	1499588100	0.531	30916	58222.2		0.932	63443.1	1475597700	0.552	32127	58201.1		56319.6	6114.75	1455388200	3.29409e+07	0.49	0.0518556	29396	2154.06		0.811	0.13421	60465.8	2254.18	0.946387	0.76752
JW0594	ECK0595	b0601	ybdM	2	15	7	G	14	N		0.726	49259.3	1488821400	0.431	29411	68239		1.179	63638.3	1516561200	0.577	35387	61329.3		1.046	61349.3	1387830600	0.544	29744	54676.5		58082.3	4460.7	1464404400	3.91154e+07	0.517333	0.0442053	31514	1938.88		0.983667	0.134433	61414.9	3915.39	0.946387	0.930929
JW1319	ECK1322	b1326	mpaA	2	13	8	G	15	N		0.712	46779.7	1507271400	0.416	24689	59348.6		0.829	52459.7	1572708600	0.478	26967	56416.3		0.819	54614.5	1647531000	0.492	30775	62550.8		51284.6	2336.79	1575837000	4.05197e+07	0.462	0.0233524	27477	1775.29		0.786667	0.0374448	59438.6	1771.45	0.946387	0.744491
JW1349	ECK1352	b4527	ydaF	2	13	9	G	17	N		0.424	37988.6	1733490900	0.329	31107	94550.2		0.667	47914.2	1453100400	0.4	29990	74975		0.839	53411.1	1334297700	0.472	30893	65451.3		46438	4512.86	1506963000	1.18342e+08	0.400333	0.0412809	30663.3	342.288		0.643333	0.120383	78325.5	8565.54	0.946387	0.608842
JW1376	ECK1378	b1381	ydbH	2	13	10	G	19	N		0.802	67025.2	617671800	0.559	12440	22254		0.917	69767.8	774301500	0.561	14806	26392.2		1.021	70998.9	702244800	0.545	16002	29361.5		69264	1174.44	698072700	4.52632e+07	0.555	0.00503322	14416	1046.59		0.913333	0.0632464	26002.5	2060.97	0.946387	0.864367
JW0834	ECK0841	b0850	ybjC	2	15	10	G	20	N		1.219	67954.7	1037377800	0.567	28332	49968.3		0.898	57676.5	1374825600	0.474	32223	67981		0.886	58577.4	1126491300	0.48	27041	56335.4		61402.9	3286.22	1179564900	1.00963e+08	0.507	0.03005	29198.7	1557.41		1.001	0.109055	58094.9	5273.73	0.946387	0.947333
JW1424	ECK1421	b1428	ydcK	2	13	11	G	21	N		0.945	47680.5	1200438000	0.443	32411	73162.5		0.92	48509.6	1349823600	0.42	35817	85278.6		0.883	45851.8	1094173200	0.41	30389	74119.5		47347.3	785.141	1214811600	7.4149e+07	0.424333	0.00976957	32872.3	1583.82		0.916	0.0180093	77520.2	3889.01	0.946387	0.86689
JW1452	ECK1451	b1457	ydcD	2	13	12	G	23	N		0.924	46377.1	1733658300	0.435	43889	100894		1.198	60441.3	754191900	0.517	20916	40456.5		1.131	60443.6	780576300	0.521	23020	44184.3		55754	4688.45	1089475500	3.22181e+08	0.491	0.0280238	29275	7332.2		1.08433	0.0824668	61845	19554.3	0.861677	0.934345
JW2066	ECK2077	b2081	yegQ	2	9	1	H	1	O		0.653	37851.3	2488988700	0.358	47399	132399		1.207	53918.6	2169025200	0.534	56697	106174		1.471	63280.1	1352867400	0.618	37157	60124.6		51683.3	7425.25	2003627100	3.38236e+08	0.503333	0.0766058	47084.3	5642.91		1.11033	0.241032	99566.1	21123.9	0.740584	0.822295
JW2539	ECK2552	b2555	yfhG	2	11	1	H	2	O		0.458	38678.8	1897883100	0.325	30347	93375.4		1.183	69346.4	1432728000	0.598	30115	50359.5		0.796	65561.2	1487939400	0.549	29917	54493.6		57862.2	9653.7	1606183500	1.46718e+08	0.490667	0.0840324	30126.3	124.26		0.812333	0.209449	66076.2	13701.7	0.861677	0.699969
JW2687	ECK2712	b2717	hycI	2	9	2	H	3	O		0.493	35780.4	2314293300	0.328	37806	115262		1.066	58588.7	1902927600	0.539	41327	76673.5		0.932	54093	1501051500	0.503	33019	65644.1		49487.4	6975.28	1906090800	2.34768e+08	0.456667	0.0651673	37384	2407.58		0.830333	0.173046	85859.9	15042	0.861677	0.715479
JW2605	ECK2621	b2625	yfjI	2	11	2	H	4	O		0.506	41514.7	2270358000	0.35	37623	107494		0.851	58608.4	1800291600	0.502	35142	70004		0.806	59036.5	1737602100	0.495	35188	71086.9		53053.2	5770.59	1936083900	1.68114e+08	0.449	0.0495412	35984.3	819.441		0.721	0.108282	82861.7	12320.3	0.861677	0.621269
JW2961	ECK2987	b2993	hybD	2	9	3	H	5	O		0.535	40133.6	1950577200	0.37	30146	81475.7		0.83	52408.6	2175611400	0.46	39728	86365.2		0.798	55530.5	1915434900	0.479	37720	78747.4		49357.6	4699.22	2013874500	8.15023e+07	0.436333	0.0336171	35864.7	2917.5		0.721	0.0934577	82196.1	2228.38	0.861677	0.621269
JW3902	ECK3923	b3931	hslU	2	9	4	H	7	O		0.511	43510.1	1800445500	0.376	30297	80577.1		0.827	54899.4	1915108200	0.484	36662	75747.9		0.881	57962.6	1580517900	0.518	32146	62057.9		52124	4396.82	1765357200	9.81683e+07	0.459333	0.0428071	33035	1890.42		0.739667	0.115391	72794.3	5546.26	0.861677	0.637354
JW2658	ECK2677	b2683	ygaH	2	11	4	H	8	O		0.493	43097.3	1552675500	0.377	22511	59710.9		0.62	53639.6	2838619800	0.428	44673	104376		0.571	57327.6	3056694300	0.45	67381	149736		51354.8	4263.81	2482663200	4.69236e+08	0.418333	0.0216205	44855	12953.2		0.561333	0.036979	104608	25988.1	0.861677	0.483688
JW3504	ECK3521	b3536	bcsE	2	9	5	H	9	O		0.633	52819	4526280900	0.468	76482	163423		0.83	66713.1	3914568900	0.554	68684	123978		0.763	66831.3	2622503700	0.553	50446	91222.4		62121.2	4651.19	3687784500	5.61149e+08	0.525	0.0285015	65204	7714.73		0.742	0.0578302	126208	20872.3	0.861677	0.639364
JW5909	ECK1554	b1560	ydfU	2	11	5	H	10	O		0.707	36680.4	329455800	0.456	4384	9614.04		0.954	62858	257470200	0.481	4602	9567.57		0.907	51897.7	218321100	0.496	3908	7879.03		50478.7	7590.05	268415700	3.25453e+07	0.477667	0.0116667	4298	204.903		0.856	0.0757254	9020.21	570.747	0.861677	0.737596
JW4131	ECK4169	b4173	hflX	2	9	6	H	11	O		0.632	49036.1	2082854700	0.426	38541	90471.8		0.827	54187.8	1914783300	0.477	39476	82758.9		0.861	65792.9	1336547700	0.571	27961	48968.5		56338.9	4955.41	1778061900	2.26026e+08	0.491333	0.042467	35326	3692.38		0.773333	0.071345	74066.4	12745	0.861677	0.666364
JW1596	ECK1599	b1604	ydgH	2	11	6	H	12	O		0.791	55712.9	802066500	0.468	15837	33839.7		0.901	68126.2	817218900	0.526	17907	34043.7		0.816	68058.8	658326600	0.54	13120	24296.3		63966	4126.59	759204000	5.0628e+07	0.511333	0.0220404	15621.3	1386.09		0.836	0.0332916	30726.6	3215.69	0.861677	0.720362
JW2152	ECK2158	b2165	yeiN	2	9	7	H	13	O		0.755	53315.9	1974401100	0.468	41382	88423.1		1.194	71016	2443384800	0.623	60183	96601.9		1	64097	2187543600	0.557	46737	83908.4		62809.7	5149.97	2201776500	1.35571e+08	0.549333	0.0449085	49434	5592.4		0.983	0.127013	89644.5	3714.84	0.861677	0.847028
JW1658	ECK1664	b1668	ydhS	2	11	7	H	14	O		0.869	59089.2	244075500	0.474	4315	9103.38		1.336	81601.3	298260000	0.623	6657	10685.4		1.249	71708.1	330622200	0.583	6869	11782.2		70799.6	6514.53	290985900	2.52472e+07	0.56	0.0445234	5947	818.292		1.15133	0.143383	10523.6	777.516	0.861677	0.992077
JW2232	ECK2230	b2238	yfaH	2	9	8	H	15	O		0.703	51162	1236144600	0.43	22237	51714		1.254	71135.5	1400387400	0.633	31247	49363.3		1.144	73268.9	1274144400	0.649	26118	40243.5		65188.8	7040.37	1303558800	4.96415e+07	0.570667	0.0704848	26534	2609.27		1.03367	0.168355	47106.9	3498.18	0.861677	0.890687
JW1722	ECK1731	b1733	chbG	2	11	8	H	16	O		0.505	39453	1490186700	0.343	28547	83227.4		0.994	56980	1503845100	0.509	36532	71772.1		0.91	59163.1	1106489700	0.522	25600	49042.1		51865.4	6238.09	1366840500	1.30235e+08	0.458	0.0576223	30226.3	3265.59		0.803	0.15096	68013.9	10045.7	0.861677	0.691927
JW2267	ECK2266	b2272	yfbM	2	9	9	H	17	O		0.453	42175.5	1204950600	0.354	20900	59039.5		0.906	57959.2	1280364300	0.498	26634	53481.9		1.007	62707.8	1149798600	0.553	24913	45050.6		54280.8	6205.94	1211704500	3.7842e+07	0.468333	0.0593305	24149	1698.77		0.788667	0.170347	52524	4066.55	0.861677	0.679576
JW1786	ECK1795	b1797	yeaR	2	11	9	H	18	O		1.089	63065.2	1050151500	0.558	24670	44211.5		0.992	62558.9	1151159400	0.523	24545	46931.2		1.087	66838.6	1091870100	0.575	24345	42339.1		64154.2	1350.11	1097727000	2.93052e+07	0.552	0.015308	24520	94.6485		1.056	0.0320052	44493.9	1333.11	0.861677	0.909931
JW2350	ECK2348	b2354	yfdK	2	9	10	H	19	O		1.052	60134.3	1017600300	0.521	26156	50203.5		0.901	57358.1	1252942200	0.493	26887	54537.5		1.008	60313.7	1147689900	0.528	27588	52250		59268.7	956.707	1139410800	6.80634e+07	0.514	0.0106927	26877	413.413		0.987	0.0448367	52330.3	1251.78	0.861677	0.850475
JW1832	ECK1844	b1843	yobB	2	11	10	H	20	O		1.506	94972.9	163234800	0.775	3880	5006.45		1.352	80602.2	184578300	0.671	4447	6627.42		1.23	76014.6	157225500	0.61	3786	6206.56		83863.3	5710.53	168346200	8.29937e+06	0.685333	0.0481675	4037.67	206.458		1.36267	0.0798526	5946.81	485.622	0.861677	1.17418
JW2393	ECK2392	b2398	yfeC	2	9	11	H	21	O		0.856	51245.2	1627855200	0.462	42757	92547.6		0.934	56331.3	1750010400	0.493	45569	92432		0.989	58294.8	1144743300	0.521	29194	56034.5		55290.4	2100.54	1507536300	1.84792e+08	0.492	0.0170392	39173.3	5055.27		0.926333	0.0385847	80338.1	12151.8	0.861677	0.7982
JW1892	ECK1903	b1904	yecR	2	11	11	H	22	O		0.878	52381.9	1149444000	0.469	29563	63034.1		1.026	57717.4	975615300	0.497	27437	55205.2		0.909	53250	725082300	0.477	19767	41440.3		54449.8	1652.94	950047200	1.23168e+08	0.481	0.00832666	25589	2974.99		0.937667	0.0450642	53226.5	6311.63	0.861677	0.807966
JW2444	ECK2455	b2460	eutQ	2	9	12	H	23	O		0.908	51984.5	1518552000	0.471	39452	83762.2		1.197	58357	1221398100	0.552	32739	59309.8		1.083	59460	960418800	0.538	24006	44620.8		56600.5	2329.85	1233456300	1.61232e+08	0.520333	0.0249956	32065.7	4471.57		1.06267	0.0840443	62564.3	11415.7	0.861677	0.915675
JW1988	ECK1999	b2006	yeeW	2	11	12	H	24	O		0.842	41795.3	1999521000	0.427	48164	112796		1.735	70351.4	205901100	0.644	6360	9875.78		1.366	69805.8	158165100	0.608	4421	7271.38		60650.8	9429.09	787862400	6.05986e+08	0.559667	0.0671425	19648.3	14268.8		1.31433	0.259078	43314.5	34749	0.740584	0.973374
JW2095	ECK2101	b2108	yehA	2	13	1	H	1	P		0.836	48916.4	2380537800	0.431	47379	109928		1.324	61210.1	1982451600	0.588	51684	87898		1.421	72600.8	1353063600	0.653	36877	56473.2		60909.1	6838.75	1905351000	2.99101e+08	0.557333	0.0658947	45313.3	4397.43		1.19367	0.181012	84766.4	15510.3	0.740584	0.88401
JW1539	ECK1539	b1546	tfaQ	2	15	1	H	2	P		0.714	39149.6	2070839700	0.36	39171	108808		1.252	54662	1634749200	0.56	40301	71966.1		1.215	62441.7	1469281500	0.598	36902	61709		52084.5	6846.25	1724956800	1.79417e+08	0.506	0.0738196	38791.3	999.402		1.06033	0.173496	80827.8	14300.2	0.740584	0.785266
JW0281	ECK0286	b0287	yagU	2	15	2	H	4	P		0.629	42318.1	1975302000	0.378	36630	96904.8		0.968	55179.4	2157341400	0.518	50619	97720.1		1.153	66615.4	1466105400	0.605	36642	60565.3		54704.3	7018.05	1866249600	2.06858e+08	0.500333	0.0661219	41297	4661		0.916667	0.153428	85063.4	12251.3	0.740584	0.678869
JW0984	ECK0990	b0999	cbpM	2	13	3	H	5	P		0.62	42429.8	1910763900	0.371	36983	99684.6		1.083	63845.1	1743543900	0.577	40649	70448.9		1.105	65572.6	1388657700	0.58	32949	56808.6		57282.5	7443.07	1680988500	1.5393e+08	0.509333	0.0691721	36860.3	2223.64		0.936	0.158128	75647.4	12647.2	0.740584	0.693187
JW0321	ECK0327	b0329	yahO	2	15	3	H	6	P		0.646	45636.8	1799866800	0.42	33852	80600		1.023	58918	1920825000	0.535	43989	82222.4		1.057	64517.5	1363427100	0.584	32552	55739.7		56357.4	5598.75	1694706300	1.6928e+08	0.513	0.0486038	36797.7	3615.2		0.908667	0.1317	72854.1	8569.97	0.740584	0.672944
JW1034	ECK1033	b1047	mdoC	2	13	4	H	7	P		0.631	39006	3022884000	0.373	54259	145466		0.945	49971.5	2646384300	0.477	60301	126417		0.848	47076.6	2088951300	0.442	47552	107584		45351.4	3280.9	2586073200	2.71284e+08	0.430667	0.0305523	54037.3	3681.99		0.808	0.0928242	126489	10935.9	0.740584	0.598392
JW0380	ECK0384	b0389	yaiA	2	15	4	H	8	P		0.668	41368.1	2704124700	0.374	52290	139813		1.041	58323	2686308300	0.537	65519	122009		0.914	60223	2170111500	0.526	47689	90663.5		53304.7	5993.42	2520181500	1.75111e+08	0.479	0.0525959	55166	5344.18		0.874333	0.109487	117495	14366.6	0.740584	0.647517
JW1098	ECK1098	b1112	ycfR	2	13	5	H	9	P		0.787	47012.8	1364391900	0.414	29752	71864.7		1.236	68177.6	1429374600	0.568	37713	66396.1		1.102	60432.5	1116873000	0.523	25825	49378.6		58541	6182.5	1303546500	9.52032e+07	0.501667	0.0457177	31096.7	3497.01		1.04167	0.133079	62546.5	6770.56	0.740584	0.771442
JW0489	ECK0494	b0500	ybbD	2	15	5	H	10	P		0.682	48823.7	1754304300	0.421	36009	85532.1		1.125	60740.6	1673732700	0.553	41839	75658.2		0.886	59299.1	1424126700	0.514	30477	59293.8		56287.8	3755.16	1617387900	9.93904e+07	0.496	0.0391535	36108.3	3280.3		0.897667	0.128016	73494.7	7651.2	0.740584	0.664798
JW1154	ECK1154	b1167	ymgC	2	13	6	H	11	P		0.699	47290.7	2139712200	0.418	44188	105713		1.244	64410.8	1970342100	0.602	50935	84609.6		0.966	61049.8	1548628200	0.541	33905	62671		57583.8	5237.2	1886227500	1.75738e+08	0.520333	0.054112	43009.3	4951.34		0.969667	0.157339	84331.2	12425.9	0.740584	0.71812
JW0539	ECK0543	b0551	ybcQ	2	15	6	H	12	P		0.689	51262.7	1694006100	0.414	31778	76758.5		1.585	86830.9	1751301900	0.681	43549	63948.6		1.205	76784.3	1622575800	0.658	35202	53498.5		71626	10586.6	1689294600	3.72346e+07	0.584333	0.0854251	36843	3495.65		1.15967	0.259644	64735.2	6726.08	0.740584	0.858831
JW1249	ECK1251	b1257	yciE	2	13	7	H	13	P		0.993	61475.2	1749475800	0.514	34236	66607		1.601	76279.1	1783321200	0.693	48110	69422.8		1.305	74879.5	1672277400	0.665	37713	56711.3		70877.9	4718.67	1735024800	3.28598e+07	0.624	0.0555908	40019.7	4167.83		1.29967	0.175535	64247	3854.56	0.740584	0.962512
JW0595	ECK0596	b0602	ybdN	2	15	7	H	14	P		0.662	39598.5	1630624500	0.355	28267	79625.4		1.758	71613.9	1540423800	0.684	45944	67169.6		1.295	67424.8	1418464800	0.614	33529	54607.5		59545.7	10046.7	1529837700	6.14735e+07	0.551	0.100062	35913.3	5240.32		1.23833	0.317654	67134.1	7222.06	0.740584	0.91709
JW5960	ECK1323	b4525	ymjC	2	13	8	H	15	P		0.724	48267.7	2089236600	0.426	42852	100592		1.544	69817	1886825700	0.654	54512	83351.7		1.09	63901.8	1684647000	0.579	37896	65450.8		60662.2	6428.16	1886903100	1.16795e+08	0.553	0.0670895	45086.7	4925.04		1.11933	0.237168	83131.3	10144.9	0.740584	0.82896
JW1353	ECK1356	b1358	ydaT	2	13	9	H	17	P		0.714	45680.7	1392231600	0.396	27993	70689.4		1.417	69123.2	1039937400	0.595	29478	49542.9		0.998	62970.8	967281300	0.544	22673	41678.3		59258.2	7017.26	1133150100	1.31228e+08	0.511667	0.0596778	26714.7	2065.8		1.043	0.204182	53970.2	8662.4	0.740584	0.772429
JW0773	ECK0779	b0790	ybhP	2	15	9	H	18	P		1.051	68162.6	134209800	0.552	2804	5079.71		1.892	88013.6	113338800	0.7	2576	3680		1.397	82842.8	104337900	0.655	2346	3581.68		79673	5945.63	117295500	8.8473e+06	0.635667	0.0438039	2575.33	132.214		1.44667	0.244043	4113.8	483.79	0.740584	1.07138
JW1377	ECK1379	b1382	ynbE	2	13	10	H	19	P		0.979	57374.4	1920039300	0.508	45052	88685		1.369	65640.4	1265911200	0.609	35331	58014.8		1.029	64894.3	1164205800	0.562	27299	48574.7		62636.4	2639.8	1450052100	2.36821e+08	0.559667	0.0291795	35894	5132.58		1.12567	0.12252	65091.5	12107.4	0.740584	0.833651
JW0837	ECK0844	b0853	ybjN	2	15	10	H	20	P		1.002	58472.7	1871029800	0.525	44148	84091.4		1.57	71692.5	1142735400	0.649	32880	50662.6		1.175	71642.4	1091547000	0.621	28175	45370.4		67269.2	4398.26	1368437400	2.5173e+08	0.598333	0.037547	35067.7	4738.97		1.249	0.16809	60041.5	12121.6	0.740584	0.924989
JW1427	ECK1424	b1431	ydcL	2	13	11	H	21	P		0.731	44063.1	2447880300	0.404	50614	125282		1.337	63718.6	1590772500	0.574	47648	83010.5		1.103	60268	1448871300	0.54	35547	65827.8		56016.5	6059.16	1829174700	3.12053e+08	0.506	0.0519359	44603	4608.24		1.057	0.176443	91373.5	17665	0.740584	0.782797
JW1004	ECK1009	b1019	ycdB	2	15	11	H	22	P		0.749	44089.8	2357614800	0.412	52189	126672		1.409	58136.6	1460482200	0.544	44577	81943		1.028	53991.9	1314900900	0.484	32264	66661.2		52072.8	4166.94	1710999300	3.26028e+08	0.48	0.0381576	43010	5804.97		1.062	0.191283	91758.8	18005.5	0.740584	0.7865
JW1453	ECK1452	b1458	yncI	2	13	12	H	23	P		0.831	46861.7	2468556900	0.434	53681	123689		1.548	64535.7	1633608900	0.612	48900	79902		1.227	66914.6	1562511600	0.603	39028	64723.1		59437.3	6325.2	1888225800	2.9089e+08	0.549667	0.0578917	47203	4314.22		1.202	0.207357	89438	17677.2	0.740584	0.890182
JW1140	ECK1140	b1154	ycfK	2	15	12	H	24	P		1.16	52656.3	2181969000	0.504	62303	123617		1.515	60919.7	1624692600	0.574	51074	88979.1		1.076	61125.1	1483686900	0.54	43759	81035.2		58233.7	2789.33	1763449500	2.13182e+08	0.539333	0.02021	52378.7	5392.79		1.25033	0.134537	97877.1	13072.7	0.740584	0.925977
JW1945	ECK1960	b1962	yedJ	3	19	1	A	2	A		0.696	52050.2	1009960200	0.435	22793	52397.7		1.01	67777.6	1056076200	0.552	25943	46998.2		0.765	51974.2	954983700	0.446	22026	49385.7		57267.4	5255.19	1007006700	2.92202e+07	0.477667	0.0373021	23587.3	1198.46		0.823667	0.0952721	49593.8	1562.18	0.740584	0.609994
JW1314	ECK1317	b1321	ycjX	3	17	2	A	3	A		0.545	35476	2112498000	0.351	42734	121749		1.075	66380.8	126588600	0.546	2775	5082.42		0.563	39158.6	3108637800	0.371	62907	169561		47005.1	9745.98	1782574800	8.76507e+08	0.422667	0.0619363	36138.7	17669.1		0.727667	0.173744	98797.5	48847.9	0.740584	0.538898
JW2563	ECK2577	b2579	yfiD	3	19	2	A	4	A		0.677	57771.7	357732000	0.463	6548	14142.5		0.997	72264.5	206387100	0.554	4620	8339.35		0.753	59449.6	282690900	0.482	5430	11265.6		63161.9	4576.99	282270000	4.369e+07	0.499667	0.0277148	5532.67	558.928		0.809	0.0965263	11249.2	1675.26	0.740584	0.599132
JW1623	ECK1627	b1631	rsxG	3	17	3	A	5	A		0.743	54356.3	300405600	0.435	6442	14809.2		1.058	70567.4	309890700	0.548	7661	13979.9		0.738	56809.1	256312800	0.46	6027	13102.2		60577.6	5044.83	288869700	1.65071e+07	0.481	0.0342685	6710	490.359		0.846333	0.105843	13963.8	492.841	0.740584	0.626781
JW0570	ECK0573	b0581	ybdK	3	19	3	A	6	A		0.817	50618.8	212079600	0.417	4050	9712.23		0.954	63653.4	413767800	0.498	8106	16277.1		0.758	51520	255132000	0.442	5403	12224		55264	4202.73	293659800	6.13265e+07	0.452333	0.0239467	5853	1192.29		0.843	0.0580546	12737.8	1912.45	0.740584	0.624312
JW2174	ECK2180	b2186	yejK	3	17	4	A	7	A		0.589	42971.7	1629288900	0.352	34172	97079.5		0.884	58581.1	1707327000	0.496	38767	78159.3		0.785	52191.6	1770522300	0.455	45643	100314		51248.1	4530.68	1702379400	4.08456e+07	0.434333	0.0428343	39527.3	3333.14		0.752667	0.0866801	91851	6909.27	0.740584	0.557413
JW1632	ECK1636	b1640	ydhH	3	19	4	A	8	A		0.567	46432.3	532434600	0.377	10039	26628.6		1.014	71486.6	715043700	0.542	15139	27931.7		1.181	63655.5	617940000	0.539	15138	28085.3		60524.8	7400.01	621806100	5.27501e+07	0.486	0.0545069	13438.7	1699.83		0.920667	0.183287	27548.6	462.096	0.740584	0.681831
JW2346	ECK2344	b2350	yfdG	3	17	5	A	9	A		0.548	42572.9	1493401500	0.347	32689	94204.6		0.738	51713.9	1977153300	0.424	53168	125396		0.939	53796.7	1343300400	0.461	39789	86310.2		49361.2	3446.98	1604618400	1.91241e+08	0.410667	0.0335774	41882	6003.69		0.741667	0.112887	101970	11932.6	0.740584	0.549266
JW0115	ECK0118	b0119	yacL	3	19	5	A	10	A		0.557	42871.9	1583049600	0.356	30150	84691		0.987	63489.2	1936324800	0.537	41509	77298		1.142	63107.2	1534617000	0.556	40362	72593.5		56489.4	6809.68	1684663800	1.26605e+08	0.483	0.0637364	37340.3	3610.38		0.895333	0.174984	78194.2	3520.88	0.740584	0.66307
JW2738	ECK2763	b2768	ygcP	3	17	6	A	11	A		0.908	61652.6	245811600	0.5	4917	9834		1.182	69893.6	184947300	0.568	3866	6806.34		1.202	67970.8	214867800	0.591	5529	9355.33		66505.7	2489.21	215208900	1.75708e+07	0.553	0.0273191	4770.67	485.61		1.09733	0.0948426	8665.22	939.658	0.740584	0.812668
JW0493	ECK0498	b0505	allA	3	19	6	A	12	A		1.04	55085.1	337590900	0.507	8342	16453.6		1.288	71265.4	405951300	0.578	9779	16918.7		1.244	57644.6	345204900	0.526	9434	17935.4		61331.7	5021.51	362915700	2.16298e+07	0.537	0.0212211	9185	433.106		1.19067	0.0763966	17102.6	437.503	0.740584	0.881789
JW0113	ECK0116	b0117	yacH	3	17	7	A	13	A		1.358	68400.9	918170100	0.624	22979	36825.3		1.683	75963.1	1067993100	0.673	26848	39893		1.174	57171.2	1061528400	0.544	27936	51352.9		67178.4	5459.09	1015897200	4.88992e+07	0.613667	0.0375958	25921	1504.16		1.405	0.148803	42690.4	4420.86	0.740584	1.04052
JW0821	ECK0827	b0837	yliI	3	19	7	A	14	A		0.795	46186.7	2134503000	0.422	45641	108154		1.172	61334.5	2549516400	0.544	60368	110971		1.174	55220.4	2337691500	0.523	60442	115568		54247.2	4399.76	2340570300	1.19813e+08	0.496333	0.0376578	55483.7	4921.38		1.047	0.126001	111564	2160.67	0.740584	0.775391
JW0942	ECK0950	b0959	yccR	3	19	8	A	16	A		0.643	42545.8	2383163100	0.364	49749	136673		0.978	58163.8	2047241700	0.518	44639	86175.7		1.122	60085.5	1858059000	0.554	46906	84667.9		53598.4	5554.06	2096154600	1.53545e+08	0.478667	0.0582676	47098	1478.25		0.914333	0.141892	102506	17089.3	0.740584	0.677141
JW0235	ECK0247	b0246	yafW	3	17	9	A	17	A		0.701	50269.9	2217137400	0.431	51043	118429		0.896	58233.1	2112845400	0.51	49110	96294.1		0.806	53211.7	2310997500	0.467	56083	120092		53904.9	2324.74	2213660100	5.7228e+07	0.469333	0.0228352	52078.7	2078.47		0.801	0.0563471	111605	7670.55	0.740584	0.593208
JW0080	ECK0083	b0082	mraW	3	19	9	A	18	A		0.562	35359.7	1551243600	0.363	29502	81272.7		1.015	69177.7	177442200	0.585	3743	6398.29		0.681	42817.7	2865685500	0.404	67312	166614		49118.4	10258.1	1531457100	7.76092e+08	0.450667	0.0682015	33519	18460.4		0.752667	0.13559	84761.6	46283.1	0.740584	0.557413
JW2242	ECK2241	b2248	yfaX	3	17	10	A	19	A		0.824	52902.7	1643373000	0.462	28331	61322.5		1.242	82389.1	2082690000	0.619	42957	69397.4		0.908	66888.8	2236471200	0.519	41034	79063.6		67393.5	8515.71	1987511400	1.77703e+08	0.533333	0.0458851	37440.7	4588.54		0.991333	0.127658	69927.8	5128.27	0.740584	0.734166
JW1674	ECK1680	b1684	sufA	3	19	11	A	22	A		0.843	53032.2	329426100	0.442	6581	14889.1		1.484	72964.2	293580000	0.604	7278	12049.7		0.979	53787.9	368154000	0.468	8563	18297		59928.1	6521.69	330386700	2.1533e+07	0.504667	0.0502306	7474	580.486		1.102	0.194993	15078.6	1805.94	0.740584	0.816124
JW0703	ECK0702	b0713	ybgL	3	17	12	A	23	A		0.661	39047.3	1269722700	0.4	22713	56782.5		1.473	70137.6	123258600	0.602	3030	5033.22		0.822	40593.7	1776135600	0.429	38666	90130.5		49926.2	10115.6	1056372300	4.88924e+08	0.477	0.0630582	21469.7	10306		0.985333	0.248223	50648.8	24756.2	0.740584	0.729722
JW2324	ECK2321	b2327	yfcA	3	19	12	A	24	A		0.805	55461.8	1119960900	0.486	23781	48932.1		1.384	70801.1	122411700	0.612	2932	4790.85		1.62	66337.3	160540200	0.627	3378	5387.56		64200.1	4555.2	467637600	3.26347e+08	0.575	0.0447102	10030.3	6876.54		1.26967	0.242116	19703.5	14615.3	0.740584	0.940295
JW2521	ECK2534	b2537	hcaR	3	21	1	A	1	B		0.679	40399.5	2346747300	0.354	46934	132582		1.3	63186	2028182400	0.581	53789	92580		0.714	48484.4	2537001000	0.437	62780	143661		50690	6669.71	2303976900	1.48432e+08	0.457333	0.0663132	54501	4588.18		0.897667	0.20142	122941	15513.8	0.740584	0.664798
JW1106	ECK1106	b1120	cobB	3	21	2	A	3	B		0.528	40910.3	2256702300	0.338	44008	130201		0.659	54858.5	2966952600	0.435	65176	149830		0.518	44360.8	3070100700	0.358	60770	169749		46709.9	4194.31	2764585200	2.55681e+08	0.377	0.0295691	56651.3	6448.35		0.568333	0.0454252	149927	11416.5	0.861677	0.48972
JW2731	ECK2756	b2761	ygcB	3	23	2	A	4	B		0.596	43757.2	1905031800	0.36	35949	99858.3		0.727	54566.9	2200420800	0.423	43407	102617		0.539	43365.6	2210170500	0.357	44052	123395		47229.9	3670.25	2105207700	1.00128e+08	0.38	0.0215174	41136	2600.18		0.620667	0.0556547	108623	7428.57	0.861677	0.534814
JW0079	ECK0082	b0081	mraZ	3	21	3	A	5	B		0.505	46963.4	1675186200	0.376	26319	69997.3		0.639	59071.5	1819872900	0.446	31659	70984.3		0.497	48104.6	1898031600	0.374	33265	88943.9		51379.9	3859.9	1797696900	6.52785e+07	0.398667	0.0236737	30414.3	2099.49		0.547	0.0460579	76641.8	6157.6	0.861677	0.471337
JW2800	ECK2828	b2832	ygdQ	3	23	3	A	6	B		0.627	54902.1	394272900	0.459	7637	16638.3		0.865	77123.3	614825100	0.624	12928	20717.9		0.703	57819.9	632097900	0.472	14414	30538.1		63281.8	6971.86	547065300	7.65587e+07	0.518333	0.0529664	11659.7	2056.57		0.731667	0.0701839	22631.5	4125.01	0.861677	0.63046
JW0403	ECK0407	b0413	ybaD	3	21	4	A	7	B		0.528	42363.4	2051855100	0.327	45080	137859		0.554	49998.2	2551278600	0.389	54086	139039		0.507	45567.3	2208582000	0.364	51944	142703		45976.3	2213.44	2270571900	1.47465e+08	0.36	0.0180093	50370	2716.32		0.529667	0.0135933	139867	1458.4	0.861677	0.456402
JW1682	ECK1690	b1692	ydiB	3	23	4	A	8	B		0.42	36735	1192775400	0.298	21906	73510.1		0.603	45238.1	1495676700	0.378	30926	81814.8		0.686	44021.7	1098006300	0.379	27849	73480.2		41998.3	2654.94	1262152800	1.19924e+08	0.351667	0.0268349	26893.7	2647.3		0.569667	0.0785755	76268.4	2773.24	0.861677	0.490869
JW2562	ECK2576	b2578	yfiK	3	21	5	A	9	B		0.484	44950.9	1308426300	0.356	23274	65376.4		0.754	58041.5	1843423200	0.461	34878	75657.3		1.051	64684.3	1563861600	0.534	33626	62970		55892.2	5797.02	1571903700	1.54493e+08	0.450333	0.0516602	30592.7	3677.14		0.763	0.163741	68001.2	3890.53	0.861677	0.65746
JW1261	ECK1263	b1269	rluB	3	23	5	A	10	B		0.441	41176.4	1735540200	0.323	33165	102678		0.525	44530.9	2043720900	0.343	43034	125464		0.851	54480.4	1651601700	0.437	43482	99501.1		46729.3	3994.73	1810287600	1.19205e+08	0.367667	0.0351441	39893.7	3366.82		0.605667	0.12504	109214	8176.25	0.861677	0.521889
JW0589	ECK0590	b0597	ybdB	3	21	6	A	11	B		0.468	44271.7	2179322100	0.361	37954	105136		0.582	44942	2668055400	0.369	52953	143504		0.661	44145.2	2270325600	0.388	53819	138709		44453	247.243	2372567700	1.50061e+08	0.372667	0.00800694	48242	5150.07		0.570333	0.0560188	129116	12069.9	0.861677	0.491443
JW1052	ECK1050	b1065	mdtH	3	23	6	A	12	B		0.841	54558.7	566556300	0.442	10023	22676.5		0.755	58615.8	879221700	0.511	14756	28876.7		0.724	53611.6	771082200	0.457	14530	31794.3		55595.4	1534.78	738953400	9.16772e+07	0.47	0.0209523	13103	1541.38		0.773333	0.0349968	27782.5	2688.35	0.861677	0.666364
JW2012	ECK2025	b4540	wbbL	3	21	7	A	13	B		0.514	40747.9	2298543300	0.335	43145	128791		0.586	45457.6	3212766000	0.378	61646	163085		0.685	41989.6	2595274200	0.393	51849	131931		42731.7	1409.27	2702194500	2.69274e+08	0.368667	0.0173813	52213.3	5343.88		0.595	0.0495681	141269	10945.4	0.861677	0.512698
JW1272	ECK1275	b1280	yciM	3	23	8	A	16	B		0.427	35569.5	2637044100	0.299	50307	168251		0.581	43499.5	2967809400	0.374	64659	172885		0.574	38768.1	2791173600	0.343	65812	191872		39279.1	2303.4	2798675700	9.55574e+07	0.338667	0.0217588	60259.3	4987.29		0.527333	0.0502073	177669	7226.17	0.861677	0.454391
JW2227	ECK2225	b2233	yfaL	3	21	9	A	17	B		0.497	41901.5	2385049500	0.343	44750	130466		0.787	52076.6	2440368900	0.445	53395	119989		0.696	48032.4	2446604100	0.416	56862	136688		47336.8	2957.82	2424007500	1.9562e+07	0.401333	0.0303443	51669	3601.36		0.66	0.085629	129048	4872.44	0.861677	0.568707
JW1336	ECK1339	b1342	ydaN	3	23	9	A	18	B		0.514	46235.2	1638116100	0.361	30043	83221.6		0.977	67892.2	1919116800	0.537	40236	74927.4		0.978	64404.7	1832414400	0.514	38254	74424.1		59510.7	6713.68	1796549100	8.30764e+07	0.470667	0.0552338	36177.7	3120.24		0.823	0.1545	77524.4	2852.32	0.861677	0.70916
JW2295	ECK2292	b2298	yfcC	3	21	10	A	19	B		0.72	56970.3	868666500	0.447	17278	38653.2		0.87	64360.2	905986800	0.515	21219	41201.9		0.73	58337.4	1032971400	0.461	25002	54234.3		59889.3	2270.02	935874900	4.97293e+07	0.474333	0.0207311	21166.3	2229.88		0.773333	0.0484195	44696.5	4825.32	0.861677	0.666364
JW1437	ECK1436	b1442	ydcU	3	23	10	A	20	B		0.589	44030.1	2275101900	0.373	35574	95372.7		0.88	58310.8	2601904500	0.514	48070	93521.4		0.789	51786.2	2893896900	0.447	51578	115387		51375.7	4127.6	2590301100	1.78725e+08	0.444667	0.0407199	45074	4856.75		0.752667	0.0859464	101427	7000.43	0.861677	0.648556
JW2386	ECK2385	b2389	yfeO	3	21	11	A	21	B		0.622	51333.9	1478921400	0.405	26805	66185.2		1.155	76945	1586314800	0.608	34423	56616.8		0.918	66385.4	1844150400	0.508	39163	77092.5		64888.1	7431.08	1636462200	1.08373e+08	0.507	0.0586032	33463.7	3599.55		0.898333	0.154178	66631.5	5915.05	0.861677	0.774073
JW1652	ECK1656	b1660	ydhC	3	23	11	A	22	B		0.557	47814.1	2858114700	0.375	55035	146760		0.746	56023	2801678400	0.476	58879	123695		0.645	50551.1	2881922400	0.414	61936	149604		51462.8	2413.15	2847238500	2.37942e+07	0.421667	0.0294071	58616.7	1996.46		0.649333	0.0546026	140020	8203.37	0.861677	0.559516
JW2518	ECK2531	b2534	yfhR	3	21	12	A	23	B		0.663	45951.5	2016516600	0.381	40405	106050		0.853	57694.4	1849950000	0.505	43470	86079.2		0.697	49583.8	2122582500	0.429	51988	121184		51076.6	3471.09	1996349700	7.93455e+07	0.438333	0.0360986	45287.7	3465.04		0.737667	0.058496	104438	10165.9	0.861677	0.63563
JW1716	ECK1725	b1727	yniC	3	23	12	A	24	B		0.983	58104	1019815200	0.495	24082	48650.5		1.239	64504.2	730163700	0.571	20286	35527.1		1.42	60168.4	680960700	0.576	20274	35197.9		60925.5	1885.95	810313200	1.0571e+08	0.547333	0.0262064	21547.3	1267.34		1.214	0.126769	39791.9	4430.34	0.740584	0.899069
JW1177	ECK1176	b1188	ycgB	3	17	1	B	1	C		0.79	58232.2	417917700	0.491	8133	16564.2		2.04	77430.1	231169500	0.691	5765	8342.98		1.132	58555	333808200	0.54	8376	15511.1		64739.1	6346.16	327631800	5.39979e+07	0.574	0.0601858	7424.67	832.793		1.32067	0.372971	13472.7	2582.84	0.740584	0.978065
JW2086	ECK2092	b2099	yegU	3	19	1	B	2	C		0.682	57065.6	361354500	0.46	7298	15865.2		1.257	84368.2	264399300	0.617	5693	9226.9		0.779	62408.2	315589500	0.486	6343	13051.4		67947.3	8354.03	313781100	2.80032e+07	0.521	0.0485833	6444.67	466.104		0.906	0.17772	12714.5	1923.71	0.861677	0.780679
JW1315	ECK1318	b1322	ycjF	3	17	2	B	3	C		0.553	40877	2040126300	0.341	38604	113208		0.678	54689.5	2505487500	0.436	48099	110319		0.466	40309.7	2586110400	0.321	47599	148283		45292	4701.57	2377241400	1.70157e+08	0.366	0.035473	44767.3	3085.05		0.565667	0.061526	123937	12201.9	0.946387	0.53534
JW0009	ECK0010	b0010	yaaH	3	19	2	B	4	C		0.591	49757.8	478426500	0.397	9226	23239.3		0.851	66389.7	528976800	0.521	11222	21539.3		0.701	51691.4	523894500	0.423	10838	25621.7		55946.3	5251.43	510432600	1.60702e+07	0.447	0.0377536	10428.7	611.465		0.714333	0.075351	23466.8	1183.97	0.946387	0.676036
JW1714	ECK1723	b1725	yniA	3	17	3	B	5	C		0.578	42679.3	1937106900	0.338	37406	110669		0.657	50987.3	2173021200	0.396	42358	106965		0.53	40737.1	2312719200	0.326	46450	142485		44801.2	3143.45	2140949100	1.09609e+08	0.353333	0.0216128	42071.3	2614.71		0.588333	0.037024	120039	11273.5	0.946387	0.556791
JW0699	ECK0698	b0709	ybgH	3	19	3	B	6	C		0.648	50869.4	951824700	0.404	18924	46841.6		0.812	62114.4	1337648400	0.487	27920	57330.6		0.732	51562.3	1285309800	0.418	28773	68834.9		54848.7	3638.34	1191594300	1.20833e+08	0.436333	0.0256537	25205.7	3150.47		0.730667	0.0473474	57669	6351.19	0.946387	0.691493
JW2175	ECK2181	b2187	yejL	3	17	4	B	7	C		0.663	53973.3	245828700	0.448	4660	10401.8		0.86	61567.9	255899700	0.464	4870	10495.7		0.956	64096.9	248690700	0.509	5264	10341.8		59879.4	3041.96	250139700	2.99616e+06	0.473667	0.0182605	4931.33	177.036		0.826333	0.0862406	10413.1	44.7699	0.946387	0.782031
JW1696	ECK1704	b1706	ydiU	3	19	4	B	8	C		0.483	39168.6	1851217200	0.321	32321	100688		0.657	51763.8	2137887900	0.433	39164	90448		0.803	52689.4	1897235100	0.448	40538	90486.6		47873.9	4360.85	1962113400	8.88855e+07	0.400667	0.040068	37341	2541.15		0.647667	0.0924938	93874.4	3407.07	0.946387	0.612943
JW0126	ECK0129	b0130	yadE	3	19	5	B	10	C		0.556	52852.7	374971500	0.403	6949	17243.2		0.822	60726.4	455165100	0.482	9458	19622.4		1.316	72605.8	341843400	0.563	8179	14527.5		62061.6	5741.18	390660000	3.36405e+07	0.482667	0.0461892	8195.33	724.332		0.898	0.22266	17131	1471.83	0.946387	0.849856
JW0118	ECK0121	b0122	yacC	3	17	7	B	13	C		0.544	54074.1	750088800	0.419	14574	34782.8		0.69	55701.6	965844000	0.439	20647	47031.9		0.592	50133.1	808961400	0.4	19261	48152.5		53302.9	1653.1	841631400	6.43896e+07	0.419333	0.0112596	18160.7	1837.42		0.608667	0.0429625	43322.4	4282.03	0.946387	0.576034
JW0831	ECK0838	b0847	ybjL	3	19	7	B	14	C		0.637	59832.4	358691400	0.463	6733	14542.1		0.773	64601.4	309337200	0.482	6325	13122.4		0.791	56288.9	279639900	0.433	6218	14360.3		60240.9	2408.29	315889500	2.30542e+07	0.459333	0.0142634	6425.33	156.904		0.733667	0.0486118	14008.3	446.03	0.946387	0.694333
JW0203	ECK0213	b0213	yafS	3	17	8	B	15	C		0.693	67810.3	208209600	0.538	3667	6815.99		0.908	73044.4	202081500	0.533	3986	7478.42		1.088	73862.5	182955600	0.542	3766	6948.34		71572.4	1895.81	197748900	7.60525e+06	0.537667	0.00260342	3806.33	94.2697		0.896333	0.114176	7080.92	202.393	0.946387	0.848278
JW0944	ECK0952	b0961	yccF	3	19	8	B	16	C		0.555	48740.7	1176529500	0.382	20771	54374.3		0.822	62162.7	1676406600	0.48	33018	68787.5		0.782	55948.1	1608027300	0.439	34969	79656		55617.2	3878.15	1486987800	1.56479e+08	0.433667	0.0284156	29586	4443.34		0.719667	0.0831391	67606	7322.07	0.946387	0.681083
JW5956	ECK0248	b4504	ykfH	3	17	9	B	17	C		0.595	71301.6	302971500	0.614	5346	8706.84		1.091	101949	236493900	0.802	4961	6185.79		0.895	89248.6	280999800	0.712	6067	8521.07		87499.9	8890.36	273488400	1.95545e+07	0.709333	0.0542873	5458	324.149		0.860333	0.144228	7804.56	811.164	0.946387	0.814208
JW0656	ECK0651	b0659	ybeY	3	19	9	B	18	C		0.489	37853.6	2212207200	0.322	39536	122783		0.752	49295.6	1588874400	0.421	37847	89897.9		0.795	51477	2307886200	0.415	55626	134039		46208.7	4224.78	2036322600	2.25423e+08	0.386	0.0320468	44336.3	5665.85		0.678667	0.0956423	115573	13242.4	0.946387	0.642281
JW2670	ECK2695	b2700	ygaD	3	19	10	B	20	C		0.683	58010.6	983852100	0.463	18689	40365		0.868	69712.4	1180819800	0.521	25642	49216.9		0.768	57672.3	1145886300	0.447	25675	57438.5		61798.4	3958.19	1103519400	6.06775e+07	0.477	0.0224796	23335.3	2323.19		0.773	0.0534634	49006.8	4929.81	0.946387	0.731557
JW1754	ECK1763	b1765	ydjA	3	19	11	B	22	C		0.524	39657.3	3150671400	0.323	57344	177536		0.816	59950.3	3419461800	0.467	78852	168848		0.57	46817.4	3466849500	0.356	76229	214126		48808.3	5942.07	3345660900	9.84498e+07	0.382	0.0435546	70808.3	6774.62		0.636667	0.0906446	186837	13873.4	0.946387	0.602533
JW0903	ECK0911	b0920	ycbC	3	17	12	B	23	C		0.556	35517.5	2932861500	0.327	47058	143908		0.95	53651.2	3185190000	0.489	65118	133166		0.756	44143.1	3068324100	0.423	59179	139903		44437.3	5236.83	3062125200	7.29069e+07	0.413	0.0470319	57118.3	5314.31		0.754	0.113742	138992	3134.38	0.861677	0.649704
JW2808	ECK2838	b2840	ygeA	3	19	12	B	24	C		0.996	56826	1779290100	0.553	39102	70708.9		1.357	69839.4	216976500	0.598	4935	8252.51		1.315	68630.7	1845075600	0.647	53177	82190.1		65098.7	4151.03	1280447400	5.32074e+08	0.599333	0.0271437	32404.7	14323.2		1.22267	0.11398	53717.2	22972.7	0.740584	0.905487
JW2715	ECK2740	b2745	truD	3	21	1	B	1	D		0.597	42140.2	1974287700	0.36	39570	109917		1.419	65590.7	1457545500	0.615	36704	59681.3		0.695	49191	2198110500	0.437	51759	118442		52307.3	6946.6	1876647900	2.19286e+08	0.470667	0.0755123	42677.7	4615.43		0.903667	0.259215	96013.2	18331.9	0.740584	0.669241
JW2635	ECK2654	b2660	ygaF	3	23	1	B	2	D		0.708	51225	1364040000	0.455	29529	64898.9		1.182	69044.1	1524471300	0.562	31101	55339.9		0.678	48805.9	2081171700	0.408	42686	104623		56358.4	6381.21	1656561000	2.17298e+08	0.475	0.0455668	34438.7	4148.56		0.856	0.16323	74953.8	15088.9	0.861677	0.737596
JW2803	ECK2831	b2835	ygeD	3	23	3	B	6	D		0.541	47403.9	1525095900	0.379	25922	68395.8		0.715	59040.4	2420006400	0.452	43545	96338.5		0.712	57713.1	2346799500	0.443	44464	100370		54719.2	3677.64	2097300600	2.86882e+08	0.424667	0.0229807	37977	6033.34		0.656	0.0575065	88368.2	10053.8	1	0.656
JW0850	ECK0857	b0866	ybjQ	3	21	4	B	7	D		0.543	41940.6	1961823600	0.354	33880	95706.2		0.705	51738.7	2374784100	0.43	41726	97037.2		0.797	49638.6	2070122400	0.425	41089	96680		47772.6	2978.35	2135576700	1.23622e+08	0.403	0.0245425	38898.3	2515.9		0.681667	0.0742458	96474.5	397.73	1	0.681667
JW2128	ECK2133	b2140	dusC	3	23	4	B	8	D		0.443	37990.4	2376564300	0.303	42505	140281		0.586	48234.1	2736438300	0.371	50840	137035		0.612	48857.1	2860355700	0.374	61534	164529		45027.2	3522.98	2657786100	1.4509e+08	0.349333	0.0231828	51626.3	5507.25		0.547	0.0525389	147282	8674.62	1	0.547
JW2578	ECK2594	b2597	yfiA	3	21	5	B	9	D		0.473	39912.8	1842176700	0.337	33032	98017.8		0.685	50652.7	2195843400	0.42	39475	93988.1		0.848	51280.5	1837963800	0.457	41129	89997.8		47282	3689.04	1958661300	1.18597e+08	0.404667	0.0354793	37878.7	2469.92		0.668667	0.108561	94001.2	2315.18	1	0.668667
JW0721	ECK0720	b0732	mngB	3	21	6	B	11	D		0.514	46400.9	1666784700	0.392	28335	72283.2		0.706	52075.3	2402096400	0.438	40633	92769.4		1.07	59275.3	1863756000	0.516	37742	73143.4		52583.9	3725.18	1977545700	2.19759e+08	0.448667	0.0361909	35570	3712.52		0.763333	0.163043	79398.7	6689.98	1	0.763333
JW1086	ECK1086	b1100	ycfH	3	23	6	B	12	D		0.467	48663.8	1563986700	0.387	25074	64790.7		0.668	56110.9	1977670800	0.445	33370	74988.8		1.099	62869.9	1464744600	0.544	30796	56610.3		55881.6	4102.56	1668800700	1.5707e+08	0.458667	0.0458342	29746.7	2451.65		0.744667	0.186426	65463.3	5316.05	1	0.744667
JW2119	ECK2124	b2131	yehZ	3	21	8	B	15	D		0.459	43850.8	1629111600	0.359	27961	77885.8		0.68	51847.1	2268886500	0.428	38908	90906.5		0.873	56485	2043013500	0.473	37484	79247.4		50727.6	3689.88	1980337200	1.87327e+08	0.42	0.0331512	34784.3	3436.34		0.670667	0.119603	82679.9	4132.06	1	0.670667
JW1278	ECK1280	b1285	gmr	3	23	8	B	16	D		0.644	55490.6	1062059400	0.443	18582	41945.8		0.745	60642.6	1581295500	0.498	30576	61397.6		0.769	57549.6	1564515900	0.474	33357	70373.4		57894.3	1497.22	1402623600	1.70351e+08	0.471667	0.0159199	27505	4533.15		0.719333	0.0382985	57905.6	8390.02	1	0.719333
JW2245	ECK2244	b2251	yfaO	3	21	9	B	17	D		0.56	45185.3	1936630800	0.371	36104	97315.4		0.797	53661.2	1992767400	0.459	40904	89115.5		0.557	41267.1	2380757400	0.354	50384	142328		46704.5	3657.61	2103385200	1.3963e+08	0.394667	0.0325389	42464	4195.43		0.638	0.0795047	109586	16541	1	0.638
JW2299	ECK2296	b2302	yfcG	3	21	10	B	19	D		0.662	56144.5	1490897700	0.438	25535	58299.1		0.88	65908.9	1737396000	0.535	31915	59654.2		0.962	65096.8	1644059700	0.54	32516	60214.8		62383.4	3128.24	1624117800	7.18531e+07	0.504333	0.0331981	29988.7	2233.58		0.834667	0.0895197	59389.4	568.656	1	0.834667
JW1655	ECK1659	b1663	mdtK	3	23	11	B	22	D		0.613	45133.7	1945699200	0.375	36801	98136		0.88	56449.4	2197318500	0.487	48920	100452		0.605	45837.1	2512919700	0.387	56814	146806		49140.1	3660.31	2218645800	1.64089e+08	0.416333	0.0355027	47511.7	5820.01		0.699333	0.0903628	115131	15851.5	0.946387	0.66184
JW2532	ECK2545	b2548	yphF	3	21	12	B	23	D		0.636	47677.9	2269267200	0.386	44351	114899		1.062	65441.5	1901328300	0.575	45228	78657.4		0.747	53136	2267594100	0.461	55239	119824		55418.5	5253.38	2146063200	1.22368e+08	0.474	0.0549454	48272.7	3492.36		0.815	0.127589	104460	12979.5	0.861677	0.702267
JW1747	ECK1756	b1758	ynjF	3	23	12	B	24	D		0.697	46876.2	2678825700	0.395	56670	143468		1.116	60790.6	2312462700	0.547	58308	106596		0.988	52753.8	2577472200	0.493	70073	142136		53473.5	4032.82	2522920200	1.09221e+08	0.478333	0.0444872	61683.7	4221.23		0.933667	0.123968	130733	12074.8	0.740584	0.691459
JW2092	ECK2098	b2105	yohL	3	19	1	C	2	E		0.67	53869.4	1239708600	0.453	22733	50183.2		1.346	89261.1	221238000	0.665	4659	7006.02		0.711	52070.6	1305053100	0.448	29280	65357.1		65067	12108.2	921999900	3.50888e+08	0.522	0.0715146	18890.7	7362.54		0.909	0.21882	40848.8	17479.2	0.861677	0.783264
JW1419	ECK1417	b1423	ydcJ	3	17	2	C	3	E		0.552	43150.8	1719933300	0.357	30818	86324.9		0.718	53169.2	1959368400	0.427	36374	85185		0.529	42238.3	2102836500	0.347	39052	112542		46186.1	3501.49	1927379400	1.11686e+08	0.377	0.0251661	35414.7	2424.87		0.599667	0.059538	94683.9	8935	0.946387	0.567517
JW0153	ECK0156	b0157	yadS	3	19	2	C	4	E		0.61	57571.7	543758400	0.46	10419	22650		0.808	68636.8	671661900	0.504	13674	27131		0.714	58563.4	719203500	0.439	14512	33056.9		61590.6	3534.69	644874600	5.23877e+07	0.467667	0.0191514	12868.3	1248.33		0.710667	0.057182	27612.6	3013.87	1	0.710667
JW1781	ECK1790	b1792	yeaO	3	17	3	C	5	E		0.57	49500.8	1105685100	0.385	21099	54802.6		0.788	62763.7	1208232900	0.466	25030	53712.4		0.695	54094.1	1118297700	0.413	23621	57193.7		55452.8	3888.47	1144071900	3.22865e+07	0.421333	0.023751	23250	1149.84		0.684333	0.0631568	55236.2	1028.08	1	0.684333
JW0858	ECK0865	b0874	ybjE	3	19	3	C	6	E		0.572	51711.5	336657600	0.398	6031	15153.3		0.696	62184.2	340829100	0.459	6791	14795.2		0.67	53669.3	304609500	0.413	6451	15619.9		55855	3214.65	327365400	1.14415e+07	0.423333	0.0183515	6424.33	219.798		0.646	0.0377536	15189.4	238.742	1	0.646
JW2265	ECK2264	b2270	yfbK	3	17	4	C	7	E		0.523	41912.6	1908103500	0.355	35763	100741		0.687	49659.6	2426178600	0.399	47997	120293		0.717	47553.9	1913138100	0.403	43520	107990		46375.3	2312.71	2082473400	1.71859e+08	0.385667	0.0153768	42426.7	3573.71		0.642333	0.0602919	109675	5706.79	1	0.642333
JW1821	ECK1831	b1832	yebR	3	19	4	C	8	E		0.513	45411.4	1987351200	0.37	37339	100916		0.707	56044.1	2187296100	0.414	44394	107232		0.746	52500.2	1983020400	0.406	46431	114362		51318.6	3125.74	2052555900	6.73817e+07	0.396667	0.0135319	42721.3	2754.66		0.655333	0.0720517	107503	3883.86	1	0.655333
JW0218	ECK0229	b0228	yafM	3	19	5	C	10	E		0.663	62739.4	286462800	0.482	5077	10533.2		0.82	70074.7	291909600	0.514	5520	10739.3		0.898	63039.5	246155400	0.501	5453	10884.2		65284.5	2396.66	274842600	1.44295e+07	0.499	0.00929157	5350	137.863		0.793667	0.0691046	10718.9	101.847	1	0.793667
JW2763	ECK2786	b2792	yqcC	3	17	6	C	11	E		0.482	40276.9	1521694800	0.332	26096	78602.4		0.609	47354.5	2080642500	0.39	37679	96612.8		0.92	53962.5	1713895200	0.453	36261	80046.4		47198	3951.46	1772077500	1.63956e+08	0.391667	0.0349396	33345.3	3647.71		0.670333	0.130106	85087.2	5777.87	1	0.670333
JW0577	ECK0578	b4511	ybdZ	3	19	6	C	12	E		0.388	38240.7	1214596800	0.306	20770	67875.8		0.572	48658.5	1438326900	0.378	25892	68497.4		0.727	49579.7	1130724900	0.417	24836	59558.8		45493	3635.87	1261216200	9.18055e+07	0.367	0.0325115	23832.7	1561.38		0.562333	0.0979802	65310.6	2881.54	1	0.562333
JW0851	ECK0858	b0867	ybjR	3	19	7	C	14	E		0.676	57914.2	312212700	0.466	5774	12390.6		0.873	65308.9	356372100	0.48	6933	14443.8		1.047	67611.4	302845500	0.511	6455	12632.1		63611.5	2925.17	323810100	1.6504e+07	0.485667	0.0132958	6387.33	336.281		0.865333	0.107167	13155.5	647.904	1	0.865333
JW0206	ECK0217	b0217	yafT	3	17	8	C	15	E		1.272	85258.1	226409400	0.64	3742	5846.88		0.882	71431.5	248162400	0.566	4675	8259.72		0.872	63213.1	232890300	0.497	4624	9303.82		73300.9	6432.11	235820700	6.44822e+06	0.567667	0.041289	4347	302.858		1.00867	0.131698	7803.47	1023.68	1	1.00867
JW0947	ECK0955	b0964	yccT	3	19	8	C	16	E		0.512	39888.8	2521005300	0.342	42265	123582		0.579	46598.4	3256036200	0.373	59579	159729		0.476	41961.9	2897383500	0.329	55445	168526		42816.4	1983.45	2891475000	2.12206e+08	0.348	0.0130512	52429.7	5220.56		0.522333	0.0301791	150612	13751.7	1	0.522333
JW2455	ECK2466	b2471	yffB	3	17	10	C	19	E		0.524	40462.7	2005503300	0.327	35361	108138		0.627	49585.5	2049908400	0.399	38727	97060.2		0.548	44248	2057825700	0.356	43175	121278		44765.4	2646.19	2037745800	1.62825e+07	0.360667	0.0209152	39087.7	2262.9		0.566333	0.0311145	108825	6999.57	1	0.566333
JW0348	ECK0354	b0357	frmR	3	17	11	C	21	E		0.778	61781.6	234274500	0.497	3983	8014.08		0.956	65696.3	185421600	0.495	3942	7963.64		0.971	64863.1	419630400	0.522	9554	18302.7		64113.7	1190.59	279775500	7.13353e+07	0.504667	0.00868588	5826.33	1863.87		0.901667	0.0619848	11426.8	3437.97	1	0.901667
JW1767	ECK1776	b1778	yeaA	3	19	11	C	22	E		0.598	38681.5	1554928200	0.383	25573	66770.2		0.958	69432.6	150220800	0.538	3282	6100.37		0.672	46671	2339379000	0.421	49702	118057		51595	9212.16	1348176000	6.40355e+08	0.447333	0.0466417	26185.7	13403.8		0.742667	0.109765	63642.5	32356.9	0.946387	0.70285
JW0154	ECK0157	b0158	btuF	3	19	12	C	24	E		0.874	39806.3	680478300	0.462	10277	22244.6		1.696	91441.5	203913900	0.773	4959	6415.27		1.025	52256.4	2452175100	0.507	70738	139523		61168.1	15557.6	1112189100	6.83971e+08	0.580667	0.0970401	28658	21095.9		1.19833	0.252622	56060.8	41980.4	0.740584	0.887466
JW0182	ECK0186	b0187	yaeR	3	21	1	C	1	F		0.712	47404.6	1865848500	0.412	36946	89674.8		1.218	67020	1733956200	0.612	43263	70691.2		0.835	49039	2329335900	0.448	55298	123433		54487.9	6283.81	1976380200	1.80538e+08	0.490667	0.0615503	45169	5382.8		0.921667	0.152362	94599.7	15423.1	0.740584	0.682572
JW2642	ECK2661	b2667	ygaV	3	23	1	C	2	F		0.644	46236.7	1638640800	0.391	31006	79299.2		1.212	65226.5	1230398100	0.581	26524	45652.3		0.725	51649.5	1827801900	0.447	37287	83416.1		54370.9	5648.24	1565613600	1.76279e+08	0.473	0.0563678	31605.7	3121.44		0.860333	0.177381	69455.9	11961	0.861677	0.741329
JW1318	ECK1321	b1325	ycjG	3	21	2	C	3	F		0.657	48226	1683084600	0.44	28475	64715.9		0.927	61740.5	2325776400	0.53	37809	71337.7		0.679	49845.4	2347566300	0.44	39331	89388.6		53270.6	4260.68	2118809100	2.17953e+08	0.47	0.03	35205	3393.56		0.754333	0.0865666	75147.4	7372.72	0.946387	0.713891
JW0433	ECK0437	b0443	ybaW	3	21	3	C	5	F		0.519	37842	2360415600	0.323	44270	137059		0.621	48328	2522134800	0.381	46486	122010		0.59	44480.5	2245937400	0.37	44178	119400		43550.2	3062.58	2376162600	8.01191e+07	0.358	0.0177858	44978	754.468		0.576667	0.0301901	126156	5503.03	1	0.576667
JW0910	ECK0918	b0927	ycbL	3	23	3	C	6	F		0.51	39878.6	1402985700	0.329	21970	66778.1		0.703	52334.5	1701946800	0.41	28539	69607.3		0.703	51421.6	1501915500	0.413	26516	64203.4		47878.2	4008.5	1535616000	8.79322e+07	0.384	0.0275136	25675	1942.37		0.638667	0.0643333	66862.9	1560.56	1	0.638667
JW0997	ECK1003	b1012	ycdM	3	21	4	C	7	F		0.323	30611.6	2927172600	0.264	49599	187875		0.6	42969.3	2671092000	0.366	56483	154325		0.673	42409.5	2362060800	0.374	51317	137211		38663.5	4029.18	2653441800	1.63372e+08	0.334667	0.0354087	52466.3	2068.66		0.532	0.106604	159804	14879.7	1	0.532
JW2706	ECK2731	b2736	ygbJ	3	23	4	C	8	F		0.531	42868.8	1701804600	0.352	30199	85792.6		0.698	53066.5	1827014400	0.414	33237	80282.6		0.764	51525.8	1708581600	0.42	35667	84921.4		49153.7	3173.77	1745800200	4.06542e+07	0.395333	0.0217358	33034.3	1581.72		0.664333	0.0693357	83665.6	1710.06	1	0.664333
JW2657	ECK2676	b2682	ygaZ	3	21	5	C	9	F		0.488	39601.6	1970449200	0.339	34982	103192		0.776	53226.9	2084398200	0.437	38893	89000		0.9	52865	1743101100	0.458	38655	84399.6		48564.5	4482.66	1932649500	1.0032e+08	0.411333	0.0366712	37510	1265.87		0.721333	0.122035	92197.1	5655.46	1	0.721333
JW1593	ECK1596	b1601	ydgG	3	23	5	C	10	F		0.51	41819.2	1648328400	0.348	29080	83563.2		0.696	49552.4	1880011800	0.402	34471	85748.8		0.871	53876.8	1667557800	0.452	36364	80451.3		48416.1	3526.78	1731966000	7.42307e+07	0.400667	0.0300296	33305	2182.04		0.692333	0.104228	83254.4	1537.01	1	0.692333
JW0888	ECK0896	b0905	ycaO	3	21	6	C	11	F		0.573	46920.3	1563081300	0.388	27807	71667.5		0.755	56769.6	1752204600	0.477	31890	66855.3		0.858	54562.3	1680817500	0.481	37294	77534.3		52750.7	2984.03	1665367800	5.5139e+07	0.448667	0.0303553	32330.3	2747.5		0.728667	0.0833193	72019.1	3087.76	1	0.728667
JW2052	ECK2061	b2067	yegE	3	21	7	C	13	F		0.555	43279	2486705400	0.373	48312	129523		0.713	52916	2624082300	0.43	51859	120602		0.704	48394.1	2291889600	0.423	52677	124532		48196.4	2783.72	2467559100	9.63724e+07	0.408667	0.0179475	50949.3	1339.64		0.657333	0.0512326	124886	2581.18	1	0.657333
JW1168	ECK1167	b1179	ycgL	3	23	7	C	14	F		0.781	54807.6	1790191800	0.492	40073	81449.2		0.65	52782.3	1900269900	0.42	35811	85264.3		0.609	45080.6	1998711900	0.371	42873	115561		50890.2	2963.02	1896391200	6.02258e+07	0.427667	0.0351394	39585.7	2053.13		0.68	0.0518684	94091.4	10791	1	0.68
JW1291	ECK1293	b1298	puuD	3	23	8	C	16	F		0.403	39452	1948797000	0.319	33951	106429		0.619	49456	1955844000	0.42	35012	83361.9		0.556	41912.4	1993247100	0.362	38992	107713		43606.8	3009.6	1965962700	1.3793e+07	0.367	0.0292632	35985	1534.38		0.526	0.0641327	99168	7911.74	1	0.526
JW1338	ECK1341	b1344	ydaO	3	23	9	C	18	F		0.445	40427.1	1816940700	0.334	30791	92188.6		0.467	44672.8	1813927500	0.392	28444	72561.2		0.465	41480.6	1529535600	0.358	27332	76346.4		42193.5	1276.43	1720134600	9.53035e+07	0.361333	0.0168259	28855.7	1019.52		0.459	0.00702377	80365.4	6011.74	1	0.459
JW2301	ECK2298	b2304	yfcH	3	21	10	C	19	F		0.597	45822.8	2369350800	0.376	43605	115971		0.742	54122.1	2542533300	0.448	53081	118484		0.636	47005.1	2645624700	0.403	57914	143707		48983.3	2591.97	2519169600	8.06044e+07	0.409	0.021	51533.3	4202.51		0.658333	0.0433218	126054	8856.32	1	0.658333
JW1486	ECK1485	b1491	yddW	3	23	10	C	20	F		0.525	47277	1760364000	0.377	32405	85954.9		0.733	55355.1	2005612200	0.467	38973	83454		0.842	52301	1852775100	0.447	41076	91892.6		51644.4	2354.95	1872917100	7.15098e+07	0.430333	0.0272845	37484.7	2611.38		0.7	0.0929857	87100.5	2502.47	1	0.7
JW2420	ECK2422	b2427	yfeT	3	21	11	C	21	F		0.625	43728.4	1870925400	0.36	35297	98047.2		0.796	56422.1	1770040800	0.464	35134	75719.8		0.715	47757.4	1910143800	0.422	43332	102682		49302.6	3744.92	1850370000	4.17297e+07	0.415333	0.0302067	37921	2705.91		0.712	0.0493862	92149.8	8323.27	1	0.712
JW1664	ECK1670	b1674	ydhY	3	23	11	C	22	F		0.632	43943.3	1906152300	0.362	38819	107235		0.788	54071.7	1943486100	0.464	45486	98030.2		0.733	47648.4	1995521400	0.426	49562	116343		48554.5	2958.71	1948386600	2.59147e+07	0.417333	0.029762	44622.3	3131.16		0.717667	0.0456813	107203	5286.4	0.946387	0.67919
JW1757	ECK1766	b1768	pncA	3	23	12	C	24	F		0.902	52352.3	2186212500	0.472	47858	101394		1.217	62391	1931832900	0.588	47765	81233		0.931	51937.8	2542194000	0.49	65440	133551		55560.4	3417.4	2220079800	1.77008e+08	0.516667	0.0360432	53687.7	5876.23		1.01667	0.100516	105393	15234.7	0.740584	0.752927
JW2129	ECK2134	b2141	yohJ	3	19	1	D	2	G		0.638	47514.3	1454353200	0.421	27096	64361		1.544	87399.9	122319000	0.66	2658	4027.27		0.745	44978.3	2305269900	0.449	47912	106708		59964.2	13737.4	1293980700	6.35245e+08	0.51	0.0754343	25888.7	13077.6		0.975667	0.28584	58365.5	29792.6	0.861677	0.84071
JW5961	ECK1425	b4531	yncK	3	17	2	D	3	G		0.556	46053.9	1007122500	0.376	19584	52085.1		0.974	62850.2	1009312200	0.516	23006	44585.3		0.563	47212	1348705800	0.385	27704	71958.4		52038.7	5416.09	1121713500	1.13498e+08	0.425667	0.0452413	23431.3	2353.67		0.697667	0.138181	56209.6	8166.62	0.946387	0.660263
JW0215	ECK0226	b0225	yafQ	3	19	2	D	4	G		0.611	56770.1	265814100	0.454	4849	10680.6		0.885	72462.3	249243300	0.527	4715	8946.87		0.763	61200.8	272619000	0.461	5368	11644.3		63477.8	4670.82	262558800	6.94151e+06	0.480667	0.0232546	4977.33	199.127		0.753	0.0792549	10423.9	789.175	1	0.753
JW1938	ECK1953	b1955	yedP	3	17	3	D	5	G		0.517	38383.6	2285687700	0.337	44524	132119		0.694	49184.7	2479528800	0.405	46124	113886		0.656	43222.9	2096836200	0.38	42766	112542		43597.1	3123.64	2287350900	1.10477e+08	0.374	0.0198578	44471.3	969.729		0.622333	0.0537969	119516	6313.42	1	0.622333
JW0865	ECK0872	b0881	clpS	3	19	3	D	6	G		0.477	43745.2	1794996900	0.352	31304	88931.8		0.583	54276.2	2157732900	0.421	38079	90448.9		0.606	49814	1863935100	0.378	36348	96158.7		49278.5	3051.8	1938888300	1.11217e+08	0.383667	0.0201191	35243.7	2032.23		0.555333	0.0397254	91846.5	2200.15	1	0.555333
JW2292	ECK2289	b2295	yfbV	3	17	4	D	7	G		0.547	39259.4	1917565200	0.329	33737	102544		0.716	49164.8	1976904900	0.401	36497	91015		0.811	49234.9	1737732600	0.423	37538	88742.3		45886.4	3313.53	1877400900	7.19044e+07	0.384333	0.0283862	35924	1134.04		0.691333	0.0772018	94100.5	4272.48	1	0.691333
JW2145	ECK2151	b2158	yeiH	3	19	4	D	8	G		0.617	45100.8	2274389100	0.363	51042	140612		0.703	56321.3	2766065400	0.436	61640	141376		0.874	56573.6	2226707100	0.463	58671	126719		52665.2	3782.91	2422387200	1.7239e+08	0.420667	0.0298682	57117.7	3156.42		0.731333	0.07553	136236	4763.33	1	0.731333
JW2424	ECK2426	b2431	yfeX	3	17	5	D	9	G		0.51	38686.1	1933250400	0.328	36947	112643		0.641	46085.7	2127309300	0.385	41626	108119		0.705	44341.6	2001290400	0.391	45969	117568		43037.8	2233.35	2020616700	5.68473e+07	0.368	0.0200749	41514	2605.03		0.618667	0.0573885	112777	2728.31	1	0.618667
JW0224	ECK0235	b0234	yafP	3	19	5	D	10	G		0.566	48755.2	468539100	0.379	8762	23118.7		0.701	60346	605806200	0.456	12016	26350.9		0.708	53343.7	499253400	0.412	11126	27004.9		54148.3	3370.08	524532900	4.15927e+07	0.415667	0.0223035	10634.7	970.942		0.658333	0.0462109	25491.5	1201.3	1	0.658333
JW2777	ECK2801	b2806	ygdE	3	17	6	D	11	G		0.622	56263.1	261125100	0.438	4505	10285.4		0.669	64141.1	290397600	0.483	5244	10857.1		1.046	74332.4	253418400	0.565	5257	9304.42		64912.2	5230.41	268313700	1.12638e+07	0.495333	0.0371768	5002	248.528		0.779	0.134188	10149	453.39	1	0.779
JW0132	ECK0135	b0136	yadK	3	17	7	D	13	G		0.555	47022.2	1890569700	0.382	32047	83892.7		0.637	52084.4	2240564400	0.4	36509	91272.5		0.699	49379.5	1910391300	0.418	34764	83167.5		49495.4	1462.49	2013841800	1.13506e+08	0.4	0.0103923	34440	1298.22		0.630333	0.0417027	86110.9	2589.29	1	0.630333
JW0861	ECK0868	b0877	ybjX	3	19	7	D	14	G		0.456	40976.8	2052482400	0.329	38050	115653		0.55	47586.8	2093194800	0.375	37093	98914.7		0.613	45776.5	2024124300	0.377	40846	108345		44780	1972.11	2056600500	2.0045e+07	0.360333	0.0156773	38663	1125.92		0.539667	0.0456155	107638	4845	1	0.539667
JW0214	ECK0225	b0224	yafK	3	17	8	D	15	G		0.592	53592.3	516318300	0.412	9492	23038.8		0.741	60684.4	579808800	0.445	11604	26076.4		0.703	51476.1	590697900	0.389	12624	32452.4		55250.9	2784.56	562275000	2.31924e+07	0.415333	0.0162515	11240	922.267		0.678667	0.0447002	27189.2	2773.85	1	0.678667
JW1003	ECK1008	b1018	ycdO	3	19	8	D	16	G		0.597	46152.4	1427320800	0.377	26676	70758.6		0.79	57204.1	1398534300	0.471	29028	61630.6		0.723	50474.7	1340158500	0.416	29346	70543.3		51277.1	3215.46	1388671200	2.56403e+07	0.421333	0.0272662	28350	842.019		0.703333	0.0565754	67644.2	3007.43	1	0.703333
JW0995	ECK1001	b1010	ycdK	3	19	9	D	18	G		0.485	39027.9	2084074200	0.33	37099	112421		0.676	47547.4	2127982500	0.394	41340	104924		0.583	42023.9	2214745200	0.359	46585	129763		42866.4	2495.18	2142267300	3.83917e+07	0.361	0.0185023	41674.7	2743.48		0.581333	0.0551432	115703	7355.84	1	0.581333
JW2459	ECK2470	b2474	ypfI	3	17	10	D	19	G		0.641	53969.3	860465700	0.41	15514	37839		0.897	65088.6	830142000	0.493	17468	35432		0.849	55454.1	858114000	0.439	19565	44567.2		58170.7	3485.43	849573900	9.73964e+06	0.447333	0.0243196	17515.7	1169.67		0.795667	0.0785649	39279.4	2733.67	1	0.795667
JW0378	ECK0382	b0387	yaiI	3	17	11	D	21	G		0.559	45109.1	1517267700	0.359	26416	73582.2		0.749	55498.7	1625037300	0.456	30230	66293.9		0.67	48492.9	1744819200	0.416	36327	87324.5		49700.2	3059.37	1629041400	6.5719e+07	0.410333	0.0281445	30991	2886.25		0.659333	0.055107	75733.5	6165.59	1	0.659333
JW2512	ECK2525	b2528	iscA	3	19	11	D	22	G		1.043	91721.9	265137300	0.712	5113	7181.18		1.207	95624.2	417740400	0.724	8574	11842.5		1.345	93454.3	358092000	0.712	7571	10633.4		93600.1	1128.86	346989900	4.44011e+07	0.716	0.004	7086	1028.11		1.19833	0.0872875	9885.72	1396.59	0.946387	1.13409
JW0276	ECK0281	b0282	yagP	3	19	12	D	24	G		0.67	41331	1289220300	0.383	27869	72765		1.626	81048.5	125787600	0.681	2765	4060.21		1.006	47697	2238506100	0.498	62465	125432		56692.2	12316	1217838000	6.10933e+08	0.520667	0.0867685	31033	17306.4		1.10067	0.280003	67419	35138.8	0.740584	0.815136
JW0385	ECK0389	b0394	mak	3	21	1	D	1	H		0.766	51237.7	1301252400	0.423	25955	61359.3		1.195	63804.2	1389321000	0.58	36703	63281		0.798	50407.6	2011419900	0.435	49294	113320		55149.8	4333.8	1567331100	2.23495e+08	0.479333	0.0504524	37317.3	6744.39		0.919667	0.137976	79320	17008.8	0.740584	0.68109
JW2643	ECK2662	b2668	ygaP	3	23	1	D	2	H		0.608	44519.6	1801936800	0.382	34038	89104.7		1.645	71954.5	906288300	0.652	25916	39748.5		1.008	56248.1	1558076400	0.514	39473	76795.7		57574.1	7947.47	1422100500	2.67341e+08	0.516	0.0779487	33142.3	3939.11		1.087	0.301951	68549.6	14832.5	0.861677	0.936643
JW2241	ECK2240	b2247	yfaW	3	21	2	D	3	H		0.64	47610.5	1938731400	0.398	34967	87856.8		1.129	73273.8	1663460100	0.589	31778	53952.5		0.765	53091.4	1845907200	0.445	34384	77267.4		57991.9	7803.02	1816032900	8.08557e+07	0.477333	0.0574582	33709.7	980.387		0.844667	0.146675	73025.6	10014.5	0.946387	0.799382
JW0726	ECK0725	b0736	ybgC	3	21	3	D	5	H		0.395	32405.9	2446655400	0.289	44085	152543		0.617	45946.1	2342988000	0.397	48712	122700		0.483	34853.9	2670956100	0.314	52684	167783		37735.3	4165.76	2486866500	9.67875e+07	0.333333	0.0326411	48493.7	2484.72		0.498333	0.0645428	147676	13240	1	0.498333
JW1002	ECK1007	b1017	ycdN	3	21	4	D	7	H		0.585	43163.7	1919493000	0.366	36873	100746		0.705	53960.7	1905021000	0.448	35531	79310.3		0.727	50481.4	1926425700	0.431	40807	94679.8		49201.9	3181.78	1916979900	6.30548e+06	0.415	0.0249867	37737	1583.13		0.672333	0.0441261	91578.7	6379.25	1	0.672333
JW0236	ECK0249	b0247	ykfG	3	21	5	D	9	H		0.529	39756.5	1953943200	0.336	35550	105804		0.633	50060	2059296300	0.415	36974	89094		0.661	46481.5	1914288300	0.399	41296	103499		45432.7	3020.23	1975842600	4.32686e+07	0.383333	0.0241132	37940	1727.62		0.607667	0.0401553	99465.4	5228.24	1	0.607667
JW0977	ECK0983	b0992	yccM	3	23	5	D	10	H		0.568	38552	1620394200	0.351	26551	75643.9		0.637	43499.5	3285524700	0.379	54456	143683		0.746	43150.9	2438739900	0.397	41639	104884		41734.2	1594.24	2448219600	4.80705e+08	0.375667	0.0133832	40882	8064.37		0.650333	0.0518148	108070	19705.8	1	0.650333
JW1032	ECK1031	b1045	ymdB	3	21	6	D	11	H		0.553	38903	1732184100	0.334	30139	90236.5		0.703	49957.1	2035560600	0.408	35617	87296.6		0.795	47886.2	1804659300	0.419	38023	90747		45582.1	3392.63	1857468000	9.14711e+07	0.387	0.0266896	34593	2332.79		0.683667	0.070525	89426.7	1075.21	1	0.683667
JW1120	ECK1120	b1134	ymfB	3	23	6	D	12	H		0.627	45377.8	1589711400	0.385	29387	76329.9		0.73	51446.6	2003193000	0.432	39045	90381.9		0.712	46680.4	1785962700	0.412	40203	97580.1		47834.9	1844.57	1792955700	1.19413e+08	0.409667	0.0136178	36211.7	3428.67		0.689667	0.0317613	88097.3	6239.86	1	0.689667
JW1193	ECK1190	b1202	ycgV	3	23	7	D	14	H		0.568	44365.5	1834459200	0.371	33588	90533.7		0.716	53489.6	1824933600	0.46	34758	75560.9		0.695	48159.2	1858366800	0.422	39930	94620.9		48671.4	2646.33	1839253200	9.94454e+06	0.417667	0.0257833	36092	1948.5		0.659667	0.0462325	86905.1	5793.55	1	0.659667
JW2147	ECK2153	b2160	yeiI	3	21	8	D	15	H		0.514	42888.1	1670068800	0.348	30205	86796		0.693	55084.7	1765113300	0.441	32973	74768.7		0.599	47050.1	1900785600	0.383	37954	99096.6		48340.9	3579.53	1778655900	6.69455e+07	0.390667	0.0271191	33710.7	2267.15		0.602	0.0516946	86887.1	7023.01	1	0.602
JW1292	ECK1294	b1299	puuR	3	23	8	D	16	H		0.514	45747.7	1900637100	0.371	34022	91703.5		0.6	50809.9	2553308100	0.406	48635	119791		0.625	48429.6	2602796400	0.4	52105	130262		48329.1	1462.18	2352247200	2.26257e+08	0.392333	0.0108064	44920.7	5540.64		0.579667	0.0336171	113919	11511.7	1	0.579667
JW2248	ECK2247	b2254	yfbF	3	21	9	D	17	H		0.609	48755.9	1491964200	0.392	26243	66946.4		0.738	59399.5	1699658100	0.47	31334	66668.1		0.801	56210.8	1644226200	0.453	33110	73090.5		54788.7	3153.74	1611949500	6.20901e+07	0.438333	0.0236807	30229	2057.89		0.716	0.0565066	68901.7	2095.96	1	0.716
JW5802	ECK1398	b1401	ydbA	3	23	9	D	18	H		0.661	55181.2	999021600	0.463	18080	39049.7		0.799	57949	1543950900	0.501	32053	63978		0.735	53627.8	2170557000	0.425	45854	107892		55586	1263.76	1571176500	3.38467e+08	0.463	0.0219393	31995.7	8017.71		0.731667	0.039872	70306.5	20123.3	1	0.731667
JW2319	ECK2316	b2322	yfcJ	3	21	10	D	19	H		0.398	36577	2158731000	0.304	38149	125490		0.634	48686.4	2357085600	0.406	44424	109419		0.72	46551.8	2099413800	0.4	44124	110310		43938.4	3731.93	2205076800	7.79094e+07	0.37	0.0330454	42232.3	2043.5		0.584	0.0962566	115073	5214.94	1	0.584
JW2427	ECK2429	b2434	ypeA	3	21	11	D	21	H		0.619	42119.8	2243455200	0.365	42087	115307		0.777	54835.3	2175378300	0.453	45503	100448		0.631	43125.4	2244176100	0.374	51531	137783		46693.5	4081.23	2221003200	2.28134e+07	0.397333	0.0279543	46373.7	2760.79		0.675667	0.0507849	117846	10852.3	1	0.675667
JW2542	ECK2556	b2558	yfhD	3	21	12	D	23	H		0.782	54648.9	1741185900	0.461	34735	75347.1		1.043	65353.7	1971804600	0.577	42358	73410.7		0.867	54919.6	2114028000	0.495	48561	98103		58307.4	3524.01	1942339500	1.08634e+08	0.511	0.0344287	41884.7	3998.23		0.897333	0.0768556	82286.9	7927.77	0.861677	0.773211
JW1205	ECK1202	b1214	ychA	3	17	1	E	1	I		0.789	49842.2	1495598400	0.423	31693	74924.3		1.431	66467.2	1426419900	0.606	36931	60942.2		0.913	51296.8	1817504100	0.453	46946	103634		55868.7	5315.87	1579840800	1.20498e+08	0.494	0.0566657	38523.3	4474.56		1.04433	0.196619	79833.4	12566	0.740584	0.773417
JW2130	ECK2135	b2142	yohK	3	19	1	E	2	I		0.618	52134.1	1160870400	0.423	21469	50754.1		1.532	91782.9	215142300	0.684	4679	6840.64		0.843	59405.9	902378700	0.508	21006	41350.4		67774.3	12186.5	759463800	2.82205e+08	0.538333	0.0768556	15718	5521.12		0.997667	0.274949	32981.7	13349.5	0.861677	0.859666
JW0277	ECK0282	b0283	yagQ	3	19	2	E	4	I		0.576	40908.6	2163900600	0.363	39375	108471		0.756	51545.1	2474756100	0.423	47529	112362		0.613	44444.3	2493855000	0.375	47634	127024		45632.7	3127.44	2377503900	1.06944e+08	0.387	0.0183303	44846	2735.67		0.648333	0.0548827	115952	5648.65	1	0.648333
JW1941	ECK1956	b1958	yedI	3	17	3	E	5	I		0.574	43242.2	1702313100	0.366	31898	87153		0.674	53454.8	1965708000	0.426	36801	86387.3		0.747	50783.3	1805458500	0.419	36300	86634.8		49160.1	3057.79	1824493200	7.66289e+07	0.403667	0.0189414	34999.7	1557.56		0.665	0.0501431	86725.1	225.589	1	0.665
JW2298	ECK2295	b2301	yfcF	3	17	4	E	7	I		0.497	37437	2092815900	0.318	38367	120651		0.672	49855.5	2571327000	0.413	46878	113506		0.751	48176.8	2294837100	0.409	45493	111230		45156.5	3890.01	2319660000	1.38691e+08	0.38	0.0310215	43579.3	2636.66		0.64	0.0750489	115129	2838.11	1	0.64
JW2371	ECK2370	b2374	frc	3	19	4	E	8	I		0.563	42372.3	2013695100	0.361	38588	106892		0.629	49063.1	2331173700	0.375	41590	110907		0.567	42461.3	2055400200	0.343	40949	119385		44632.2	2215.57	2133423000	9.96056e+07	0.359667	0.00926163	40375.7	912.786		0.586333	0.0213646	112394	3682.31	1	0.586333
JW2508	ECK2521	b2524	yfhJ	3	17	5	E	9	I		0.536	41755.2	1202502600	0.347	23061	66458.2		0.596	51410.5	1357851600	0.408	26224	64274.5		0.915	56762.6	1184572800	0.482	26905	55819.5		49976.1	4391.23	1248309000	5.50153e+07	0.412333	0.0390313	25396.7	1184.26		0.682333	0.117616	62184.1	3244.12	1	0.682333
JW0004	ECK0005	b0005	yaaX	3	17	6	E	11	I		0.509	42282.5	1489931100	0.344	26570	77238.4		0.71	54115.6	1748520900	0.436	31069	71259.2		0.986	62379.2	1311608700	0.512	28869	56384.8		52925.8	5831.82	1516686900	1.26833e+08	0.430667	0.0485707	28836	1298.85		0.735	0.138264	68294.1	6199.78	1	0.735
JW0133	ECK0136	b0137	yadL	3	17	7	E	13	I		1.157	66245.8	257045400	0.543	5078	9351.75		0.803	63467.2	372835800	0.488	7179	14711.1		1.003	61409.2	307935000	0.499	6918	13863.7		63707.4	1401.36	312605400	3.35073e+07	0.51	0.0168028	6391.67	661.141		0.987667	0.102478	12642.2	1663.3	1	0.987667
JW0889	ECK0897	b0906	ycaP	3	19	7	E	14	I		0.553	45186.9	1493760600	0.365	25932	71046.6		0.65	56608	1913562900	0.442	32227	72911.8		0.761	58478.3	1615564800	0.46	30596	66513		53424.4	4153.98	1674296100	1.24694e+08	0.422333	0.0291338	29585	1886.21		0.654667	0.0600897	70157.1	1899.93	1	0.654667
JW0223	ECK0234	b0233	yafO	3	17	8	E	15	I		0.512	43364.8	1495069200	0.351	26618	75834.8		0.592	52497.1	1661152500	0.407	28791	70739.6		0.625	49616.9	1622435400	0.376	31031	82529.3		48492.9	2695.5	1592885700	5.01691e+07	0.378	0.0161967	28813.3	1273.97		0.576333	0.0335476	76367.9	3413.81	1	0.576333
JW1853	ECK1865	b1864	yebC	3	19	8	E	16	I		0.616	51410.7	811750500	0.405	14858	36686.4		0.738	60094.9	1076881500	0.475	20406	42960		0.763	58197	824985000	0.452	16544	36601.8		56567.5	2635.98	904539000	8.62559e+07	0.444	0.0205994	17269.3	1642.12		0.705667	0.0454105	38749.4	2105.44	1	0.705667
JW2527	ECK2540	b2543	yphA	3	17	10	E	19	I		0.555	44345.9	1893521700	0.354	33054	93372.9		0.642	50888.3	1903451400	0.401	35181	87733.2		0.684	49885.5	1896154200	0.405	38687	95523.5		48373.2	2034.38	1897709100	2.97002e+06	0.386667	0.0163741	35640.7	1642.27		0.627	0.0379868	92209.8	2322.83	1	0.627
JW2708	ECK2733	b2738	ygbL	3	19	11	E	22	I		0.78	58172	408031200	0.45	7958	17684.4		0.907	62946.4	416146500	0.482	9117	18914.9		0.907	57032.3	379353600	0.462	8875	19210		59383.6	1811.53	401177100	1.11604e+07	0.464667	0.00933333	8650	352.982		0.864667	0.0423333	18603.1	467.163	0.946387	0.818309
JW1574	ECK1577	b1582	ynfA	3	17	12	E	23	I		0.569	40851.3	1578960900	0.387	32662	84397.9		1.039	67226.6	138535200	0.554	2931	5290.61		0.72	43696.1	1685156400	0.443	36208	81733.6		50591.3	8358.08	1134217500	4.98784e+08	0.461333	0.0490725	23933.7	10551.1		0.776	0.138536	57140.7	25936.5	0.861677	0.668661
JW0763	ECK0769	b0780	ybhK	3	19	12	E	24	I		0.833	46330.1	695423700	0.402	12794	31825.9		1.257	60038.3	1200286800	0.56	24663	44041.1		1.033	50057	775443600	0.477	17385	36446.5		52141.8	4092.2	890384700	1.56663e+08	0.479667	0.0456302	18280.7	3455.43		1.041	0.122464	37437.8	3560.89	0.740584	0.770948
JW0770	ECK0776	b0787	ybhM	3	21	1	E	1	J		0.836	43851.9	1571233500	0.414	31519	76132.9		1.236	53256.4	2981097000	0.549	64332	117180		0.853	46181.6	2265893100	0.443	58047	131032		47763.3	2827.7	2272741200	4.07007e+08	0.468667	0.0410298	51299.3	10055.2		0.975	0.130592	108115	16483.4	0.740584	0.722069
JW2655	ECK2674	b2680	ygaX	3	23	1	E	2	J		0.61	44450.9	2192103000	0.378	41513	109823		1.234	64097.9	1456493400	0.589	34131	57947.4		0.759	55141.8	1899045900	0.481	42080	87484.4		54563.6	5678.97	1849214100	2.13809e+08	0.482667	0.0609162	39241.3	2560.4		0.867667	0.188149	85084.8	15023.1	0.861677	0.747648
JW2501	ECK2513	b2517	yfgB	3	21	2	E	3	J		0.476	38610.5	2161855800	0.329	36984	112413		0.708	51411.2	2146199400	0.436	40907	93823.4		0.498	40805.6	2124984600	0.343	38859	113292		43609.1	3952.18	2144346600	1.0684e+07	0.369333	0.0335774	38916.7	1132.84		0.560667	0.0739399	106509	6348.09	0.946387	0.530608
JW2746	ECK2769	b2775	yqcE	3	23	2	E	4	J		0.679	48496.9	1638686700	0.412	29271	71046.1		0.749	56614.6	1882345500	0.476	34162	71768.9		0.63	47635.7	1916061300	0.398	35441	89047.7		50915.7	2860.25	1812364500	8.73826e+07	0.428667	0.0240093	32958	1880.11		0.686	0.0345302	77287.6	5883.78	1	0.686
JW1510	ECK1510	b1517	lsrF	3	21	3	E	5	J		0.522	43653.9	1940657400	0.357	35802	100286		0.621	52185.9	2384165700	0.42	43948	104638		0.671	49271.7	2045314800	0.405	41948	103575		48370.5	2503.86	2123379300	1.33847e+08	0.394	0.019	40566	2450.97		0.604667	0.043781	102833	1310.09	1	0.604667
JW1169	ECK1168	b1180	ycgM	3	23	3	E	6	J		0.564	45244	1642312800	0.367	28571	77850.1		0.644	53316.4	2032789500	0.411	32975	80231.1		0.702	54709.3	1756499400	0.427	30891	72344.3		51089.9	2950.47	1810533900	1.15913e+08	0.401667	0.0179382	30812.3	1271.93		0.636667	0.0400056	76808.5	2335.56	1	0.636667
JW1274	ECK1277	b1282	yciH	3	21	4	E	7	J		0.514	38502.1	2159188200	0.324	37975	117207		0.573	48707.2	2312949600	0.393	38657	98363.9		0.631	47376.9	1994945400	0.399	36161	90629.1		44862.1	3203.09	2155694400	9.18165e+07	0.372	0.0240624	37597.7	744.824		0.572667	0.0337754	102067	7892.53	1	0.572667
JW0247	ECK0259	b0257	insO	3	21	5	E	9	J		0.622	44849.4	1126839600	0.377	22452	59554.4		0.575	47931.5	2176665300	0.393	38124	97007.6		0.582	43377.9	2082047400	0.372	40306	108349		45386.3	1341.62	1795184100	3.35287e+08	0.380667	0.00633333	33627.3	5623.06		0.593	0.0146401	88303.8	14742.9	1	0.593
JW0994	ECK1000	b1009	rarA	3	23	5	E	10	J		0.593	48486.9	1474278300	0.397	26572	66932		0.708	57847.5	1834062300	0.476	32281	67817.2		0.885	59325.8	1535543100	0.504	34310	68075.4		55220.1	3393.54	1614627900	1.11133e+08	0.459	0.0320364	31054.3	2316.44		0.728667	0.0849241	67608.2	346.224	1	0.728667
JW1245	ECK1247	b1253	yciA	3	21	6	E	11	J		0.499	41915.5	1741199400	0.349	32322	92613.2		0.667	54756.7	2015269200	0.452	37893	83834.1		1.185	61546.5	1425539700	0.567	36054	63587.3		52739.6	5756.03	1727336100	1.70381e+08	0.456	0.062963	35423	1638.86		0.783667	0.206444	80011.5	8594.27	1	0.783667
JW2061	ECK2072	b2076	mdtC	3	21	7	E	13	J		0.507	42965.6	1527459300	0.363	28761	79231.4		0.675	54852.1	1821186000	0.463	33382	72099.4		0.966	57039.3	1490609700	0.525	34225	65190.5		51619	4372.55	1613085000	1.04593e+08	0.450333	0.0471923	32122.7	1698.36		0.716	0.134078	72173.7	4053.44	1	0.716
JW2161	ECK2167	b2173	yeiR	3	21	8	E	15	J		0.494	38127	2266458300	0.33	42916	130048		0.599	46083.1	2528099100	0.384	48209	125544		0.526	38361.1	2500172100	0.328	49908	152159		40857	2613.89	2431576500	8.29518e+07	0.347333	0.0183424	47011	2105.42		0.539667	0.0310716	135917	8224.16	1	0.539667
JW1303	ECK1305	b1310	ycjN	3	23	8	E	16	J		0.629	47557.4	1122876000	0.392	22376	57081.6		0.695	56340.5	1251092700	0.468	25455	54391		0.579	46756.9	1250620200	0.391	27028	69125.3		50218.3	3069.84	1208196300	4.26604e+07	0.417	0.0255016	24953	1366.17		0.634333	0.0335923	60199.3	4530.08	1	0.634333
JW2251	ECK2250	b2257	arnT	3	21	9	E	17	J		0.447	36221.9	1749696300	0.309	33351	107932		0.62	43255.5	1341811800	0.377	27705	73488.1		0.444	35162.5	2087632800	0.31	42835	138177		38213.3	2539.59	1726380300	2.15615e+08	0.332	0.0225019	34630.3	4414.25		0.503667	0.0581731	106533	18687.3	1	0.503667
JW1402	ECK1398	b1405	ydbA	3	23	9	E	18	J		0.628	46544.6	1208755800	0.383	24773	64681.5		0.629	50714.9	1381379400	0.413	29258	70842.6		0.541	43288.7	1312850700	0.36	29111	80863.9		46849.4	2149.16	1300995300	5.01835e+07	0.385333	0.0153442	27714	1471.11		0.599333	0.0291681	72129.3	4715.56	1	0.599333
JW2347	ECK2345	b2351	yfdH	3	21	10	E	19	J		0.604	43173.5	1915908300	0.364	34050	93544		0.737	53219.6	2198340900	0.435	42766	98312.6		0.75	48300.3	1989429300	0.416	44207	106267		48231.2	2900.26	2034559500	8.45963e+07	0.405	0.0212211	40341	3172.89		0.697	0.0466512	99374.5	3710.95	1	0.697
JW1527	ECK1527	b1534	ydeE	3	23	10	E	20	J		0.888	68602.9	1269571500	0.54	24352	45096.3		1.013	72728.2	1216274400	0.565	24520	43398.2		1.069	67657.6	1146093300	0.54	25186	46640.7		69662.9	1556.76	1210646400	3.5756e+07	0.548333	0.00833333	24686	254.661		0.99	0.0535008	45045.1	936.382	1	0.99
JW2451	ECK2462	b2467	yffH	3	21	11	E	21	J		0.814	58841.6	1071417600	0.454	21025	46310.6		0.85	65521.8	1355175000	0.488	29106	59643.4		0.964	61521.4	1096617600	0.475	26311	55391.6		61961.6	1940.92	1174403400	9.06781e+07	0.472333	0.00990511	25480.7	2369.44		0.876	0.0452106	53781.9	3932.12	1	0.876
JW1680	ECK1688	b1690	ydiM	3	23	11	E	22	J		0.75	66590.4	269914500	0.543	4684	8626.15		0.824	66768	366993900	0.529	7150	13516.1		0.88	60090.8	226200600	0.475	4355	9168.42		64483.1	2196.72	287703000	4.16053e+07	0.515667	0.0207311	5396.33	881.962		0.818	0.0376475	10436.9	1547.53	0.946387	0.774145
JW2545	ECK2559	b2561	yfhH	3	21	12	E	23	J		0.738	50626.6	1671817500	0.428	31459	73502.3		0.991	60106.4	1713160800	0.519	36603	70526		0.825	51560.9	1725727500	0.471	41284	87651.8		54098	3016.3	1703568600	1.62848e+07	0.472667	0.0262827	36448.7	2837.28		0.851333	0.0742122	77226.7	5282.88	0.861677	0.733574
JW1774	ECK1783	b1785	yeaI	3	23	12	E	24	J		0.894	54561.1	1834805700	0.488	41178	84381.1		1.3	64392	1858439700	0.601	44730	74426		0.892	51355	2130824700	0.482	54528	113129		56769.4	3922.1	1941356700	9.49794e+07	0.523667	0.0387054	46812	3991.94		1.02867	0.135668	90645.2	11603.2	0.740584	0.761814
JW1240	ECK1242	b1248	yciU	3	17	1	F	1	K		0.772	50542.8	1954439100	0.43	41897	97434.9		1.33	71635.6	1917058500	0.643	48978	76171.1		0.944	55855	2125093500	0.511	54992	107616		59344.5	6334	1998863700	6.40307e+07	0.528	0.0620725	48622.3	3784.38		1.01533	0.164982	93740.8	9263.5	0.740584	0.75194
JW2148	ECK2154	b2161	yeiJ	3	19	1	F	2	K		0.638	39183.8	1926738900	0.407	32085	78832.9		1.418	85084.6	158787900	0.669	3460	5171.9		0.719	46423.4	2332161900	0.458	47579	103884		56897.2	14247.8	1472562900	6.67232e+08	0.511333	0.0801963	27708	12922.7		0.925	0.247607	62629.7	29625.1	0.861677	0.797051
JW1958	ECK1972	b1976	yeeI	3	17	3	F	5	K		0.634	39415.6	1972378800	0.372	29909	80400.5		0.634	49190.4	3559140000	0.404	58160	143960		0.646	43162.2	3378037500	0.375	52541	140109		43922.7	2847.25	2969852100	5.01469e+08	0.383667	0.0102035	46870	8634.23		0.638	0.004	121490	20574.8	1	0.638
JW1483	ECK1482	b1488	ddpX	3	19	3	F	6	K		0.671	53807.9	823799700	0.417	16289	39062.4		0.709	65240.9	841085100	0.471	15715	33365.2		0.672	55728.7	767448000	0.418	15058	36023.9		58259.2	3534.62	810777600	2.2232e+07	0.435333	0.0178357	15687.3	355.628		0.684	0.0125033	36150.5	1645.85	1	0.684
JW2641	ECK2660	b2666	yqaE	3	19	4	F	8	K		0.679	50870.7	337492800	0.413	6506	15753		0.777	65379.6	431694900	0.518	8114	15664.1		0.812	61166.7	390846600	0.489	7833	16018.4		59139	4309.32	386678100	2.72736e+07	0.473333	0.0313067	7484.33	495.847		0.756	0.0398037	15811.8	106.425	1	0.756
JW2599	ECK2614	b2618	yfjF	3	17	5	F	9	K		0.672	44053.7	536599800	0.4	9826	24565		0.682	58266.2	839696400	0.478	15218	31836.8		0.706	52963.9	766980900	0.445	14322	32184.3		51761.3	4146.61	714425700	9.13572e+07	0.441	0.0226053	13122	1668.17		0.686667	0.0100885	29528.7	2483.87	1	0.686667
JW0384	ECK0388	b0393	rdgC	3	19	5	F	10	K		0.883	77777.6	194903100	0.642	3524	5489.1		0.786	69021.2	259448400	0.517	4743	9174.08		0.83	66677.3	223460100	0.518	4594	8868.73		71158.7	3377.92	225937200	1.86737e+07	0.559	0.041501	4287	383.917		0.833	0.0280416	7843.97	1180.73	1	0.833
JW0012	ECK0013	b0013	yaaI	3	17	6	F	11	K		0.532	41258.3	1697663700	0.343	30051	87612.2		0.556	47503.7	1723846500	0.368	31322	85114.1		0.756	53250.8	1439407800	0.447	31892	71346.8		47337.6	3462.93	1620306000	9.07644e+07	0.386	0.0313422	31088.3	544.142		0.614667	0.0710055	81357.7	5057.16	1	0.614667
JW0732	ECK0731	b0742	ybgF	3	19	6	F	12	K		0.501	38651.9	2473474500	0.328	44166	134652		0.562	47211.6	2689345800	0.373	48058	128842		0.599	43389.4	2533562100	0.368	51575	140149		43084.3	2475.66	2565460800	6.43253e+07	0.356333	0.01424	47933	2139.71		0.554	0.0285715	134548	3264.65	1	0.554
JW0159	ECK0162	b0163	yaeH	3	17	7	F	13	K		0.618	52208.5	1376393400	0.418	26287	62887.6		0.709	61277.5	1420043400	0.462	28541	61777.1		0.665	53392.4	1511631900	0.43	33333	77518.6		55626.1	2846.28	1436022900	3.98492e+07	0.436667	0.0131318	29387	2077.52		0.664	0.0262742	67394.4	5072.24	1	0.664
JW0900	ECK0908	b0917	ycaR	3	19	7	F	14	K		0.598	47271.9	1468901700	0.413	25622	62038.7		0.585	49539.3	1883867400	0.392	31765	81033.2		0.727	53043.8	1649513700	0.438	31101	71006.8		49951.7	1678.93	1667427600	1.20125e+08	0.414333	0.0132958	29496	1946.46		0.636667	0.0453223	71359.6	5486.05	1	0.636667
JW0225	ECK0236	b0235	ykfJ	3	17	8	F	15	K		0.505	41020.7	1556637300	0.338	26232	77609.5		0.56	48642.6	1828851300	0.374	30873	82548.1		0.526	43672.4	1672754400	0.354	29564	83514.1		44445.2	2233.93	1686081000	7.88634e+07	0.355333	0.0104137	28889.7	1381.52		0.530333	0.0160243	81223.9	1828.61	1	0.530333
JW1942	ECK1957	b1959	yedA	3	19	8	F	16	K		0.751	56609.9	246329100	0.448	4668	10419.6		0.719	59357.4	270666900	0.459	5206	11342		0.762	56048.7	257077800	0.44	5290	12022.7		57338.7	1022.3	258024600	7.04165e+06	0.449	0.00550757	5054.67	194.848		0.744	0.012897	11261.5	464.521	1	0.744
JW1669	ECK1675	b1679	sufE	3	17	9	F	17	K		0.628	45760	1429367400	0.386	28310	73342		0.69	49821.8	1461807900	0.407	27995	68783.8		0.724	46604.7	1485929700	0.396	34174	86298		47395.5	1237.44	1459035000	1.63869e+07	0.396333	0.00606447	30159.7	2009.23		0.680667	0.028103	76141.2	5246.07	1	0.680667
JW1406	ECK1402	b1409	ynbB	3	19	9	F	18	K		0.748	52702.7	242073900	0.418	4719	11289.5		0.711	58870.2	272843100	0.452	5553	12285.4		0.782	55649.9	241751700	0.443	5289	11939.1		55740.9	1780.99	252222900	1.03105e+07	0.437667	0.0101708	5187	246.098		0.747	0.020502	11838	291.907	1	0.747
JW2625	ECK2640	b2644	yfjY	3	17	10	F	19	K		0.691	46792.5	583958700	0.39	12587	32274.4		0.787	59663.9	691717500	0.465	14956	32163.4		0.846	53345.5	602181900	0.438	14010	31986.3		53267.3	3715.84	625952700	3.33005e+07	0.431	0.0219317	13851	688.477		0.774667	0.0451676	32141.4	83.8843	1	0.774667
JW0993	ECK0999	b1008	ycdI	3	19	10	F	20	K		0.732	58691.3	224454600	0.453	4532	10004.4		0.705	59677.6	198930600	0.45	4184	9297.78		0.673	53781.8	218562300	0.418	4915	11758.4		57383.6	1823.23	213982500	7.71578e+06	0.440333	0.0112002	4543.67	211.102		0.703333	0.0170522	10353.5	731.446	1	0.703333
JW0631	ECK0629	b0636	ybeA	3	17	11	F	21	K		0.707	34547.1	320939100	0.417	4206	10086.3		0.894	61941.2	145125900	0.472	2937	6222.46		0.793	49557.3	343909800	0.456	6105	13388.2		48681.9	7920.08	269991600	6.2784e+07	0.448333	0.0163333	4416	920.531		0.798	0.0540401	9898.98	2070.68	1	0.798
JW2575	ECK2591	b2593	yfiH	3	21	2	F	3	L		0.653	44586	2127465000	0.387	41108	106222		0.951	63537.8	2076048900	0.516	46303	89734.5		0.56	42847	2424891600	0.363	48794	134419		50323.6	6626.15	2209468500	1.08729e+08	0.422	0.0475079	45401.7	2264.06		0.721333	0.11793	110125	13046	1	0.721333
JW2748	ECK2771	b2777	ygcF	3	23	2	F	4	L		0.694	49223.2	1124370900	0.41	22773	55543.9		1.023	67567.1	1107105300	0.532	24665	46362.8		0.883	59035.6	1130260500	0.483	24186	50074.5		58608.7	5299.73	1120578900	6.94803e+06	0.475	0.0354448	23874.7	567.924		0.866667	0.0953246	50660.4	2666.5	1	0.866667
JW1457	ECK1456	b1462	yddH	3	23	3	F	6	L		0.563	43198	1793785500	0.371	33881	91323.5		0.576	47485.3	2249278200	0.387	39913	103134		0.484	40558.7	2356271100	0.335	42983	128307		43747.3	2018.33	2133111600	1.72451e+08	0.364333	0.0153768	38925.7	2673.49		0.541	0.028746	107588	10906.2	1	0.541
JW1684	ECK1692	b1694	ydiF	3	21	4	F	7	L		0.625	45763.7	1760617800	0.399	33559	84107.8		0.641	53111.5	1775232000	0.432	31454	72810.2		0.606	46931.3	1777243500	0.394	33922	86096.4		48602.2	2279.72	1771031100	5.23893e+06	0.408333	0.011921	32978.3	769.337		0.624	0.010116	81004.8	4137.33	1	0.624
JW0798	ECK0802	b0813	rhtA	3	23	4	F	8	L		0.661	47612.6	1617933600	0.412	33399	81065.5		0.625	50182.5	1804619700	0.41	33860	82585.4		0.594	43721.2	1746909000	0.372	35604	95709.7		47172.1	1878.17	1723154100	5.5185e+07	0.398	0.0130128	34287.7	671.486		0.626667	0.0193592	86453.5	4648.83	1	0.626667
JW0260	ECK0268	b0267	yagA	3	21	5	F	9	L		0.659	47420.7	1491698700	0.406	28679	70637.9		0.625	51751.3	1766276100	0.412	30235	73385.9		0.563	44958.8	1716175800	0.374	32011	85590.9		48043.6	1985.43	1658050200	8.44238e+07	0.397333	0.0117945	30308.3	962.564		0.615667	0.028103	76538.3	4595.32	1	0.615667
JW1435	ECK1434	b1440	ydcS	3	21	6	F	11	L		0.438	32781.1	2643925500	0.298	47756	160255		0.662	46053.5	2878625700	0.399	53542	134190		0.673	40471.1	2231197200	0.372	45719	122901		39768.6	3847.5	2584582800	1.89237e+08	0.356333	0.0301901	49005.7	2343.15		0.591	0.0765659	139115	11060.9	1	0.591
JW1150	ECK1150	b1163	ycgF	3	23	6	F	12	L		0.609	43448.6	2257713000	0.388	39796	102567		0.737	56539.3	2207617200	0.478	37161	77742.7		0.81	54857	1912289400	0.468	37398	79910.3		51614.9	4111.96	2125873200	1.07767e+08	0.444667	0.02848	38118.3	841.619		0.718667	0.0587433	86740	7938.21	1	0.718667
JW2062	ECK2073	b2077	mdtD	3	21	7	F	13	L		0.545	42582.4	1960112700	0.359	36313	101150		0.718	58148.8	1778489100	0.471	33198	70484.1		0.678	52379.2	1811472300	0.439	37534	85498.9		51036.8	4543.48	1850024700	5.58614e+07	0.423	0.0333067	35681.7	1290.89		0.647	0.0522909	85711.1	8853.25	1	0.647
JW1210	ECK1213	b1219	ychN	3	23	7	F	14	L		0.449	37944.5	2022989400	0.323	35546	110050		0.558	47466.4	2362518000	0.391	40722	104148		0.651	47812.4	2012402700	0.412	38754	94063.1		44407.8	3233.17	2132636700	1.14981e+08	0.375333	0.0268597	38340.7	1508.41		0.552667	0.0583733	102754	4667.27	1	0.552667
JW2165	ECK2171	b2177	yejA	3	21	8	F	15	L		0.652	44899.1	2218529700	0.382	46811	122542		0.627	54882.7	2566897200	0.439	49764	113358		0.592	45491.5	2500857000	0.372	51651	138847		48424.4	3233.66	2428761300	1.06831e+08	0.397667	0.0208673	49408.7	1408.44		0.623667	0.0174005	124915	7453.17	1	0.623667
JW1309	ECK1311	b1316	ycjT	3	23	8	F	16	L		0.768	62441.9	1449419400	0.509	26373	51813.4		0.845	67637	1634707800	0.543	30591	56337		0.922	68815.4	1420485300	0.565	28394	50254.9		66298.1	1957.86	1501537500	6.7107e+07	0.539	0.0162891	28452.7	1217.98		0.845	0.044456	52801.7	1823.99	1	0.845
JW2258	ECK2257	b2263	yfbB	3	21	9	F	17	L		0.673	44835.2	1853892000	0.383	35297	92159.3		0.615	49404.3	1910862900	0.406	35740	88029.6		0.689	44564.5	1845137700	0.386	38715	100298		46268	1570.11	1869964200	2.06049e+07	0.391667	0.0072188	36584	1073.15		0.659	0.0224796	93495.6	3604.05	1	0.659
JW1405	ECK1401	b1408	ynbA	3	23	9	F	18	L		0.652	40151.8	1967516100	0.363	37162	102375		0.63	47745.9	2325377700	0.39	43655	111936		0.62	41872.1	2065672800	0.365	44473	121844		43256.6	2298.94	2119522200	1.06757e+08	0.372667	0.00868588	41763.3	2312.75		0.634	0.00945163	112051	5620.57	1	0.634
JW1636	ECK1640	b1644	ydhJ	3	23	10	F	20	L		0.659	49341.3	1206042300	0.406	24890	61305.4		0.66	55519.4	1258558200	0.444	24494	55166.7		0.669	50575.8	1246356000	0.423	27277	64484.6		51812.2	1887.55	1236985500	1.58675e+07	0.424333	0.0109899	25553.7	869.217		0.662667	0.0031798	60318.9	2734.72	1	0.662667
JW2488	ECK2499	b2503	yfgF	3	21	11	F	21	L		0.665	44210	1641186000	0.389	31759	81642.7		0.757	54789	2098246500	0.446	39739	89100.9		0.942	56725.4	1904517900	0.486	41932	86279.8		51908.1	3889.45	1881316800	1.32451e+08	0.440333	0.0281445	37810	3091.02		0.788	0.0814514	85674.5	2174.18	1	0.788
JW5274	ECK1689	b1691	ydiN	3	23	11	F	22	L		0.796	52788.3	1380137400	0.451	28518	63232.8		0.776	57166.7	1471052700	0.474	26994	56949.4		0.88	55482.7	1390015800	0.469	28058	59825.2		55145.9	1275.1	1413735300	2.88002e+07	0.464667	0.00698411	27856.7	451.311		0.817333	0.0318608	60002.4	1816.04	0.946387	0.773514
JW2559	ECK2573	b2575	yfiC	3	21	12	F	23	L		0.799	52031.8	1908596700	0.454	43711	96279.7		0.857	57333	1739070000	0.495	37005	74757.6		0.741	51944.2	1813416300	0.456	41787	91638.2		53769.7	1781.83	1820361000	4.90612e+07	0.468333	0.0133458	40834.3	1993.6		0.799	0.0334863	87558.5	6539.21	0.861677	0.68848
JW1243	ECK1245	b1251	yciI	3	17	1	G	1	M		0.634	40679.8	1769129100	0.376	32413	86204.8		1.239	63563.4	1594897200	0.584	33705	57714		0.823	50659.6	2018325600	0.465	44402	95488.2		51634.3	6623.87	1794117300	1.2287e+08	0.475	0.0602522	36840	3799.35		0.898667	0.178699	79802.3	11364.6	0.740584	0.665538
JW2151	ECK2157	b2164	yeiM	3	19	1	G	2	M		0.53	33032.6	1512974700	0.355	22407	63118.3		1.73	94198	192485700	0.713	3408	4779.8		0.842	50635.9	1774521900	0.517	34928	67559		59288.8	18179.2	1159994100	4.89611e+08	0.528333	0.103501	20247.7	9162.87		1.034	0.359466	45152.4	20226.9	0.861677	0.890974
JW1529	ECK1529	b1536	ydeI	3	17	2	G	3	M		0.484	39664.9	1619605800	0.336	31232	92952.4		1.095	66780.7	1410165900	0.574	33528	58411.1		0.67	49755.3	1636575300	0.417	34428	82561.2		52067	7912.54	1555449000	7.28065e+07	0.442333	0.0698626	33062.7	951.491		0.749667	0.180823	77974.9	10231.5	0.946387	0.709475
JW0501	ECK0506	b0513	ybbY	3	19	2	G	4	M		0.559	40787.9	2357096400	0.35	44597	127420		0.678	50273.8	3363801300	0.415	60833	146586		0.454	36532.1	3456900900	0.303	65111	214888		42531.3	4061.54	3059266200	3.52112e+08	0.356	0.0324705	56847	6248.26		0.563667	0.0647053	162964	26544.6	1	0.563667
JW1989	ECK2001	b2007	yeeX	3	17	3	G	5	M		0.57	39700.3	2011417200	0.341	39925	117082		0.634	53365.1	2694028500	0.421	54659	129831		0.498	44179.8	2498453100	0.35	47319	135197		45748.4	4021.87	2401299600	2.02952e+08	0.370667	0.0253004	47301	4253.35		0.567333	0.0392825	127370	5372.2	1	0.567333
JW1619	ECK1623	b1627	rsxA	3	19	3	G	6	M		0.774	81082.4	419930100	0.681	8916	13092.5		0.657	77111	582611400	0.625	12117	19387.2		0.602	64475.8	616333500	0.554	12495	22554.2		74223.1	5006.66	539625000	6.0634e+07	0.62	0.0367469	11176	1135.26		0.677667	0.050716	18344.6	2780.64	1	0.677667
JW2328	ECK2325	b2331	yfcN	3	17	4	G	7	M		0.535	36754.9	2017647900	0.345	37402	108412		0.689	52073.9	2711700900	0.432	49582	114773		0.591	42603.8	2174875200	0.373	45241	121290		43810.9	4463.21	2301408000	2.10107e+08	0.383333	0.0256407	44075	3564.07		0.605	0.0450037	114825	3717.63	1	0.605
JW2778	ECK2802	b2807	ygdD	3	19	4	G	8	M		0.598	45979.7	2353043700	0.383	43729	114175		0.537	47334	3157175700	0.359	55834	155526		0.531	42878.7	3083843700	0.345	54320	157449		45397.4	1318.66	2864687700	2.56696e+08	0.362333	0.0110955	51294.3	3807.83		0.555333	0.0214035	142384	14115.2	1	0.555333
JW2664	ECK2684	b2689	yqaA	3	17	5	G	9	M		0.687	52475.2	1550076300	0.439	29296	66733.5		0.672	62550.6	1906135200	0.489	32596	66658.5		0.653	53664.7	1698175800	0.438	33135	75650.7		56230.2	3178.83	1718129100	1.03268e+08	0.455333	0.0168358	31675.7	1199.96		0.670667	0.00983757	69680.9	2984.98	1	0.670667
JW0472	ECK0477	b0483	ybaQ	3	19	5	G	10	M		0.681	52129.9	491914800	0.408	9805	24031.9		0.686	58892.5	684216000	0.449	12746	28387.5		0.69	53247.6	556114500	0.432	11827	27377.3		54756.7	2092.94	577415100	5.6525e+07	0.429667	0.011893	11459.3	868.668		0.685667	0.00260342	26598.9	1316.23	1	0.685667
JW0750	ECK0756	b0767	ybhE	3	19	6	G	12	M		0.506	39055.1	1753012800	0.336	30988	92226.2		0.464	46189.4	1500781500	0.373	27341	73300.3		0.534	45973.4	1389109500	0.391	30031	76805.6		43739.3	2342.96	1547634600	1.0763e+08	0.366667	0.0161898	29453.3	1091.7		0.501333	0.0203415	80777.4	5813.16	1	0.501333
JW0185	ECK0189	b4406	yaeP	3	17	7	G	13	M		0.594	45616.1	1645382700	0.384	28805	75013		0.617	51804.7	1592601300	0.405	28429	70195.1		0.613	48509.2	1708272900	0.402	33914	84363.2		48643.3	1787.75	1648752300	3.3434e+07	0.397	0.00655744	30382.7	1769		0.608	0.0070946	76523.8	4159.15	1	0.608
JW0908	ECK0916	b0925	ycbB	3	19	7	G	14	M		0.507	41001.1	2022208200	0.345	36491	105771		0.514	45992.7	1823212800	0.363	31903	87887.1		0.497	40954.8	1847684700	0.341	35622	104463		42649.5	1671.64	1897701900	6.26527e+07	0.349667	0.00676593	34672	1407.04		0.506	0.00493288	99373.8	5755.77	1	0.506
JW0229	ECK0240	b0239	frsA	3	17	8	G	15	M		0.785	66793.7	252275400	0.522	4576	8766.28		0.825	66246.7	279197100	0.506	5307	10488.1		0.696	60211.3	278883000	0.453	5480	12097.1		64417.2	2108.89	270118500	8.92201e+06	0.493667	0.0208513	5121	277.039		0.768667	0.0381241	10450.5	961.717	1	0.768667
JW1964	ECK1978	b1983	yeeN	3	19	8	G	16	M		0.718	51559.4	404882100	0.402	9016	22427.9		0.914	58915.6	466994700	0.474	10042	21185.7		0.823	52368.9	399900600	0.429	9369	21839.2		54281.3	2328.91	423925800	2.15824e+07	0.435	0.021	9475.67	300.944		0.818333	0.0566284	21817.6	358.757	1	0.818333
JW5281	ECK1726	b1728	ydjM	3	17	9	G	17	M		0.602	44431.1	1807264800	0.377	38523	102183		0.674	51069.2	1909726200	0.425	40289	94797.6		0.682	50462.5	1868758200	0.425	42661	100379		48654.3	2118.83	1861916400	2.97752e+07	0.409	0.016	40491	1198.8		0.652667	0.0254384	99119.8	2222.97	1	0.652667
JW1530	ECK1530	b1537	ydeJ	3	19	9	G	18	M		0.743	58917.3	352177200	0.443	7022	15851		0.611	58597.7	439770600	0.443	8685	19605		0.827	59737.5	365564700	0.455	7802	17147.3		59084.2	339.455	385837500	2.72421e+07	0.447	0.004	7836.33	480.374		0.727	0.0628649	17534.4	1100.83	1	0.727
JW2662	ECK2681	b2687	luxS	3	17	10	G	19	M		0.71	50909.5	589878000	0.411	12141	29540.1		0.673	54414.9	592346700	0.431	11536	26765.7		0.657	47666.5	624373200	0.387	13058	33741.6		50997	1948.58	602199300	1.11098e+07	0.409667	0.0127192	12245	442.43		0.68	0.015695	30015.8	2027.78	1	0.68
JW1017	ECK1020	b1034	ycdX	3	19	10	G	20	M		0.707	51282.3	733458600	0.407	14872	36540.5		0.565	50493.6	825980400	0.401	15136	37745.6		0.613	47328.7	663966900	0.391	13534	34613.8		49701.5	1208.07	741135300	4.69265e+07	0.399667	0.00466667	14514	495.891		0.628333	0.0417027	36300	912.045	1	0.628333
JW0756	ECK0762	b0773	ybhB	3	19	11	G	22	M		0.916	65690.2	885465000	0.576	20463	35526		0.844	65557.5	186942600	0.494	4025	8147.77		0.688	38691.1	1706608800	0.403	32717	81183.6		56646.3	8977.67	926338800	4.39166e+08	0.491	0.0499633	19068.3	8311.97		0.816	0.0672904	41619.1	21302.6	0.946387	0.772252
JW1778	ECK1787	b1789	yeaL	3	17	12	G	23	M		0.739	57306.1	769619700	0.505	16309	32295		0.976	70373.7	163185300	0.542	3694	6815.5		1.012	70537.1	239481900	0.552	4738	8583.33		66072.3	4383.36	390762300	1.90705e+08	0.533	0.0142945	8247	4042.25		0.909	0.0856329	15898	8214.41	0.861677	0.783264
JW1308	ECK1310	b1315	ycjS	3	19	12	G	24	M		0.825	45082.9	1820563200	0.423	41582	98302.6		1.4	60674.6	1664548200	0.58	45143	77832.8		0.769	43571.1	1638422100	0.42	44379	105664		49776.2	5466.65	1707844500	5.68617e+07	0.474333	0.0528404	43701.3	1082.37		0.998	0.201649	93933.2	8326.01	0.740584	0.739103
JW2665	ECK2685	b2690	yqaB	3	23	1	G	2	N		0.478	40806.1	2265886800	0.343	36766	107190		1.362	66253.9	1680935400	0.637	32461	50959.2		0.693	48951.4	2333284200	0.449	49173	109517		52003.8	7503.03	2093368800	2.07132e+08	0.476333	0.0859638	39466.7	5009.76		0.844333	0.266171	89221.8	19143.1	0.861677	0.727543
JW2592	ECK2608	b2611	ypjD	3	21	2	G	3	N		0.503	48005.4	1317611700	0.393	21222	54000		1.437	83322.1	1202425200	0.666	24656	37021		0.829	58249.6	1457809200	0.494	26415	53471.7		63192.4	10490.3	1325948700	7.38408e+07	0.517667	0.0796918	24097.7	1524.86		0.923	0.273688	48164.2	5573.69	0.946387	0.873515
JW2765	ECK2789	b2794	yqcD	3	23	2	G	4	N		0.603	45253.9	1611134100	0.367	30593	83359.7		0.771	62547.1	1568948400	0.475	30409	64018.9		0.654	53243.3	1660357800	0.406	31895	78559.1		53681.4	4996.93	1613480100	2.64137e+07	0.416	0.0315753	30965.7	467.693		0.676	0.0497293	75312.6	5814.38	0.946387	0.639758
JW2266	ECK2265	b2271	yfbL	3	21	3	G	5	N		0.644	41607.8	2417699700	0.368	49496	134500		0.652	44915	2500265700	0.397	53498	134756		0.421	34378.8	2930103900	0.305	58881	193052		40300.6	3110.98	2616023100	1.58839e+08	0.356667	0.0271559	53958.3	2718.98		0.572333	0.0757019	154103	19475	0.946387	0.541649
JW2680	ECK2705	b2710	norV	3	23	3	G	6	N		0.739	57269.5	2053287000	0.461	38030	82494.6		1.013	77257.2	2230246800	0.601	44238	73607.3		1.011	71967.1	1757378700	0.576	37449	65015.6		68831.2	5979.17	2013637500	1.37937e+08	0.546	0.0431084	39905.7	2172.65		0.921	0.0910018	73705.8	5045.98	0.946387	0.871622
JW1787	ECK1796	b1798	yeaS	3	21	4	G	7	N		0.665	45028.6	1515244500	0.396	29348	74111.1		0.916	64673.8	2034906300	0.525	42673	81281.9		0.998	62247.5	1725378300	0.537	38264	71255.1		57316.7	6183.81	1758509700	1.50925e+08	0.486	0.0451331	36761.7	3919.25		0.859667	0.10017	75549.4	2982.48	0.946387	0.813577
JW0278	ECK0283	b0284	yagR	3	21	5	G	9	N		0.552	39144.2	1870515900	0.346	37022	107000		0.584	48586.3	2220818400	0.404	39492	97752.5		0.577	42933.5	1958891400	0.376	40631	108061		43554.7	2743.33	2016741900	1.05179e+08	0.375333	0.0167465	39048.3	1065.18		0.571	0.00971253	104271	3273.73	0.946387	0.540387
JW1007	ECK1012	b1022	ycdQ	3	23	5	G	10	N		0.546	41190.9	2350159200	0.348	43975	126365		0.365	41987.1	6035716800	0.327	109676	335401		0.414	41348.6	3922894800	0.345	70514	204388		41508.9	243.394	4102923600	1.06773e+09	0.34	0.00655744	74721.7	19082.6		0.441667	0.0540504	222051	60986.2	0.946387	0.417988
JW1459	ECK1458	b1464	yddE	3	21	6	G	11	N		0.564	39334.8	1935079200	0.347	34788	100254		0.685	53983.4	2144101500	0.447	39912	89288.6		0.779	50942.4	2011718700	0.443	42658	96293.5		48086.9	4463.24	2030299800	6.10506e+07	0.412333	0.0326871	39119.3	2306.18		0.676	0.0622281	95278.5	3205.74	0.946387	0.639758
JW2070	ECK2082	b2086	yegS	3	21	7	G	13	N		0.582	44839.3	1631151900	0.389	29288	75290.5		0.854	63278.3	1909742400	0.518	36984	71397.7		1.206	65361.6	1702576800	0.577	39550	68544.2		57826.4	6521.35	1747823700	8.35437e+07	0.494667	0.0555108	35274	3083.3		0.880667	0.180626	71744.1	1955.18	0.946387	0.833451
JW1211	ECK1214	b1220	ychP	3	23	7	G	14	N		0.645	36230	2020755600	0.351	29671	84532.8		0.666	49020	2614335300	0.418	43160	103254		0.716	47078.5	2083781700	0.426	35933	84349.8		44109.5	3979.4	2239624200	1.88237e+08	0.398333	0.0237791	36254.7	3897.26		0.675667	0.0210581	90712	6271	0.946387	0.639442
JW2172	ECK2178	b2184	yejH	3	21	8	G	15	N		0.653	40872.2	2089028700	0.37	40683	109954		0.724	54245.4	2058784200	0.456	40150	88048.2		0.634	47134.5	2218375800	0.404	45841	113468		47417.4	3863.1	2122062900	4.89415e+07	0.41	0.0250067	42224.7	1814.7		0.670333	0.0273882	103823	7952.52	0.946387	0.634395
JW1323	ECK1327	b1330	ynaI	3	23	8	G	16	N		0.734	48734.9	1691541000	0.418	32699	78227.3		0.642	52569.8	1758861900	0.447	31403	70252.8		0.629	48027.8	1673510400	0.417	34263	82165.5		49777.5	1411	1707971100	2.59723e+07	0.427333	0.00983757	32788.3	826.818		0.668333	0.0330471	76881.8	3504.07	0.946387	0.632502
JW2289	ECK2286	b2292	yfbS	3	21	9	G	17	N		0.584	40175.6	1682264700	0.352	30453	86514.2		0.583	48895.1	1820898900	0.41	32034	78131.7		0.718	49632.5	1799208900	0.427	35952	84196.7		46234.4	3036.85	1767457500	4.30541e+07	0.396333	0.0227034	32813	1634.51		0.628333	0.0448343	82947.5	2499.13	0.946387	0.594646
JW1430	ECK1428	b1434	ydcN	3	23	9	G	18	N		0.562	42445.2	1709791200	0.382	27153	71081.2		0.463	44449.7	2288208600	0.381	36344	95391.1		0.555	43543.9	1961636400	0.39	31501	80771.8		43479.6	579.537	1986545400	1.67439e+08	0.384333	0.002848	31666	2654.5		0.526667	0.0318974	82414.7	7065.58	0.946387	0.49843
JW2378	ECK2377	b2381	ypdB	3	21	10	G	19	N		0.63	42115.9	1657038600	0.377	31325	83090.2		0.698	56644	2022806700	0.457	37823	82763.7		0.78	51559.8	2033414100	0.443	40544	91521.4		50106.6	4256.4	1904419800	1.23728e+08	0.425667	0.0246667	36564	2734.73		0.702667	0.0433641	85791.8	2866.39	0.946387	0.664995
JW1646	ECK1650	b1654	ydhD	3	23	10	G	20	N		0.786	47990.4	2068972200	0.422	49049	116230		0.734	52360	2238923700	0.435	45922	105568		0.61	43990.9	2206113300	0.377	48686	129141		48113.8	2416.74	2171336400	5.20511e+07	0.411333	0.0175721	47885.7	987.409		0.71	0.0522047	116979	6815.18	0.946387	0.671935
JW1686	ECK1694	b1696	ydiP	3	23	11	G	22	N		0.869	55983.1	1156993200	0.472	28547	60480.9		0.957	62749	1083369600	0.534	24093	45118		0.966	57107.1	1115613000	0.501	25857	51610.8		58613	2093.28	1118658600	2.13078e+07	0.502333	0.0179103	26165.7	1294.99		0.930667	0.0309426	52403.2	4452.57	0.946387	0.880771
JW2568	ECK2582	b2584	yfiQ	3	21	12	G	23	N		0.731	49627.1	1841843700	0.422	38199	90519		0.965	62137.3	1347679800	0.538	27705	51496.3		0.9	56497.3	1370448000	0.504	31502	62504		56087.2	3617.22	1519990500	1.61061e+08	0.488	0.0344287	32468.7	3067.67		0.865333	0.0697384	68173.1	11616	0.861677	0.745638
JW1802	ECK1811	b1813	yeaB	3	23	12	G	24	N		0.843	51200.8	1424221200	0.456	33012	72394.7		1.211	61781.8	1276178400	0.567	31386	55354.5		0.79	51732.8	1265466600	0.46	30880	67130.4		54905.1	3441.74	1321955400	5.12263e+07	0.494333	0.0363517	31759.3	643.141		0.948	0.132387	64959.9	5037.39	0.740584	0.702074
JW1271	ECK1274	b1279	yciS	3	17	1	H	1	O		0.995	55616.1	218090700	0.481	3476	7226.61		1.813	76505.7	344889000	0.676	4362	6452.66		1.303	65644.3	346684500	0.572	5340	9335.66		65922	6031.89	303221400	4.25685e+07	0.576333	0.0563333	4392.67	538.309		1.37033	0.238524	7671.65	861.484	0.740584	1.01485
JW2496	ECK2508	b2512	yfgL	3	19	1	H	2	O		0.436	35114.8	1937666700	0.315	31100	98730.2		1.261	41059.7	158526000	0.515	2692	5227.18		0.635	39509.2	2218555800	0.396	45723	115462		38561.2	1780.38	1438249500	6.44979e+08	0.408667	0.0580814	26505	12632.7		0.777333	0.248563	73139.8	34298.1	0.861677	0.66981
JW1606	ECK1609	b1614	ydgA	3	17	2	H	3	O		0.576	51615.8	1097517600	0.4	18620	46550		1.356	85200.9	994297500	0.666	22468	33735.7		0.871	62584.5	1001766600	0.506	21555	42598.8		66467.1	9887.64	1031193900	3.32319e+07	0.524	0.0773132	20881	1160.82		0.934333	0.227382	40961.5	3788.66	0.861677	0.805094
JW0504	ECK0509	b0516	allC	3	19	2	H	4	O		0.501	36775.5	2660389200	0.337	53184	157816		0.99	61467.9	2183474700	0.514	51772	100724		0.645	44955.4	2591743500	0.392	58758	149893		47732.9	7262.11	2478535800	1.48855e+08	0.414333	0.0523015	54571.3	2132.65		0.712	0.145083	136144	17857.3	0.861677	0.613514
JW2139	ECK2145	b2152	yeiB	3	17	3	H	5	O		0.63	46916.2	1657652400	0.41	33981	82880.5		0.96	69861.2	1800108900	0.582	40130	68951.9		0.781	59853.5	1884251700	0.496	41270	83205.6		58877	6641.64	1780671000	6.61316e+07	0.496	0.0496521	38460.3	2263.72		0.790333	0.095377	78346	4698	0.861677	0.681012
JW1626	ECK1630	b1634	ydgR	3	19	3	H	6	O		0.76	47338.4	1352178900	0.512	23843	46568.4		1.265	86965.2	242618400	0.638	5118	8021.94		1.447	80702.7	232631100	0.607	4956	8164.74		71668.8	12298.8	609142800	3.71529e+08	0.585667	0.0379049	11305.7	6268.84		1.15733	0.205496	20918.3	12825.1	0.861677	0.997248
JW2340	ECK2337	b2343	yfcZ	3	17	4	H	7	O		0.641	44091	1410183000	0.376	25536	67914.9		0.797	55984.8	1631583000	0.487	32274	66271		1.061	58998.4	1343058300	0.53	31300	59056.6		53024.7	4550.79	1461608100	8.71685e+07	0.464333	0.0458779	29703.3	2102.55		0.833	0.122572	64414.2	2720.5	0.861677	0.717777
JW2707	ECK2732	b2737	ygbK	3	17	5	H	9	O		0.638	47992	248444100	0.398	4853	12193.5		0.933	67399.2	295705800	0.539	5888	10923.9		1.056	60693.2	269364600	0.507	6011	11856		58694.8	5690.8	271171500	1.36732e+07	0.481333	0.0426784	5584	367.221		0.875667	0.124025	11657.8	379.647	0.861677	0.754542
JW0491	ECK0496	b0503	ybbB	3	19	5	H	10	O		0.812	61322.8	237022200	0.481	4418	9185.03		0.974	70002.3	399485700	0.552	7124	12905.8		1.17	67235.1	288272700	0.55	5793	10532.7		66186.7	2559.81	308260200	4.79521e+07	0.527667	0.0233405	5778.33	781.189		0.985333	0.103501	10874.5	1087.6	0.861677	0.849039
JW0099	ECK0102	b0102	yacF	3	17	6	H	11	O		0.643	53092.7	1829368800	0.429	36616	85352		0.81	57764.1	1851220800	0.493	38341	77770.8		0.785	52140.3	1872783000	0.466	44888	96326.2		54332.4	1737.74	1851124200	1.25327e+07	0.462667	0.0185502	39948.3	2519.53		0.746	0.0520032	86483	5386.25	0.861677	0.642811
JW0752	ECK0758	b0769	ybhH	3	19	6	H	12	O		0.884	58870.9	262018800	0.531	4953	9327.68		1.136	69943.1	321647400	0.58	6538	11272.4		1.155	61230.2	234469800	0.56	5299	9462.5		63348.1	3367.13	272712000	2.57277e+07	0.557	0.0142244	5596.67	481.148		1.05833	0.0873391	10020.9	626.983	0.861677	0.911941
JW0186	ECK0190	b0190	yaeQ	3	17	7	H	13	O		0.86	72242.4	228700800	0.558	3936	7053.76		1.377	107101	273121200	0.803	5438	6772.1		1.431	94290.8	237568500	0.717	4893	6824.27		91211.3	10179.9	246463500	1.35724e+07	0.692667	0.0717643	4755.67	438.994		1.22267	0.182002	6883.38	86.513	0.861677	1.05354
JW0909	ECK0917	b0926	ycbK	3	19	7	H	14	O		0.701	46587	1477653300	0.409	28345	69303.2		0.902	59024	1597475700	0.498	33826	67923.7		0.816	54547.7	1414040400	0.474	32801	69200.4		53386.2	3636.92	1496389800	5.37755e+07	0.460333	0.0265853	31657.3	1682.39		0.806333	0.0582247	68809.1	443.694	0.861677	0.694799
JW0234	ECK0246	b0245	ykfI	3	17	8	H	15	O		0.627	45883.5	1566504900	0.387	27690	71550.4		0.797	57935.2	1727777700	0.469	33866	72209		0.85	58165.4	1519470000	0.479	31372	65494.8		53994.7	4056.14	1604584200	6.30755e+07	0.445	0.0291433	30976	1793.82		0.758	0.0672632	69751.4	2136.77	0.861677	0.653151
JW2230	ECK2228	b2236	yfaE	3	19	8	H	16	O		0.556	40170.1	2039872500	0.351	36548	104125		0.67	47145.2	1822719600	0.404	35708	88386.1		0.537	41452.2	1926167400	0.356	38678	108646		42922.5	2143.54	1929586500	6.27099e+07	0.370333	0.0168951	36978	883.912		0.587667	0.0415304	100386	6140.14	0.861677	0.506379
JW1984	ECK1995	b2002	yeeS	3	17	9	H	17	O		0.67	54839.6	433746000	0.445	8348	18759.6		0.825	62431.2	771847200	0.51	15322	30043.1		0.871	57591.7	821576700	0.483	17412	36049.7		58287.5	2218.95	675723300	1.21837e+08	0.479333	0.0188532	13694	2740.24		0.788667	0.0608011	28284.1	5068.13	0.861677	0.679576
JW1762	ECK1771	b1773	ydjI	3	19	9	H	18	O		0.775	47102.2	525501000	0.434	9109	20988.5		0.576	48834.8	977619600	0.413	15815	38293		0.574	46105.1	832246200	0.403	13176	32694.8		47347.4	797.474	778455600	1.33258e+08	0.416667	0.00913479	12700	1950.43		0.641667	0.0666692	30658.7	5098.06	0.861677	0.552909
JW2782	ECK2807	b2811	ygdK	3	17	10	H	19	O		0.865	62455.9	898085700	0.504	17029	33787.7		0.76	60719.9	1088599500	0.474	19325	40770		0.763	56160.4	1140570000	0.426	20387	47856.8		59778.7	1877.3	1042418400	7.37093e+07	0.468	0.0227156	18913.7	990.949		0.796	0.0345109	40804.8	4061.44	0.861677	0.685895
JW1258	ECK1260	b1266	yciV	3	19	10	H	20	O		0.735	48595	1986527700	0.419	41046	97961.8		0.805	54490.7	1947063600	0.447	36862	82465.3		0.607	46457.2	1966958100	0.393	39447	100374		49847.6	2402.16	1966849800	1.13924e+07	0.419667	0.015592	39118.3	1218.94		0.715667	0.0579693	93600.4	5610.91	0.861677	0.616674
JW0642	ECK0640	b0647	ybeT	3	17	11	H	21	O		0.685	46477.6	1575990900	0.42	31303	74531		0.693	42926.2	1501403400	0.428	24587	57446.3		0.759	48889.4	1390045500	0.452	31229	69090.7		46097.8	1731.88	1489146600	5.40265e+07	0.433333	0.0096148	29039.7	2226.44		0.712333	0.0234473	67022.6	5039.16	0.861677	0.613801
JW1327	ECK1329	b1333	uspE	3	19	11	H	22	O		0.785	46127.2	551848500	0.415	11329	27298.8		1.004	69206.4	158070600	0.534	3202	5996.25		0.794	44767.2	953653500	0.444	20701	46623.9		53366.9	7929.46	554524200	2.29669e+08	0.464333	0.0358252	11744	5055.79		0.861	0.0715472	26639.6	11732.8	0.861677	0.741904
JW1916	ECK1930	b1931	yedK	3	17	12	H	23	O		0.836	58863.6	556250400	0.473	12890	27251.6		1.062	72544.4	435637800	0.574	10499	18290.9		0.982	65199.2	482743800	0.54	11610	21500		65535.7	3952.89	491544000	3.50948e+07	0.529	0.0296704	11666.3	690.797		0.96	0.0661614	22347.5	2621.2	0.861677	0.82721
JW1333	ECK1335	b1339	abgR	3	19	12	H	24	O		0.789	47109.4	317838600	0.445	6718	15096.6		1.154	54481.1	297861300	0.534	7108	13310.9		0.701	39558.2	238511700	0.386	5467	14163.2		47049.6	4308	284737200	2.38214e+07	0.455	0.0430155	6431	494.974		0.881333	0.13868	14190.2	515.684	0.740584	0.652701
JW1105	ECK1105	b1119	ycfX	3	21	1	H	1	P		0.782	45318.1	2385697500	0.398	58296	146472		1.311	59005.3	1988270100	0.548	51332	93671.5		0.826	46319.8	2174801400	0.423	58375	138002		50214.4	4404.98	2182923000	1.14799e+08	0.456333	0.046398	56001	2334.61		0.973	0.169477	126049	16372.2	0.740584	0.720588
JW2681	ECK2706	b2711	norW	3	23	1	H	2	P		0.617	42018.3	2338479900	0.363	46649	128510		1.621	67931.6	1558930500	0.665	40405	60759.4		0.835	47100.5	2269943100	0.451	58606	129947		52350.2	7927.68	2055784500	2.49214e+08	0.493	0.0896735	48553.3	5339.76		1.02433	0.304899	106405	22826.7	0.740584	0.758605
JW2709	ECK2734	b2739	ygbM	3	21	2	H	3	P		0.474	35156.2	5996340000	0.301	105378	350093		0.988	61268.8	5181499800	0.516	122153	236731		0.666	44389.8	5772463200	0.402	137496	342030		46938.3	7645	5650101000	2.4305e+08	0.406333	0.062103	121676	9274.74		0.709333	0.149953	309618	36517.9	0.740584	0.525321
JW2798	ECK2826	b2830	nudH	3	23	2	H	4	P		0.519	42421.4	2701255500	0.364	49002	134621		0.759	53571.6	2048787000	0.481	38300	79625.8		0.708	50613.8	2302178400	0.456	50445	110625		48869	3334.92	2350740300	1.8991e+08	0.433667	0.0355731	45915.7	3830.55		0.662	0.073	108291	15918.6	0.740584	0.490267
JW0191	ECK0195	b0195	yaeB	3	21	3	H	5	P		0.703	47503.2	1938423600	0.413	39498	95636.8		1.273	71858.5	1629040500	0.625	41310	66096		1.342	62035.1	1541749500	0.575	40886	71106.1		60465.6	7074.44	1703071200	1.20344e+08	0.537667	0.0639826	40564.7	547.198		1.106	0.202482	77613	9127.24	0.740584	0.819086
JW0497	ECK0502	b0509	glxR	3	23	3	H	6	P		0.576	39165.8	2176321500	0.358	46530	129972		1.08	60165.5	2154170700	0.55	52943	96260		1.052	52904.4	1981911600	0.51	55542	108906		50745.3	6157.47	2104134600	6.14451e+07	0.472667	0.0584846	51671.7	2678.07		0.902667	0.163533	111713	9832.5	0.740584	0.6685
JW1890	ECK1900	b1902	yecI	3	21	4	H	7	P		0.689	43299.1	1852854300	0.387	39933	103186		1.222	66606.3	1626128100	0.602	39984	66418.6		1.137	57630.9	1603822500	0.54	43326	80233.3		55845.4	6787.18	1694268300	7.9554e+07	0.509667	0.0638914	41081	1122.6		1.016	0.165331	83279.3	10722.6	0.740584	0.752433
JW1121	ECK1121	b1135	ymfC	3	23	4	H	8	P		0.655	42873.6	2121561900	0.386	37340	96735.8		0.959	57837.8	2160036900	0.525	39418	75081.9		1.004	53738.3	1756147500	0.513	37642	73376.2		51483.2	4464.52	2012582100	1.28697e+08	0.474667	0.0444685	38133.3	648.223		0.872667	0.109606	81731.3	7518.37	0.740584	0.646283
JW0279	ECK0284	b0285	yagS	3	21	5	H	9	P		0.633	42135	1919184300	0.376	43361	115322		1.106	64082.7	1919593800	0.551	48017	87145.2		0.875	55030.7	1987194600	0.486	54059	111233		53749.5	6368.05	1941990900	2.26022e+07	0.471	0.0510718	48479	3096.87		0.871333	0.136556	104567	8790.28	0.740584	0.645296
JW1042	ECK1040	b1055	yceA	3	23	5	H	10	P		0.79	56382.4	1688353200	0.467	36204	77524.6		1.26	69626.6	1860750900	0.595	46169	77595		1.137	60834.4	1567197000	0.55	42716	77665.5		62281.1	3891.1	1705433700	8.5171e+07	0.537333	0.0374893	41696.3	2921.48		1.06233	0.14072	77595	40.6539	0.740584	0.786747
JW1994	ECK2006	b2012	yeeD	3	21	6	H	11	P		0.759	46385.3	2465483400	0.41	56936	138868		1.245	65855.2	2618151300	0.592	66252	111912		1.096	56244.6	2423084400	0.532	67052	126038		56161.7	5620.65	2502239700	5.92341e+07	0.511333	0.0535454	63413.3	3246.89		1.03333	0.143752	125606	7784.56	0.740584	0.76527
JW1221	ECK1228	b1233	ychJ	3	23	7	H	14	P		0.828	48638.1	1489121100	0.437	28772	65839.8		1.59	74695.3	1490929200	0.673	38083	56586.9		1.65	68659.6	1124024400	0.663	30486	45981.9		63997.7	7874.97	1368024900	1.22001e+08	0.591	0.0770541	32447	2861.11		1.356	0.264568	56136.2	5736.91	0.740584	1.00423
JW1434	ECK1433	b1439	ydcR	3	23	9	H	18	P		0.879	69485.2	1291726800	0.575	24934	43363.5		1.562	89072.1	1216190700	0.741	28264	38143		1.105	75373.2	1342982700	0.609	29489	48422		77976.8	5802.17	1283633400	3.68247e+07	0.641667	0.0506272	27562.3	1360.91		1.182	0.200889	43309.5	2967.4	0.740584	0.87537
JW2379	ECK2378	b2382	ypdC	3	21	10	H	19	P		0.7	42121.7	2333415600	0.412	53294	129354		1.249	66135.1	1836279000	0.589	48118	81694.4		0.713	45876.2	2243271600	0.416	51905	124772		51377.7	7457.87	2137655400	1.52919e+08	0.472333	0.0583448	51105.7	1546.71		0.887333	0.180872	111940	15180.6	0.740584	0.657145
JW2500	ECK2512	b2516	yfgA	3	21	11	H	21	P		0.698	47459	1969454700	0.403	42792	106184		1.277	67708.7	1292885100	0.582	32330	55549.8		0.832	51312.8	1359408600	0.464	33248	71655.2		55493.5	6208.1	1540582800	2.15294e+08	0.483	0.0525389	36123.3	3344.85		0.935667	0.174996	77796.2	14935.7	0.740584	0.69294
JW1805	ECK1814	b1816	yoaE	3	23	12	H	24	P		0.78	46550.7	2198389500	0.407	52689	129457		1.379	66740.3	1404797400	0.62	37334	60216.1		1.004	52217.6	1783504800	0.474	49329	104070		55169.5	6012.23	1795563900	2.2917e+08	0.500333	0.0628817	46450.7	4660.39		1.05433	0.174738	97914.3	20223.7	0.740584	0.780822
JW2035	ECK2044	b2050	wcaI	4	27	1	A	2	A		0.53	38601.6	2694002400	0.337	51089	151599		1.326	65741.5	2078087400	0.627	54256	86532.7		0.887	56801.7	1978200000	0.503	47909	95246.5		53714.9	7985.18	2250096600	2.23818e+08	0.489	0.0840079	51084.7	1832.22		0.914333	0.230191	111126	20392.3	0.740584	0.677141
JW1917	ECK1931	b1932	yedL	4	25	2	A	3	A		0.619	37943.6	2358415800	0.352	45176	128341		1.093	55242.5	2097528300	0.518	55305	106766		0.762	48421.1	1877277600	0.438	43271	98792.2		47202.4	5030.83	2111073900	1.39058e+08	0.436	0.0479305	47917.3	3734.54		0.824667	0.140374	111300	8826	0.740584	0.610735
JW2118	ECK2123	b2130	yehY	4	27	2	A	4	A		0.652	47021.7	2298003300	0.387	41285	106680		1.01	59787.2	2298424500	0.524	50890	97118.3		0.76	59032.7	1884948300	0.498	41794	83923.7		55280.5	4135.16	2160458700	1.37755e+08	0.469667	0.0420093	44656.3	3120.29		0.807333	0.106021	95907.2	6596.91	0.740584	0.597898
JW2761	ECK2784	b2790	yqcA	4	25	3	A	5	A		0.557	40640.5	3252051000	0.357	58867	164894		0.883	50699.2	3458277000	0.479	83132	173553		0.66	52405.7	2399576400	0.457	55415	121258		47915.1	3670.53	3036634800	3.24045e+08	0.431	0.0375411	65804.7	8720.79		0.7	0.0962098	153235	16182.6	0.740584	0.518409
JW2204	ECK2209	b2216	rcsD	4	27	3	A	6	A		0.596	41720.5	3896916300	0.344	78790	229041		0.94	57284.7	3449640600	0.482	85815	178039		0.63	55024.5	3087203400	0.434	71338	164373		51343.2	4855.41	3477920100	2.34171e+08	0.42	0.0404475	78647.7	4179.76		0.722	0.109441	190484	19677.6	0.740584	0.534702
JW2516	ECK2529	b2532	yfhQ	4	27	4	A	8	A		0.559	40174.7	2596186800	0.346	45610	131821		0.78	43456	3735831600	0.409	76726	187594		0.551	42359.9	3048480000	0.353	65891	186660		41996.8	964.473	3126832800	3.31312e+08	0.369333	0.019936	62742.3	9119.34		0.63	0.0750355	168692	18437.4	0.740584	0.466568
JW5922	ECK2635	b2639	ypjL	4	27	5	A	10	A		0.68	46237.9	2822715900	0.399	51015	127857		1.201	64699.3	3174344100	0.573	76834	134091		0.974	64178.1	2643251400	0.541	62661	115824		58371.8	6068.81	2880103800	1.55975e+08	0.504333	0.0534707	63503.3	7465.19		0.951667	0.150814	125924	5360.89	0.740584	0.704789
JW0310	ECK0316	b0318	yahD	4	25	6	A	11	A		0.623	55356.4	2554909200	0.45	49078	109062		0.975	57177.9	2747971800	0.516	62418	120965		0.724	56652.9	2222532000	0.485	49768	102614		56395.7	541.321	2508471000	1.53448e+08	0.483667	0.0190642	53754.7	4336.24		0.774	0.104644	110881	5374.84	0.740584	0.573212
JW0432	ECK0436	b0442	ybaV	4	25	7	A	13	A		0.984	46358.9	2765507400	0.453	44932	99187.6		1.05	53849.6	3760347600	0.511	67343	131787		0.851	54042.8	3045212100	0.488	52474	107529		51417.1	2529.72	3190355700	2.96213e+08	0.484	0.0168622	54916.3	6583.74		0.961667	0.0585216	112834	9777.3	0.740584	0.712195
JW0436	ECK0440	b0446	cof	4	27	7	A	14	A		0.846	46886.9	2517930900	0.437	44656	102188		1.271	63969.8	3043161900	0.589	63949	108572		0.967	60116.7	2667555900	0.535	53397	99807.5		56991.1	5173.08	2742882900	1.56229e+08	0.520333	0.0444872	54000.7	5577.58		1.028	0.126421	103522	2616.69	0.740584	0.76132
JW1936	ECK1950	b1952	dsrB	4	27	8	A	16	A		0.559	41836.7	2536355700	0.344	50603	147102		0.996	60670.8	2612034900	0.515	58893	114355		0.872	62802	2122013700	0.517	46282	89520.3		55103.2	6661.71	2423468100	1.52302e+08	0.458667	0.0573362	51926	3700.09		0.809	0.130024	116992	16674.5	0.740584	0.599132
JW0702	ECK0701	b0712	ybgK	4	25	9	A	17	A		0.715	45754.5	2380755600	0.406	52370	128990		1.017	59075.6	2144022300	0.539	50618	93910.9		0.732	55830.2	1896903900	0.467	43129	92353.3		53553.5	4010.45	2140560600	1.39687e+08	0.470667	0.0384375	48705.7	2833.83		0.821333	0.0979563	105085	11961.1	0.740584	0.608266
JW0779	ECK0784	b0795	ybhG	4	25	10	A	19	A		0.996	50402.4	1323081900	0.452	28282	62570.8		1.017	57071.2	1733826600	0.506	40080	79209.5		0.646	49153.3	1678331700	0.402	36125	89863.2		52209	2457.72	1578413400	1.28667e+08	0.453333	0.0300296	34829	3466.89		0.886333	0.120319	77214.5	7941.53	0.740584	0.656404
JW3067	ECK3087	b3096	yqjB	4	27	10	A	20	A		0.671	45114.1	2687094900	0.4	55843	139608		1.092	60410.9	2935369800	0.535	72872	136209		0.64	50928.4	2381569200	0.423	50137	118527		52151.1	4457.92	2668011300	1.60153e+08	0.452667	0.0416987	59617.3	6828.96		0.801	0.145775	131448	6534.46	0.740584	0.593208
JW0822	ECK0828	b0838	yliJ	4	25	11	A	21	A		0.635	40297.9	3253217400	0.358	65772	183721		0.829	49906.5	3239736300	0.453	77199	170417		0.559	47143.7	2992302000	0.39	61001	156413		45782.7	2856.01	3161751900	8.48143e+07	0.400333	0.0279066	67990.7	4805.75		0.674333	0.0803852	170184	7883.96	0.740584	0.4994
JW5892	ECK0143	b0144	yadB	4	27	11	A	22	A		0.752	49650.6	2959922700	0.419	60960	145489		1.413	68778	2321829900	0.638	59176	92752.4		0.747	55302.5	2510922600	0.466	56656	121579		57910.4	5673.49	2597558400	1.89226e+08	0.507667	0.0665641	58930.7	1248.5		0.970667	0.221171	119940	15245.9	0.740584	0.71886
JW0592	ECK0593	b0599	ybdH	4	29	1	A	1	B		0.639	43542.8	3362390100	0.391	70692	180798		0.969	53167.1	2114793900	0.518	36649	70751		1.096	57550.7	1611022500	0.592	30416	51378.4		51420.2	4136.98	2362735500	5.20554e+08	0.500333	0.0586922	45919	12516.5		0.901333	0.136194	100976	40301	0.740584	0.667513
JW3976	ECK4008	b4016	aceK	4	31	1	A	2	B		0.59	38601.6	2694002400	0.337	51089	151599		0.766	50960.3	2344389300	0.441	46215	104796		0.802	56466	1901207700	0.474	43404	91569.6		48676	5281.97	2313199800	2.29391e+08	0.417333	0.0412809	46902.7	2244.96		0.719333	0.0654964	115988	18210.3	0.861677	0.619833
JW0883	ECK0891	b0900	ycaN	4	29	2	A	3	B		0.594	37943.6	2358415800	0.352	45176	128341		0.72	46269	4266056700	0.401	66962	166988		0.619	49523.2	3193509600	0.422	55465	131434		44578.6	3447.96	3272660700	5.52109e+08	0.391667	0.0207391	55867.7	6292.3		0.644333	0.0385155	142254	12398.9	0.861677	0.555207
JW4011	ECK4043	b4051	qor	4	31	2	A	4	B		0.595	47021.7	2298003300	0.387	41285	106680		0.643	46459.7	2620458900	0.397	48080	121108		0.625	51121.7	2047261500	0.422	39489	93575.8		48201	1469.32	2321907900	1.65899e+08	0.402	0.0104083	42951.3	2616.22		0.621	0.014	107121	7951.01	0.861677	0.535101
JW1276	ECK1279	b1284	yciT	4	29	3	A	5	B		0.464	40640.5	3252051000	0.357	58867	164894		0.48	39097	3589869600	0.339	70429	207755		0.447	40959.6	2768155200	0.344	51490	149680		40232.4	575.117	3203358600	2.38455e+08	0.346667	0.00536449	60262	5511.53		0.463667	0.00952774	174110	17386.6	0.861677	0.399531
JW1648	ECK1652	b1656	sodB	4	31	3	A	6	B		0.621	41720.5	3896916300	0.344	78790	229041		0.647	47217.6	2722111200	0.408	55726	136583		0.626	49445.6	2255187600	0.41	45553	111105		46127.9	2295.65	2958071700	4.88391e+08	0.387333	0.0216744	60023	9832.31		0.631333	0.0079652	158910	35828.6	0.861677	0.544005
JW1508	ECK1508	b1515	lsrD	4	29	4	A	7	B		0.545	42431.7	2470166100	0.359	46520	129582		0.582	46691.8	2511332100	0.393	47361	120511		0.602	48551.1	2006905500	0.401	40099	99997.5		45891.5	1811.29	2329467900	1.61718e+08	0.384333	0.0128755	44660	2293.39		0.576333	0.0166966	116697	8750.72	0.861677	0.496613
JW1588	ECK1591	b1596	ynfM	4	29	5	A	9	B		0.563	45801.9	2388452400	0.381	43796	114950		0.754	57245	2438781300	0.44	41177	93584.1		0.836	65837.9	1562735700	0.544	30842	56694.9		56294.9	5803.37	2129989800	2.83999e+08	0.455	0.047648	38605	3954.45		0.717667	0.0808751	88409.7	17014.7	0.861677	0.618397
JW0273	ECK0278	b0279	yagM	4	31	5	A	10	B		0.599	46237.9	2822715900	0.399	51015	127857		0.694	50819.8	2439538200	0.42	43094	102605		0.639	57650.5	1761219000	0.472	34191	72438.6		51569.4	3315.79	2341157700	3.10351e+08	0.430333	0.0216974	42766.7	4859.43		0.644	0.0275379	100967	16018.9	0.861677	0.55492
JW0498	ECK0503	b0510	ybbV	4	31	6	A	12	B		0.482	57508.7	2077490700	0.451	39033	86547.7		0.593	47944.7	2468003400	0.374	41484	110920		0.573	59203.6	1955205000	0.457	34469	75424.5		54885.7	3504.81	2166899700	1.54635e+08	0.427333	0.0267229	38328.7	2055.45		0.549333	0.0341581	90964	10481.8	0.861677	0.473348
JW1759	ECK1768	b1770	ydjF	4	29	7	A	13	B		0.551	46358.9	2765507400	0.453	44932	99187.6		0.547	35632.7	4232578500	0.308	80927	262750		0.544	41655.5	3029167800	0.359	57337	159713		41215.7	3104.19	3342417900	4.51541e+08	0.373333	0.042467	61065.3	10556.8		0.547333	0.00202759	173884	47745	0.861677	0.471625
JW0658	ECK0653	b0661	miaB	4	31	7	A	14	B		0.582	46886.9	2517930900	0.437	44656	102188		0.72	53631.6	1380516300	0.399	26074	65348.4		0.677	58856.4	1132900200	0.415	22281	53689.2		53125	3464.56	1677115800	4.26441e+08	0.417	0.0110151	31003.7	6913.43		0.659667	0.040769	73741.7	14615.8	0.861677	0.56842
JW1968	ECK1985	b1990	erfK	4	29	8	A	15	B		0.557	42106.9	2792410200	0.364	57005	156607		0.856	65179.4	2547107100	0.508	47088	92692.9		0.722	64811.8	2246658300	0.521	42833	82213.1		57366	7630.32	2528725200	1.57813e+08	0.464333	0.0503068	48975.3	4198.53		0.711667	0.0864684	110504	23249.1	0.861677	0.613227
JW1045	ECK1043	b1058	yceO	4	31	8	A	16	B		0.579	41836.7	2536355700	0.344	50603	147102		0.75	54042.4	2646269100	0.446	50914	114157		0.618	57049.9	2055114000	0.46	38210	83065.2		50976.3	4651.57	2412579600	1.81527e+08	0.416667	0.0365574	46575.7	4183.8		0.649	0.0517397	114775	18488.3	0.861677	0.559228
JW0849	ECK0856	b0865	ybjP	4	29	9	A	17	B		0.574	45754.5	2380755600	0.406	52370	128990		0.692	46553.5	3492315900	0.39	59507	152582		0.543	46506.7	2496176100	0.379	42607	112420		46271.5	258.893	2789749200	3.5286e+08	0.391667	0.00783865	51494.7	4898.2		0.603	0.0453909	131331	11652.8	0.861677	0.519591
JW1152	ECK1152	b1165	ymgA	4	31	9	A	18	B		0.69	52901	2111478300	0.45	43322	96271.1		0.918	63607	2595477600	0.498	50192	100787		0.735	60491.5	2172969000	0.475	41094	86513.7		58999.8	3179.27	2293308300	1.52124e+08	0.474333	0.0138604	44869.3	2737.95		0.781	0.0697209	94524	4211.98	0.861677	0.67297
JW2030	ECK2039	b2045	wcaK	4	29	10	A	19	B		0.564	50402.4	1323081900	0.452	28282	62570.8		0.705	44458.1	3082850100	0.395	70045	177329		0.427	37211.9	3219705900	0.319	64530	202288		44024.2	3813.94	2541879300	6.10678e+08	0.388667	0.0385242	54285.7	13098.9		0.565333	0.0802545	147396	43020.3	0.861677	0.487135
JW1466	ECK1464	b1470	yddJ	4	31	11	A	22	B		0.518	49650.6	2959922700	0.419	60960	145489		0.822	53006	2629397700	0.459	59610	129869		0.453	42474.8	2329866900	0.342	45801	133921		48377.1	3106.07	2639729100	1.81955e+08	0.406667	0.0343333	55457	4843.7		0.597667	0.113725	136427	4679.89	0.861677	0.514996
JW1742	ECK1751	b1753	ynjA	4	31	12	A	24	B		0.723	45944.5	3111592500	0.422	65525	155273		1.295	62110.3	2428455600	0.575	60006	104358		0.84	56751	2137749300	0.488	48654	99700.8		54935.2	4754.16	2559265800	2.88632e+08	0.495	0.0443058	58061.7	4966.32		0.952667	0.174467	119777	17798.5	0.740584	0.70553
JW1842	ECK1854	b1853	yebK	4	25	1	B	1	C		0.449	46457.4	2859777900	0.424	48760	115000		0.988	56335	2426973300	0.5	57936	115872		0.934	54034.5	1903573800	0.483	52647	109000		52275.6	2983.95	2396775000	2.76445e+08	0.469	0.023029	53114.3	2659.17		0.790333	0.171377	113291	2160.05	0.740584	0.585308
JW2124	ECK2129	b2136	yohD	4	27	2	B	4	C		0.493	38260.3	3176129700	0.323	53215	164752		0.773	47383	3597381000	0.403	69585	172667		0.488	42913.3	2958535800	0.352	53896	153114		42852.2	2633.67	3244015500	1.87516e+08	0.359333	0.0233833	58898.7	5346.78		0.584667	0.0941777	163511	5678.72	0.946387	0.553321
JW2791	ECK2819	b2823	ppdC	4	25	3	B	5	C		0.495	40752.6	2561964300	0.326	41962	128718		0.512	43196.9	2774018700	0.344	47054	136785		0.496	43271.6	2269310400	0.344	40053	116433		42407.1	827.501	2535097800	1.46315e+08	0.338	0.006	43023	2089.48		0.501	0.00550757	127312	5916.94	0.946387	0.47414
JW2243	ECK2242	b2249	yfaY	4	27	3	B	6	C		0.474	36882.5	3160472400	0.324	57332	176951		0.489	39832.3	3525341400	0.337	65844	195383		0.451	39917.2	2681157600	0.333	50968	153057		38877.4	997.711	3122323800	2.4444e+08	0.331333	0.00384419	58048	4309.23		0.471333	0.0110504	175130	12252.2	0.946387	0.446064
JW5904	ECK1366	b1371	lomR	4	25	4	B	7	C		0.586	45977	2158095600	0.377	35906	95241.4		0.488	45701.6	2563104600	0.371	42243	113863		0.593	48042.5	1827243000	0.386	34192	88580.3		46573.7	738.708	2182814400	2.12784e+08	0.378	0.0043589	37447	2448.51		0.555667	0.0338936	99228.1	7565.67	0.946387	0.525876
JW2522	ECK2535	b2538	hcaE	4	27	4	B	8	C		0.579	40099.6	2552007600	0.34	44387	130550		0.707	47191.4	2929164300	0.391	51749	132350		0.661	54085.5	2016729900	0.444	39932	89936.9		47125.5	4037.52	2499300600	2.64712e+08	0.391667	0.0300241	45356	3445.51		0.649	0.0374344	117612	13847.5	0.946387	0.614205
JW0187	ECK0191	b0191	yaeJ	4	25	5	B	9	C		0.557	41891.7	2430419400	0.352	40470	114972		0.687	49099	3030607800	0.389	52924	136051		0.661	53857.8	1984882500	0.477	40572	85056.6		48282.8	3478.34	2481969900	3.02973e+08	0.406	0.037072	44655.3	4134.44		0.635	0.0397157	112027	14794.4	0.946387	0.600956
JW0312	ECK0318	b0320	yahF	4	25	6	B	11	C		0.526	45178.2	1970109900	0.361	30819	85371.2		0.606	47044.5	2513362500	0.389	40010	102853		0.581	52875.4	1660975200	0.427	28854	67573.8		48366	2318.14	2048149200	2.49138e+08	0.392333	0.0191253	33227.7	3438.28		0.571	0.0236291	85266.1	10184.5	0.946387	0.540387
JW0434	ECK0438	b0444	ybaX	4	25	7	B	13	C		0.475	34778.1	2998648800	0.291	47041	161653		0.592	40947.5	3543113700	0.348	59523	171043		0.5	48618.2	2275761600	0.404	42786	105906		41447.9	4003.12	2939174700	3.6706e+08	0.347667	0.0326207	49783.3	5022.35		0.522333	0.0355731	146201	20328.9	0.946387	0.494329
JW0536	ECK0539	b0548	ninE	4	27	7	B	14	C		0.495	39251.6	2549319300	0.321	42497	132389		0.62	44090.2	2808443700	0.362	50519	139555		0.456	46437.8	2133565200	0.367	38523	104967		43259.8	2115.6	2497109400	1.96562e+08	0.35	0.0145717	43846.3	3528.06		0.523667	0.0494649	125637	10540	0.946387	0.495591
JW2133	ECK2139	b2146	yeiT	4	27	8	B	16	C		0.727	73961	2718150300	0.619	42732	69033.9		0.843	77956.5	3013322400	0.672	50001	74406.2		0.583	65812.5	2723285700	0.527	45127	85630		72576.7	3573.34	2818252800	9.75461e+07	0.606	0.0423596	45953.3	2138.67		0.717667	0.0752005	76356.7	4889.12	0.946387	0.67919
JW0749	ECK0755	b0766	ybhA	4	25	9	B	17	C		0.451	36909.1	2318364000	0.322	36138	112230		0.253	37392.8	1187805600	0.296	19960	67432.4		0.249	40572.6	962188200	0.321	17666	55034.3		38291.5	1149.08	1489452600	4.19542e+08	0.313	0.0085049	24588	5812.84		0.317667	0.0666767	78232.2	17371.5	0.946387	0.300636
JW2411	ECK2413	b2418	pdxK	4	27	9	B	18	C		0.647	46625.5	2250163800	0.39	39949	102433		0.781	55703.2	2894791500	0.435	49448	113674		0.631	55542.2	2407008600	0.442	43939	99409.5		52623.6	2999.43	2517321300	1.9409e+08	0.422333	0.0162925	44445.3	2753.79		0.686333	0.0475582	105172	4339.42	0.946387	0.649537
JW0785	ECK0789	b0800	ybiB	4	25	10	B	19	C		0.501	42542.1	2552048100	0.331	47682	144054		0.744	53912.7	2173796100	0.43	40877	95062.8		0.584	53385.1	1896083100	0.433	36596	84517.3		49946.6	3705.4	2207309100	1.90101e+08	0.398	0.0335112	41718.3	3227.78		0.609667	0.0713123	107878	18342.5	0.946387	0.576981
JW3402	ECK3424	b3439	yhhW	4	27	10	B	20	C		0.672	46050.5	2421535500	0.403	47819	118658		0.831	55117	2816187300	0.446	56958	127709		0.58	49403.1	2435106600	0.406	48831	120273		50190.2	2646.7	2557609800	1.29348e+08	0.418333	0.0138604	51202.7	2892.46		0.694333	0.0733129	122213	2786.99	0.946387	0.657108
JW0193	ECK0197	b0197	metQ	4	27	11	B	22	C		0.676	50728.2	2839889700	0.392	51432	131204		1.095	69000.1	2616276600	0.556	59975	107869		0.634	53708.8	2523730500	0.429	51072	119049		57812.4	5659.66	2659965600	9.38451e+07	0.459	0.0496622	54159.7	2909.52		0.801667	0.147167	119374	6738.3	0.946387	0.758687
JW0892	ECK0900	b0909	ycaL	4	25	12	B	23	C		0.302	33710.8	7306812900	0.283	124948	441512		0.59	45316.3	7838486100	0.398	166549	418465		0.317	36916	7653535200	0.305	158183	518633		38647.7	3460.3	7599611400	1.55831e+08	0.328667	0.0352436	149893	12704.3		0.403	0.0936002	459537	30287.8	0.861677	0.347256
JW0409	ECK0413	b0419	yajO	4	27	12	B	24	C		0.778	48014.7	2563839900	0.407	50161	123246		1.177	61133.1	2608904700	0.558	65006	116498		0.762	52875.5	2201666400	0.46	50745	110315		54007.8	3829.04	2458137000	1.28893e+08	0.475	0.0442305	55304	4853.93		0.905667	0.135745	116686	3733.89	0.740584	0.670722
JW0645	ECK0643	b0650	hscC	4	29	1	B	1	D		0.542	37733.5	2762631900	0.345	48692	141136		1.038	51892.2	2584346400	0.521	59649	114489		0.897	49660.2	1944595800	0.477	50809	106518		46428.6	4395.06	2430524700	2.48356e+08	0.447667	0.0528814	53050	3355.62		0.825667	0.147558	120714	10467	0.740584	0.611476
JW1772	ECK1781	b1783	yeaG	4	31	1	B	2	D		0.507	33073.7	3493872000	0.314	61377	195468		0.652	37850.8	4001014800	0.359	88045	245251		0.522	38059.3	5679846000	0.345	118849	344490		36327.9	1628.25	4391577600	6.60562e+08	0.339333	0.0132958	89423.7	16605.1		0.560333	0.0460374	261736	43801.4	0.861677	0.482826
JW0884	ECK0892	b0901	ycaK	4	29	2	B	3	D		0.596	39512.9	2590559100	0.357	45132	126420		0.702	42317.1	3024324900	0.383	56285	146958		0.629	47298.9	2243421900	0.413	45559	110312		43043	2276.73	2619435300	2.25889e+08	0.384333	0.0161795	48992	3648.58		0.642333	0.0313174	127897	10604.5	0.946387	0.607896
JW4130	ECK4168	b4172	hfq	4	31	2	B	4	D		0.591	40683.7	3446688600	0.352	56062	159267		0.456	37548.5	3837279600	0.32	58210	181906		0.39	38538.1	3082685400	0.328	56018	170787		38923.4	925.322	3455551200	2.17878e+08	0.333333	0.0096148	56763.3	723.445		0.479	0.0591523	170653	6535.72	1	0.479
JW1372	ECK1374	b1378	ydbK	4	29	3	B	5	D		0.628	46183.1	2687346000	0.384	42253	110034		0.676	53175.7	2768825700	0.432	46366	107329		0.57	50233.1	2079173700	0.408	33536	82196.1		49863.9	2027.02	2511781800	2.17579e+08	0.408	0.0138564	40718.3	3782.35		0.624667	0.0306449	99852.9	8862.87	1	0.624667
JW1638	ECK1642	b1646	sodC	4	31	3	B	6	D		0.634	45065.3	2193109200	0.396	37015	93472.2		0.726	50147.5	2748347100	0.413	47403	114777		0.56	50229.3	2252877300	0.412	41142	99859.2		48480.7	1707.84	2398111200	1.75966e+08	0.407	0.00550757	41853.3	3019.78		0.64	0.0480139	102703	6312.44	1	0.64
JW1509	ECK1509	b1516	lsrB	4	29	4	B	7	D		0.553	43755.3	1944080100	0.369	33089	89672.1		0.54	46662.8	2325854700	0.384	38825	101107		0.648	50927.1	1707811200	0.414	32462	78410.6		47115.1	2082.64	1992582000	1.80054e+08	0.389	0.0132288	34792	2024.61		0.580333	0.0340408	89729.8	6551.88	1	0.580333
JW2801	ECK2829	b2833	ygdR	4	31	4	B	8	D		0.538	40507.3	2145779100	0.34	35897	105579		0.542	44615.2	2196085500	0.365	38455	105356		0.614	50685.6	1777568400	0.416	32934	79168.3		45269.3	2956.37	2039811000	1.31923e+08	0.373667	0.0223632	35762	1595.2		0.564667	0.0246937	96701.3	8766.74	1	0.564667
JW1592	ECK1595	b1600	mdtJ	4	29	5	B	9	D		0.556	43491.4	2207808000	0.361	36717	101709		0.607	45551.1	2598425100	0.367	45100	122888		0.704	57820.9	1698990300	0.485	33112	68272.2		48954.4	4472.9	2168407800	2.60391e+08	0.404333	0.0403705	38309.7	3551.08		0.622333	0.0434063	97623.2	15898.1	1	0.622333
JW0274	ECK0279	b0280	yagN	4	31	5	B	10	D		0.501	43394.6	1726176600	0.355	27005	76070.4		0.681	49850.9	2238238800	0.409	35777	87474.3		0.672	58191.1	1493180100	0.463	28144	60786.2		50478.9	4282.92	1819198500	2.20051e+08	0.409	0.0311769	30308.7	2753.87		0.618	0.0585577	74777	7731.3	1	0.618
JW1688	ECK1696	b1698	ydiR	4	29	6	B	11	D		0.426	38645.8	1920702600	0.306	29203	95434.6		0.636	47946.3	2477522700	0.374	38056	101754		0.621	56075.8	1654578900	0.446	30079	67441.7		47556	5035.4	2017601400	2.42454e+08	0.375333	0.04042	32446	2816.38		0.561	0.0676387	88210.1	10543.2	1	0.561
JW0507	ECK0512	b4507	ylbE	4	31	6	B	12	D		0.413	39499.3	1995608700	0.309	29428	95236.2		0.685	48895	2253295800	0.392	35862	91484.7		0.736	64459.8	1632816000	0.488	30997	63518.4		50951.4	7278.47	1960573500	1.79972e+08	0.396333	0.0517183	32095.7	1936.87		0.611333	0.100254	83413.1	10006.1	1	0.611333
JW1760	ECK1769	b1771	ydjG	4	29	7	B	13	D		0.47	38264.7	2389078800	0.321	38217	119056		0.642	42572.9	2629179000	0.363	46127	127072		0.597	54876	1807609500	0.45	34512	76693.3		45237.8	4976.96	2275289100	2.43896e+08	0.378	0.0379868	39618.7	3425.42		0.569667	0.0514987	107607	15629.1	1	0.569667
JW0676	ECK0677	b0689	ybfP	4	31	7	B	14	D		0.592	44829.2	1944586800	0.35	32269	92197.1		0.699	50737.1	2192075100	0.386	37725	97733.2		0.613	56658	1664287200	0.411	31061	75574.2		50741.4	3414.68	1933649700	1.52457e+08	0.382333	0.0177044	33685	2049.88		0.634667	0.0327329	88501.5	6658.28	1	0.634667
JW1983	ECK1994	b2001	yeeR	4	29	8	B	15	D		0.483	40902.8	2019690900	0.329	33008	100328		0.642	48365.1	2595359700	0.383	44644	116564		0.595	52788.8	2089833300	0.414	37106	89628		47352.2	3468.38	2234961300	1.81333e+08	0.375333	0.024835	38252.7	3407.6		0.573333	0.0471605	102173	7830.28	1	0.573333
JW1123	ECK1123	b1137	ymfD	4	31	8	B	16	D		0.56	42795.4	2350382400	0.357	38522	107905		0.754	52321.2	2625521400	0.433	45383	104811		0.61	52343.7	2029320900	0.436	37267	85474.8		49153.4	3179.05	2335074900	1.72278e+08	0.408667	0.0258478	40390.7	2522.32		0.641333	0.0581531	99396.7	7018.05	1	0.641333
JW0923	ECK0931	b0940	ycbS	4	29	9	B	17	D		0.587	43051.3	2633527800	0.37	47543	128495		0.723	47285.5	2840247000	0.386	54270	140596		0.538	47049.4	2190114900	0.397	41848	105411		45795.4	1373.73	2554629900	1.91778e+08	0.384333	0.00783865	47887	3590.05		0.616	0.0553384	124834	10320.7	1	0.616
JW1153	ECK1153	b1166	ymgB	4	31	9	B	18	D		0.571	39734.6	3094164900	0.35	56510	161457		0.555	38308.3	3890084400	0.323	76784	237721		0.574	47025.9	2803858200	0.394	56864	144325		41689.6	2699.72	3262702500	3.24692e+08	0.355667	0.0206908	63386	6699.78		0.566667	0.00589727	181168	28706	1	0.566667
JW1352	ECK1355	b1357	ydaS	4	31	10	B	20	D		0.558	44760.1	2245928400	0.353	38284	108453		0.501	47195.4	2649693600	0.393	46544	118433		0.577	50374.5	2107414800	0.395	40034	101352		47443.3	1625.49	2334345600	1.62665e+08	0.380333	0.0136789	41620.7	2512.97		0.545333	0.0228352	109413	4954.04	1	0.545333
JW3891	ECK3912	b3920	yiiQ	4	29	11	B	21	D		0.71	54619.4	2184119100	0.426	39423	92542.3		0.81	58055.3	2346692400	0.443	44887	101325		0.584	50641.8	2056550400	0.405	39393	97266.7		54438.8	2141.99	2195787300	8.39597e+07	0.424667	0.0109899	41234.3	1826.35		0.701333	0.0653843	97044.7	2537.81	1	0.701333
JW1467	ECK1465	b1471	yddK	4	31	11	B	22	D		0.638	47456.2	2118348000	0.392	39527	100834		0.93	56956.1	2157722100	0.489	51069	104436		0.593	47603.3	2031544800	0.4	41694	104235		50671.9	3142.41	2102538300	3.72721e+07	0.427	0.0310859	44096.7	3541.85		0.720333	0.105635	103168	1168.47	0.946387	0.681714
JW5604	ECK3770	b3778	rep	4	29	12	B	23	D		0.588	43514.6	3395768400	0.355	64480	181634		1.007	65153.2	2485035000	0.515	51509	100017		0.599	49930	2826857700	0.403	57514	142715		52866	6416.7	2902553700	2.65616e+08	0.424333	0.0474037	57834.3	3747.83		0.731333	0.13787	141455	23569	0.861677	0.630173
JW2040	ECK2049	b2055	wcaE	4	27	1	C	2	E		0.614	37019.9	2437774200	0.344	44379	129009		0.689	44159.4	3583242000	0.39	75005	192321		0.892	43963.4	1432539900	0.439	34593	78799.5		41714.2	2347.85	2484518700	6.21294e+08	0.391	0.0274287	51325.7	12172		0.731667	0.0830388	133376	32843.4	0.861677	0.63046
JW2125	ECK2130	b2137	yohF	4	27	2	C	4	E		0.514	40822.7	4036023000	0.349	66339	190083		0.653	46277.1	4708830600	0.381	76535	200879		0.543	47527.7	3663494100	0.383	67135	175287		44875.8	2058.48	4136115900	3.05885e+08	0.371	0.0110151	70003	3274.07		0.57	0.042336	188750	7417.81	1	0.57
JW2287	ECK2284	b2290	yfbQ	4	27	3	C	6	E		0.442	42733.7	3147790500	0.36	46062	127950		0.477	41257.9	3664624500	0.364	54011	148382		0.567	49871.7	2405302200	0.439	40171	91505.7		44621.1	2659.64	3072572400	3.65475e+08	0.387667	0.0256926	46748	4009.96		0.495333	0.0372305	122613	16634.2	1	0.495333
JW1366	ECK1367	b1372	stfR	4	25	4	C	7	E		0.546	41781	2170445400	0.372	33863	91029.6		0.464	44157.3	2674217700	0.367	44955	122493		0.651	50741.9	1845495900	0.428	34224	79962.6		45560.1	2680.2	2230053000	2.41081e+08	0.389	0.0195533	37680.7	3638.66		0.553667	0.0541182	97828.5	12739.5	1	0.553667
JW2546	ECK2560	b2562	yfhL	4	27	4	C	8	E		0.363	33645.8	2591632800	0.295	42185	143000		0.393	39428	3320021700	0.334	59175	177171		0.482	40433	2364663600	0.336	44266	131744		37835.6	2114.91	2758772700	2.88172e+08	0.321667	0.0133458	48542	5350.33		0.412667	0.035732	150638	13658.3	1	0.412667
JW0200	ECK0210	b0210	yafE	4	25	5	C	9	E		0.495	37735.6	2669659200	0.317	42156	132984		0.549	38308.6	2966172300	0.324	50175	154861		0.59	47561.6	2114352900	0.397	38774	97667.5		41201.9	3184.13	2583394800	2.49653e+08	0.346	0.0255799	43701.7	3380.71		0.544667	0.0275096	128504	16661.6	1	0.544667
JW0350	ECK0356	b0359	yaiX	4	25	6	C	11	E		0.495	44284.8	2286099000	0.358	35722	99782.1		0.589	42546.5	2815563600	0.341	47238	138528		0.635	57665.2	1764701100	0.473	34188	72279.1		48165.5	4776.3	2288787900	3.03361e+08	0.390667	0.0414581	39049.3	4118.21		0.573	0.0411987	103530	19216	1	0.573
JW2781	ECK2806	b2810	csdA	4	27	6	C	12	E		0.443	41846.6	2221457400	0.317	32415	102256		0.628	44026.7	2541099600	0.359	40834	113744		0.58	51463.1	1890171900	0.412	33862	82189.3		45778.8	2911	2217576300	1.87917e+08	0.362667	0.0274853	35703.7	2598.95		0.550333	0.0554266	99396.2	9220.49	1	0.550333
JW0435	ECK0439	b0445	ybaE	4	25	7	C	13	E		0.39	37423.6	2146945500	0.31	27765	89564.5		0.549	42790.2	2895933600	0.364	40309	110739		0.568	49326.7	2029402800	0.409	30111	73621		43180.2	3441.64	2357427300	2.71383e+08	0.361	0.0286182	32728.3	3850.36		0.502333	0.0564338	91308.2	10750.4	1	0.502333
JW0600	ECK0601	b0607	uspG	4	27	7	C	14	E		0.491	40342.1	2800088100	0.33	44728	135539		0.701	43626.7	3229020900	0.374	57679	154222		0.616	52495.6	2297679300	0.444	43241	97389.6		45488.1	3629.74	2775596100	2.69134e+08	0.382667	0.033193	48549.3	4584.97		0.602667	0.0609872	129050	16723.8	1	0.602667
JW0566	ECK0569	b0577	ybdG	4	25	8	C	15	E		0.474	44826.8	1905865200	0.36	28820	80055.6		0.623	44674.7	2489971500	0.378	40252	106487		0.551	52702.1	1823815800	0.417	30211	72448.4		47401.2	2650.82	2073217500	2.09719e+08	0.385	0.0168226	33094.3	3601.29		0.549333	0.0430207	86330.3	10314.7	1	0.549333
JW2164	ECK2170	b2176	rtn	4	27	8	C	16	E		0.528	42843.3	2150398800	0.344	36995	107544		0.688	48934.1	2561306400	0.406	45282	111532		0.599	52092.7	2060502300	0.43	37779	87858.1		47956.7	2714.42	2257402500	1.54152e+08	0.393333	0.0256212	40018.7	2641.38		0.605	0.0462853	102311	7317.7	1	0.605
JW0753	ECK0759	b0770	ybhI	4	25	9	C	17	E		0.581	40888.6	2373300000	0.339	39164	115528		0.636	43519.8	2880199800	0.368	48487	131758		0.565	49678.8	2362691700	0.397	42100	106045		44695.7	2604.75	2538730500	1.70762e+08	0.368	0.0167432	43250.3	2752.09		0.594	0.0215019	117777	7507.36	1	0.594
JW2422	ECK2424	b2429	murP	4	27	9	C	18	E		0.604	43491.1	2555100900	0.366	44851	122544		0.797	51662	2609984700	0.42	46900	111667		0.686	51788.9	2066755500	0.428	41292	96476.6		48980.6	2745.03	2410613700	1.72658e+08	0.404667	0.0194708	44347.7	1638.33		0.695667	0.0559236	110229	7559.17	1	0.695667
JW0801	ECK0807	b0817	mntR	4	25	10	C	19	E		0.5	38098.1	2922222600	0.316	50655	160301		0.601	39389.1	3279986100	0.328	59066	180079		0.486	46454.8	2493626400	0.385	47533	123462		41314	2597.29	2898611700	2.27309e+08	0.343	0.0212838	52418	3444.01		0.529	0.0362261	154614	16589.4	1	0.529
JW0005	ECK0006	b0006	yaaA	4	27	10	C	20	E		0.738	50156.8	2389041900	0.422	43003	101903		0.905	55977.2	2530800000	0.47	46066	98012.8		0.793	58279.7	2112943500	0.486	42725	87911.5		54804.6	2417.06	2344261800	1.22685e+08	0.459333	0.0192296	43931.3	1070.35		0.812	0.0491359	95942.4	4169.5	1	0.812
JW0829	ECK0835	b0845	ybjJ	4	25	11	C	21	E		0.722	40525.3	2396151900	0.385	39659	103010		0.657	39616.6	3140995500	0.374	52076	139241		0.72	45302.9	2464596900	0.417	43495	104305		41814.9	1763.62	2667248100	2.37696e+08	0.392	0.012897	45076.7	3670.68		0.699667	0.0213411	115519	11866.9	1	0.699667
JW0216	ECK0227	b0226	dinJ	4	27	11	C	22	E		0.608	38056.2	2853699300	0.36	48764	135456		0.743	45166.8	3524188500	0.396	77124	194758		0.493	41484.5	2712063600	0.339	57947	170935		41569.2	2053.07	3029983800	2.50462e+08	0.365	0.0166433	61278.3	8354.55		0.614667	0.0722457	167049	17228.9	0.946387	0.581713
JW0931	ECK0939	b0948	ycbY	4	25	12	C	23	E		0.678	47971.2	2627551800	0.423	50262	118823		1.276	64408.3	2151218700	0.59	49195	83381.4		0.711	53500.9	2292076800	0.472	50973	107994		55293.4	4828.91	2356949100	1.41279e+08	0.495	0.0495614	50143.3	516.682		0.888333	0.194067	103399	10485.8	0.861677	0.765456
JW0424	ECK0428	b0434	yajG	4	27	12	C	24	E		0.938	48708.7	1201233600	0.432	25582	59217.6		1.395	56023.3	1286469000	0.539	31913	59207.8		0.958	50568.6	1173762000	0.449	28646	63799.6		51766.9	2194.89	1220488200	3.39302e+07	0.473333	0.0331981	28713.7	1827.92		1.097	0.149112	60741.6	1528.96	0.740584	0.812421
JW0673	ECK0674	b0686	ybfF	4	29	1	C	1	F		0.683	43479.4	1746995400	0.381	32963	86517.1		1.213	59779.9	1642221000	0.56	39489	70516.1		1.026	56998.3	1266399900	0.534	34256	64149.8		53419.2	5034.37	1551872100	1.45905e+08	0.491667	0.05584	35569.3	1995.06		0.974	0.155191	73727.6	6653.55	0.740584	0.721329
JW1827	ECK1837	b1838	pphA	4	31	1	C	2	F		0.634	39786.2	2515644000	0.362	43973	121472		0.902	49900.5	2161135800	0.459	44607	97183		0.9	53264	1538057700	0.504	37595	74593.3		47650.2	4050.12	2071612500	2.85733e+08	0.441667	0.041898	42058.3	2239.16		0.812	0.0890019	97749.5	13535.8	0.861677	0.699682
JW1667	ECK1673	b1677	lpp	4	31	2	C	4	F		0.473	34399.1	2694872700	0.323	43614	135028		0.509	39141.4	3587088600	0.342	64612	188924		0.49	39704.9	2125333800	0.349	40157	115063		37748.5	1682.57	2802431700	4.25386e+08	0.338	0.00776745	49461	7640.95		0.490667	0.0103976	146338	22059	1	0.490667
JW1403	ECK1399	b1406	ydbC	4	29	3	C	5	F		0.502	37588	2499995700	0.323	39866	123424		0.474	40765.6	2739057300	0.339	44917	132499		0.615	49599.7	2022267600	0.416	37172	89355.8		42651.1	3593.37	2420440200	2.10708e+08	0.359333	0.0287073	40651.7	2270.04		0.530333	0.0430981	115093	13132.4	1	0.530333
JW1317	ECK1320	b1324	tpx	4	31	3	C	6	F		0.497	40132.5	2269714500	0.344	35597	103480		0.591	47547	2897347500	0.391	44091	112765		0.601	51268.5	2035311300	0.428	34597	80834.1		46316	3273.07	2400791100	2.57334e+08	0.387667	0.0243059	38095	3011.87		0.563	0.033126	99026.2	9482.72	1	0.563
JW1517	ECK1517	b1524	yneH	4	29	4	C	7	F		0.522	41990.3	2493558900	0.357	43050	120588		0.595	47884.3	2993519700	0.392	52638	134281		0.653	53579.9	2074982400	0.437	40061	91672.8		47818.2	3345.78	2520687000	2.65506e+08	0.395333	0.0231541	45249.7	3793.6		0.59	0.037899	115514	12558.8	1	0.59
JW1598	ECK1601	b1606	folM	4	29	5	C	9	F		0.357	31620.5	2908894500	0.271	48472	178863		0.515	38536.7	3755062800	0.327	69149	211465		0.522	44050.6	2630413800	0.379	54602	144069		38069.2	3595.86	3098123700	3.38164e+08	0.325667	0.031184	57407.7	6131.57		0.464667	0.0538712	178132	19459.1	1	0.464667
JW1689	ECK1697	b1699	ydiS	4	29	6	C	11	F		0.513	39858.3	1913816700	0.327	26457	80908.3		0.609	47271.8	2448677700	0.371	35290	95121.3		0.594	50456.7	1703024100	0.42	28568	68019		45862.3	3139.62	2021839500	2.21925e+08	0.372667	0.0268597	30105	2663.16		0.572	0.0298161	81349.5	7826.86	1	0.572
JW0532	ECK0535	b0544	ybcK	4	31	6	C	12	F		0.333	35183.9	1720922400	0.284	21625	76144.4		0.464	44846.8	1554329700	0.34	20612	60623.5		0.486	52592.1	1255356900	0.415	20270	48843.4		44207.6	5035.48	1510203000	1.36196e+08	0.346333	0.0379488	20835.7	406.828		0.427667	0.0477575	61870.4	7905.74	1	0.427667
JW1763	ECK1772	b1774	ydjJ	4	29	7	C	13	F		0.884	58254.3	1732860000	0.531	34480	64934.1		0.611	44674.2	2381821200	0.362	38746	107033		0.567	50151.3	1790181000	0.412	32340	78495.1		51026.6	3944.59	1968287400	2.07428e+08	0.435	0.0501232	35188.7	1882.89		0.687333	0.0991503	83487.5	12406.7	1	0.687333
JW0724	ECK0723	b4515	ybgT	4	31	7	C	14	F		0.456	40736.9	2505773700	0.331	39086	118085		0.571	42684.1	2615981400	0.352	45787	130077		0.63	48685.3	1834731900	0.411	37451	91121.7		44035.4	2391.93	2318829000	2.4413e+08	0.364667	0.0239467	40774.7	2550.22		0.552333	0.0510892	113094	11518.8	1	0.552333
JW0054	ECK0056	b0055	djlA	4	29	8	C	15	F		0.478	38125.3	2548868400	0.327	43024	131572		0.565	41953.1	3104956800	0.342	52931	154769		0.535	46561.7	2249549100	0.393	43319	110226		42213.4	2438.83	2634458100	2.50616e+08	0.354	0.019975	46424.7	3254.28		0.526	0.0255147	132189	12862	1	0.526
JW0966	ECK0974	b0983	yccZ	4	29	9	C	17	F		0.529	41256	2322458100	0.343	39956	116490		0.665	45060.8	2449354500	0.381	44595	117047		0.616	48459.1	1936393200	0.401	37865	94426.4		44925.3	2080.45	2236068600	1.54251e+08	0.375	0.0170098	40805.3	1988.66		0.603333	0.0397674	109321	7449.1	1	0.603333
JW1156	ECK1156	b4520	ymgF	4	31	9	C	18	F		0.513	42685.2	2488538700	0.342	41466	121246		0.683	47451.6	3026544300	0.363	51942	143091		0.556	43688.6	2056418100	0.363	39834	109736		44608.5	1450.78	2523833700	2.80607e+08	0.356	0.007	44414	3793.37		0.584	0.0510327	124691	9781.73	1	0.584
JW2329	ECK2326	b2332	yfcO	4	29	10	C	19	F		0.583	44599.8	3484761300	0.385	54241	140886		0.718	47759.7	4059061200	0.406	67910	167266		0.602	47250.9	3062929500	0.413	54420	131768		46536.8	979.578	3535584000	2.88679e+08	0.401333	0.00841295	58857	4526.79		0.634333	0.0421914	146640	10643.7	1	0.634333
JW1369	ECK1370	b1375	ynaE	4	31	10	C	20	F		0.522	35855.2	3403088100	0.334	56287	168524		0.534	37670.9	4092025500	0.321	74697	232701		0.602	43064.7	3254940900	0.369	69529	188425		38863.6	2164.97	3583351500	2.57907e+08	0.341333	0.0143333	66837.7	5482.23		0.552667	0.0249087	196550	18966.4	1	0.552667
JW4110	ECK4145	b4149	blc	4	29	11	C	21	F		0.547	41476.7	3128508000	0.353	59119	167476		0.663	43273.8	3298879800	0.367	64431	175561		0.59	46671.1	2498242500	0.4	54309	135772		43807.2	1523.04	2975210100	2.43502e+08	0.373333	0.0139324	59286.3	2923.17		0.6	0.0338575	159603	12141.8	1	0.6
JW1503	ECK1503	b1510	ydeK	4	31	11	C	22	F		0.694	51156.1	2266588800	0.417	44002	105520		0.768	53227.7	2294149500	0.438	48787	111386		0.66	50234.1	2181638700	0.416	48393	116329		51539.3	885.16	2247459000	3.38582e+07	0.423667	0.00717248	47060.7	1533.56		0.707333	0.0318817	111079	3124.05	0.946387	0.669411
JW1849	ECK1861	b1860	ruvB	4	29	12	C	23	F		0.73	42322.4	3395512800	0.396	53679	135553		0.991	56226.4	3405794400	0.501	61322	122399		0.706	48413.1	3048939000	0.44	53382	121323		48987.3	4024	3283415400	1.17276e+08	0.445667	0.030443	56127.7	2598.58		0.809	0.0912634	126425	4574.59	0.861677	0.697097
JW2045	ECK2054	b2060	wzc	4	27	1	D	2	G		0.617	43862.1	2268590400	0.376	39869	106035		0.932	55777.2	2152161000	0.501	44023	87870.3		1.054	59586.9	1395675900	0.553	35457	64117.5		53075.4	4736.11	1938809100	2.73639e+08	0.476667	0.0525241	39783	2473.17		0.867667	0.130187	86007.5	12136.2	0.861677	0.747648
JW1980	ECK1990	b1998	yoeE	4	25	2	D	3	G		0.607	55056.2	2250753300	0.437	37790	86476		0.684	59711.8	2403304200	0.48	43974	91612.5		0.929	66530.6	1601131500	0.549	34079	62074.7		60432.9	3331.93	2085063000	2.45941e+08	0.488667	0.0326207	38614.3	2886.02		0.74	0.097079	80054.4	9111.32	0.946387	0.700326
JW2153	ECK2159	b2166	yeiC	4	27	2	D	4	G		0.621	52741.4	2195554500	0.445	36838	82782		0.503	44722.9	2529341100	0.362	39733	109760		0.65	52984.1	1873296000	0.427	33266	77906.3		50149.5	2714.19	2199397200	1.89394e+08	0.411333	0.025208	36612.3	1870.27		0.591333	0.0449531	90149.3	9905.67	1	0.591333
JW2339	ECK2336	b2342	yfcY	4	27	3	D	6	G		0.475	38935.5	2605701600	0.332	42553	128172		0.61	41953.7	3312278100	0.349	54736	156837		0.604	49860.4	2346382800	0.409	43652	106729		43583.2	3257.3	2754787500	2.88622e+08	0.363333	0.0233548	46980.3	3890.79		0.563	0.0440341	130579	14514.9	1	0.563
JW1540	ECK1540	b1547	stfQ	4	25	4	D	7	G		0.594	49120	2075343300	0.403	35588	88307.7		0.629	49724.3	2285588700	0.401	39338	98099.8		0.711	56242.6	1756921500	0.45	33218	73817.8		51695.6	2280.17	2039284500	1.53674e+08	0.418	0.0160104	36048	1781.6		0.644667	0.0346715	86741.7	7053.2	1	0.644667
JW2561	ECK2575	b2577	yfiE	4	27	4	D	8	G		0.535	42723.9	2259557100	0.35	35505	101443		0.715	49459.6	2291988600	0.416	38068	91509.6		0.774	56144.2	1694353500	0.473	31383	66348.8		49442.6	3874.13	2081966400	1.94032e+08	0.413	0.0355387	34985.3	1947.21		0.674667	0.0718803	86433.8	10443.8	1	0.674667
JW2705	ECK2730	b2735	ygbI	4	27	5	D	10	G		0.425	34867.3	2455465500	0.291	39117	134423		0.682	45505.3	2526678000	0.38	44041	115897		0.666	51310.5	1641688200	0.442	33277	75287.3		43894.4	4814.59	2207943900	2.83873e+08	0.371	0.0438216	38811.7	3111.05		0.591	0.0831284	108536	17463.2	1	0.591
JW0444	ECK0448	b0454	ybaZ	4	25	7	D	13	G		0.418	37379.6	2579174100	0.297	39610	133367		0.65	44438.8	2926660500	0.363	51814	142738		0.586	47482.3	2039011200	0.393	41048	104448		43100.2	2992.2	2514948600	2.58247e+08	0.351	0.0283549	44157.3	3850.77		0.551333	0.0691793	126851	11523.6	1	0.551333
JW0605	ECK0606	b0613	citG	4	27	7	D	14	G		0.406	34632	2448054900	0.301	38546	128060		0.475	36300.1	3618828900	0.313	62876	200882		0.456	39666.1	2180187000	0.339	42604	125676		36866	1480.51	2749023600	4.41724e+08	0.317667	0.0112151	48008.7	7525.4		0.445667	0.0205778	151539	24681	1	0.445667
JW0621	ECK0619	b0626	ybeM	4	25	8	D	15	G		0.55	51310.6	2187201600	0.404	36601	90596.5		0.689	55287.3	2448344700	0.442	43185	97703.6		0.732	62628.1	1909572300	0.503	37596	74743.5		56408.7	3314.85	2181706200	1.55554e+08	0.449667	0.0288348	39127.3	2049.06		0.657	0.0549212	87681.2	6786.4	1	0.657
JW5378	ECK2308	b2314	dedD	4	27	8	D	16	G		0.608	48741.4	3486102300	0.427	58172	136234		0.631	50886	4322844000	0.433	77617	179254		0.725	56151	3125232000	0.477	61676	129300		51926.1	2201.29	3644726100	3.54702e+08	0.445667	0.0157621	65821.7	5983.78		0.654667	0.035788	148263	15624.4	1	0.654667
JW0771	ECK0777	b0788	ybhN	4	25	9	D	17	G		0.448	38915.8	2093134500	0.308	32361	105068		0.481	40363.1	2376664200	0.325	39250	120769		0.598	50785.7	1537472700	0.402	28903	71898		43354.9	3738.84	2002423800	2.46463e+08	0.345	0.0289194	33504.7	3041.17		0.509	0.0455082	99245.1	14405.2	1	0.509
JW2431	ECK2433	b2438	yffI	4	27	9	D	18	G		0.52	41111.7	2291777100	0.347	39364	113441		0.655	41354.4	2641764600	0.344	46262	134483		0.695	51188.8	1918403100	0.431	40024	92863.1		44551.7	3319.34	2283981600	2.08853e+08	0.374	0.0285132	41883.3	2197.61		0.623333	0.0529413	113596	12014.7	1	0.623333
JW0803	ECK0809	b0819	ybiS	4	25	10	D	19	G		0.527	41586.9	1959964200	0.348	36607	105193		0.713	49552.8	2196714600	0.396	40289	101740		0.752	51911	1557629100	0.439	32932	75015.9		47683.6	3123.42	1904769300	1.86541e+08	0.394333	0.0262827	36609.3	2123.78		0.664	0.069419	93982.8	9535.65	1	0.664
JW0010	ECK0011	b0011	yaaW	4	27	10	D	20	G		0.545	43878	2279423700	0.364	38740	106429		0.788	51741.8	2644263000	0.421	47248	112228		0.842	56012.3	2023896600	0.483	42347	87674.9		50544	3553.71	2315861100	1.80009e+08	0.422667	0.0343624	42778.3	2465.5		0.725	0.09134	102111	7409.4	1	0.725
JW0437	ECK0441	b0447	ybaO	4	27	12	D	24	G		1.073	55526.6	2268234900	0.498	53923	108279		1.508	67383.4	2031304500	0.636	54300	85377.4		0.898	57717.7	2025765900	0.51	52330	102608		60209.2	3642.44	2108435100	7.99159e+07	0.548	0.0441362	53517.7	603.724		1.15967	0.181345	98754.8	6886.15	0.740584	0.858831
JW3140	ECK3161	b3172	argG	4	31	1	D	2	H		0.471	39224.2	2773370700	0.35	43436	124103		0.99	57220.3	2531952900	0.569	42974	75525.5		1.161	56086.2	1451517300	0.597	31512	52783.9		50843.6	5818.88	2252280300	4.06402e+08	0.505333	0.0780861	39307.3	3899.95		0.874	0.207458	84137.4	21033.5	0.861677	0.753106
JW0938	ECK0946	b0955	ycbZ	4	29	2	D	3	H		0.584	39392.2	3525312600	0.337	61599	182786		0.783	51585.8	3569347800	0.433	70111	161919		0.859	54346.3	2157106500	0.481	50194	104353		48441.5	4594.27	3083922300	4.63582e+08	0.417	0.042332	60634.7	5769.72		0.742	0.0819898	149686	23453.2	0.946387	0.702219
JW0599	ECK0600	b0606	ahpF	4	31	2	D	4	H		0.598	44836	1990216800	0.373	31897	85514.7		0.722	53457.4	2318614200	0.426	37929	89035.2		0.818	61472.2	1623637800	0.508	31230	61476.4		53255.2	4803.5	1977489600	2.00723e+08	0.435667	0.0392697	33685.3	2130.55		0.712667	0.0636798	78675.4	8659.38	1	0.712667
JW1446	ECK1445	b1451	yncD	4	29	3	D	5	H		0.492	36537.7	2435100300	0.317	38591	121738		0.512	39329.1	2685476700	0.342	43749	127921		0.622	46726.8	2013195600	0.408	36585	89669.1		40864.5	3039.9	2377924200	1.96165e+08	0.355667	0.0271437	39641.7	2133.75		0.542	0.0404145	113109	11855.3	1	0.542
JW1519	ECK1519	b1526	yneJ	4	29	4	D	7	H		0.374	34552.6	2768257800	0.296	46957	158639		0.434	37695.3	3334068000	0.317	61250	193218		0.435	36061.7	2461596300	0.313	49541	158278		36103.2	907.46	2854640700	2.55537e+08	0.308667	0.00643774	52582.7	4397.4		0.414333	0.0201687	170045	11586.9	1	0.414333
JW2819	ECK2849	b2851	ygeG	4	31	4	D	8	H		0.398	30501.6	2882266200	0.28	42660	152357		0.506	36149.8	3500211600	0.317	66931	211139		0.581	42041.7	2621222100	0.371	53067	143038		36231	3331.58	3001233300	2.60621e+08	0.322667	0.0264218	54219.3	7030.08		0.495	0.0531131	168845	21317.6	1	0.495
JW1690	ECK1698	b1700	ydiT	4	29	6	D	11	H		0.468	40038.4	3452698800	0.33	54249	164391		0.559	45356.8	3424830300	0.384	55848	145438		0.627	49795.5	2418823800	0.42	47410	112881		45063.6	2820.44	3098784300	3.40075e+08	0.378	0.0261534	52502.3	2587.67		0.551333	0.0460591	140903	15041.5	1	0.551333
JW1770	ECK1779	b1781	yeaE	4	29	7	D	13	H		0.496	39382.4	2353268700	0.338	37480	110888		0.486	37836	3228142500	0.303	58398	192733		0.674	46871.9	2143877400	0.409	44754	109423		41363.4	2790.18	2575096200	3.32071e+08	0.35	0.0311823	46877.3	6131.13		0.552	0.0610683	137681	27529	1	0.552
JW0173	ECK0177	b0178	hlpA	4	29	8	D	15	H		0.491	37906.8	2547763200	0.327	43886	134208		0.498	35986.9	3239517600	0.304	61050	200822		0.634	41059.6	2088719100	0.371	46148	124388		38317.8	1478.7	2625333300	3.34463e+08	0.334	0.0196554	50361.3	5384.08		0.541	0.0465439	153139	24009.4	1	0.541
JW1128	ECK1128	b1142	ymfH	4	31	8	D	16	H		0.498	41372.2	1996990200	0.342	31777	92915.2		0.667	50771.1	2787786000	0.41	49116	119795		0.767	52937.6	1771106400	0.465	36661	78840.9		48360.3	3549.59	2185294200	3.08222e+08	0.405667	0.0355731	39184.7	5161.94		0.644	0.0785005	97183.7	12013.6	1	0.644
JW1020	ECK1023	b1037	csgG	4	29	9	D	17	H		0.647	52781.8	1139368500	0.398	17487	43937.2		0.731	55736.4	1414355400	0.418	23626	56521.5		0.972	64169.6	977315400	0.513	20031	39046.8		57562.6	3411.85	1177013100	1.27559e+08	0.443	0.035473	20381.3	1780.81		0.783333	0.0974001	46501.8	5204.96	1	0.783333
JW1162	ECK1161	b1173	ycgI	4	31	9	D	18	H		0.556	48078.3	1845362700	0.407	32261	79265.4		0.611	43327.9	2532501000	0.363	44040	121322		0.784	51467.8	1796651100	0.448	38396	85705.4		47624.6	2360.7	2058171600	2.37581e+08	0.406	0.0245425	38232.3	3401.29		0.650333	0.0686934	95431	13078.5	1	0.650333
JW2479	ECK2490	b2494	yfgC	4	29	10	D	19	H		0.517	43974.6	2110167900	0.361	34977	96889.2		0.788	51941.6	2585735100	0.419	46023	109840		0.937	57709.3	1788498900	0.503	40467	80451.3		51208.5	3981.75	2161467300	2.31567e+08	0.427667	0.0412203	40489	3188.72		0.747333	0.122937	95726.9	8503.7	1	0.747333
JW1092	ECK1092	b1106	ycfN	4	29	11	D	21	H		0.593	46611.3	2273580900	0.386	46309	119972		0.858	54160.1	2067458400	0.443	47332	106844		0.801	54168	1696649400	0.461	42827	92900.2		51646.5	2517.6	2012562900	1.68792e+08	0.43	0.0226053	45489.3	1363.53		0.750667	0.0805323	106572	7815.99	1	0.750667
JW3786	ECK3808	b3813	uvrD	4	29	12	D	23	H		0.709	49425.2	3334107600	0.415	68113	164128		0.906	60704.4	3116628000	0.492	65903	133949		0.764	56122.9	2529626400	0.477	58150	121908		55417.5	3275.06	2993454000	2.40261e+08	0.461333	0.0235679	64055.3	3020.8		0.793	0.0586884	139995	12557.1	0.861677	0.68331
JW1859	ECK1871	b1870	yecO	4	25	1	E	1	I		0.823	58959.6	2683866600	0.476	55427	116443		1.33	73487	2407902300	0.651	70492	108283		1.291	73020.2	1914255900	0.626	61610	98418.5		68488.9	4766.56	2335341600	2.2511e+08	0.584333	0.0546453	62509.7	4372.09		1.148	0.16289	107715	5211.04	0.740584	0.85019
JW2049	ECK2058	b2064	asmA	4	27	1	E	2	I		0.538	46651.3	2215323900	0.36	30051	83475		0.855	62366.9	2371522500	0.495	39765	80333.3		1.135	67242.6	1405945800	0.573	30499	53226.9		58753.6	6212.68	1997597400	2.99242e+08	0.476	0.0622174	33438.3	3165.98		0.842667	0.172449	72345.1	9602.02	0.861677	0.726106
JW2649	ECK2668	b2674	nrdI	4	25	2	E	3	I		0.582	42867.9	2346176700	0.361	35172	97429.4		0.578	40786.5	2950264800	0.347	52168	150340		0.628	49426.4	2056147200	0.427	43412	101667		44360.2	2603.35	2450862900	2.63363e+08	0.378333	0.0246667	43584	4907.08		0.596	0.0160416	116479	16974.7	0.946387	0.564047
JW2160	ECK2166	b2172	yeiQ	4	27	2	E	4	I		0.542	38889.7	2675027700	0.332	42892	129193		0.689	45172.3	3009685500	0.38	51191	134713		0.622	50283.9	2340415800	0.42	45568	108495		44782	3295	2675043000	1.93202e+08	0.377333	0.0254384	46550.3	2445.55		0.617667	0.0424905	124134	7979.98	1	0.617667
JW0527	ECK0532	b4508	ybcD	4	25	3	E	5	I		0.501	41227.4	2196685800	0.35	34394	98268.6		0.555	44000	2839525200	0.362	46934	129652		0.702	48653.2	2267261100	0.417	43195	103585		44626.9	2166.44	2434490700	2.03539e+08	0.376333	0.0206263	41507.7	3717		0.586	0.0600583	110502	9697.25	1	0.586
JW2376	ECK2375	b2379	yfdZ	4	27	3	E	6	I		0.419	35259.8	2585757600	0.296	39822	134534		0.598	40832.7	2918052000	0.339	47962	141481		0.626	48034	2089085400	0.402	39890	99228.9		41375.5	3697.58	2530965000	2.40865e+08	0.345667	0.0307806	42558	2702.07		0.547667	0.0648391	125081	13080.8	1	0.547667
JW1551	ECK1553	b1559	ydfT	4	25	4	E	7	I		0.395	37731	2546692200	0.334	42065	125943		0.534	40078.2	2663115300	0.354	49408	139571		0.484	44082.9	2374612200	0.373	48391	129735		40630.7	1854.34	2528139900	8.37987e+07	0.353667	0.0112596	46621.3	2297.01		0.471	0.0406489	131749	4060.87	1	0.471
JW2565	ECK2579	b2581	yfiF	4	27	4	E	8	I		0.449	36672.4	2889894600	0.303	44100	145545		0.585	42058.5	2954285100	0.349	50273	144049		0.585	44954.4	2145556800	0.38	41068	108074		41228.4	2426.56	2663245500	2.59511e+08	0.344	0.0223681	45147	2708.33		0.539667	0.0453333	132556	12248.6	1	0.539667
JW0213	ECK0224	b0223	yafJ	4	25	5	E	9	I		0.428	37281.9	1941354900	0.307	29205	95130.3		0.525	44095	2197125000	0.36	35572	98811.1		0.706	53759.2	1596406500	0.441	30115	68288		45045.3	4780.26	1911628800	1.74048e+08	0.369333	0.0389629	31630.7	1988.1		0.553	0.0814637	87409.8	9619.77	1	0.553
JW2736	ECK2761	b2766	ygcN	4	27	5	E	10	I		0.452	37442	3051935100	0.323	47691	147650		0.576	43295.8	2936628000	0.378	56415	149246		0.548	39971.8	2048618700	0.35	41966	119903		40236.5	1695.02	2679060600	3.16974e+08	0.350333	0.015878	48690.7	4200.91		0.525333	0.037547	138933	9526.22	1	0.525333
JW0373	ECK0377	b0382	yaiB	4	25	6	E	11	I		0.478	39967.1	3057903900	0.309	45867	148437		0.783	61791.5	2877908400	0.472	52274	110750		0.759	60695.3	2259626400	0.466	43207	92718.9		54151.3	7099.15	2731812900	2.41743e+08	0.415667	0.0533615	47116	2690.89		0.673333	0.0979121	117302	16414.6	1	0.673333
JW2833	ECK2861	b2865	ygeR	4	27	6	E	12	I		0.473	42346.4	2017513800	0.346	31829	91991.3		-0.993	61640.7	2433601800	0.524	39866	76080.2		0.894	60615.4	1842918300	0.525	36089	68741		54867.5	6267.54	2098011300	1.75201e+08	0.465	0.0595007	35928	2321.48		0.124667	0.571896	78937.5	6862.17	1	0.124667
JW0619	ECK0617	b0624	crcB	4	27	7	E	14	I		0.533	48440.6	1996906500	0.379	31835	83997.4		0.585	52040.7	2369714400	0.414	38686	93444.4		0.834	61533.8	1763404200	0.522	31135	59645.6		54005	3905.21	2043341700	1.7656e+08	0.438333	0.0430362	33885.3	2408.82		0.650667	0.0928876	79029.1	10068.2	1	0.650667
JW0626	ECK0624	b0631	ybeD	4	25	8	E	15	I		0.747	61363.4	1624979700	0.504	27156	53881		0.675	59633.6	1899027900	0.478	33038	69117.2		0.794	61867.4	1596422700	0.518	31853	61492.3		60954.8	676.461	1706810100	9.64618e+07	0.5	0.0117189	30682.3	1796.04		0.738667	0.0346041	61496.8	4398.31	1	0.738667
JW2314	ECK2311	b2317	dedA	4	27	8	E	16	I		0.92	57451.4	1366852500	0.514	27068	52661.5		0.673	48533.7	2149488000	0.395	39035	98822.8		0.984	59170.9	1390828500	0.51	31419	61605.9		55052	3296.74	1635723000	2.56976e+08	0.473	0.0390171	32507.3	3497.17		0.859	0.0948174	71030	14134.2	1	0.859
JW0772	ECK0778	b0789	ybhO	4	25	9	E	17	I		0.457	35836.4	2472069600	0.303	40255	132855		0.494	36169.5	3522320100	0.302	67575	223758		0.77	44134.7	1725981300	0.396	40490	102247		38713.5	2712.31	2573457000	5.2103e+08	0.333667	0.031168	49440	9067.75		0.573667	0.098746	152954	36488.3	1	0.573667
JW2440	ECK2451	b2456	cchB	4	27	9	E	18	I		0.473	37573.3	2654172900	0.306	42259	138101		0.598	41124.1	2900636100	0.343	50514	147271		0.82	50486.8	1850663700	0.441	40630	92131.5		43061.4	3851.62	2468490900	3.17001e+08	0.363333	0.0402754	44467.7	3059.52		0.630333	0.101466	125835	17058.2	1	0.630333
JW0806	ECK0812	b0822	ybiV	4	25	10	E	19	I		0.515	39483	2025229500	0.323	34314	106235		0.668	46555.9	2047652100	0.369	40711	110328		0.838	51346.4	1431944100	0.444	36525	82263.5		45795.1	3445.74	1834941900	2.01603e+08	0.378667	0.0352625	37183.3	1875.76		0.673667	0.0932851	99608.9	8752.8	1	0.673667
JW0065	ECK0067	b0066	thiQ	4	27	10	E	20	I		0.582	41615.8	2390226300	0.347	40428	116507		0.743	47893	2288712600	0.408	43570	106789		0.859	52238.2	1513736100	0.47	35553	75644.7		47249	3083.26	2064225000	2.768e+08	0.408333	0.0355074	39850.3	2332.26		0.728	0.080314	99647	12324.7	1	0.728
JW0308	ECK0314	b0316	yahB	4	27	11	E	22	I		0.676	47411.1	2472244200	0.385	44564	115751		0.724	50842.3	2153907000	0.424	42843	101045		0.752	53249.8	1689654600	0.466	41098	88193.1		50501.1	1694.12	2105268600	2.27219e+08	0.425	0.023388	42835	1000.56		0.717333	0.0221911	101663	7961.17	0.946387	0.678875
JW5898	ECK0958	b0967	yccW	4	25	12	E	23	I		0.757	41413.8	2468210400	0.389	43754	112478		0.856	45510.8	2248650900	0.414	53022	128072		0.694	45147.1	1963881000	0.406	47643	117347		44023.9	1309.28	2226914100	1.45992e+08	0.403	0.00737111	48139.7	2686.94		0.769	0.0471487	119299	4606.28	0.861677	0.66263
JW0443	ECK0447	b0453	ybaY	4	27	12	E	24	I		1.084	60560.4	1719475200	0.522	40543	77668.6		1.432	65110.9	1829880900	0.608	46351	76235.2		0.886	57445.5	1843168500	0.514	44612	86793.8		61038.9	2225.71	1797508200	3.92046e+07	0.548	0.0300888	43835.3	1721.01		1.134	0.159587	80232.5	3306.62	0.740584	0.839822
JW0735	ECK0741	b0752	zitB	4	29	1	E	1	J		0.74	46823.8	1963520100	0.422	37467	88784.4		1.128	56116	2038613400	0.54	48541	89890.7		1.012	53945.4	1750138200	0.512	45293	88462.9		52295.1	2806.46	1917423900	8.64063e+07	0.491333	0.0355965	43767	3286.58		0.96	0.114984	89046	432.446	0.740584	0.710961
JW1241	ECK1243	b1249	cls	4	31	1	E	2	J		0.483	34531.8	2802333600	0.284	49080	172817		0.807	44771.9	2189981700	0.398	48792	122593		0.809	48131	1438013700	0.439	37943	86430.5		42478.3	4089.83	2143443000	3.94532e+08	0.373667	0.0463693	45271.7	3665.28		0.699667	0.108335	127280	25047.5	0.861677	0.602887
JW3467	ECK3485	b3500	gor	4	31	2	E	4	J		0.525	41477.3	1590158700	0.342	24437	71453.2		0.681	48841	1998823500	0.412	36058	87519.4		0.606	48640.2	1279439100	0.408	26860	65833.3		46319.5	2421.8	1622807100	2.08309e+08	0.387333	0.0226961	29118.3	3539.63		0.604	0.0450444	74935.3	6497.83	1	0.604
JW1329	ECK1331	b1335	ogt	4	31	3	E	6	J		0.443	43658.7	1672096500	0.342	24388	71309.9		0.605	50653.8	2193078600	0.402	34234	85159.2		0.741	58902.8	1678437900	0.484	28228	58322.3		51071.8	4405.56	1847871000	1.72614e+08	0.409333	0.0411555	28950	2865.13		0.596333	0.0861343	71597.2	7748.47	1	0.596333
JW1533	ECK1533	b1540	ydfH	4	29	4	E	7	J		0.29	34688.5	2627809200	0.282	38208	135489		0.383	38254.4	3060013500	0.316	52893	167383		0.463	43593.9	2098103400	0.37	41134	111173		38845.6	2587.71	2595308700	2.78155e+08	0.322667	0.0256212	44078.3	4487.54		0.378667	0.0499878	138015	16275.5	1	0.378667
JW2820	ECK2850	b2852	ygeH	4	31	4	E	8	J		0.388	31820.4	4412962800	0.273	70488	258198		0.467	36462.1	3392757900	0.311	52691	169424		0.612	43009.8	2350679400	0.395	40323	102084		37097.4	3245.69	3385466700	5.95341e+08	0.326333	0.0360432	54500.7	8754.77		0.489	0.0655922	176569	45207.6	1	0.489
JW1639	ECK1643	b1647	ydhF	4	29	5	E	9	J		0.391	46464.6	2284206300	0.372	35748	96096.8		0.553	42920.2	2862742500	0.355	45936	129397		0.594	47693.3	2052751500	0.409	38983	95313		45692.7	1430.92	2399900100	2.40874e+08	0.378667	0.0159409	40222.3	3005.59		0.512667	0.061974	106936	11233.1	1	0.512667
JW1732	ECK1741	b1743	spy	4	29	6	E	11	J		0.447	41313.9	2180609100	0.347	33780	97348.7		0.641	44387.9	2723937300	0.378	45398	120101		0.865	57583.3	1797022800	0.503	36230	72027.8		47761.7	4990.35	2233856400	2.68898e+08	0.409333	0.0476807	38469.3	3535.79		0.651	0.12077	96492.4	13884	1	0.651
JW0548	ECK0551	b0559	ybcW	4	31	6	E	12	J		0.427	42562.6	1435797000	0.34	23059	67820.6		0.768	55252.4	1661522400	0.45	29235	64966.7		0.907	59709.6	1238961600	0.51	25176	49364.7		52508.2	5136.56	1445427000	1.22078e+08	0.433333	0.0497773	25823.3	1812		0.700667	0.142595	60717.3	5735.78	1	0.700667
JW1779	ECK1788	b1790	yeaM	4	29	7	E	13	J		0.413	39592.4	1906897500	0.319	29708	93128.5		0.601	44973.7	2582041500	0.371	43193	116423		0.782	54716.9	1774515600	0.473	34482	72900.6		46427.7	4426.18	2087818200	2.50049e+08	0.387667	0.0452303	35794.3	3947.7		0.598667	0.106528	94150.8	12574.3	1	0.598667
JW1021	ECK1024	b1038	csgF	4	29	9	E	17	J		0.508	41941.3	2544073200	0.33	43420	131576		0.651	47899.3	2776555800	0.369	53755	145678		0.856	54260.6	1706654700	0.452	40913	90515.5		48033.7	3556.91	2342427900	3.24894e+08	0.383667	0.0359738	46029.3	3930.04		0.671667	0.100989	122590	16545.7	1	0.671667
JW1185	ECK1184	b1196	ycgY	4	31	9	E	18	J		0.474	36942.4	2861712000	0.315	48209	153044		0.525	39484.3	3470681700	0.334	65417	195859		0.683	44622.2	2313927900	0.398	54147	136048		40349.6	2258.79	2882107200	3.34082e+08	0.349	0.0251064	55924.3	5046.38		0.560667	0.0629135	161650	17794.2	1	0.560667
JW2618	ECK2633	b2637	yfjT	4	29	10	E	19	J		0.473	40708.3	2636079300	0.329	46873	142471		0.742	50434.3	2163888900	0.432	40847	94553.2		0.918	53785.5	1803272400	0.475	43242	91035.8		48309.4	3921.72	2201080200	2.41129e+08	0.412	0.0433167	43654	1751.71		0.711	0.129392	109353	16590	1	0.711
JW0141	ECK0144	b0145	dksA	4	29	11	E	21	J		0.439	38374.2	2560613400	0.33	41584	126012		0.473	39777.6	3676745700	0.334	65052	194766		0.822	46842.8	1857806100	0.421	44990	106865		41664.8	2620.46	2698388400	5.29582e+08	0.361667	0.0296891	50542	7321.32		0.578	0.122394	142548	26688	1	0.578
JW1557	ECK1559	b1565	ydfV	4	31	11	E	22	J		0.482	45777.2	4625325900	0.373	89382	239630		0.599	52414.4	3956011200	0.411	85910	209027		0.72	53750.9	2623670100	0.461	68403	148380		50647.5	2465.5	3735002400	5.883e+08	0.415	0.025482	81231.7	6492.17		0.600333	0.0687079	199012	26813.4	0.946387	0.568148
JW1279	ECK1281	b1286	rnb	4	29	12	E	23	J		0.713	49841.5	2482667100	0.431	44328	102849		0.903	55912.8	2998559700	0.478	61888	129473		0.866	54406.8	2224711800	0.484	54758	113136		53387	1825.3	2568646200	2.2749e+08	0.464333	0.0167564	53658	5098.89		0.827333	0.0581559	115153	7751.42	0.861677	0.712894
JW1815	ECK1824	b1826	yobG	4	31	12	E	24	J		1.156	65183	1687230900	0.554	38600	69675.1		1.457	74966.6	1712143800	0.648	42838	66108		0.904	63188.6	1637681400	0.541	41112	75992.6		67779.4	3639.41	1679018700	2.18841e+07	0.581	0.0337095	40850	1230.4		1.17233	0.159846	70591.9	2890.02	0.740584	0.868211
JW1860	ECK1872	b1871	yecP	4	25	1	F	1	K		0.609	38629.7	2907144900	0.358	50320	140559		1.052	51709.4	2979612900	0.513	72651	141620		0.811	47880.1	2590854300	0.451	68634	152182		46073.1	3882.38	2825870700	1.19356e+08	0.440667	0.045042	63868.3	6872.7		0.824	0.128048	144787	3710.18	0.740584	0.610241
JW2087	ECK2093	b2100	yegV	4	27	1	F	2	K		0.378	36835.1	5921807400	0.292	93880	321507		0.477	45049.1	6036369300	0.368	103662	281690		0.65	50718.3	3556926900	0.439	68923	157000		44200.8	4030.12	5171701200	8.08064e+08	0.366333	0.0424434	88821.7	10342.3		0.501667	0.0794824	253399	49551	0.861677	0.432275
JW2659	ECK2678	b2684	mprA	4	25	2	F	3	K		0.519	42797.1	2029243500	0.335	34088	101755		0.705	48385.8	1897784100	0.385	34666	90041.6		0.758	52726.1	1349708400	0.427	29647	69430.9		47969.7	2873.82	1758912000	2.08091e+08	0.382333	0.0265916	32800.3	1585.47		0.660667	0.0724669	87075.9	9448.31	0.946387	0.625246
JW2166	ECK2172	b2178	yejB	4	27	2	F	4	K		0.507	40540.1	2918212200	0.337	49739	147593		0.61	42416.3	2958553800	0.358	50936	142279		0.614	46664.5	2204803800	0.404	45720	113168		43206.9	1811.62	2693856600	2.44804e+08	0.366333	0.019785	48798.3	1577.48		0.577	0.035019	134347	10699.9	1	0.577
JW0543	ECK0545	b0554	essD	4	25	3	F	5	K		0.521	43119.2	2327720400	0.357	35034	98134.5		0.649	47398.9	2788219800	0.393	42736	108743		0.712	51057.9	1899033300	0.446	37240	83497.8		47192	2294.05	2338324500	2.56741e+08	0.398667	0.0258478	38336.7	2289.99		0.627333	0.0561911	96791.7	7318.53	1	0.627333
JW2430	ECK2432	b2437	yfeG	4	27	3	F	6	K		0.474	38358.6	2465938800	0.316	35436	112139		0.616	45433.2	2439405000	0.379	40380	106544		0.656	45891.2	1756500300	0.4	35311	88277.5		43227.7	2438.1	2220614700	2.32184e+08	0.365	0.0252389	37042.3	1669.22		0.582	0.0552208	102320	7204.72	1	0.582
JW0006	ECK0007	b0007	yaaJ	4	25	4	F	7	K		0.401	34589	4235443200	0.288	70243	243899		0.555	38068.2	4114089000	0.312	74805	239760		0.457	39609.4	2301038100	0.349	46190	132350		37422.2	1484.82	3550190100	6.25558e+08	0.316333	0.017742	63746	8876.24		0.471	0.0450037	205336	36512.9	1	0.471
JW2586	ECK2602	b2605	yfiB	4	27	4	F	8	K		0.455	45172.2	3732290100	0.357	62606	175367		0.595	52640.8	3787189200	0.424	60735	143243		0.68	63188	2659798800	0.503	48814	97045.7		53667	5225.97	3393092700	3.66989e+08	0.428	0.042194	57385	4319.4		0.576667	0.0655956	138552	22730.7	1	0.576667
JW0255	ECK0265	b0263	afuB	4	25	5	F	9	K		0.295	32628.9	2633693400	0.25	40732	162928		0.419	39613.2	2758196700	0.307	46665	152003		0.482	45373.4	2124273600	0.37	42303	114332		39205.2	3684.68	2505387900	1.93917e+08	0.309	0.0346554	43233.3	1774.75		0.398667	0.0549313	143088	14719.5	1	0.398667
JW2737	ECK2762	b2767	ygcO	4	27	5	F	10	K		0.4	33233.1	2604636000	0.283	41065	145106		0.438	37710.2	2775584700	0.318	49237	154833		0.483	36929.5	1951801200	0.33	40832	123733		35957.6	1380.75	2444007300	2.51002e+08	0.310333	0.0140989	43711.3	2763.65		0.440333	0.0239884	141224	9185.2	1	0.440333
JW0376	ECK0380	b0385	yaiC	4	25	6	F	11	K		0.377	37808.6	1921579200	0.299	28940	96789.3		0.556	43476.1	2101070700	0.349	35480	101662		0.638	46614.9	1435835700	0.394	28676	72781.7		42633.2	2576.84	1819495200	1.98704e+08	0.347333	0.0274368	31032	2225.31		0.523667	0.0770591	90411	8926.15	1	0.523667
JW0184	ECK0188	b0189	rof	4	27	6	F	12	K		0.487	44553.5	1746801000	0.36	25825	71736.1		0.606	48429.2	1936668600	0.402	31407	78126.9		0.688	53806.2	1384115400	0.449	26961	60046.8		48929.6	2682.73	1689195000	1.62088e+08	0.403667	0.0257056	28064.3	1703.2		0.593667	0.0583505	69969.9	5293.46	1	0.593667
JW0460	ECK0465	b0471	ybaB	4	25	7	F	13	K		0.537	42460.2	1872241200	0.36	31315	86986.1		0.711	45600.2	2268126000	0.39	37181	95335.9		0.785	51058.2	1311120900	0.449	26864	59830.7		46372.9	2511.91	1817162700	2.77633e+08	0.399667	0.0261428	31786.7	2987.58		0.677667	0.0735059	80717.6	10718	1	0.677667
JW0697	ECK0696	b0707	ybgA	4	27	7	F	14	K		0.491	38522.2	2255161500	0.324	37685	116312		0.532	41591	3035088000	0.349	54905	157321		0.685	47600.7	1906182000	0.421	42249	100354		42571.3	2666.18	2398810500	3.33708e+08	0.364667	0.0290765	44946.3	5150.69		0.569333	0.059032	124662	16966.7	1	0.569333
JW0655	ECK0650	b0658	ybeX	4	25	8	F	15	K		0.454	39971.8	1985941800	0.325	31368	96516.9		0.618	43621.9	2606678100	0.377	44995	119350		0.668	50184.4	1682291700	0.429	36379	84799.5		44592.7	2987.81	2091637200	2.7203e+08	0.377	0.0300222	37580.7	3979.4		0.58	0.0646323	100222	10144.5	1	0.58
JW2318	ECK2315	b2321	flk	4	27	8	F	16	K		0.56	45312.2	2015342100	0.371	31833	85803.2		0.696	50592.2	2343410100	0.427	40088	93882.9		0.896	55914.1	1699182900	0.487	36812	75589.3		50606.2	3060.52	2019311700	1.85983e+08	0.428333	0.033493	36244.3	2399.86		0.717333	0.0975796	85091.8	5292.87	1	0.717333
JW2441	ECK2452	b2457	cchA	4	27	9	F	18	K		0.579	47422.6	2375249400	0.384	37881	98648.4		0.683	51883	2446135200	0.421	41844	99391.9		0.923	60227	1519983900	0.526	34313	65233.8		53177.5	3752.55	2113789500	2.97607e+08	0.443667	0.0425297	38012.7	2175.01		0.728333	0.101858	87758.1	11264.2	1	0.728333
JW0817	ECK0823	b0833	yliE	4	25	10	F	19	K		0.66	56028.3	2570378400	0.441	43423	98464.9		0.695	51110.4	2358738900	0.401	41239	102840		0.975	62140	1493603100	0.54	34703	64264.8		56426.2	3190.18	2140906800	3.29368e+08	0.460667	0.0413132	39788.3	2619.66		0.776667	0.09968	88523.4	12194.9	1	0.776667
JW0125	ECK0128	b0129	yadI	4	27	10	F	20	K		0.547	40885.8	2389934700	0.346	39057	112882		0.659	45606.1	2441271600	0.389	43517	111869		0.834	52853.6	1588051800	0.483	37677	78006.2		46448.5	3480.37	2139752700	2.76248e+08	0.406	0.0404516	40083.7	1762.28		0.68	0.0835125	100919	11460.1	1	0.68
JW0875	ECK0883	b0892	ycaJ	4	25	11	F	21	K		0.487	39153	2558255400	0.322	35930	111584		0.562	46012.1	2932975800	0.352	43671	124065		0.768	52587.8	1795867200	0.466	30631	65731.8		45917.6	3878.59	2429032800	3.34553e+08	0.38	0.0438634	36744	3786.26		0.605667	0.0840046	100460	17734.2	1	0.605667
JW0309	ECK0315	b0317	yahC	4	27	11	F	22	K		0.684	52935.5	2010696300	0.429	35157	81951		0.785	56437.4	2362635900	0.444	42667	96096.8		0.975	61498.3	1522050300	0.528	33911	64225.4		56957	2485.48	1965127500	2.43723e+08	0.467	0.0308058	37245	2734.76		0.814667	0.085304	80757.8	9219.83	1	0.814667
JW0964	ECK0972	b0981	yccC	4	25	12	F	23	K		0.727	50434.6	4981804200	0.422	116528	276133		0.857	55051.8	5736619800	0.455	129180	283912		0.756	55470.4	4920257700	0.462	130166	281745		53652.3	1613.39	5212893900	2.62465e+08	0.446333	0.0123333	125291	4390.9		0.78	0.0393997	280596	2317.93	0.861677	0.672108
JW0474	ECK0479	b0485	ybaS	4	27	12	F	24	K		1.081	58787	1948811400	0.549	43786	79755.9		1.804	77359.3	2112372000	0.706	55514	78631.7		1.248	65300	1962512100	0.593	50996	85996.6		67148.8	5440.47	2007898500	5.23863e+07	0.616	0.0467582	50098.7	3415.18		1.37767	0.21855	81461.4	2290.71	0.740584	1.02028
JW0835	ECK0842	b0851	nfsA	4	29	1	F	1	L		0.533	37555	2692076400	0.343	40809	118977		1.001	50762.9	2979879300	0.508	56523	111266		0.729	52265.3	2532808800	0.503	52881	105131		46861.1	4673.2	2734921500	1.30824e+08	0.451333	0.0541859	50071	4748.84		0.754333	0.135692	111791	4005.47	0.740584	0.558647
JW3331	ECK3356	b3368	cysG	4	31	1	F	2	L		0.426	36183.8	2953594800	0.319	44371	139094		0.628	41980.1	2032837200	0.384	39757	103534		0.707	49570.8	1466020800	0.48	32062	66795.8		42578.2	3876.06	2150817600	4.33458e+08	0.394333	0.046763	38730	3590.21		0.587	0.083668	103141	20871.6	0.861677	0.505804
JW0967	ECK0975	b0984	ymcA	4	29	2	F	3	L		0.492	38729.4	2603151000	0.334	40572	121473		0.554	41010.8	3365402400	0.359	57255	159485		0.699	45918.3	2016420300	0.424	38317	90370.3		41886.2	2120.89	2661657900	3.90515e+08	0.372333	0.0268225	45381.3	5972.42		0.581667	0.0613361	123776	19984.8	1	0.581667
JW1627	ECK1631	b1635	gst	4	31	2	F	4	L		0.562	45938.1	1853275500	0.376	28024	74531.9		0.794	55311.6	2079873000	0.465	34378	73931.2		1.101	66001.4	1280148300	0.593	26331	44403		55750.3	5795.94	1737765600	2.37975e+08	0.478	0.0629788	29577.7	2449.42		0.819	0.156097	64288.7	9944.35	1	0.819
JW1498	ECK1497	b1504	ydeS	4	29	3	F	5	L		0.643	56694.3	1762794900	0.453	26745	59039.7		0.993	73579.1	1350636300	0.662	29203	44113.3		0.976	66674.2	1341623700	0.566	27153	47973.5		65649.2	4901.07	1485018300	1.38913e+08	0.560333	0.0603996	27700.3	760.509		0.870667	0.113939	50375.5	4473.14	1	0.870667
JW0217	ECK0228	b0227	yafL	4	31	3	F	6	L		0.465	39760.1	2179183500	0.332	32386	97548.2		0.568	42258.2	2388555000	0.359	36688	102195		0.586	45986.4	1737146700	0.404	33876	83851.5		42668.2	1809.03	2101628400	1.92002e+08	0.365	0.021	34316.7	1261.27		0.539667	0.0376932	94531.6	5505.94	1	0.539667
JW1535	ECK1535	b1542	ydfI	4	29	4	F	7	L		0.469	41547.5	2148948900	0.336	34409	102408		0.606	47213.4	2352849300	0.388	40948	105536		0.612	48611.5	1822140000	0.416	39805	95685.1		45790.8	2159.69	2107979400	1.54566e+08	0.38	0.0234379	38387.3	2016.35		0.562333	0.0466988	101210	2906.15	1	0.562333
JW0302	ECK0308	b0310	ykgH	4	31	5	F	10	L		0.401	36042.2	2499020100	0.289	40451	139969		0.582	46946.6	2565973800	0.382	46454	121607		0.614	50995.4	1735506900	0.437	37991	86935.9		44661.4	4465.29	2266833600	2.66366e+08	0.369333	0.0431908	41632	2513.41		0.532333	0.0663132	116171	15548.7	1	0.532333
JW1739	ECK1748	b1750	ydjX	4	29	6	F	11	L		0.422	36243.8	1664363700	0.299	25136	84066.9		0.51	41843.1	1830506400	0.346	30922	89369.9		0.626	46464	1302173100	0.399	25817	64704.3		41517	2954.83	1599014400	1.55977e+08	0.348	0.0288848	27291.7	1825.78		0.519333	0.0590743	79380.4	7496.03	1	0.519333
JW0551	ECK0554	b0562	ybcY	4	31	6	F	12	L		0.445	37221.8	2048722200	0.314	31468	100217		0.554	42455.7	2454039900	0.354	43191	122008		0.576	43746.8	1741611600	0.385	35949	93374		41141.4	1994.97	2081457900	2.06311e+08	0.351	0.0205508	36869.3	3415.28		0.525	0.040501	105200	8633.4	1	0.525
JW1836	ECK1848	b1847	yebF	4	29	7	F	13	L		0.395	38708.2	1877139000	0.308	27746	90084.4		0.529	40855.9	2139201900	0.327	34063	104168		0.657	49848.5	1649760300	0.416	32590	78341.3		43137.5	3412.27	1888700400	1.41408e+08	0.350333	0.0332883	31466.3	1908.15		0.527	0.0756395	90864.7	7465.77	1	0.527
JW0521	ECK0525	b0532	sfmD	4	29	8	F	15	L		0.564	41902.1	2207752200	0.346	34587	99962.4		0.636	44460.4	2349135900	0.377	40008	106122		0.744	49520.5	1730085300	0.436	36456	83614.7		45294.4	2238.42	2095657800	1.87287e+08	0.386333	0.0263965	37017	1589.85		0.648	0.0523068	96566.4	6715.53	1	0.648
JW1130	ECK1130	b1144	ymfJ	4	31	8	F	16	L		0.356	37700.2	5031658800	0.283	81711	288731		0.424	39926.2	5081811300	0.299	87709	293341		0.537	47694	3303914400	0.375	72959	194557		41773.4	3029.2	4472461500	5.84453e+08	0.319	0.0283784	80793	4282.63		0.439	0.0527857	258877	32187.2	1	0.439
JW1374	ECK1376	b1379	hslJ	4	29	9	F	17	L		0.488	43603.1	2043940500	0.35	31026	88645.7		0.698	53021.1	2139537600	0.446	36605	82074		0.895	54288.6	1610361900	0.484	35591	73535.1		50304.3	3370.5	1931280000	1.62815e+08	0.426667	0.039872	34407.3	1715.82		0.693667	0.117511	81418.3	4374.36	1	0.693667
JW2876	ECK2903	b2908	pepP	4	29	10	F	19	L		0.459	37435.2	2896953300	0.314	44240	140892		0.725	49951.6	2449908900	0.435	42794	98377		0.834	52022.7	1815902100	0.477	40664	85249.5		46469.8	4556.7	2387588100	3.13624e+08	0.408667	0.0488615	42566	1038.58		0.672667	0.111371	108173	16792.7	1	0.672667
JW2511	ECK2524	b2527	hscB	4	29	11	F	21	L		0.604	47011	2391199200	0.39	40259	103228		0.692	50396.3	3032315100	0.413	56062	135743		1.129	57813.3	1605899700	0.52	41306	79434.6		51740.2	3189.94	2343138000	4.12471e+08	0.441	0.0400541	45875.7	5102.13		0.808333	0.162333	106135	16319.8	1	0.808333
JW1635	ECK1639	b1643	ydhI	4	31	11	F	22	L		0.809	57134	1864857600	0.475	34609	72861.1		0.848	60367.3	2459694600	0.483	44322	91764		1.042	65056.6	1419872400	0.558	31832	57046.6		60852.6	2299.9	1914808200	3.01208e+08	0.505333	0.0264344	36921	3786.34		0.899667	0.0720517	73890.5	10035.3	0.946387	0.851433
JW0786	ECK0790	b0801	ybiC	4	29	12	F	23	L		0.899	56008.9	1964893500	0.464	40223	86687.5		0.89	58795.1	2035280700	0.47	40820	86851.1		0.873	59381.5	1458312300	0.509	34361	67506.9		58061.8	1040.33	1819495500	1.81731e+08	0.481	0.0141067	38468	2060.72		0.887333	0.00762306	80348.5	6420.98	0.861677	0.764595
JW1896	ECK1907	b1908	yecA	4	25	1	G	1	M		0.637	40696.9	2155213800	0.348	32049	92094.8		1.267	66092.3	1278737100	0.595	26720	44907.6		0.843	54151.5	1418972400	0.495	34008	68703		53646.9	7335.36	1617641100	2.71818e+08	0.479333	0.0717318	30925.7	2177.55		0.915667	0.185459	68568.5	13622	0.740584	0.678128
JW2093	ECK2099	b2106	yohM	4	27	1	G	2	M		0.533	44793.9	2531146500	0.373	36211	97080.4		1.135	68243.8	1833558300	0.591	32635	55220		1.297	64086.1	1187966700	0.62	26251	42340.3		59041.3	7224.08	1850890500	3.87839e+08	0.528	0.0779508	31699	2913.04		0.988333	0.23242	64880.2	16523.8	0.861677	0.851624
JW2704	ECK2729	b2734	pphB	4	25	2	G	3	M		0.505	43071.8	2412994500	0.353	33040	93597.7		0.736	53046.4	2464932600	0.426	36464	85596.2		0.826	55856.1	1620879300	0.49	26696	54481.6		50658.1	3878.91	2166268800	2.73107e+08	0.423	0.0395769	32066.7	2861.47		0.689	0.0955981	77891.9	11930.8	0.946387	0.652061
JW2167	ECK2173	b2179	yejE	4	27	2	G	4	M		0.549	46427.5	2190321900	0.379	34894	92068.6		0.721	49699	2329008300	0.424	42627	100535		0.7	50709.9	1725490800	0.45	38168	84817.8		48945.5	1292.36	2081607000	1.82503e+08	0.417667	0.0207391	38563	2241.04		0.656667	0.0541736	92473.9	4541.8	1	0.656667
JW2438	ECK2449	b2454	eutJ	4	27	3	G	6	M		0.432	36984.5	2730713400	0.303	42353	139779		0.568	42164.5	2870205300	0.348	50053	143830		0.495	40773.4	2080382400	0.349	45369	129997		39974.1	1547.81	2560433700	2.4338e+08	0.333333	0.0151694	45925	2240.12		0.498333	0.0392952	137869	4105.95	1	0.498333
JW0066	ECK0068	b0067	thiP	4	25	4	G	7	M		0.497	41608.6	2662122600	0.346	40738	117740		0.564	43979.6	2769555600	0.369	45962	124558		0.614	45637.7	1971336600	0.396	41692	105283		43742	1169.16	2467671600	2.50098e+08	0.370333	0.0144491	42797.3	1606.12		0.558333	0.0338936	115860	5643.14	1	0.558333
JW2615	ECK2630	b2634	yfjR	4	27	4	G	8	M		0.455	40828.4	2688112800	0.317	41066	129546		0.546	44933.6	2391477300	0.357	41953	117515		0.543	46718.6	1806324300	0.399	39049	97867.2		44160.2	1743.78	2295304800	2.59053e+08	0.357667	0.0236737	40689.3	859.207		0.514667	0.0298459	114976	9232.53	1	0.514667
JW0300	ECK0306	b0307	ykgF	4	25	5	G	9	M		0.424	37067.3	2391203700	0.293	34101	116386		0.492	39794.7	2316189600	0.324	36711	113306		0.532	43792.9	1834927200	0.367	34407	93752		40218.3	1953.04	2180773500	1.74274e+08	0.328	0.0214554	35073	823.75		0.482667	0.0315242	107814	7087.19	1	0.482667
JW0397	ECK0401	b0407	yajC	4	25	6	G	11	M		0.468	38544.5	1666621800	0.326	26440	81104.3		0.593	40557.2	2339731800	0.346	41493	119922		0.611	45195.3	1805754600	0.395	36689	92883.5		41432.3	1969.16	1937369400	2.05151e+08	0.355667	0.0204966	34874	4439.18		0.557333	0.0449679	97969.9	11490.7	1	0.557333
JW0210	ECK0221	b0220	ivy	4	27	6	G	12	M		0.524	42471.9	2362407300	0.342	35631	104184		0.575	44588.5	2571704100	0.368	43180	117337		0.596	48100.6	1917114300	0.413	38449	93096.9		45053.7	1641.42	2283741900	1.93014e+08	0.374333	0.0207391	39086.7	2202.41		0.565	0.0213776	104873	7005.98	1	0.565
JW0467	ECK0472	b0478	ybaL	4	25	7	G	13	M		0.493	44609.4	2238899400	0.358	35772	99921.8		0.729	59259.5	2168188200	0.492	38877	79018.3		0.727	53911.2	1745653500	0.458	35766	78091.7		52593.4	4280.14	2050913700	1.53989e+08	0.436	0.0402161	36805	1036		0.649667	0.0783355	85677.3	7127.28	1	0.649667
JW1395	ECK1397	b1400	paaY	4	27	7	G	14	M		0.556	42263.5	2292666300	0.356	36410	102275		0.627	55281.2	3250881000	0.454	59717	131535		0.659	54467.2	2328619500	0.472	49280	104407		50670.6	4210.13	2624055600	3.13585e+08	0.427333	0.0360432	48469	6740.36		0.614	0.0304357	112739	9418.19	1	0.614
JW0659	ECK0654	b0662	ubiF	4	25	8	G	15	M		0.378	38749.9	3142876500	0.327	46377	141826		0.472	43675.7	4126473000	0.367	68398	186371		0.612	50086.7	3467951100	0.441	70174	159125		44170.7	3282.02	3579100200	2.89327e+08	0.378333	0.0333933	61649.7	7653.52		0.487333	0.0679837	162440	12965.4	1	0.487333
JW2381	ECK2380	b2384	ypdE	4	27	8	G	16	M		0.476	40228.1	2403085500	0.322	36058	111981		0.597	45745.5	2550427200	0.374	41664	111401		0.766	52909.1	1825800300	0.466	39151	84015		46294.2	3670.96	2259771000	2.21115e+08	0.387333	0.0421004	38957.7	1621.2		0.613	0.0840972	102466	9226.92	1	0.613
JW2515	ECK2528	b2531	iscR	4	27	9	G	18	M		0.453	46416.2	3632978700	0.348	44309	127325		0.717	60894.3	3995307900	0.484	57794	119409		1.093	69909.4	2480078700	0.566	53178	93954.1		59073.3	6842.73	3369455100	4.56824e+08	0.466	0.0635715	51760.3	3956.79		0.754333	0.185693	113563	10067	1	0.754333
JW0818	ECK0824	b0834	yliF	4	25	10	G	19	M		0.445	41047.7	2798313300	0.315	42809	135902		0.526	43860	2843520300	0.349	48061	137711		0.674	46052.3	1763834400	0.402	41485	103197		43653.3	1448.38	2468556000	3.52602e+08	0.355333	0.0253136	44118.3	2008.04		0.548333	0.0670431	125603	11215.4	1	0.548333
JW0131	ECK0134	b0135	yadC	4	27	10	G	20	M		0.385	34862.5	3114785700	0.298	47390	159027		0.317	32702.5	3517445700	0.267	58336	218487		0.621	42760.5	1960795800	0.378	45224	119640		36775.2	3056.95	2864342400	4.66487e+08	0.314333	0.0330673	50316.7	4058.13		0.441	0.0921159	165718	28730	1	0.441
JW0880	ECK0888	b0897	ycaC	4	25	11	G	21	M		0.505	38506.6	3023768700	0.345	53064	153809		0.484	39040.4	2884953600	0.334	54504	163186		0.643	41814	1715763600	0.384	40911	106539		39787	1025.15	2541495300	4.14806e+08	0.354333	0.0151694	49493	4311.09		0.544	0.0498698	141178	17529.6	1	0.544
JW0317	ECK0323	b0325	yahK	4	27	11	G	22	M		0.653	47320.5	2271053700	0.401	43680	108928		0.766	49786.4	2277471600	0.424	45679	107733		0.82	51684.2	1482741000	0.464	36955	79644.4		49597	1263.26	2010422100	2.63847e+08	0.429667	0.0184059	42104.7	2638.71		0.746333	0.0492014	98768.5	9568.28	0.946387	0.70632
JW0862	ECK0869	b0878	macA	4	29	1	G	1	N		0.505	37810	2708802000	0.317	43628	137628		0.016	13801.2	137106900	0.084	2381	28345.2		0.944	48983.3	1779942600	0.467	42880	91820.1		33531.5	10379	1541950500	7.51861e+08	0.289333	0.111425	29629.7	13626		0.488333	0.26802	85931	31684.3	0.740584	0.361652
JW1794	ECK1803	b1805	fadD	4	31	1	G	2	N		0.538	39720.5	2548781100	0.345	39870	115565		1.07	52847.2	2433874500	0.586	50829	86738.9		1.048	49553	1393706700	0.496	39484	79604.8		47373.6	3942.92	2125454100	3.67374e+08	0.475667	0.0703096	43394.3	3719		0.885333	0.173783	93969.7	10992.4	0.861677	0.762871
JW0969	ECK0977	b0986	ymcC	4	29	2	G	3	N		0.552	39153.8	2156968800	0.336	32803	97628		1.257	65313.1	2203641900	0.575	45171	78558.3		1.051	58739.8	1471287600	0.542	35185	64917		54402.2	7856.8	1943966100	2.36723e+08	0.484333	0.074776	37719.7	3788.59		0.953333	0.209293	80367.7	9486.1	0.946387	0.902222
JW3914	ECK3934	b3942	katG	4	31	2	G	4	N		0.519	41793.2	1895730300	0.341	28903	84759.5		0.681	47059.1	2487002400	0.436	38166	87536.7		0.864	58559.5	1250961300	0.519	27313	52626.2		49137.3	4950.29	1877898000	3.56926e+08	0.432	0.0514231	31460.7	3383.94		0.688	0.0996544	74974.1	11202.7	0.946387	0.651114
JW1505	ECK1505	b1512	ydeW	4	29	3	G	5	N		0.535	40518	2313961200	0.343	38724	112898		0.713	46701.7	2608355700	0.399	47806	119815		0.696	48823.9	1782816300	0.423	40070	94728.1		45347.9	2491.43	2235044400	2.41557e+08	0.388333	0.0237019	42200	2829.8		0.648	0.0567127	109147	7480.75	0.946387	0.613259
JW2728	ECK2753	b2758	ygcJ	4	31	3	G	6	N		0.474	45285.1	1691315100	0.366	24951	68172.1		0.821	59005.1	1972148400	0.501	33352	66570.9		0.995	65083.4	1306894500	0.582	26416	45388.3		56457.9	5855.46	1656786000	1.92817e+08	0.483	0.063	28239.7	2590.91		0.763333	0.153139	60043.8	7342.29	0.946387	0.722409
JW1546	ECK1548	b1554	ydfQ	4	29	4	G	7	N		0.557	43621.2	1987887600	0.375	31493	83981.3		0.766	51360.8	2658187800	0.455	47672	104774		0.986	57098.7	1649323800	0.526	36288	68988.6		50693.6	3904.9	2098466400	2.96436e+08	0.452	0.0436157	38484.3	4797.84		0.769667	0.123855	85914.5	10375.4	0.946387	0.728403
JW0207	ECK0218	b0218	yafU	4	31	4	G	8	N		0.459	41103.8	2238244200	0.337	34117	101237		0.614	43977.6	2367753300	0.377	40271	106820		0.639	48691.6	1554993900	0.428	33312	77831.8		44591	2211.78	2053663800	2.52122e+08	0.380667	0.0263333	35900	2197.82		0.570667	0.0562978	95296.3	8879.69	0.946387	0.540072
JW1649	ECK1653	b1657	ydhP	4	29	5	G	9	N		0.401	33474.2	2291002200	0.267	32235	120730		0.483	37033.5	2592298800	0.309	40934	132472		0.551	43449	1610009100	0.379	31654	83519.8		37985.6	2918.56	2164436700	2.90538e+08	0.318333	0.0326667	34941	3001.19		0.478333	0.0433641	112241	14755.2	0.946387	0.452688
JW1741	ECK1750	b1752	ydjZ	4	29	6	G	11	N		0.484	32658.7	1745566200	0.315	22134	70266.7		0.474	31569.7	2626976700	0.298	37714	126557		0.646	37255.9	1751988600	0.373	27461	73622		33828.1	1742.52	2041510500	2.92739e+08	0.328667	0.0227034	29103	4571.88		0.534667	0.0557415	90148.6	18230	0.946387	0.506002
JW0552	ECK0555	b0563	ylcE	4	31	6	G	12	N		0.603	47606.9	1700541000	0.366	25568	69857.9		0.694	48909.1	1806810300	0.406	29386	72379.3		0.808	58655.8	1330725600	0.5	24856	49712		51723.9	3486.25	1612692300	1.44282e+08	0.424	0.0397157	26603.3	1406.43		0.701667	0.0593024	63983.1	7172.57	0.946387	0.664048
JW1949	ECK1962	b1966	yedS	4	29	7	G	13	N		0.417	46053.2	1514228400	0.368	22936	62326.1		0.778	58854.2	1905261300	0.486	33319	68557.6		0.885	64306.3	1562125500	0.545	29007	53223.9		56404.6	5409.71	1660538400	1.2314e+08	0.466333	0.0520331	28420.7	3011.62		0.693333	0.141577	61369.2	4452.26	0.946387	0.656162
JW0832	ECK0839	b0848	ybjM	4	31	7	G	14	N		0.701	59099.7	2186339400	0.47	37089	78912.8		0.823	67147.4	2335729500	0.545	42297	77609.2		1.027	70394.9	1649178900	0.585	35498	60680.3		65547.3	3357.38	2057082600	2.08461e+08	0.533333	0.0337062	38294.7	2053.19		0.850333	0.0950953	72400.8	5872.28	0.946387	0.804744
JW0557	ECK0560	b0568	nfrA	4	29	8	G	15	N		0.562	55412.5	2972464200	0.464	43940	94698.3		0.665	58725.7	3135987900	0.483	49512	102509		0.758	63179.4	2068960500	0.522	40972	78490.4		59105.8	2250.16	2725804200	3.31797e+08	0.489667	0.0170717	44808	2503.2		0.661667	0.0566049	91899.3	7073.48	0.946387	0.626193
JW1147	ECK1147	b1160	elbA	4	31	8	G	16	N		0.451	41745.6	2148488100	0.318	29889	93990.6		0.616	49787.6	2180520000	0.377	35325	93700.3		0.836	58142	1456314300	0.483	30102	62323		49891.7	4733.51	1928440800	2.36244e+08	0.392667	0.0482712	31772	1777.56		0.634333	0.111517	83337.9	10507.8	0.946387	0.600325
JW1677	ECK1684	b1687	ydiJ	4	29	9	G	17	N		0.383	42529	2298737700	0.34	33681	99061.8		0.472	44638.4	2586351600	0.349	42692	122327		0.68	45641.8	1613127600	0.386	37664	97575.1		44269.7	917.309	2166072300	2.8867e+08	0.358333	0.0140752	38012.3	2607.08		0.511667	0.0880006	106321	8014.23	0.946387	0.484235
JW0426	ECK0430	b0436	tig	4	29	11	G	21	N		0.503	38308.1	2557293300	0.33	49049	148633		0.607	43042.6	2893284000	0.373	60965	163445		0.74	43687.1	1835881200	0.4	45555	113888		41679.3	1695.8	2428819500	3.11932e+08	0.367667	0.0203825	51856.3	4664.69		0.616667	0.0685865	141989	14686.7	0.946387	0.583605
JW1713	ECK1722	b1724	ydiZ	4	31	11	G	22	N		0.627	50413.1	1765717200	0.403	30617	75972.7		0.823	59312.8	1624865400	0.497	29225	58802.8		0.943	63509.8	1147138200	0.552	23952	43391.3		57745.3	3861.08	1512573600	1.87187e+08	0.484	0.043501	27931.3	2029.84		0.797667	0.0920966	59388.9	9410	0.946387	0.754901
JW3547	ECK3564	b3575	yiaK	4	29	12	G	23	N		0.58	40177.1	2805806700	0.355	50330	141775		0.961	56861.4	2405019600	0.497	51370	103360		0.785	50199.3	1698315300	0.465	40787	87714		49079.2	4848.79	2303047200	3.23745e+08	0.439	0.0430039	47495.7	3367.74		0.775333	0.110091	110950	16060.7	0.861677	0.668087
JW1918	ECK1932	b1933	yedN	4	31	12	G	24	N		0.722	49163.2	2066223600	0.426	43864	102967		1.179	61783.4	1612936800	0.562	38444	68405.7		0.811	55439.8	1387792800	0.489	35056	71689.2		55462.1	3643.14	1688984400	1.99503e+08	0.492333	0.0392952	39121.3	2565.11		0.904	0.13988	81020.7	11014.1	0.740584	0.669488
JW1915	ECK1929	b1930	yedF	4	25	1	H	1	O		0.716	57538.9	1937769300	0.448	32772	73151.8		1.363	78143.6	1579339800	0.672	35804	53279.8		1.38	71317.5	1289662200	0.641	34683	54107.6		69000	6059.88	1602257100	1.87443e+08	0.587	0.0700738	34419.7	885.111		1.153	0.218555	60179.7	6490.43	0.740584	0.853893
JW2116	ECK2121	b2128	yehW	4	27	1	H	2	O		0.557	45193.9	1994030100	0.368	29783	80932.1		1.273	65495.2	1749894300	0.601	36121	60101.5		0.837	53592.5	1422901800	0.49	34902	71228.6		54760.5	5889.51	1722275400	1.65448e+08	0.486333	0.0672863	33602	1941.65		0.889	0.20832	70754	6017.95	0.861677	0.766031
JW2752	ECK2775	b2781	mazG	4	25	2	H	3	O		0.478	40804.2	2199989700	0.323	34691	107402		1.018	59410.1	1984059000	0.516	41062	79577.5		0.771	48172.2	1526645700	0.432	37145	85983.8		49462.2	5409.64	1903564800	1.98501e+08	0.423667	0.0558699	37632.7	1855.24		0.755667	0.156073	90987.9	8413.05	0.861677	0.651141
JW2168	ECK2174	b2180	yejF	4	27	2	H	4	O		0.577	47695.5	1878544800	0.382	28318	74130.9		0.964	59392.9	1738603800	0.501	31379	62632.7		0.802	56864.4	1458322200	0.488	30426	62348.4		54650.9	3553.49	1691823600	1.23542e+08	0.457	0.0376873	30041	904.36		0.781	0.11221	66370.7	3880.98	0.861677	0.67297
JW1361	ECK1365	b1368	ynaA	4	25	3	H	5	O		0.517	36308.4	1546887600	0.316	25593	80990.5		0.725	41741.6	1711505700	0.377	33325	88395.2		0.813	42300.2	1057680000	0.394	24777	62885.8		40116.7	1910.96	1438691100	1.96343e+08	0.362333	0.0236807	27898.3	2723.54		0.685	0.0877572	77423.8	7576.8	0.861677	0.590249
JW0068	ECK0070	b0069	sgrR	4	25	4	H	7	O		0.494	40847.6	2154097800	0.343	32294	94151.6		0.76	48851.1	2299257900	0.42	40634	96747.6		0.909	54741.3	1497968100	0.502	33799	67328.7		48146.7	4026.22	1983774600	2.46491e+08	0.421667	0.0459069	35575.7	2566.21		0.721	0.121377	86076	9403.55	0.861677	0.621269
JW2619	ECK2634	b2638	yfjU	4	27	4	H	8	O		0.523	47018.1	1830823200	0.386	27954	72419.7		0.946	66127.1	2140923600	0.548	39801	72629.6		1.066	66481.6	1510945200	0.575	32197	55994.8		59875.6	6429.57	1827564000	1.81866e+08	0.503	0.0590169	33317.3	3465.51		0.845	0.164685	67014.7	5510.28	0.861677	0.728117
JW0307	ECK0313	b0315	yahA	4	25	5	H	9	O		0.46	38047.3	2111416200	0.315	32221	102289		0.701	49652.6	1868968800	0.413	33065	80060.5		0.828	53531.5	1291009500	0.461	27858	60429.5		47077.1	4651.68	1757131500	2.43343e+08	0.396333	0.0429625	31048	1613.5		0.663	0.107918	80926.3	12091.5	0.861677	0.571292
JW0325	ECK0331	b0334	prpD	4	27	6	H	12	O		0.746	53434.8	1832710500	0.44	29841	67820.5		0.789	55836.3	2062935900	0.46	37842	82265.2		1.03	68444.1	1452337200	0.564	28727	50934.4		59238.4	4654.77	1782661200	1.78032e+08	0.488	0.0384361	32136.7	2870.74		0.855	0.0883761	67006.7	9053.58	0.861677	0.736734
JW0470	ECK0475	b0481	ybaK	4	25	7	H	13	O		0.565	50256.9	2012565600	0.409	32005	78251.8		0.78	54973.6	2874000600	0.477	55717	116807		0.898	57461.1	2223739800	0.512	43324	84617.2		54230.5	2112.61	2370102000	2.59219e+08	0.466	0.0302379	43682	6847.4		0.747667	0.0974788	93225.4	11933.2	0.861677	0.644247
JW1823	ECK1833	b1834	yebT	4	27	7	H	14	O		0.739	60103.5	1899157500	0.483	31343	64892.3		1.036	75076	1778007600	0.607	34748	57245.5		1.208	80759.3	1350747000	0.661	29195	44167.9		71979.6	6160.53	1675970700	1.6633e+08	0.583667	0.052692	31762	1616.64		0.994333	0.136982	55435.2	6050.7	0.861677	0.856794
JW0701	ECK0700	b0711	ybgJ	4	25	8	H	15	O		0.62	60620.7	1522491300	0.474	22135	46698.3		0.882	71724.3	1823859000	0.559	31044	55534.9		1.213	81618.8	1409423400	0.649	28233	43502.3		71321.2	6064.97	1585257900	1.23685e+08	0.560667	0.050525	27137.3	2629.51		0.905	0.17157	48578.5	3598.47	0.861677	0.779818
JW2383	ECK2382	b2386	ypdG	4	27	8	H	16	O		0.417	32894.3	3072920400	0.279	42496	152315		0.743	50769.3	3050855100	0.429	49716	115888		0.895	52645.9	2156844600	0.475	40566	85402.1		45436.5	6294.47	2760206700	3.01748e+08	0.394333	0.0591758	44259.3	2784.64		0.685	0.141001	117869	19341.6	0.861677	0.590249
JW0777	ECK0782	b0793	ybhS	4	25	9	H	17	O		0.397	37717.5	1985020200	0.308	29538	95902.6		0.706	48973.2	2390774400	0.414	42580	102850		1.064	58669.9	1472799600	0.524	33177	63314.9		48453.5	6054.03	1949531400	2.6559e+08	0.415333	0.0623574	35098.3	3885.53		0.722333	0.192719	87355.9	12186.7	0.861677	0.622418
JW2640	ECK2659	b2665	ygaU	4	27	9	H	18	O		0.733	49070.6	1837160100	0.427	26027	60953.2		0.84	59406.1	2094342300	0.477	32877	68924.5		1.025	62182.7	1655902800	0.529	32949	62285.4		56886.5	3989.29	1862468400	1.27198e+08	0.477667	0.0294468	30617.7	2295.43		0.866	0.0852897	64054.4	2465.26	0.861677	0.746212
JW0819	ECK0825	b0835	yliG	4	25	10	H	19	O		0.426	40691.1	2236235400	0.345	35785	103725		0.499	43611.6	2226588300	0.364	40304	110725		0.706	47257.9	1685636100	0.421	37964	90175.8		43853.5	1899.54	2049486600	1.81947e+08	0.376667	0.0228352	38017.7	1304.8		0.543667	0.0838577	101542	6031.69	0.861677	0.468465
JW0137	ECK0140	b0141	yadN	4	27	10	H	20	O		0.66	43454.3	2290293900	0.373	41307	110743		0.873	54027.9	2108961900	0.471	44057	93539.3		0.931	52896.7	1437476400	0.488	36590	74979.5		50126.3	3351.93	1945577400	2.59387e+08	0.444	0.0358376	40651.3	2180.32		0.821333	0.0823859	93087.1	10326.4	0.861677	0.707724
JW0881	ECK0889	b0898	ycaD	4	25	11	H	21	O		0.569	37790.3	2665494900	0.332	44889	135208		0.859	48833	2734842600	0.437	55316	126581		0.906	48111.5	1900935900	0.453	43158	95271.5		44911.6	3566.74	2433757800	2.67162e+08	0.407333	0.0379488	47787.7	3797.19		0.778	0.105377	119020	12132.7	0.861677	0.670385
JW0360	ECK0365	b0368	tauD	4	27	11	H	22	O		0.571	40326.1	2441587500	0.346	41342	119486		0.866	51804.8	2058986700	0.45	43294	96208.9		0.788	50948.5	1412017200	0.464	35974	77530.2		47693.1	3691.79	1970863800	3.0046e+08	0.42	0.0372201	40203.3	2188.46		0.741667	0.0882541	97741.5	12135.7	0.861677	0.639077
JW2032	ECK2041	b2047	wcaJ	4	25	12	H	23	O		0.479	33334	3034631700	0.295	51274	173810		0.746	41962.8	2588476500	0.376	56680	150745		0.759	46238.4	1686740400	0.416	41056	98692.3		40511.7	3795.17	2436616200	3.96442e+08	0.362333	0.0355918	49670	4581.01		0.661333	0.0912439	141082	22216.3	0.861677	0.569856
JW0534	ECK0537	b0546	ybcM	4	27	12	H	24	O		0.563	39917.8	3020022000	0.32	58552	182975		1.097	59417.6	2405629800	0.513	58299	113643		0.603	47993.6	2203035300	0.4	53233	133082		49109.7	5656.72	2542895700	2.45627e+08	0.411	0.0559851	56694.7	1732.37		0.754333	0.171722	143234	20647.9	0.740584	0.558647
JW0863	ECK0870	b0879	macB	4	29	1	H	1	P		0.775	54984.7	2080548900	0.443	41639	93993.2		1.247	70094.3	1683512100	0.613	41699	68024.5		1.397	72559.9	1323527400	0.646	37242	57650.2		65879.6	5493.77	1695862800	2.18621e+08	0.567333	0.0628923	40193.3	1475.77		1.13967	0.187404	73222.6	10808.5	0.740584	0.844019
JW0008	ECK0009	b0009	mog	4	31	1	H	2	P		0.599	43760.2	1942288200	0.367	34458	93891		1.156	63631.4	1744839000	0.576	41209	71543.4		1.043	61754.6	1326845700	0.565	37858	67005.3		56382.1	6334.13	1671324300	1.81426e+08	0.502667	0.0679076	37841.7	1948.86		0.932667	0.169992	77479.9	8309.47	0.740584	0.690718
JW1194	ECK1191	b1203	ychF	4	29	2	H	3	P		0.639	47550	2614821300	0.427	46903	109843		0.998	60706.7	2830088700	0.536	62222	116086		0.924	57137.5	1887640200	0.549	48905	89080.1		55131.4	3928.24	2444183400	2.85126e+08	0.504	0.0386825	52676.7	4807.53		0.853667	0.109438	105003	8162.85	0.740584	0.632212
JW3879	ECK3901	b3908	sodA	4	31	2	H	4	P		0.372	32396	5637399300	0.265	93398	352445		0.516	40590.5	7965506700	0.354	159363	450178		0.523	43103.2	5342465700	0.379	116819	308230		38696.6	3232.72	6315123900	8.29572e+08	0.332667	0.0345945	123193	19307.3		0.470333	0.0492082	370284	41936.5	0.740584	0.348321
JW1507	ECK1507	b1514	lsrC	4	29	3	H	5	P		0.533	42487.9	2000589300	0.365	32407	88786.3		1.026	61028.2	2064621600	0.534	42516	79618		1.011	60646.9	1407681900	0.544	33091	60829		54721	6117.53	1824297600	2.09126e+08	0.481	0.0580718	36004.7	3261.65		0.856667	0.161891	76411.1	8228.31	0.740584	0.634434
JW2766	ECK2790	b2795	ygdH	4	31	3	H	6	P		0.564	37907.1	2029749300	0.33	31689	96027.3		0.799	51634.8	1862941500	0.463	35881	77496.8		0.879	55097.8	1330730100	0.496	30570	61633.1		48213.2	5249.14	1741140300	2.10779e+08	0.429667	0.0507357	32713.3	1616.44		0.747333	0.094531	78385.7	9938.7	0.740584	0.553463
JW1558	ECK1560	b1566	flxA	4	29	4	H	7	P		0.644	47972	1602422100	0.406	26450	65147.8		1.026	62746.8	1410459300	0.56	29205	52151.8		1.043	61769.4	1091452500	0.564	26374	46762.4		57496.1	4770.4	1368111300	1.49016e+08	0.51	0.0520128	27343	931.258		0.904333	0.130259	54687.3	5456.71	0.740584	0.669735
JW0222	ECK0233	b0232	yafN	4	31	4	H	8	P		0.537	43950.7	1928317500	0.369	31982	86672.1		0.956	58987.2	1951968600	0.523	41211	78797.3		1.041	64832	1265057100	0.588	29443	50073.1		55923.3	6219.54	1715114400	2.25132e+08	0.493333	0.0649367	34212	3575.43		0.844667	0.155778	71847.5	11122	0.740584	0.625547
JW1672	ECK1678	b1682	sufC	4	29	5	H	9	P		0.841	49811.2	1468329300	0.422	33122	78488.2		1.197	62506.5	1311933600	0.549	37195	67750.5		1.092	62207.7	787544100	0.552	22566	40880.4		58175.2	4182.86	1189269000	2.05874e+08	0.507667	0.0428421	30961	4359.07		1.04333	0.10561	62373	11184.4	0.740584	0.772676
JW0800	ECK0804	b0815	ybiP	4	29	8	H	15	P		1.662	65067.7	1285094700	0.641	40448	63101.4		1.245	65475.8	2153120400	0.589	51842	88017		1.059	63375	1690447500	0.562	39773	70770.5		64639.5	643.12	1709554200	2.50759e+08	0.597333	0.0231828	44021	3915.35		1.322	0.178278	73962.9	7367.51	0.740584	0.979052
JW1148	ECK1148	b1161	ycgX	4	31	8	H	16	P		0.742	50031.9	219141900	0.448	2975	6640.62		1.448	70976.5	203213700	0.617	3832	6210.7		1.441	69430.6	141962400	0.612	2902	4741.83		63479.7	6738.68	188106000	2.35255e+07	0.559	0.0555188	3236.33	298.578		1.21033	0.234175	5864.38	574.835	0.740584	0.896354
JW1956	ECK1969	b1973	yodA	4	29	9	H	17	P		0.391	33035.1	2879963100	0.265	47427	178970		0.801	52638.8	2392991100	0.442	53152	120253		0.741	50358.8	1658154600	0.429	38904	90685.3		45344.2	6189.66	2310369600	3.55117e+08	0.378667	0.0569571	46494.3	4139.4		0.644333	0.127845	129970	25944.4	0.740584	0.477183
JW3183	ECK3206	b3216	yhcD	4	29	10	H	19	P		0.675	43777.9	2331331200	0.395	44233	111982		1.073	59544.2	1937471400	0.526	44837	85241.4		0.98	54389.3	1312665300	0.491	33423	68071.3		52570.5	4641.31	1860489300	2.96572e+08	0.470667	0.0391592	40831	3708.1		0.909333	0.120203	88431.7	12776	0.740584	0.673438
JW1875	ECK1887	b1886	tar	4	29	11	H	21	P		0.525	39474.5	2545072200	0.323	43863	135799		1.051	61268.8	1932174000	0.542	42650	78690		1.099	59265	1274662800	0.541	31612	58432.5		53336.1	6954.88	1917303000	3.66811e+08	0.468667	0.0728339	39375	3897.26		0.891667	0.183856	90973.8	23162.8	0.740584	0.660354
JW1719	ECK1728	b1730	ydjO	4	31	11	H	22	P		0.469	39191.9	2494573200	0.306	48473	158408		0.771	56007.4	2410031700	0.455	59888	131622		0.816	57300.8	1812847500	0.463	49730	107408		50833.4	5832.7	2239150800	2.14544e+08	0.408	0.0510523	52697	3613.76		0.685333	0.108944	132480	14728.8	0.740584	0.507547
JW0505	ECK0510	b0517	allD	4	29	12	H	23	P		0.778	50556.6	2666453400	0.423	53495	126466		1.36	69859.4	2084458500	0.626	50071	79985.6		1.246	65904.2	1655507700	0.588	45379	77175.2		62106.8	5886.86	2135473200	2.92947e+08	0.545667	0.0623066	49648.3	2352.4		1.128	0.178067	94542.2	15982.4	0.740584	0.835379
JW5912	ECK1932	b1934	yedN	4	31	12	H	24	P		0.812	48598.7	3127911300	0.425	70916	166861		1.36	70000.1	2476751400	0.624	65525	105008		1.016	64415.1	2307249900	0.561	63175	112611		61004.6	6409.08	2637304200	2.50136e+08	0.536667	0.0587206	66538.7	2291.39		1.06267	0.159906	128160	19474.6	0.740584	0.786994
JW1920	ECK1933	b1935	yedM	5	33	1	A	1	A		0.784	48660.8	2919509100	0.431	63209	146657		0.9	57972.6	3110526900	0.508	77599	152754		0.818	54977.8	2793282300	0.475	71435	150389		53870.4	2744.54	2941106100	9.22151e+07	0.471333	0.0223035	70747.7	4168.23		0.834	0.0344287	149933	1774.86	0.740584	0.617647
JW3147	ECK3169	b3180	yhbY	5	35	1	A	2	A		0.716	47473.7	1993004100	0.414	42503	102664		1.009	59201.4	1918430100	0.516	48231	93470.9		0.837	54109.8	1727884800	0.47	40584	86348.9		53594.9	3395.27	1879773000	7.89363e+07	0.466667	0.029492	43772.7	2296.97		0.854	0.0850078	94161.4	4722.46	0.740584	0.632459
JW1306	ECK1308	b1313	ycjQ	5	33	2	A	3	A		0.802	50325.6	2197348200	0.436	46416	106459		0.832	51884.9	2516339700	0.462	60503	130959		0.72	52064.2	2089316700	0.459	47250	102941		51424.9	552.091	2267668200	1.28187e+08	0.452333	0.00821246	51389.7	4563.02		0.784667	0.033473	113453	8811.68	0.740584	0.581112
JW3170	ECK3192	b3203	yhbH	5	35	2	A	4	A		0.528	41411.5	4958649900	0.34	88724	260953		0.498	41369.1	5873520600	0.339	116354	343227		0.409	38815.8	5508967500	0.319	107363	336561		40532.2	858.252	5447046000	2.65909e+08	0.332667	0.00683943	104147	8136.57		0.478333	0.035732	313580	26384	0.740584	0.354246
JW2843	ECK2871	b2875	yqeB	5	33	3	A	5	A		0.764	47052.7	2542859100	0.417	53353	127945		0.699	43924.9	3092184000	0.378	69982	185138		0.572	45387.5	2541717900	0.401	56568	141067		45455.1	903.541	2725587000	1.83299e+08	0.398667	0.0113186	59967.7	5092.45		0.678333	0.0563807	151383	17297.1	0.740584	0.502363
JW3208	ECK3228	b3239	yhcO	5	35	3	A	6	A		0.732	48487.7	2032942500	0.412	42919	104172		0.657	47754.9	2502171000	0.399	56683	142063		0.667	51609.8	2060931600	0.438	46080	105205		49284.1	1181.91	2198681700	1.5196e+08	0.416333	0.0114649	48560.7	4162.42		0.685333	0.0235112	117147	12461.5	0.740584	0.507547
JW2882	ECK2911	b2915	yqfE	5	33	4	A	7	A		0.738	47370.7	2271809700	0.409	38331	93718.8		0.828	52132.2	2018755800	0.455	38335	84252.7		0.71	51201.2	2287270800	0.449	40455	90100.2		50234.7	1457.01	2192612100	8.70427e+07	0.437667	0.0144376	39040.3	707.334		0.758667	0.0355965	89357.3	2757.76	0.740584	0.561856
JW3235	ECK3254	b3267	yhdV	5	35	4	A	8	A		0.816	57566.4	1705708800	0.472	31736	67237.3		0.872	60379.7	1901196000	0.497	37484	75420.5		0.818	61415.6	1778121000	0.517	35595	68849.1		59787.3	1149.98	1795008600	5.70605e+07	0.495333	0.0130171	34938.3	1691.48		0.835333	0.0183424	70502.3	2502.74	0.740584	0.618635
JW2919	ECK2947	b2952	yggT	5	33	5	A	9	A		0.894	51631.1	1505556900	0.454	32240	71013.2		0.762	47875.9	1769117400	0.4	38700	96750		0.837	53812	1323003600	0.482	32346	67107.9		51106.3	1733.56	1532559300	1.29488e+08	0.445333	0.0240647	34428.7	2135.89		0.831	0.038223	78290.4	9298.41	0.740584	0.615425
JW3316	ECK3341	b3353	yheT	5	35	5	A	10	A		0.719	50667.8	1724997600	0.428	34637	80927.6		0.869	60586.7	2031505200	0.502	45142	89924.3		0.829	60200.2	1795320000	0.504	38922	77226.2		57151.6	3243.78	1850607600	9.26989e+07	0.478	0.0250067	39567	3049.63		0.805667	0.0448454	82692.7	3770.38	0.740584	0.596664
JW2938	ECK2966	b2971	yghG	5	33	6	A	11	A		0.853	60844.9	2315889900	0.504	55348	109817		0.666	56892.7	2647685700	0.464	64749	139545		0.652	49565.3	2272794300	0.421	55248	131230		55767.7	3304.37	2412123300	1.18436e+08	0.463	0.0239653	58448.3	3150.47		0.723667	0.0647928	126864	8854.98	0.740584	0.535936
JW3344	ECK3368	b3381	yhfX	5	35	6	A	12	A		0.943	57256.6	2045448900	0.49	46386	94665.3		0.89	54960.6	2805111000	0.444	64583	145457		0.629	45951.7	2206843200	0.389	48782	125404		52722.9	3449.9	2352467700	2.31067e+08	0.441	0.0291947	53250.3	5708.39		0.820667	0.097047	121842	14770.1	0.740584	0.607773
JW2992	ECK3015	b3024	ygiW	5	33	7	A	13	A		1.476	74223.4	2128365900	0.587	47086	80214.7		1.008	66118.4	2386540800	0.581	55778	96003.4		0.836	53696.3	1853795700	0.476	41358	86886.6		64679.4	5969.16	2122900800	1.53815e+08	0.548	0.0360416	48074	4191.91		1.10667	0.191225	87701.5	4576.01	0.740584	0.81958
JW3397	ECK3420	b3434	yhgN	5	35	7	A	14	A		0.92	55152	1522831500	0.479	31446	65649.3		1.222	65930.8	1585491300	0.585	35889	61348.7		0.942	62180.4	1485351900	0.541	31252	57767.1		61087.7	3159.16	1531224900	2.92108e+07	0.535	0.0307463	32862.3	1514.37		1.028	0.0972077	61588.4	2278.54	0.740584	0.76132
JW3007	ECK3030	b3039	zupT	5	33	8	A	15	A		0.697	44840.7	2456413200	0.4	50068	125170		0.605	44802.8	2589665400	0.387	55826	144253		0.449	41082.7	2292607800	0.341	44010	129062		43575.4	1246.41	2446228800	8.59042e+07	0.376	0.0178979	49968	3411.35		0.583667	0.0723817	132828	5821.89	0.740584	0.432254
JW3432	ECK3451	b3467	yhhM	5	35	8	A	16	A		0.896	50270.4	2124251100	0.458	44809	97836.2		0.927	53856.9	2034611100	0.484	46833	96762.4		0.954	57761.5	1804857300	0.518	39816	76864.9		53962.9	2163.13	1987906500	9.51124e+07	0.486667	0.0173718	43819.3	2085.2		0.925667	0.0167564	90487.8	6818.54	0.740584	0.685534
JW3035	ECK3053	b3063	ygjE	5	33	9	A	17	A		0.872	54361.9	1887290100	0.486	41424	85234.6		0.857	55645.7	2063952000	0.481	51064	106162		0.723	51859.4	1600318800	0.444	36921	83155.4		53955.7	1111.72	1850520300	1.35096e+08	0.470333	0.0132455	43136.3	4171.54		0.817333	0.047365	91517.4	7346.95	0.740584	0.605304
JW3478	ECK3494	b3510	hdeA	5	35	9	A	18	A		0.879	56729.6	1973162700	0.506	44274	87498		0.87	56418.2	2264364000	0.485	56865	117247		0.731	54884.1	1747816200	0.465	40309	86686		56010.6	570.408	1995114300	1.49518e+08	0.485333	0.0118369	47149.3	4990.86		0.826667	0.0479038	97143.8	10054.5	0.740584	0.612216
JW3053	ECK3072	b3082	ygjM	5	33	10	A	19	A		0.874	54206	2331635400	0.484	51726	106872		0.988	61978.5	2098652400	0.527	48086	91244.8		0.718	54538.6	2047128300	0.465	45072	96929		56907.7	2537.22	2159138700	8.75215e+07	0.492	0.0183394	48294.7	1923.68		0.86	0.078256	98348.6	4566.66	0.740584	0.636902
JW3491	ECK3508	b3523	yhjE	5	35	10	A	20	A		0.875	52905.3	2568550500	0.458	59278	129428		0.689	47439.5	2796160500	0.403	69861	173352		0.565	46665.7	2168068500	0.393	52002	132321		49003.5	1963.65	2510926500	1.83589e+08	0.418	0.0202073	60380.3	5184.83		0.709667	0.0900839	145034	14184	0.740584	0.525568
JW3073	ECK3093	b3102	yqjG	5	33	11	A	21	A		0.912	56613	2164617900	0.499	48223	96639.3		0.819	52877.2	2625135300	0.463	67704	146229		0.658	51645.5	2290852800	0.442	53239	120450		53711.9	1493.48	2360202000	1.37388e+08	0.468	0.0166433	56388.7	5840.02		0.796333	0.0741942	121106	14319.1	0.740584	0.589752
JW3532	ECK3549	b4553	ysaB	5	35	11	A	22	A		0.853	56748.3	2445625800	0.503	52955	105278		0.971	54471.1	2434779900	0.52	58566	112627		0.678	51796.1	2120868900	0.457	44718	97851.2		54338.5	1431.13	2333758200	1.06491e+08	0.493333	0.0188178	52079.7	4021.46		0.834	0.0851136	105252	4265.4	0.740584	0.617647
JW3118	ECK3137	b3149	yraO	5	33	12	A	23	A		1.004	60500.5	1796805000	0.537	42610	79348.2		1.125	59745	1836457200	0.55	49801	90547.3		0.792	55032.3	1647601200	0.488	40332	82647.5		58425.9	1710.78	1760287800	5.74943e+07	0.525	0.0188768	44247.7	2853.47		0.973667	0.0973179	84181	3322.56	0.740584	0.721082
JW3568	ECK3583	b3594	yibA	5	35	12	A	24	A		1.333	61805.5	2269748700	0.574	60187	104855		1.568	63836.8	1620673200	0.592	49176	83067.6		0.818	51246.4	2132631900	0.445	56908	127883		58962.9	3902.58	2007684600	1.97513e+08	0.537	0.0462925	55423.7	3264.1		1.23967	0.221479	105269	12938.8	0.740584	0.918077
JW3633	ECK3649	b3659	setC	5	37	1	A	1	B		0.697	38151.3	2497420800	0.358	46850	130866		0.821	41944.4	3486340800	0.395	81825	207152		0.799	45394.2	2968447500	0.429	68362	159352		41830	2091.64	2984069700	2.85583e+08	0.394	0.020502	65679	10185.1		0.772333	0.0381983	165790	22255.9	0.740584	0.571978
JW4148	ECK4186	b4190	yjfP	5	39	1	A	2	B		0.747	46355.8	1911580200	0.4	37997	94992.5		0.675	45886.4	2382663600	0.387	50325	130039		0.65	46690.4	1947846600	0.403	41600	103226		46310.9	233.173	2080696800	1.51346e+08	0.396667	0.00491031	43307.3	3659.74		0.690667	0.0290765	109419	10580.3	0.861677	0.595132
JW3674	ECK3689	b3697	yidA	5	37	2	A	3	B		0.838	67144.3	2714367600	0.531	48639	91598.9		0.857	66002.7	2592857700	0.547	45678	83506.4		0.652	66682.2	2431904400	0.541	44426	82118.3		66609.7	331.551	2579709900	8.18047e+07	0.539667	0.00466667	46247.7	1249.1		0.782333	0.0653971	85741.2	2956.12	0.861677	0.674119
JW4179	ECK4216	b4220	ytfM	5	39	2	A	4	B		0.745	50640.6	2103893100	0.416	40630	97668.3		0.529	44430.6	2586425400	0.367	49281	134281		0.584	50320.4	2159313300	0.419	43055	102757		48463.9	2018.76	2283210600	1.52449e+08	0.400667	0.0168556	44322	2576.43		0.619333	0.0648083	111568	11450.7	0.861677	0.533665
JW3733	ECK3748	b3754	hsrA	5	37	3	A	5	B		0.627	44187.1	2527702200	0.379	51892	136918		0.454	40163.2	3311567100	0.331	61422	185565		0.436	38651.5	2821840200	0.333	58812	176613		41000.6	1651.94	2887036500	2.28618e+08	0.347667	0.0156773	57375.3	2843.31		0.505667	0.0608888	166365	14948.6	0.861677	0.435721
JW4207	ECK4243	b4249	yjgI	5	39	3	A	6	B		0.759	51543.3	1892377800	0.424	37051	87384.4		0.555	45185.7	2271738600	0.366	42376	115781		0.638	50394.2	1901680200	0.414	38832	93797.1		49041	1956.01	2021932200	1.24932e+08	0.401333	0.017901	39419.7	1565.03		0.650667	0.0592293	98987.7	8598.52	0.861677	0.560665
JW3809	ECK3826	b3832	rmuC	5	37	4	A	7	B		0.74	48021.8	2033136900	0.405	39823	98328.4		0.57	42373.7	2323569600	0.35	46379	132511		0.626	47826.9	2076168600	0.411	42745	104002		46074.1	1851.08	2144291700	9.04956e+07	0.388667	0.0194108	42982.3	1896.27		0.645333	0.0500178	111614	10576.3	0.861677	0.556069
JW5968	ECK4298	b4566	yjhX	5	39	4	A	8	B		0.729	47200.2	1905894000	0.384	36498	95046.9		0.578	43124.7	2289977100	0.34	42825	125956		0.591	46301.8	1905920100	0.379	39646	104607		45542.2	1236.29	2033930400	1.28023e+08	0.367667	0.0139084	39656.3	1826.45		0.632667	0.0483126	108537	9136.44	0.861677	0.545154
JW3849	ECK3871	b3878	yihQ	5	37	5	A	9	B		0.405	43013.1	3878455500	0.325	62581	192557		0.385	40886.2	5158000800	0.306	88158	288098		0.474	52317	4239914400	0.4	75254	188135		45405.4	3509.91	4425456900	3.80845e+08	0.343667	0.0286957	75331	7383.54		0.421333	0.0269588	222930	32609	0.861677	0.363053
JW4303	ECK4331	b4340	yjiR	5	39	5	A	10	B		0.782	56342.2	1218024000	0.441	23040	52244.9		0.604	49157	1315512000	0.383	24676	64428.2		0.712	58404.6	1152481500	0.473	24353	51486.3		54634.6	2802.76	1228672500	4.73631e+07	0.432333	0.0263397	24023	500.266		0.699333	0.051773	56053.1	4193.26	0.861677	0.602599
JW3892	ECK3913	b3921	yiiR	5	37	6	A	11	B		0.724	53319.1	1967094900	0.422	35107	83191.9		0.597	45165.7	2125611000	0.368	38891	105682		0.645	51186.9	1817970300	0.428	34926	81602.8		49890.5	2441.29	1970225400	8.8822e+07	0.406	0.0190788	36308	1292.56		0.655333	0.037024	90158.9	7775.11	0.861677	0.564686
JW4350	ECK4379	b4387	ytjB	5	39	6	A	12	B		0.615	47695.1	1827527400	0.402	30596	76109.5		0.714	50010	2120850000	0.402	38515	95808.5		0.553	46740	1973935800	0.389	36438	93671		48148.4	970.806	1974104400	8.4675e+07	0.397667	0.00433333	35183	2370.58		0.627333	0.046884	88529.6	6240.66	0.861677	0.540559
JW3963	ECK3991	b3999	yjaG	5	37	7	A	13	B		0.852	55523.1	1574190000	0.455	28466	62562.6		0.686	53068	1912626900	0.435	36686	84335.6		0.767	55107.3	1557834300	0.466	34423	73869.1		54566.1	758.626	1681550400	1.15635e+08	0.452	0.00907377	33191.7	2451.48		0.768333	0.0479247	73589.1	6286.88	0.861677	0.662055
JW0698	ECK0697	b0708	phr	5	39	7	A	14	B		0.653	58120.7	3040458300	0.451	52955	117417		0.581	55531.2	3157938900	0.467	57776	123717		0.519	55619.8	2823284700	0.457	54870	120066		56423.9	848.771	3007227300	9.80248e+07	0.458333	0.00466667	55200.3	1401.47		0.584333	0.0387184	120400	1826.46	0.861677	0.503507
JW3990	ECK4022	b4030	yjbA	5	37	8	A	15	B		0.706	52432.2	1851931800	0.425	32787	77145.9		0.936	61600.1	2011018500	0.507	37420	73806.7		0.759	58474.3	2055777300	0.485	38941	80290.7		57502.2	2690.82	1972909200	6.18533e+07	0.472333	0.024504	36382.7	1850.67		0.800333	0.0695374	77081.1	1872.05	0.861677	0.689629
JW1831	ECK1843	b1842	holE	5	39	8	A	16	B		0.927	68302.4	1924379100	0.539	36746	68174.4		0.935	66312	1987143300	0.537	40833	76039.1		0.856	65400.2	1626092100	0.532	33173	62355.3		66671.6	856.873	1845871500	1.11373e+08	0.536	0.00208167	36917.3	2212.91		0.906	0.0251064	68856.3	3964.87	0.861677	0.780679
JW4025	ECK4057	b4064	yjcD	5	37	9	A	17	B		0.69	49550.8	2125945800	0.411	40537	98630.2		0.57	43467.2	2239086600	0.356	44729	125643		0.689	51435.8	1729895400	0.437	35993	82363.8		48151.3	2404.41	2031642600	1.54368e+08	0.401333	0.023877	40419.7	2522.55		0.649667	0.0398344	102212	12621.4	0.861677	0.559803
JW3835	ECK3855	b3863	polA	5	39	9	A	18	B		0.855	50657.5	1267065000	0.427	23327	54630		0.819	52213	1478868300	0.419	28029	66895		0.809	57609	1473379200	0.46	28181	61263		53493.2	2106.34	1406437500	6.97043e+07	0.435333	0.0125477	26512.3	1593.27		0.827667	0.0139682	60929.3	3544.53	0.861677	0.713181
JW4069	ECK4101	b4108	phnA	5	37	10	A	19	B		0.791	61413.8	2091595500	0.481	39484	82087.3		0.763	53352.7	2164329900	0.444	45105	101588		0.726	55052.3	1860542100	0.461	39159	84943.6		56606.2	2453.31	2038822500	9.15797e+07	0.462	0.0106927	41249.3	1930.11		0.76	0.0188237	89539.6	6080.29	0.861677	0.654875
JW4312	ECK4339	b4349	hsdM	5	39	10	A	20	B		0.668	50786.5	2241568800	0.406	41718	102754		0.716	50401	2427852600	0.409	50285	122946		0.681	55001	2466005400	0.433	49876	115187		52062.8	1473.29	2378475600	6.93338e+07	0.416	0.008544	47293	2790		0.688333	0.0143333	113629	5880.9	0.861677	0.593121
JW4101	ECK4135	b4141	yjeH	5	37	11	A	21	B		0.78	58599.1	1755088200	0.48	33165	69093.8		1.207	69606.2	1466940600	0.623	32785	52624.4		0.786	63677	1944440100	0.519	37451	72159.9		63960.8	3180.64	1722156300	1.38822e+08	0.540667	0.0426784	34467	1496.03		0.924333	0.141344	64626	6065.74	0.861677	0.796477
JW0102	ECK0105	b0106	hofC	5	39	11	A	22	B		1.031	70832	1832182200	0.571	37717	66054.3		1.09	66141.9	1958671800	0.556	49526	89075.5		0.945	68611.1	1748090700	0.563	39336	69868.6		68528.3	1354.54	1846314900	6.11989e+07	0.563333	0.00433333	42193	3696.17		1.022	0.0420991	74999.5	7123.65	0.861677	0.880634
JW4136	ECK4174	b4178	yjeB	5	37	12	A	23	B		0.797	57285.3	2052014400	0.469	40805	87004.3		0.716	48980.6	1998174600	0.42	48939	116521		0.634	52104.8	1741931100	0.446	36920	82780.3		52790.2	2421.72	1930706700	9.56589e+07	0.445	0.0141539	42221.3	3541.12		0.715667	0.0470543	95435.3	10613.3	0.861677	0.616674
JW0306	ECK0312	b0314	betT	5	39	12	A	24	B		2.143	98162.8	3044645100	0.811	83280	102688		1.62	81313.9	2250168300	0.717	71938	100332		1.152	61191.7	2688813000	0.548	70448	128555		80222.8	10686.6	2661208800	2.29761e+08	0.692	0.0769437	75222	4051.89		1.63833	0.286224	110525	9040.54	0.740584	1.21332
JW1953	ECK1966	b1970	yedX	5	33	1	B	1	C		0.679	45137.8	2381847300	0.399	51510	129098		0.834	51117.1	2631414600	0.446	68876	154430		0.826	51499.3	2110630500	0.47	56933	121134		49251.4	2059.76	2374630800	1.50381e+08	0.438333	0.0208513	59106.3	5129.56		0.779667	0.0503863	134887	10038.3	0.740584	0.577409
JW3151	ECK3173	b3184	yhbE	5	35	1	B	2	C		0.73	49636.9	2319589800	0.418	44441	106318		0.601	44703.8	2749677300	0.378	55329	146373		0.736	53827.7	2082547800	0.458	44225	96561.1		49389.5	2636.76	2383938300	1.95253e+08	0.418	0.023094	47998.3	3665.86		0.689	0.0440341	116417	15240.3	0.861677	0.593695
JW1765	ECK1774	b1776	ydjL	5	33	2	B	3	C		0.755	52182.4	1961526600	0.417	35767	85772.2		0.532	44066.6	1984996800	0.376	37538	99835.1		0.62	51510.1	1811280600	0.42	34184	81390.5		49253	2600.47	1919268000	5.44171e+07	0.404333	0.0141931	35829.7	968.723		0.635667	0.0648494	88999.3	5563.62	0.946387	0.601587
JW3172	ECK3194	b3205	yhbJ	5	35	2	B	4	C		0.665	49325	3211328700	0.394	58381	148175		0.458	39439.3	3856863600	0.324	66163	204207		0.545	48422.2	2977104600	0.376	52271	139019		45728.8	3155.53	3348432300	2.63054e+08	0.364667	0.0209868	58938.3	4019.95		0.556	0.0600083	163800	20375.5	0.946387	0.526191
JW2849	ECK2877	b2881	xdhD	5	33	3	B	5	C		0.695	48697.8	2001672900	0.393	36508	92895.7		0.488	42825.6	2409125400	0.348	40362	115983		0.529	46090.2	2084731200	0.372	37733	101433		45871.2	1698.7	2165176500	1.24309e+08	0.371	0.013	38201	1136.9		0.570667	0.0632833	103437	6739.59	0.946387	0.540072
JW3209	ECK3229	b3240	aaeB	5	35	3	B	6	C		0.757	51277.9	1809954000	0.422	34183	81002.4		0.567	43945.7	2142591300	0.352	38153	108389		0.601	51720.2	1987988400	0.411	37624	91542.6		48981.2	2521.03	1980177900	9.61035e+07	0.395	0.0217332	36653.3	1244.57		0.641667	0.058496	93644.7	7975.46	0.946387	0.607265
JW2887	ECK2916	b2920	ygfH	5	33	4	B	7	C		0.698	48485	1831187700	0.402	36368	90467.7		0.498	41154.7	2370703500	0.336	43110	128304		0.527	48067.9	1974853800	0.395	39600	100253		45902.5	2376.98	2058915000	1.61316e+08	0.377667	0.0209311	39692.7	1946.8		0.574333	0.0623975	106341	11338.6	0.946387	0.543542
JW3241	ECK3267	b3280	yrdB	5	35	4	B	8	C		0.742	52222.9	1986339600	0.431	36170	83921.1		0.6	46568.5	2454668100	0.38	42648	112232		0.666	54673	2112899400	0.453	38765	85574		51154.8	2399.75	2184635700	1.39872e+08	0.421333	0.0216205	39194.3	1882.32		0.669333	0.0410257	93908.9	9173.77	0.946387	0.633448
JW2921	ECK2949	b2954	yggV	5	33	5	B	9	C		0.409	43386.4	3741345000	0.321	60108	187252		0.308	34371.7	4808615400	0.264	82244	311530		0.331	42500.3	4364991900	0.329	77980	237021		40086.2	2868.64	4304984100	3.09552e+08	0.304667	0.0204641	73444	6780.66		0.349333	0.0305632	245268	36112.1	0.946387	0.330605
JW3317	ECK3342	b3354	yheU	5	35	5	B	10	C		0.684	51952.6	1562374800	0.409	27257	66643		0.62	49424.3	1878102000	0.388	31956	82360.8		0.731	55779.4	1645336800	0.451	29630	65698.4		52385.4	1847.27	1695271200	9.45004e+07	0.416	0.0185203	29614.3	1356.51		0.678333	0.032168	71567.4	5403.58	0.946387	0.641966
JW2952	ECK2978	b2984	yghR	5	33	6	B	11	C		0.597	46978.8	1994895900	0.371	34205	92196.8		0.564	47057.1	2260961100	0.393	40422	102855		0.702	53321.1	2075313600	0.453	39104	86322.3		49119	2101.17	2110390200	7.87833e+07	0.405667	0.024504	37910.3	1891.33		0.621	0.0416053	93791.3	4838.71	0.946387	0.587706
JW3351	ECK3375	b3388	damX	5	35	6	B	12	C		0.673	52505	1390538700	0.385	22999	59737.7		0.524	49306.3	1590121800	0.394	27855	70698		0.664	52383.8	1317142800	0.407	23729	58302.2		51398.4	1046.61	1432601100	8.15604e+07	0.395333	0.00638575	24861	1511.76		0.620333	0.0482367	62912.6	3914.67	0.946387	0.587075
JW2995	ECK3018	b3027	ygiZ	5	33	7	B	13	C		0.791	70917.1	347836500	0.563	6294	11179.4		0.851	72972.4	405414900	0.645	7584	11758.1		0.81	74471.3	325280700	0.617	6475	10494.3		72787	1030.19	359510700	2.38578e+07	0.608333	0.0240647	6784.33	403.233		0.817333	0.0177044	11144	365.261	0.946387	0.773514
JW3403	ECK3425	b3440	yhhX	5	35	7	B	14	C		0.677	46866.7	2121115500	0.385	38804	100790		0.55	42853.3	2254867200	0.352	43128	122523		0.656	50844	1943413200	0.424	38303	90337.3		46854.7	2306.71	2106465300	9.02069e+07	0.387	0.0208087	40078.3	1531.68		0.627667	0.0393037	104550	9479.46	0.946387	0.594016
JW3008	ECK3031	b3040	ygiE	5	33	8	B	15	C		0.58	52751	5688106200	0.409	116820	285623		0.598	54839.5	4705733700	0.428	94739	221353		0.582	54721.1	3786255000	0.436	91618	210133		54103.9	677.304	4726698300	5.49117e+08	0.424333	0.00800694	101059	7931.83		0.586667	0.005696	239036	23517.6	0.946387	0.555214
JW3433	ECK3452	b3468	yhhN	5	35	8	B	16	C		0.754	51343.6	1965456000	0.42	37066	88252.4		0.796	52060.8	2057649300	0.427	39533	92583.1		0.737	53668.8	1994300100	0.453	39920	88123.6		52357.7	687.463	2005801800	2.72282e+07	0.433333	0.0100388	38839.7	893.842		0.762333	0.0175341	89653	1465.52	0.946387	0.721462
JW3040	ECK3058	b3068	ygjF	5	33	9	B	17	C		0.66	52524.4	1782415800	0.4	30498	76245		0.744	51872.6	1794973500	0.423	32441	76692.7		0.738	59495.1	1839737700	0.485	33273	68604.1		54630.7	2439.49	1805709000	1.73962e+07	0.436	0.0253837	32070.7	822.196		0.714	0.0270555	73847.3	2624.75	0.946387	0.67572
JW3479	ECK3495	b3511	hdeD	5	35	9	B	18	C		0.66	51874.4	1629394200	0.413	29141	70559.3		0.733	55508.4	1652835600	0.424	29360	69245.3		0.724	61028.3	1769446800	0.469	33591	71622.6		56137	2661.13	1683892200	4.33092e+07	0.435333	0.0171302	30697.3	1448.21		0.705667	0.0229807	70475.7	687.544	0.946387	0.667834
JW3054	ECK3073	b3083	ygjN	5	33	10	B	19	C		0.777	49949.1	2422701000	0.425	47883	112666		0.603	42458.9	2412788400	0.357	49729	139297		0.73	54310.5	2229113700	0.452	46898	103757		48906.2	3460.76	2354867700	6.29421e+07	0.411333	0.0282627	48170	829.742		0.703333	0.051969	118573	10676.3	0.946387	0.665626
JW3503	ECK3520	b3535	yhjR	5	35	10	B	20	C		0.823	57895.2	1799538300	0.476	34289	72035.7		0.808	54118.4	1927067400	0.449	39147	87187.1		0.815	59235.6	1656365400	0.491	34265	69786.2		57083.1	1531.98	1794323700	7.81884e+07	0.472	0.0122882	35900.3	1623.35		0.815333	0.00433333	76336.3	5464.11	0.946387	0.771621
JW3074	ECK3094	b3103	yhaH	5	33	11	B	21	C		0.741	46771.1	2337356700	0.401	45950	114589		0.651	43807.1	2421180900	0.385	53454	138842		0.59	47558.2	2117844000	0.409	45206	110528		46045.5	1142.01	2292127200	9.04389e+07	0.398333	0.00705534	48203.3	2634.1		0.660667	0.0438571	121319	8839.14	0.946387	0.625246
JW3533	ECK3550	b3561	yiaH	5	35	11	B	22	C		0.821	57184.6	1852212600	0.464	34704	74793.1		0.939	56497.1	1877065200	0.496	43948	88604.8		0.762	56425.5	1749416400	0.469	36876	78626.9		56702.4	241.965	1826231400	3.90718e+07	0.476333	0.0099387	38509.3	2790.68		0.840667	0.0520331	80674.9	4116.51	0.946387	0.795596
JW3119	ECK3138	b3150	yraP	5	33	12	B	23	C		0.937	72869.8	1535483700	0.573	31766	55438		1.28	79493	1173721500	0.652	30519	46808.3		0.856	66315.3	1205882100	0.52	27178	52265.4		72892.7	3804.09	1305029100	1.15601e+08	0.581667	0.0383507	29821	1369.65		1.02433	0.129954	51503.9	2520.13	0.861677	0.882644
JW3570	ECK3585	b3596	yibG	5	35	12	B	24	C		1.132	59535.4	2723147100	0.561	70246	125216		1.319	58134	1965171600	0.57	60915	106868		0.78	50425.7	2186322300	0.469	55198	117693		56031.7	2832.05	2291547000	2.25045e+08	0.533333	0.0322714	62119.7	4385.54		1.077	0.158007	116592	5324.91	0.740584	0.797609
JW5965	ECK3652	b4555	yicS	5	37	1	B	1	D		0.75	48606.4	1975122900	0.413	39639	95978.2		1.018	58131.8	2139957000	0.512	50811	99240.2		0.896	55619.5	1609277400	0.505	39765	78742.6		54119.2	2850.23	1908119100	1.56814e+08	0.476667	0.0318974	43405	3703.18		0.888	0.0774683	91320.3	6358.99	0.740584	0.657639
JW4149	ECK4187	b4191	ulaR	5	39	1	B	2	D		0.775	46593.9	2702064600	0.423	52454	124005		0.515	39526.1	3263103900	0.349	67529	193493		0.62	45173.3	2575057500	0.404	58253	144191		43764.5	2158.48	2846742000	2.11385e+08	0.392	0.0221886	59412	4390.19		0.636667	0.0755167	153896	20638.1	0.861677	0.548601
JW3688	ECK3703	b3710	mdtL	5	37	2	B	3	D		0.768	54499.8	1804685400	0.45	34287	76193.3		0.583	47109.1	2138098500	0.403	40856	101380		0.716	53348.5	1883283300	0.46	37638	81821.7		51652.4	2295.87	1942022400	1.00629e+08	0.437667	0.0175721	37593.7	1896.44		0.689	0.0550848	86464.9	7632.32	0.946387	0.652061
JW4180	ECK4217	b4221	ytfN	5	39	2	B	4	D		0.806	50058.8	2215640700	0.427	42934	100548		0.458	37614.9	2713365900	0.315	50999	161902		0.621	47725.4	2274261300	0.402	46259	115072		45133	3818.95	2401089300	1.57053e+08	0.381333	0.0339428	46730.7	2340.08		0.628333	0.100526	125841	18511.6	1	0.628333
JW3737	ECK3757	b3764	yifE	5	37	3	B	5	D		0.372	39527.4	4850760600	0.304	86749	285359		0.28	32510.8	4802817600	0.245	79299	323669		0.328	40892.6	4305368700	0.318	80827	254173		37643.6	2596.48	4652982300	1.74357e+08	0.289	0.0223681	82291.7	2271.9		0.326667	0.0265665	287734	20097	1	0.326667
JW4212	ECK4248	b4255	yjgD	5	39	3	B	6	D		0.756	52318.1	2064564000	0.419	37666	89895		0.564	44831.9	2771233200	0.349	48481	138914		0.689	55209.6	2655814500	0.431	50337	116791		50786.5	3092.11	2497203900	2.18871e+08	0.399667	0.0255691	45494.7	3950.83		0.669667	0.0562623	115200	14172.9	1	0.669667
JW3830	ECK3850	b3858	yihD	5	37	4	B	7	D		0.633	48269.7	1936358100	0.387	34419	88938		0.528	42962.7	2242597500	0.344	37044	107686		0.614	53155.3	2042958600	0.437	36580	83707.1		48129.2	2943.19	2073971400	8.97533e+07	0.389333	0.0268721	36014.3	808.835		0.591667	0.0323024	93443.7	7279.51	1	0.591667
JW4271	ECK4299	b4308	yjhR	5	39	4	B	8	D		0.688	46095	2085787800	0.386	37839	98028.5		0.466	38586.1	2603790900	0.32	45459	142059		0.583	47007.4	2023371000	0.397	38922	98040.3		43896.2	2668.09	2237649900	1.83955e+08	0.367667	0.0240439	40740	2380.12		0.579	0.0641171	112709	14675	1	0.579
JW3850	ECK3872	b3879	yihR	5	37	5	B	9	D		0.678	47923.1	1949956200	0.394	34600	87817.3		0.529	43259.1	2355742800	0.355	41959	118194		0.651	51309.1	1950336900	0.435	36723	84420.7		47497.1	2333.56	2085345300	1.35199e+08	0.394667	0.0230964	37760.7	2186.8		0.619333	0.0458342	96810.8	10736.7	1	0.619333
JW4304	ECK4332	b4341	yjiS	5	39	5	B	10	D		0.618	46306.6	1949820300	0.369	33195	89959.3		0.59	45227.6	2453083200	0.363	41612	114634		0.715	55098.1	2241458100	0.442	43388	98162.9		48877.4	3125.88	2214787200	1.4589e+08	0.391333	0.0253925	39398.3	3143.75		0.641	0.0378726	100919	7254.89	1	0.641
JW3893	ECK3914	b3922	yiiS	5	37	6	B	11	D		0.772	68149.4	2168577000	0.562	35545	63247.3		0.66	57158.9	2443198500	0.483	41521	85964.8		0.747	68588.4	2121540300	0.549	36860	67140.3		64632.2	3738.81	2244438600	1.00303e+08	0.531333	0.0244563	37975.3	1813.02		0.726333	0.0339428	72117.5	7014.28	1	0.726333
JW4354	ECK4383	b4391	yjjK	5	39	6	B	12	D		0.659	57659.3	1783579500	0.443	29958	67625.3		0.752	59243.8	2241961200	0.491	40775	83044.8		0.739	64446.3	1962465300	0.496	40537	81727.8		60449.8	2049.93	1996002000	1.33382e+08	0.476667	0.0168951	37090	3566.66		0.716667	0.0290765	77466	4935.01	1	0.716667
JW3965	ECK3993	b4001	yjaH	5	37	7	B	13	D		0.683	54189.9	2359849500	0.415	39463	95091.6		0.61	47879.4	2834325000	0.384	49468	128823		0.561	50068.9	2420658900	0.406	44717	110140		50712.7	1849.92	2538277800	1.49061e+08	0.401667	0.00920748	44549.3	2889.41		0.618	0.0354448	111352	9756.22	1	0.618
JW1048	ECK1046	b1061	dinI	5	39	7	B	14	D		0.587	46141	1974552300	0.357	34794	97462.2		0.67	50891	2193345900	0.402	42274	105159		0.65	51312.5	2018057400	0.417	39715	95239.8		49448.2	1658.06	2061985200	6.68703e+07	0.392	0.0180278	38927.7	2194.88		0.635667	0.0250089	99287.1	3005.34	1	0.635667
JW3998	ECK4030	b4038	yjbI	5	37	8	B	15	D		0.586	49113.9	2754191700	0.374	46153	123404		0.667	51119.5	2647206000	0.394	46602	118279		0.709	58664.4	2699410500	0.461	53054	115085		52965.9	2907.48	2700269400	3.08871e+07	0.409667	0.026308	48603	2229.27		0.654	0.0360971	118923	2422.98	1	0.654
JW1850	ECK1862	b1861	ruvA	5	39	8	B	16	D		0.792	57535.7	1859225400	0.458	31990	69847.2		0.8	54826.6	1826307900	0.448	33348	74437.5		0.778	60051.6	1801436400	0.497	34628	69674		57471.3	1508.68	1828989900	1.67361e+07	0.467667	0.0149481	33322	761.636		0.79	0.0064291	71319.6	1559.77	1	0.79
JW4026	ECK4058	b4065	yjcE	5	37	9	B	17	D		0.742	51668	1783638000	0.42	31360	74666.7		0.657	46929.2	1732477500	0.392	33188	84663.3		0.688	51628.1	1596983400	0.431	31530	73155.5		50075.1	1572.99	1704366300	5.56856e+07	0.414333	0.0116094	32026	583.069		0.695667	0.024835	77495.1	3610.52	1	0.695667
JW3906	ECK3927	b3935	priA	5	39	9	B	18	D		0.795	58190.9	1649479500	0.472	29116	61686.4		0.719	53478.8	1662243300	0.435	29689	68250.6		0.843	64316.9	1599217200	0.538	31462	58479.6		58662.2	3137.54	1636980000	1.92376e+07	0.481667	0.0301238	30089	706.147		0.785667	0.0360986	62805.5	2875.61	1	0.785667
JW4070	ECK4102	b4109	yjdA	5	37	10	B	19	D		0.831	60155	1704403800	0.495	31011	62648.5		0.73	53176.1	1724616000	0.435	31195	71712.6		0.843	62628.6	1628378100	0.516	31118	60306.2		58653.2	2830.11	1685799300	2.92975e+07	0.482	0.0242693	31108	53.351		0.801333	0.0358345	64889.1	3478.12	1	0.801333
JW4314	ECK4341	b4351	mrr	5	39	10	B	20	D		0.731	53034.5	2172429900	0.44	41731	94843.2		0.531	39396.5	2634365700	0.336	53704	159833		0.709	50551.3	2057744700	0.432	45706	105801		47660.8	4193.84	2288180100	1.7623e+08	0.402667	0.0334132	47047	3520.74		0.657	0.0633193	120159	20087.7	1	0.657
JW4105	ECK4139	b4145	yjeJ	5	37	11	B	21	D		0.81	58843.7	1928713500	0.486	36457	75014.4		0.809	53591.2	1983306600	0.459	40588	88427		0.723	55139.8	1988606700	0.461	42019	91147.5		55858.3	1558.23	1966875600	1.91423e+07	0.468667	0.00868588	39688	1667.48		0.780667	0.0288348	84863	4986.52	1	0.780667
JW0103	ECK0106	b0107	hofB	5	39	11	B	22	D		0.788	52061	2154733200	0.439	41545	94635.5		0.817	49288.8	2001553200	0.444	47128	106144		0.638	51249.3	2108088900	0.438	44934	102589		50866.4	822.873	2088125100	4.53319e+07	0.440333	0.00185592	44535.7	1623.93		0.747667	0.0554687	101123	3402.17	0.946387	0.707582
JW4138	ECK4176	b4180	rlmB	5	37	12	B	23	D		0.904	59973.5	1720593900	0.503	32850	65308.2		1.176	63677.3	1490951700	0.573	37232	64977.3		0.885	59393	1331652600	0.511	28300	55381.6		61014.6	1341.87	1514399400	1.12888e+08	0.529	0.0221209	32794	2578.6		0.988333	0.0939935	61889	3255.11	0.861677	0.851624
JW0327	ECK0333	b0336	codB	5	39	12	B	24	D		1.246	74257.3	1960977600	0.633	46735	73831		1.584	71683.2	1339932600	0.651	38446	59056.8		1.057	66739.8	1681640100	0.572	43819	76606.6		70893.4	2205.76	1660850100	1.79581e+08	0.618667	0.0239049	43000	2427.62		1.29567	0.154145	69831.5	5446.58	0.740584	0.95955
JW1998	ECK2010	b2016	yeeZ	5	33	1	C	1	E		0.879	56742.5	1215924300	0.5	27528	55056		1.093	59511	2310048000	0.55	58761	106838		0.868	55526.8	1839464100	0.511	46622	91236.8		57260.1	1178.88	1788478800	3.16873e+08	0.520333	0.0151694	44303.7	9090.4		0.946667	0.0732355	84377	15336.7	0.740584	0.701086
JW3159	ECK3181	b3192	yrbC	5	35	1	C	2	E		0.829	56019.2	1623580200	0.468	31366	67021.4		0.871	56786.9	2027414700	0.473	40800	86257.9		0.955	62420.7	1535514300	0.53	31683	59779.2		58408.9	2018.08	1728836400	1.51438e+08	0.490333	0.0198858	34616.3	3093.19		0.885	0.0370405	71019.5	7900.82	0.861677	0.762584
JW3109	ECK3128	b3140	agaD	5	33	2	C	3	E		0.729	54599.8	2120945400	0.448	41542	92727.7		0.576	48740.8	2531443500	0.419	51207	122212		0.714	55441.8	2102724000	0.465	43004	92481.7		52927.5	2107.39	2251704300	1.39968e+08	0.444	0.0134288	45251	3007.76		0.673	0.0486929	102474	9869.49	0.946387	0.636918
JW3174	ECK3196	b3207	yrbL	5	35	2	C	4	E		0.773	51762	2258539200	0.434	42859	98753.5		0.553	41969.2	3068876700	0.345	54140	156928		0.637	52590.7	2578893300	0.43	49377	114830		48774	3410.76	2635436400	2.35627e+08	0.403	0.029023	48792	3269.65		0.654333	0.0640971	123504	17344.3	1	0.654333
JW2864	ECK2891	b2896	ygfX	5	33	3	C	5	E		0.754	52980.9	1867746600	0.43	33667	78295.3		0.589	47525.9	2166662700	0.389	36959	95010.3		0.669	55157.9	1881972900	0.452	33405	73904.9		51888.3	2269.9	1972127400	9.73543e+07	0.423667	0.0184602	34677	1143.5		0.670667	0.0476387	82403.5	6429.55	1	0.670667
JW3210	ECK3230	b3241	aaeA	5	35	3	C	6	E		0.697	48527.9	1707571800	0.399	31206	78210.5		0.588	44159.3	2195082900	0.36	37848	105133		0.679	53940.1	1694104200	0.442	30866	69832.6		48875.8	2828.81	1865586300	1.64794e+08	0.400333	0.0236807	33306.7	2272.79		0.654667	0.0337359	84392.1	10648.9	1	0.654667
JW2889	ECK2918	b2922	yggE	5	33	4	C	7	E		0.682	47848.8	1789031700	0.404	34022	84212.9		0.437	38849.8	2541300300	0.32	46618	145681		0.582	48139.5	1775745000	0.402	35171	87490		44946	3049.24	2035359000	2.53e+08	0.375333	0.0276727	38603.7	4020.87		0.567	0.071122	105795	19965.7	1	0.567
JW3245	ECK3271	b3284	smg	5	35	4	C	8	E		0.772	51427.2	1617111000	0.429	29068	67757.6		0.604	47580.1	2042547300	0.393	36487	92842.2		0.711	54874.9	1726930800	0.457	32298	70674		51294.1	2106.87	1795529700	1.27513e+08	0.426333	0.0185233	32617.7	2147.64		0.695667	0.0490997	77091.3	7920.36	1	0.695667
JW2922	ECK2950	b2955	yggW	5	33	5	C	9	E		0.69	48366.4	1894021200	0.398	34225	85992.5		0.553	40419	2241489600	0.341	40049	117446		0.638	52113.2	1767791700	0.41	32283	78739		46966.2	3447.64	1967767500	1.41629e+08	0.383	0.0212838	35519	2333.35		0.627	0.0399291	94059.1	11879.3	1	0.627
[truncated: 2,596 more rows]
